# Supplementary material for: MCAK recognizes the nucleotide-dependent feature at growing microtubule ends
Source: eLife journal article supplement (doi:10.7554/elife.92958), 2023-11-17
Supplement: app1-fig2-data1 [file supplementary Figure8 source data1.xlsx]

## Sheet: Fig. s8A
kon (×10-6, s-1 nM-1tubulin dimer-1)
6.64767
5.69801
5.69801
5.69801
5.12564
4.884
4.74834
3.79867
3.79867
3.79867
3.31923
3.31923
3.108
2.849
2.849
2.849
2.849
2.849
2.77951
2.73067
2.62985
2.442
2.40761
2.2945
2.2792
2.17758
2.13675
2.04474
2.01106
1.89934
1.89934
1.89934
1.89934
1.89934
1.89934
1.89934
1.89934
1.78063
1.58572
1.44865
1.26622
1.19539
1.10284
1.06838
0.94967
0.94967
0.94967
0.94967
0.94967
0.94967
0.94967
0.94967
0.94967
0.94967
0.94967
0.94967
0.94967
0.94967
0.94967
0.94967
0.94967
0.94967
0.94967
0.94967
0.94967
0.94967
0.94967
0.94967
0.94967
0.94967
0.94967

## Sheet: Fig. s8B
dwell time (s)	probability
0.39	0.46053
0.77	0.24342
1.15	0.13816
1.53	0.05921
1.91	0.03947
2.29	0.01974
2.67	0.00658
3.05	0.00658
3.43	0.00658
3.81	0.01974
