# Supplementary material for: MCAK recognizes the nucleotide-dependent feature at growing microtubule ends
Source: eLife journal article supplement (doi:10.7554/elife.92958), 2023-11-17
Supplement: fig1-data1 [file Figure1_source data 1.xlsx]

## Sheet: Figure. 1B
growing microtubule end					GFP-MCAK
position (nm)	normalized intensity of a growing microtubule end	position (nm)	half-Gaussian fit to a growing microtubule end		position (nm)	normalized intensity of GFP-MCAK	position (nm)	Gaussian fit to the normalized intensity of GFP-MCAK
-400	1.02606	-400	1		-400	-0.18675	-400	0.00115
-320	1.01378	-397.333	1		-320	0.25333	-397.333	0.00124
-240	0.9671	-394.667	1		-240	-0.25372	-394.667	0.00133
-160	1.11563	-392	1		-160	0.09388	-392	0.00143
-80	0.94655	-389.333	1		-80	0.44679	-389.333	0.00154
0	0.86837	-386.667	1		0	0.82946	-386.667	0.00165
80	0.71381	-384	1		80	1.12709	-384	0.00178
160	0.37542	-381.333	1		160	0.7508	-381.333	0.00191
240	0.27022	-378.667	1		240	0.37557	-378.667	0.00205
320	-0.23212	-376	1		320	0.28203	-376	0.0022
400	-0.0713	-373.333	1		400	0.56372	-373.333	0.00236
480	-0.22877	-370.667	1		480	0.20124	-370.667	0.00253
560	0.06562	-368	1		560	-0.16974	-368	0.00271
640	-0.27903	-365.333	1		640	-0.22183	-365.333	0.0029
720	-0.27903	-362.667	1		720	-0.03793	-362.667	0.00311
		-360	1				-360	0.00333
		-357.333	1				-357.333	0.00356
		-354.667	1				-354.667	0.00381
		-352	1				-352	0.00407
		-349.333	1				-349.333	0.00435
		-346.667	1				-346.667	0.00465
		-344	1				-344	0.00496
		-341.333	1				-341.333	0.0053
		-338.667	1				-338.667	0.00565
		-336	1				-336	0.00603
		-333.333	1				-333.333	0.00643
		-330.667	1				-330.667	0.00685
		-328	1				-328	0.0073
		-325.333	1				-325.333	0.00777
		-322.667	1				-322.667	0.00827
		-320	1				-320	0.0088
		-317.333	1				-317.333	0.00936
		-314.667	1				-314.667	0.00995
		-312	1				-312	0.01057
		-309.333	1				-309.333	0.01123
		-306.667	1				-306.667	0.01193
		-304	1				-304	0.01266
		-301.333	1				-301.333	0.01343
		-298.667	1				-298.667	0.01425
		-296	1				-296	0.0151
		-293.333	1				-293.333	0.01601
		-290.667	1				-290.667	0.01696
		-288	1				-288	0.01795
		-285.333	1				-285.333	0.019
		-282.667	1				-282.667	0.02011
		-280	1				-280	0.02126
		-277.333	1				-277.333	0.02248
		-274.667	1				-274.667	0.02375
		-272	1				-272	0.02509
		-269.333	1				-269.333	0.02649
		-266.667	1				-266.667	0.02796
		-264	1				-264	0.0295
		-261.333	1				-261.333	0.03111
		-258.667	1				-258.667	0.0328
		-256	1				-256	0.03456
		-253.333	1				-253.333	0.0364
		-250.667	1				-250.667	0.03833
		-248	1				-248	0.04034
		-245.333	1				-245.333	0.04244
		-242.667	1				-242.667	0.04463
		-240	1				-240	0.04692
		-237.333	1				-237.333	0.0493
		-234.667	1				-234.667	0.05178
		-232	1				-232	0.05436
		-229.333	1				-229.333	0.05705
		-226.667	1				-226.667	0.05985
		-224	1				-224	0.06277
		-221.333	1				-221.333	0.06579
		-218.667	1				-218.667	0.06894
		-216	1				-216	0.0722
		-213.333	1				-213.333	0.0756
		-210.667	1				-210.667	0.07911
		-208	1				-208	0.08276
		-205.333	1				-205.333	0.08654
		-202.667	1				-202.667	0.09046
		-200	1				-200	0.09452
		-197.333	1				-197.333	0.09871
		-194.667	1				-194.667	0.10306
		-192	1				-192	0.10755
		-189.333	1				-189.333	0.11219
		-186.667	1				-186.667	0.11698
		-184	1				-184	0.12193
		-181.333	1				-181.333	0.12704
		-178.667	1				-178.667	0.13231
		-176	1				-176	0.13774
		-173.333	1				-173.333	0.14334
		-170.667	1				-170.667	0.1491
		-168	1				-168	0.15503
		-165.333	1				-165.333	0.16114
		-162.667	1				-162.667	0.16741
		-160	1				-160	0.17386
		-157.333	1				-157.333	0.18049
		-154.667	1				-154.667	0.18729
		-152	1				-152	0.19427
		-149.333	1				-149.333	0.20143
		-146.667	1				-146.667	0.20877
		-144	1				-144	0.21629
		-141.333	1				-141.333	0.22399
		-138.667	1				-138.667	0.23186
		-136	1				-136	0.23992
		-133.333	1				-133.333	0.24816
		-130.667	1				-130.667	0.25658
		-128	1				-128	0.26518
		-125.333	1				-125.333	0.27395
		-122.667	1				-122.667	0.2829
		-120	1				-120	0.29203
		-117.333	1				-117.333	0.30132
		-114.667	1				-114.667	0.31079
		-112	1				-112	0.32042
		-109.333	1				-109.333	0.33022
		-106.667	1				-106.667	0.34019
		-104	1				-104	0.35031
		-101.333	1				-101.333	0.36059
		-98.6667	1				-98.6667	0.37101
		-96	1				-96	0.38159
		-93.3333	1				-93.3333	0.39231
		-90.6667	1				-90.6667	0.40316
		-88	1				-88	0.41415
		-85.3333	1				-85.3333	0.42527
		-82.6667	1				-82.6667	0.43651
		-80	1				-80	0.44787
		-77.3333	1				-77.3333	0.45933
		-74.6667	1				-74.6667	0.4709
		-72	1				-72	0.48257
		-69.3333	1				-69.3333	0.49432
		-66.6667	1				-66.6667	0.50615
		-64	1				-64	0.51806
		-61.3333	1				-61.3333	0.53004
		-58.6667	1				-58.6667	0.54207
		-56	1				-56	0.55416
		-53.3333	1				-53.3333	0.56628
		-50.6667	1				-50.6667	0.57843
		-48	1				-48	0.59061
		-45.3333	1				-45.3333	0.6028
		-42.6667	1				-42.6667	0.61499
		-40	1				-40	0.62718
		-37.3333	1				-37.3333	0.63934
		-34.6667	1				-34.6667	0.65148
		-32	1				-32	0.66359
		-29.3333	1				-29.3333	0.67564
		-26.6667	1				-26.6667	0.68764
		-24	1				-24	0.69957
		-21.3333	1				-21.3333	0.71141
		-18.6667	1				-18.6667	0.72317
		-16	1				-16	0.73482
		-13.3333	1				-13.3333	0.74635
		-10.6667	1				-10.6667	0.75777
		-8	1				-8	0.76904
		-5.33333	1				-5.33333	0.78017
		-2.66667	1				-2.66667	0.79114
		0	1				0	0.80194
		2.66667	0.99981				2.66667	0.81256
		5.33333	0.99923				5.33333	0.82298
		8	0.99828				8	0.83321
		10.6667	0.99694				10.6667	0.84322
		13.3333	0.99522				13.3333	0.853
		16	0.99313				16	0.86255
		18.6667	0.99066				18.6667	0.87186
		21.3333	0.98781				21.3333	0.88091
		24	0.9846				24	0.88969
		26.6667	0.98102				26.6667	0.8982
		29.3333	0.97709				29.3333	0.90642
		32	0.97279				32	0.91435
		34.6667	0.96814				34.6667	0.92197
		37.3333	0.96315				37.3333	0.92929
		40	0.95781				40	0.93628
		42.6667	0.95214				42.6667	0.94294
		45.3333	0.94614				45.3333	0.94927
		48	0.93981				48	0.95526
		50.6667	0.93318				50.6667	0.96089
		53.3333	0.92623				53.3333	0.96617
		56	0.91898				56	0.97108
		58.6667	0.91144				58.6667	0.97562
		61.3333	0.90362				61.3333	0.97979
		64	0.89552				64	0.98358
		66.6667	0.88715				66.6667	0.98699
		69.3333	0.87853				69.3333	0.99
		72	0.86965				72	0.99263
		74.6667	0.86053				74.6667	0.99486
		77.3333	0.85119				77.3333	0.99669
		80	0.84162				80	0.99812
		82.6667	0.83184				82.6667	0.99915
		85.3333	0.82186				85.3333	0.99978
		88	0.81169				88	1
		90.6667	0.80134				90.6667	0.99982
		93.3333	0.79082				93.3333	0.99923
		96	0.78013				96	0.99824
		98.6667	0.7693				98.6667	0.99685
		101.333	0.75832				101.333	0.99506
		104	0.74722				104	0.99288
		106.667	0.73599				106.667	0.99029
		109.333	0.72466				109.333	0.98732
		112	0.71323				112	0.98395
		114.667	0.70171				114.667	0.9802
		117.333	0.69011				117.333	0.97607
		120	0.67844				120	0.97157
		122.667	0.66672				122.667	0.96669
		125.333	0.65494				125.333	0.96145
		128	0.64313				128	0.95585
		130.667	0.63129				130.667	0.94991
		133.333	0.61943				133.333	0.94361
		136	0.60756				136	0.93698
		138.667	0.59569				138.667	0.93002
		141.333	0.58382				141.333	0.92274
		144	0.57198				144	0.91515
		146.667	0.56016				146.667	0.90725
		149.333	0.54837				149.333	0.89906
		152	0.53663				152	0.89058
		154.667	0.52493				154.667	0.88182
		157.333	0.5133				157.333	0.8728
		160	0.50173				160	0.86352
		162.667	0.49023				162.667	0.854
		165.333	0.47881				165.333	0.84424
		168	0.46748				168	0.83425
		170.667	0.45625				170.667	0.82405
		173.333	0.44511				173.333	0.81364
		176	0.43408				176	0.80304
		178.667	0.42316				178.667	0.79226
		181.333	0.41235				181.333	0.78131
		184	0.40167				184	0.77019
		186.667	0.39111				186.667	0.75893
		189.333	0.38069				189.333	0.74754
		192	0.3704				192	0.73601
		194.667	0.36025				194.667	0.72437
		197.333	0.35025				197.333	0.71263
		200	0.34039				200	0.70079
		202.667	0.33069				202.667	0.68887
		205.333	0.32113				205.333	0.67688
		208	0.31174				208	0.66483
		210.667	0.3025				210.667	0.65273
		213.333	0.29343				213.333	0.6406
		216	0.28451				216	0.62843
		218.667	0.27577				218.667	0.61625
		221.333	0.26718				221.333	0.60405
		224	0.25877				224	0.59186
		226.667	0.25053				226.667	0.57969
		229.333	0.24245				229.333	0.56753
		232	0.23455				232	0.5554
		234.667	0.22682				234.667	0.54332
		237.333	0.21925				237.333	0.53128
		240	0.21186				240	0.51929
		242.667	0.20464				242.667	0.50738
		245.333	0.19759				245.333	0.49553
		248	0.19071				248	0.48377
		250.667	0.184				250.667	0.4721
		253.333	0.17746				253.333	0.46052
		256	0.17108				256	0.44904
		258.667	0.16487				258.667	0.43768
		261.333	0.15882				261.333	0.42642
		264	0.15294				264	0.41529
		266.667	0.14722				266.667	0.40429
		269.333	0.14166				269.333	0.39342
		272	0.13625				272	0.38269
		274.667	0.13101				274.667	0.3721
		277.333	0.12591				277.333	0.36165
		280	0.12097				280	0.35136
		282.667	0.11618				282.667	0.34122
		285.333	0.11153				285.333	0.33124
		288	0.10703				288	0.32143
		290.667	0.10267				290.667	0.31177
		293.333	0.09846				293.333	0.30229
		296	0.09437				296	0.29298
		298.667	0.09043				298.667	0.28383
		301.333	0.08661				301.333	0.27487
		304	0.08293				304	0.26607
		306.667	0.07937				306.667	0.25746
		309.333	0.07593				309.333	0.24902
		312	0.07262				312	0.24076
		314.667	0.06942				314.667	0.23269
		317.333	0.06634				317.333	0.22479
		320	0.06337				320	0.21707
		322.667	0.06051				322.667	0.20953
		325.333	0.05776				325.333	0.20218
		328	0.05511				328	0.195
		330.667	0.05256				330.667	0.188
		333.333	0.05011				333.333	0.18118
		336	0.04776				336	0.17454
		338.667	0.0455				338.667	0.16807
		341.333	0.04333				341.333	0.16177
		344	0.04125				344	0.15565
		346.667	0.03925				346.667	0.1497
		349.333	0.03734				349.333	0.14392
		352	0.0355				352	0.13831
		354.667	0.03375				354.667	0.13286
		357.333	0.03206				357.333	0.12758
		360	0.03045				360	0.12245
		362.667	0.02891				362.667	0.11749
		365.333	0.02744				365.333	0.11268
		368	0.02603				368	0.10802
		370.667	0.02468				370.667	0.10351
		373.333	0.0234				373.333	0.09915
		376	0.02217				376	0.09494
		378.667	0.021				378.667	0.09087
		381.333	0.01989				381.333	0.08694
		384	0.01882				384	0.08314
		386.667	0.01781				386.667	0.07948
		389.333	0.01684				389.333	0.07595
		392	0.01592				392	0.07255
		394.667	0.01505				394.667	0.06927
		397.333	0.01422				397.333	0.06611
		400	0.01343				400	0.06307
		402.667	0.01267				402.667	0.06015
		405.333	0.01196				405.333	0.05734
		408	0.01128				408	0.05464
		410.667	0.01064				410.667	0.05204
		413.333	0.01002				413.333	0.04955
		416	0.00944				416	0.04716
		418.667	0.00889				418.667	0.04486
		421.333	0.00837				421.333	0.04266
		424	0.00788				424	0.04055
		426.667	0.00741				426.667	0.03853
		429.333	0.00697				429.333	0.0366
		432	0.00655				432	0.03475
		434.667	0.00616				434.667	0.03298
		437.333	0.00578				437.333	0.03128
		440	0.00543				440	0.02966
		442.667	0.0051				442.667	0.02812
		445.333	0.00478				445.333	0.02664
		448	0.00448				448	0.02523
		450.667	0.0042				450.667	0.02389
		453.333	0.00394				453.333	0.02261
		456	0.00369				456	0.02139
		458.667	0.00346				458.667	0.02022
		461.333	0.00323				461.333	0.01911
		464	0.00303				464	0.01806
		466.667	0.00283				466.667	0.01706
		469.333	0.00265				469.333	0.0161
		472	0.00247				472	0.0152
		474.667	0.00231				474.667	0.01433
		477.333	0.00216				477.333	0.01352
		480	0.00201				480	0.01274
		482.667	0.00188				482.667	0.012
		485.333	0.00175				485.333	0.0113
		488	0.00164				488	0.01064
		490.667	0.00152				490.667	0.01001
		493.333	0.00142				493.333	0.00942
		496	0.00132				496	0.00886
		498.667	0.00123				498.667	0.00832
		501.333	0.00115				501.333	0.00782
		504	0.00107				504	0.00734
		506.667	0.000991641				506.667	0.00689
		509.333	0.000921836				509.333	0.00647
		512	0.000856617				512	0.00607
		514.667	0.000795708				514.667	0.00569
		517.333	0.000738846				517.333	0.00533
		520	0.000685785				520	0.005
		522.667	0.00063629				522.667	0.00468
		525.333	0.000590142				525.333	0.00438
		528	0.00054713				528	0.0041
		530.667	0.00050706				530.667	0.00383
		533.333	0.000469744				533.333	0.00358
		536	0.000435007				536	0.00335
		538.667	0.000402685				538.667	0.00313
		541.333	0.000372621				541.333	0.00292
		544	0.00034467				544	0.00273
		546.667	0.000318694				546.667	0.00254
		549.333	0.000294562				549.333	0.00237
		552	0.000272154				552	0.00221
		554.667	0.000251353				554.667	0.00206
		557.333	0.000232054				557.333	0.00192
		560	0.000214154				560	0.00179
		562.667	0.000197559				562.667	0.00166
		565.333	0.000182181				565.333	0.00155
		568	0.000167935				568	0.00144
		570.667	0.000154744				570.667	0.00134
		573.333	0.000142534				573.333	0.00124
		576	0.000131238				576	0.00116
		578.667	0.00012079				578.667	0.00107
		581.333	0.000111132				581.333	0.000996353
		584	0.000102206				584	0.000924414
		586.667	9.4e-05				586.667	0.000857324
		589.333	8.63e-05				589.333	0.000794781
		592	7.93e-05				592	0.000736503
		594.667	7.28e-05				594.667	0.000682223
		597.333	6.69e-05				597.333	0.000631687
		600	6.14e-05				600	0.000584659
		602.667	5.63e-05				602.667	0.000540914
		605.333	5.16e-05				605.333	0.000500239
		608	4.73e-05				608	0.000462436
		610.667	4.33e-05				610.667	0.000427317
		613.333	3.97e-05				613.333	0.000394706
		616	3.63e-05				616	0.000364436
		618.667	3.32e-05				618.667	0.000336351
		621.333	3.04e-05				621.333	0.000310306
		624	2.78e-05				624	0.000286161
		626.667	2.54e-05				626.667	0.000263789
		629.333	2.32e-05				629.333	0.000243067
		632	2.12e-05				632	0.000223883
		634.667	1.94e-05				634.667	0.00020613
		637.333	1.77e-05				637.333	0.000189707
		640	1.61e-05				640	0.000174523
		642.667	1.47e-05				642.667	0.000160489
		645.333	1.34e-05				645.333	0.000147524
		648	1.22e-05				648	0.000135551
		650.667	1.11e-05				650.667	0.0001245
		653.333	1.01e-05				653.333	0.000114304
		656	9.22e-06				656	0.0001049
		658.667	8.39e-06				658.667	9.62e-05
		661.333	7.63e-06				661.333	8.82e-05
		664	6.94e-06				664	8.09e-05
		666.667	6.31e-06				666.667	7.41e-05
		669.333	5.73e-06				669.333	6.79e-05
		672	5.2e-06				672	6.21e-05
		674.667	4.72e-06				674.667	5.69e-05
		677.333	4.29e-06				677.333	5.2e-05
		680	3.89e-06				680	4.76e-05
		682.667	3.53e-06				682.667	4.35e-05
		685.333	3.2e-06				685.333	3.97e-05
		688	2.89e-06				688	3.63e-05
		690.667	2.62e-06				690.667	3.31e-05
		693.333	2.37e-06				693.333	3.02e-05
		696	2.15e-06				696	2.76e-05
		698.667	1.94e-06				698.667	2.51e-05
		701.333	1.76e-06				701.333	2.29e-05
		704	1.59e-06				704	2.09e-05
		706.667	1.44e-06				706.667	1.9e-05
		709.333	1.3e-06				709.333	1.73e-05
		712	1.17e-06				712	1.57e-05
		714.667	1.06e-06				714.667	1.43e-05
		717.333	9.53e-07				717.333	1.3e-05
		720	8.6e-07				720	1.18e-05

## Sheet: Figure. 1C
position (nm)	normalized position distribution probability of GFP-MCAK	position (nm)	Gaussian fit to the position distribution probability of GFP-MCAK
-360	0	-360	0.00457
-280	0	-352.727	0.00457
-200	0	-345.455	0.00457
-120	0.0144	-338.182	0.00457
-40	0.05759	-330.909	0.00457
40	0.31672	-323.636	0.00457
120	0.87816	-316.364	0.00457
200	0.80617	-309.091	0.00457
280	0.10077	-301.818	0.00457
360	0.0144	-294.545	0.00457
		-287.273	0.00457
		-280	0.00457
		-272.727	0.00457
		-265.455	0.00457
		-258.182	0.00457
		-250.909	0.00457
		-243.636	0.00457
		-236.364	0.00457
		-229.091	0.00457
		-221.818	0.00457
		-214.545	0.00457
		-207.273	0.00457
		-200	0.0046
		-192.727	0.0046
		-185.455	0.0046
		-178.182	0.0046
		-170.909	0.0046
		-163.636	0.00462
		-156.364	0.00464
		-149.091	0.00466
		-141.818	0.0047
		-134.545	0.00477
		-127.273	0.00488
		-120	0.00503
		-112.727	0.00527
		-105.455	0.0056
		-98.1818	0.00611
		-90.9091	0.00678
		-83.6364	0.00775
		-76.3636	0.0091
		-69.0909	0.01094
		-61.8182	0.01344
		-54.5455	0.01676
		-47.2727	0.02116
		-40	0.02689
		-32.7273	0.03429
		-25.4546	0.04368
		-18.1818	0.05547
		-10.9091	0.07009
		-3.63636	0.08794
		3.63636	0.10952
		10.9091	0.13519
		18.1818	0.16532
		25.4546	0.2002
		32.7273	0.24002
		40	0.28477
		47.2727	0.33431
		54.5455	0.38832
		61.8182	0.44617
		69.0909	0.50711
		76.3636	0.57009
		83.6364	0.63385
		90.9091	0.69705
		98.1818	0.75807
		105.455	0.81536
		112.727	0.86729
		120	0.91232
		127.273	0.94908
		134.545	0.97639
		141.818	0.99335
		149.091	0.99941
		156.364	0.99435
		163.636	0.97836
		170.909	0.95197
		178.182	0.91602
		185.455	0.87168
		192.727	0.82031
		200	0.76346
		207.273	0.70269
		214.545	0.63963
		221.818	0.57586
		229.091	0.51276
		236.364	0.4516
		243.636	0.39341
		250.909	0.33904
		258.182	0.28906
		265.455	0.24387
		272.727	0.20361
		280	0.16827
		287.273	0.13772
		294.545	0.11166
		301.818	0.08976
		309.091	0.07155
		316.364	0.05667
		323.636	0.04464
		330.909	0.03505
		338.182	0.02748
		345.455	0.02162
		352.727	0.01711
		360	0.0137

## Sheet: Figure. 1D
kon (×10-6, s-1 nM-1tubulin dimer-1)			p value of two-tailed Mann_x0002_Whitney U test with Bonferroni correction
end	lattice		end<-> lattice:p< 0.001
13.1492	1.2893
15.8095	1.13372
16.3508	0.63704
40.6431	4.70238
13.024	0.56031
10.36	2.47825
7.04908	1.16638
13.9543	1.61011
10.8533	1.25435
17.094	1.11634
4.5584	0.25235
13.6752	6.08643
24.9688	1.77293
13.6752	0.41863
13.6752	1.76184
8.01282	0.83991
19.98	1.88768
32.8205	2.69021
21.5924	2.56517
9.36658	2.53746
31.5327	6.68213
32.967	2.67517
28.49	2.05083
20.537	2.49533
14.8148	0.43094
40.7	10.3982
20.5128	1.85165
23.9916	8.5037
25.5135	11.4384
20.8782	3.82416
11.8709	8.3612
23.9316	1.50502
16.28	2.86172
3.92966	0.61947
17.094	0.95097
32.2887	2.97287
29.6296	2.95385
12.5356	1.76545
17.094	2.00669
40.2212	4.01443
7.09295	1.95468
12.6622	0.45229
18.5357	1.94989
30.6402	0.61257
26.2985	0.59671
25.0156	2.76702
16.9248	4.14493
17.3837	1.78338
7.02494	0.62173
24.5796	0.65213
20.328	0.73861
21.978	3.77903
28.3086	1.44548
55.5903	5.75072
43.956	3.55835
34.9181	4.76156
35.3669	4.51493
41.8843	3.85526
35.1247	2.8576
52.3453	4.14536
21.5358	2.7836
38.5994	5.2582
32.2529	3.62845
27.3504	1.76665
21.4633	2.19511
11.0731	0.9382

## Sheet: Figure. 1E
RE/L
50.0194
44.0727
37.6912
34.3778
32.6667
27.9959
27.5218
25.6667
23.2441
19.5843
18.0635
17.9753
15.9012
15.4815
15.3125
14.0833
13.9448
13.892
12.6274
12.3529
12.3233
12.2917
12.2
11.8025
11.2991
11.0781
10.8642
10.8611
10.5844
10.1987
10.0309
10.0192
9.77778
9.74765
9.66667
9.5401
9.50602
9.04065
8.88889
8.66667
8.65256
8.6431
8.51852
8.41754
8.23016
7.83333
7.7619
7.73666
7.3408
7.33333
7.10053
6.34355
6.04353
5.81579
5.68889
5.45954
4.71895
4.18038
4.08324
3.91414
3.69132
3.62871
2.82131
2.24684
2.23051
1.41975

## Sheet: Figure. 1F
dwell time (s)			p value of two-tailed Mann_x0002_Whitney U test with Bonferroni correction
end	lattice		end<-> lattice:p< 0.001
3.11	3.38
2.34	3.2
2.23	2.88
2.2	2.67
2	2.2
1.97	2.2
1.95	1.99
1.95	1.7
1.93	1.7
1.9	1.53
1.85	1.52
1.85	1.5
1.85	1.45
1.83	1.37
1.78	1.35
1.75	1.23
1.63	1.1
1.6	1.03
1.49	0.98
1.48	0.97
1.43	0.92
1.4	0.92
1.4	0.9
1.34	0.9
1.34	0.9
1.3	0.88
1.3	0.87
1.26	0.83
1.23	0.81
1.2	0.8
1.2	0.78
1.19	0.78
1.18	0.75
1.15	0.75
1.13	0.73
1.13	0.73
1.13	0.73
1.12	0.72
1.1	0.7
1.1	0.7
1.1	0.68
1.1	0.62
1.07	0.62
1.07	0.61
1.07	0.6
1.07	0.6
1.05	0.6
1.05	0.58
1.03	0.55
1.03	0.55
1.03	0.54
1.02	0.53
1	0.53
1	0.52
1	0.51
0.97	0.5
0.97	0.5
0.95	0.5
0.93	0.5
0.93	0.48
0.9	0.48
0.9	0.48
0.9	0.45
0.88	0.45
0.88	0.45
0.88	0.44
0.86	0.44
0.83	0.44
0.82	0.43
0.8	0.43
0.8	0.43
0.8	0.42
0.8	0.4
0.8	0.4
0.8	0.4
0.8	0.39
0.79	0.38
0.78	0.38
0.78	0.38
0.78	0.38
0.78	0.38
0.78	0.36
0.78	0.35
0.77	0.35
0.76	0.35
0.75	0.34
0.75	0.33
0.73	0.33
0.73	0.33
0.73	0.33
0.73	0.33
0.73	0.33
0.72	0.33
0.72	0.33
0.72	0.33
0.7	0.32
0.7	0.31
0.7	0.3
0.7	0.3
0.7	0.3
0.7	0.3
0.7	0.28
0.7	0.28
0.69	0.28
0.68	0.28
0.67	0.27
0.67	0.27
0.67	0.27
0.67	0.27
0.67	0.27
0.65	0.26
0.65	0.26
0.65	0.25
0.63	0.25
0.6	0.25
0.6	0.25
0.6	0.25
0.6	0.23
0.58	4
0.58	3.4
0.57	3.25
0.55	2.875
0.55	2.4
0.55	1.8833
0.55	1.8125
0.55	1.6667
0.54	1.4
0.53	1.4
0.52	1.375
0.5	1.2
0.5	1.1833
0.5	1.15
0.5	1.1167
0.5	1.1167
0.5	1.0667
0.5	1.0667
0.49	1.0667
0.48	1
0.48	0.9667
0.48	0.95
0.48	0.925
0.48	0.9167
0.47	0.9
0.45	0.875
0.45	0.85
0.45	0.85
0.45	0.8333
0.45	0.8167
0.45	0.8167
0.45	0.8
0.45	0.8
0.45	0.7833
0.44	0.7833
0.44	0.7667
0.43	0.75
0.43	0.75
0.43	0.75
0.43	0.75
0.43	0.75
0.43	0.7
0.43	0.7
0.43	0.6833
0.43	0.6833
0.41	0.675
0.41	0.675
0.41	0.6667
0.4	0.6667
0.4	0.65
0.4	0.6333
0.4	0.6333
0.4	0.6333
0.4	0.625
0.4	0.6167
0.4	0.6
0.4	0.6
0.4	0.575
0.4	0.575
0.4	0.575
0.39	0.575
0.39	0.5667
0.38	0.5667
0.38	0.5667
0.38	0.55
0.38	0.55
0.38	0.55
0.38	0.55
0.38	0.55
0.37	0.55
0.37	0.5333
0.37	0.5333
0.37	0.5167
0.37	0.5
0.36	0.5
0.36	0.5
0.36	0.5
0.35	0.5
0.35	0.5
0.35	0.5
0.35	0.5
0.35	0.4917
0.35	0.4833
0.35	0.4833
0.34	0.4833
0.34	0.475
0.33	0.4667
0.33	0.4667
0.33	0.4667
0.33	0.4667
0.33	0.4667
0.33	0.45
0.33	0.45
0.33	0.45
0.33	0.45
0.32	0.45
0.32	0.45
0.32	0.4417
0.31	0.4333
0.3	0.4333
0.3	0.4333
0.3	0.4333
0.3	0.425
0.3	0.425
0.3	0.425
0.29	0.4167
0.29	0.4167
0.28	0.4167
0.28	0.4167
0.28	0.4125
0.27	0.4
0.27	0.4
0.26	0.4
0.26	0.4
0.25	0.4
0.25	0.4
0.25	0.4
0.25	0.4
0.25	0.4
0.23	0.4
0.2167	0.4
0.2167	0.4
0.2333	0.3833
0.2333	0.3833
0.2333	0.3833
0.2333	0.3833
0.2375	0.375
0.2417	0.375
0.2417	0.375
0.25	0.375
0.25	0.375
0.25	0.3667
0.25	0.3667
0.2583	0.3667
0.2667	0.3625
0.2667	0.35
0.2667	0.35
0.2667	0.35
0.2667	0.35
0.2667	0.35
0.2833	0.35
0.2833	0.35
0.2833	0.35
0.3	0.35
0.3	0.3417
0.3	0.3417
0.3	0.3375
0.3	0.3333
0.3	0.3333
0.3	0.3333
0.3167	0.3333
0.3167	0.3333
0.3167	0.3333
0.3167	0.3333
0.3167	0.3333
0.3167	0.325
0.3208	0.325
0.325	0.325
0.325	0.325
0.325	0.325
0.3333	0.325
0.3333	0.325
0.3333	0.325
0.3333	0.3167
0.3333	0.3167
0.3333	0.3167
0.3375	0.3167
0.35	0.3167
0.35	0.3167
0.35	0.3167
0.35	0.3167
0.35	0.3125
0.35	0.3
0.35	0.3
0.35	0.3
0.35	0.3
0.35	0.3
0.35	0.3
0.3625	0.2833
0.3667	0.2833
0.3667	0.2833
0.375	0.2833
0.375	0.2833
0.3833	0.2833
0.3833	0.2833
0.3833	0.2833
0.4	0.2833
0.4	0.275
0.4	0.275
0.4	0.275
0.4	0.275
0.4	0.275
0.4	0.275
0.4	0.275
0.4	0.2667
0.4	0.2667
0.4125	0.2667
0.4125	0.2667
0.4167	0.2667
0.4167	0.2667
0.4167	0.2625
0.4167	0.2625
0.4167	0.2625
0.4167	0.2583
0.4167	0.25
0.425	0.25
0.425	0.25
0.425	0.25
0.425	0.25
0.425	0.25
0.425	0.25
0.4292	0.25
0.4333	0.25
0.4333	0.2375
0.4333	0.2333
0.4333	0.2333
0.4333	0.2333
0.4333	0.2333
0.45	0.2333
0.45	0.2333
0.45	0.2292
0.45	0.225
0.45	0.225
0.45	0.2167
0.4583	0.2167
0.4667	0.2167
0.475	0.2167
0.475	0.225
0.475	0.225
0.4833	0.225
0.4875	0.225
0.5	0.2333
0.5	0.2333
0.5	0.25
0.5	0.25
0.5	0.25
0.5	0.25
0.5	0.25
0.525	0.25
0.525	0.25
0.525	0.25
0.5292	0.25
0.5333	0.25
0.5333	0.25
0.5417	0.25
0.55	0.25
0.55	0.2667
0.55	0.2667
0.55	0.2667
0.55	0.2667
0.5667	0.2667
0.5667	0.2667
0.5667	0.2667
0.575	0.2667
0.5833	0.2667
0.5833	0.275
0.5833	0.275
0.5833	0.275
0.6	0.275
0.6	0.275
0.6125	0.275
0.6167	0.275
0.6167	0.275
0.6167	0.2833
0.6167	0.2833
0.625	0.2833
0.625	0.2833
0.625	0.2875
0.625	0.3
0.6333	0.3
0.6333	0.3
0.6333	0.3
0.6333	0.3
0.6375	0.3
0.65	0.3
0.65	0.3
0.65	0.3
0.65	0.3
0.6583	0.3
0.6667	0.3
0.7	0.3
0.7	0.3
0.7	0.3
0.7	0.3
0.7125	0.3
0.7167	0.3
0.7208	0.3
0.725	0.3125
0.725	0.3167
0.7333	0.325
0.7333	0.325
0.75	0.325
0.75	0.325
0.75	0.325
0.75	0.325
0.75	0.325
0.75	0.325
0.75	0.325
0.8	0.325
0.8	0.325
0.8083	0.325
0.8167	0.325
0.8167	0.325
0.8167	0.325
0.825	0.325
0.825	0.325
0.825	0.325
0.8333	0.325
0.8333	0.325
0.8333	0.3333
0.85	0.3333
0.85	0.3333
0.8583	0.3333
0.9	0.3333
0.9	0.3333
0.9167	0.3333
0.9167	0.3333
0.9167	0.3333
0.925	0.3333
0.9333	0.3333
0.9333	0.3375
0.9375	0.35
0.95	0.35
0.975	0.35
0.9875	0.35
1	0.35
1.025	0.35
1.05	0.35
1.05	0.35
1.05	0.35
1.0625	0.35
1.0667	0.35
1.075	0.35
1.075	0.35
1.0833	0.35
1.1	0.35
1.1	0.35
1.1	0.3667
1.1167	0.3667
1.125	0.3667
1.125	0.3667
1.125	0.3667
1.1333	0.3667
1.15	0.3667
1.15	0.375
1.175	0.375
1.175	0.375
1.175	0.375
1.1833	0.375
1.2	0.375
1.2	0.375
1.2	0.375
1.25	0.375
1.25	0.375
1.2583	0.375
1.2667	0.3833
1.3	0.3833
1.3167	0.3875
1.325	0.4
1.3333	0.4
1.35	0.4
1.4	0.4
1.4	0.4
1.425	0.4
1.55	0.4
1.6	0.4
1.6333	0.4
1.6833	0.4
1.8167	0.4
1.85	0.4
1.875	0.4
2	0.4
2.0583	0.4
2.0833	0.4
2.25	0.4167
2.5	0.4167
2.6875	0.4167
2.9	0.4208
2.9	0.425
3.2667	0.425
3.3875	0.425
0.225	0.425
0.225	0.425
0.2333	0.425
0.2333	0.425
0.2333	0.425
0.2333	0.425
0.2333	0.425
0.2333	0.425
0.25	0.425
0.25	0.425
0.25	0.4333
0.25	0.4333
0.25	0.4333
0.25	0.4333
0.25	0.45
0.25	0.45
0.25	0.45
0.25	0.45
0.25	0.45
0.25	0.45
0.2667	0.45
0.2667	0.45
0.2667	0.45
0.2667	0.45
0.275	0.45
0.275	0.45
0.275	0.45
0.275	0.45
0.275	0.4667
0.275	0.4667
0.275	0.4667
0.275	0.475
0.275	0.475
0.275	0.475
0.275	0.475
0.275	0.475
0.275	0.475
0.275	0.475
0.2833	0.475
0.2833	0.475
0.3	0.475
0.3	0.475
0.3	0.475
0.3	0.4833
0.3	0.5
0.3	0.5
0.3	0.5
0.3	0.5
0.3	0.5
0.3167	0.5
0.325	0.5
0.325	0.5
0.325	0.5
0.325	0.5
0.325	0.5
0.325	0.5167
0.325	0.525
0.325	0.525
0.325	0.525
0.325	0.525
0.325	0.525
0.325	0.525
0.325	0.5312
0.325	0.5333
0.325	0.5333
0.325	0.5333
0.325	0.55
0.325	0.55
0.325	0.55
0.325	0.55
0.325	0.55
0.3333	0.55
0.3333	0.55
0.3333	0.55
0.3333	0.55
0.3333	0.5667
0.3333	0.5667
0.3333	0.5667
0.3375	0.5667
0.35	0.5667
0.35	0.575
0.35	0.575
0.35	0.575
0.35	0.575
0.35	0.575
0.35	0.575
0.35	0.575
0.35	0.6
0.35	0.6
0.35	0.6
0.35	0.6
0.35	0.6
0.3667	0.6
0.3667	0.6
0.3667	0.6
0.375	0.6167
0.375	0.625
0.375	0.625
0.375	0.625
0.375	0.625
0.375	0.625
0.375	0.6333
0.4	0.6333
0.4	0.65
0.4	0.65
0.4	0.65
0.4	0.65
0.4	0.6667
0.4	0.6667
0.4	0.675
0.4	0.7
0.4	0.7
0.4	0.7
0.4	0.7
0.4	0.7
0.4	0.7
0.4	0.7
0.4	0.7167
0.4167	0.725
0.425	0.725
0.425	0.725
0.425	0.725
0.425	0.7333
0.425	0.7333
0.425	0.75
0.425	0.75
0.425	0.75
0.425	0.75
0.425	0.75
0.425	0.75
0.425	0.75
0.425	0.7667
0.425	0.775
0.4333	0.8
0.4333	0.8
0.4333	0.8
0.4375	0.8
0.45	0.8
0.45	0.825
0.45	0.825
0.45	0.825
0.45	0.875
0.45	0.875
0.45	0.9
0.45	0.9
0.45	0.9
0.45	0.925
0.45	0.925
0.4583	0.925
0.4625	0.9375
0.4667	0.9625
0.4667	0.9667
0.4667	0.9667
0.4667	0.975
0.4667	0.975
0.4667	0.975
0.4667	0.9774
0.4667	1
0.475	1.025
0.475	1.025
0.475	1.025
0.475	1.0333
0.475	1.05
0.475	1.05
0.475	1.075
0.475	1.1
0.475	1.1
0.475	1.1
0.475	1.125
0.475	1.15
0.475	1.175
0.5	1.175
0.5	1.2
0.5	1.2
0.5	1.2333
0.5	1.25
0.5	1.275
0.5	1.3
0.5	1.325
0.5	1.45
0.5	1.4667
0.5	1.4667
0.5	1.5001
0.5	1.575
0.5	1.7127
0.5	1.9
0.5	1.925
0.525	2.025
0.525	2.125
0.525	2.1333
0.525	2.325
0.525	2.425
0.525	2.45
0.525	2.525
0.525	2.575
0.5333	2.65
0.5333	2.675
0.5333	2.9
0.5333	2.9167
0.5333	2.9333
0.5333	2.95
0.55	3.35
0.55	4
0.55
0.55
0.55
0.55
0.55
0.55
0.55
0.55
0.55
0.55
0.5667
0.5667
0.5667
0.5667
0.575
0.575
0.575
0.575
0.575
0.575
0.6
0.6
0.6
0.6
0.6
0.6
0.6
0.6
0.6
0.6
0.6167
0.625
0.625
0.625
0.625
0.625
0.625
0.625
0.625
0.625
0.6333
0.6333
0.6333
0.6333
0.6333
0.65
0.65
0.65
0.65
0.65
0.65
0.65
0.65
0.65
0.6667
0.6667
0.6667
0.675
0.675
0.675
0.675
0.675
0.675
0.6917
0.7
0.7
0.7
0.7
0.7
0.7
0.7
0.7
0.7
0.7
0.7
0.7
0.7
0.725
0.725
0.725
0.725
0.725
0.725
0.7333
0.7333
0.7333
0.7333
0.7333
0.75
0.75
0.75
0.75
0.75
0.75
0.7667
0.7667
0.7667
0.775
0.775
0.775
0.775
0.775
0.775
0.8
0.8
0.8
0.8
0.8
0.8
0.8167
0.825
0.825
0.825
0.825
0.8333
0.85
0.85
0.85
0.85
0.85
0.85
0.85
0.85
0.8583
0.8667
0.8667
0.875
0.875
0.9
0.9
0.9
0.9
0.9
0.9
0.9
0.9167
0.925
0.925
0.925
0.925
0.925
0.9333
0.9333
0.9333
0.95
0.95
0.95
0.95
0.95
0.95
0.95
0.95
0.9667
0.9667
0.9667
0.975
0.975
0.975
0.975
0.975
0.9833
0.9833
1
1
1
1
1
1.025
1.025
1.0333
1.0333
1.0333
1.05
1.05
1.05
1.05
1.05
1.0583
1.0667
1.0667
1.0667
1.0667
1.075
1.075
1.075
1.1
1.1
1.1
1.1
1.1
1.1
1.125
1.125
1.1333
1.15
1.15
1.15
1.15
1.15
1.15
1.1667
1.1667
1.2
1.2
1.2
1.2
1.2
1.2
1.225
1.2667
1.2667
1.275
1.275
1.3
1.3
1.3
1.325
1.325
1.3333
1.375
1.4
1.4
1.4
1.425
1.4333
1.45
1.45
1.4667
1.475
1.5333
1.6
1.625
1.6333
1.675
1.7333
1.75
1.8
1.8
1.8333
1.85
1.85
1.8667
1.9667
2
2.025
2.0667
2.1
2.225
2.2333
2.25
2.25
2.275
2.4
2.475
2.5
2.6
2.6667
2.7833
2.875
3.1
3.1667
3.4
3.85
4

## Sheet: Figure. 1G
t (s)	MSD (mm2)	SEM (mm2)
0.1	0.00807	0.000855262
0.2	0.01256	0.0019
0.3	0.01682	0.00334
0.4	0.02238	0.00506
0.5	0.02783	0.00727
0.6	0.03147	0.00784
