# Supplementary material for: MCAK recognizes the nucleotide-dependent feature at growing microtubule ends
Source: eLife journal article supplement (doi:10.7554/elife.92958), 2023-11-17
Supplement: fig1-figsupp1-data1 [file supplementary Figure1 source data1.xlsx]

## Sheet: Figure. S1C-I
GFP-MCAK		GFP-MCAKK524A		GFP-MCAKV298S		MCAK-RFP		GFP-MCAKsN+M		EB1-GFP		XMAP215-GFP
elution volume (ml)	Abs280nm (mAU)	elution volume (ml)	Abs280nm (mAU)	elution volume (ml)	Abs280nm (mAU)	elution volume (ml)	Abs280nm (mAU)	elution volume (ml)	Abs280nm (mAU)	elution volume (ml)	Abs280nm (mAU)	elution volume (ml)	Abs280nm (mAU)
-0.000315	-0.29653	-0.000291	0.21988	-0.000326	0.00572	0.00102	-6.82996	-0.000313	-0.03613	-0.000312	-0.22091	-0.000638	-6.4e-05
-0.000148	-1.69645	-0.000125	0.21988	-0.00016	0.00599	0.00118	-6.40258	-0.000146	-0.37807	-0.000146	-1.26639	-0.000472	-6.4e-05
1.8e-05	-3.07969	4.1e-05	1.44359	7e-06	0.02376	0.00135	-5.96074	2e-05	-0.69483	2.1e-05	-2.20346	-0.000305	0.01138
0.000185	-0.21728	0.000208	0.27206	0.000173	0.00586	0.00152	-5.52222	0.000187	-0.59267	0.000187	-0.03452	-0.000139	0.03641
0.000351	-0.3832	0.000374	0.45787	0.00034	0.02885	0.00168	-5.08472	0.000353	-0.21077	0.000354	-0.05993	2.8e-05	0.30878
0.000518	-0.54306	0.000541	0.66334	0.000506	0.06985	0.00185	-4.63246	0.00052	-0.35371	0.00052	-0.08457	0.000194	0.40569
0.000684	-0.63208	0.000707	0.76143	0.000673	0.10721	0.00202	-4.17268	0.000686	-0.49147	0.000687	-0.05609	0.00036	0.4866
0.00085	-0.64287	0.000874	0.89057	0.000839	0.14415	0.00218	-3.73101	0.000852	-0.61506	0.000853	0.02881	0.000527	0.56755
0.00102	-0.65462	0.00104	1.11645	0.00101	0.186	0.00235	-3.2973	0.00102	-0.72003	0.00102	0.11356	0.000693	0.64647
0.00118	-0.66627	0.00121	1.33962	0.00117	0.23155	0.00251	-2.86312	0.00119	-0.82105	0.00119	0.1991	0.00086	0.725
0.00135	-0.67794	0.00137	1.56596	0.00134	0.27938	0.00268	-2.42352	0.00135	-0.92334	0.00135	0.28644	0.00103	0.80577
0.00152	-0.68963	0.00154	1.80267	0.00151	0.32618	0.00285	-1.98475	0.00152	-1.0301	0.00152	0.37323	0.00119	0.88816
0.00168	-0.70132	0.00171	2.03922	0.00167	0.37275	0.00301	-1.54811	0.00169	-1.13282	0.00169	0.45856	0.00136	0.97031
0.00185	-0.71299	0.00187	2.27014	0.00184	0.4188	0.00318	-1.10469	0.00185	-1.23544	0.00185	0.54399	0.00153	1.05097
0.00202	-0.72492	0.00204	2.50442	0.00201	0.46343	0.00335	-0.6627	0.00202	-1.33777	0.00202	0.63032	0.00169	1.13295
0.00218	-0.73664	0.00221	2.74454	0.00217	0.50774	0.00351	-0.22225	0.00218	-1.43979	0.00218	0.71673	0.00186	1.21308
0.00235	-0.74804	0.00237	2.97941	0.00234	0.5526	0.00368	0.20871	0.00235	-1.54132	0.00235	0.80206	0.00203	1.29339
0.00252	-0.75896	0.00254	3.21603	0.0025	0.59741	0.00385	0.63401	0.00252	-1.64251	0.00252	0.88721	0.00219	1.377
0.00268	-0.76973	0.00271	3.44543	0.00267	0.63803	0.00401	1.06033	0.00268	-1.74551	0.00268	0.97346	0.00236	1.44795
0.00285	-0.78096	0.00287	3.56563	0.00284	0.67752	0.00418	1.29561	0.00285	-1.85037	0.00285	1.05969	0.00252	1.5044
0.00301	-0.79222	0.00304	3.6242	0.003	0.71814	0.00435	1.31797	0.00302	-1.95518	0.00302	1.14393	0.00269	1.55968
0.00318	-0.80292	0.0032	3.68368	0.00317	0.75793	0.00451	1.31926	0.00318	-2.05611	0.00318	1.22725	0.00286	1.61444
0.00335	-0.81346	0.00337	3.74315	0.00334	0.79765	0.00468	1.32185	0.00335	-2.15915	0.00335	1.312	0.00302	1.6683
0.00351	-0.82418	0.00354	3.80062	0.0035	0.83734	0.00485	1.32451	0.00352	-2.26162	0.00352	1.39642	0.00319	1.72195
0.00368	-0.83475	0.0037	3.85923	0.00367	0.8769	0.00501	1.32436	0.00368	-2.36435	0.00368	1.47987	0.00336	1.77369
0.00385	-0.84509	0.00387	3.91626	0.00384	0.91632	0.00518	1.32253	0.00385	-2.46654	0.00385	1.56316	0.00352	1.8257
0.00401	-0.85416	0.00404	3.97312	0.004	0.95711	0.00535	1.32695	0.00402	-2.54555	0.00402	1.64765	0.00369	1.87861
0.00418	-0.86051	0.0042	4.02936	0.00417	0.99779	0.00551	1.33878	0.00418	-2.57336	0.00418	1.68437	0.00386	1.93164
0.00435	-0.86099	0.00437	4.087	0.00434	1.03597	0.00568	1.34691	0.00435	-2.56897	0.00435	1.68188	0.00402	1.9848
0.00451	-0.85799	0.00454	4.14278	0.0045	1.05403	0.00584	1.34661	0.00451	-2.56434	0.00452	1.67917	0.00419	2.0191
0.00468	-0.85518	0.0047	4.16906	0.00467	1.05696	0.00601	1.34386	0.00468	-2.55948	0.00468	1.67583	0.00436	2.02954
0.00485	-0.85269	0.00487	4.17984	0.00484	1.05985	0.00618	1.34288	0.00485	-2.55675	0.00485	1.67233	0.00452	2.03158
0.00501	-0.85001	0.00504	4.19064	0.005	1.0627	0.00634	1.34407	0.00501	-2.5563	0.00501	1.6691	0.00469	2.03293
0.00518	-0.84709	0.0052	4.20168	0.00517	1.0637	0.00651	1.35175	0.00518	-2.5563	0.00518	1.66597	0.00485	2.03384
0.00534	-0.84412	0.00537	4.21077	0.00534	1.06148	0.00668	1.36437	0.00535	-2.55622	0.00535	1.66435	0.00502	2.03376
0.00551	-0.84018	0.00553	4.21505	0.0055	1.05785	0.00684	1.37647	0.00551	-2.55604	0.00551	1.66459	0.00519	2.03294
0.00568	-0.83537	0.0057	4.21737	0.00567	1.05413	0.00701	1.38841	0.00568	-2.5555	0.00568	1.66522	0.00535	2.03211
0.00584	-0.83052	0.00587	4.21947	0.00583	1.05019	0.00718	1.39966	0.00585	-2.55473	0.00585	1.66571	0.00552	2.03125
0.00601	-0.82577	0.00603	4.22114	0.006	1.04751	0.00734	1.41024	0.00601	-2.55365	0.00601	1.66615	0.00569	2.03043
0.00618	-0.82085	0.0062	4.22072	0.00617	1.0459	0.00751	1.42092	0.00618	-2.55213	0.00618	1.66635	0.00585	2.02979
0.00634	-0.81484	0.00637	4.21832	0.00633	1.04435	0.00768	1.433	0.00635	-2.55065	0.00635	1.66647	0.00602	2.02924
0.00651	-0.80832	0.00653	4.21544	0.0065	1.04244	0.00784	1.44659	0.00651	-2.54946	0.00651	1.66702	0.00619	2.02903
0.00668	-0.80208	0.0067	4.21217	0.00667	1.04068	0.00801	1.4661	0.00668	-2.54836	0.00668	1.66781	0.00635	2.02912
0.00684	-0.79598	0.00687	4.20855	0.00683	1.03994	0.00818	1.48951	0.00685	-2.54566	0.00685	1.66901	0.00652	2.02805
0.00701	-0.78997	0.00703	4.20467	0.007	1.03977	0.00834	1.51379	0.00701	-2.54171	0.00701	1.67096	0.00669	2.02594
0.00718	-0.78379	0.0072	4.2006	0.00717	1.03988	0.00851	1.54002	0.00718	-2.53732	0.00718	1.6736	0.00685	2.02393
0.00734	-0.77782	0.00737	4.19587	0.00733	1.04037	0.00868	1.56674	0.00734	-2.53265	0.00734	1.67708	0.00702	2.02307
0.00751	-0.77207	0.00753	4.19016	0.0075	1.04089	0.00884	1.59204	0.00751	-2.52813	0.00751	1.68089	0.00718	2.02306
0.00768	-0.76645	0.0077	4.18447	0.00767	1.0413	0.00901	1.61656	0.00768	-2.52439	0.00768	1.68413	0.00735	2.02428
0.00784	-0.76084	0.00786	4.17964	0.00783	1.04166	0.00917	1.638	0.00784	-2.52099	0.00784	1.6871	0.00752	2.0261
0.00801	-0.75548	0.00803	4.175	0.008	1.04245	0.00934	1.65533	0.00801	-2.51763	0.00801	1.69004	0.00768	2.0276
0.00817	-0.75159	0.0082	4.16947	0.00817	1.04353	0.00951	1.66459	0.00818	-2.51425	0.00818	1.69299	0.00785	2.02868
0.00834	-0.74848	0.00836	4.16336	0.00833	1.04427	0.00967	1.66614	0.00834	-2.51041	0.00834	1.69643	0.00802	2.02949
0.00851	-0.745	0.00853	4.15772	0.0085	1.04485	0.00984	1.66585	0.00851	-2.50614	0.00851	1.70114	0.00818	2.03018
0.00867	-0.74116	0.0087	4.15251	0.00866	1.04572	0.01001	1.66542	0.00868	-2.50191	0.00868	1.70661	0.00835	2.03081
0.00884	-0.73682	0.00886	4.14753	0.00883	1.04719	0.01017	1.66494	0.00884	-2.49786	0.00884	1.71277	0.00852	2.03086
0.00901	-0.73217	0.00903	4.14268	0.009	1.04889	0.01034	1.66232	0.00901	-2.49394	0.00901	1.71928	0.00868	2.03061
0.00917	-0.72751	0.0092	4.13795	0.00916	1.05065	0.01051	1.65849	0.00918	-2.48834	0.00918	1.72668	0.00885	2.03111
0.00934	-0.72179	0.00936	4.13315	0.00933	1.05244	0.01067	1.65778	0.00934	-2.48175	0.00934	1.73497	0.00902	2.03194
0.00951	-0.71555	0.00953	4.12803	0.0095	1.05392	0.01084	1.66314	0.00951	-2.47549	0.00951	1.74159	0.00918	2.03259
0.00967	-0.71027	0.0097	4.12233	0.00966	1.0551	0.01101	1.67135	0.00968	-2.46919	0.00967	1.74666	0.00935	2.03281
0.00984	-0.7057	0.00986	4.11564	0.00983	1.05636	0.01117	1.68032	0.00984	-2.46279	0.00984	1.75124	0.00951	2.03288
0.01001	-0.70132	0.01003	4.10909	0.01	1.05771	0.01134	1.68945	0.01001	-2.45653	0.01001	1.75628	0.00968	2.033
0.01017	-0.697	0.01019	4.10291	0.01016	1.0592	0.01151	1.70238	0.01017	-2.45053	0.01017	1.76164	0.00985	2.03312
0.01034	-0.69302	0.01036	4.09681	0.01033	1.0619	0.01167	1.71841	0.01034	-2.44489	0.01034	1.76705	0.01001	2.035
0.0105	-0.69012	0.01053	4.09238	0.0105	1.0653	0.01184	1.73377	0.01051	-2.43951	0.01051	1.77273	0.01018	2.03816
0.01067	-0.68765	0.01069	4.08871	0.01066	1.06913	0.01201	1.74795	0.01067	-2.4342	0.01067	1.77837	0.01035	2.04115
0.01084	-0.68527	0.01086	4.08561	0.01083	1.07304	0.01217	1.76633	0.01084	-2.42875	0.01084	1.78359	0.01051	2.04387
0.011	-0.68297	0.01103	4.08275	0.011	1.07638	0.01234	1.80415	0.01101	-2.42493	0.01101	1.78818	0.01068	2.0464
0.01117	-0.68076	0.01119	4.08054	0.01116	1.07873	0.0125	1.85104	0.01117	-2.42233	0.01117	1.79213	0.01085	2.04817
0.01134	-0.67862	0.01136	4.07977	0.01133	1.08052	0.01267	1.89674	0.01134	-2.41998	0.01134	1.79585	0.01101	2.04943
0.0115	-0.67651	0.01153	4.08001	0.0115	1.08201	0.01284	1.94043	0.01151	-2.41829	0.01151	1.79884	0.01118	2.04943
0.01167	-0.67234	0.01169	4.08159	0.01166	1.08337	0.013	1.98584	0.01167	-2.41677	0.01167	1.80136	0.01135	2.04895
0.01184	-0.66709	0.01186	4.08365	0.01183	1.08427	0.01317	2.0331	0.01184	-2.41452	0.01184	1.8043	0.01151	2.04815
0.012	-0.66179	0.01203	4.08732	0.01199	1.0849	0.01334	2.0843	0.01201	-2.41191	0.012	1.80761	0.01168	2.04701
0.01217	-0.65644	0.01219	4.09324	0.01216	1.085	0.0135	2.13794	0.01217	-2.40817	0.01217	1.81107	0.01184	2.04619
0.01234	-0.65136	0.01236	4.10067	0.01233	1.08488	0.01367	2.1934	0.01234	-2.40299	0.01234	1.815	0.01201	2.04577
0.0125	-0.64663	0.01253	4.10855	0.01249	1.0852	0.01384	2.25007	0.0125	-2.39784	0.0125	1.81865	0.01218	2.04546
0.01267	-0.6424	0.01269	4.11648	0.01266	1.08672	0.014	2.30544	0.01267	-2.39333	0.01267	1.8211	0.01234	2.04461
0.01283	-0.63879	0.01286	4.12398	0.01283	1.08826	0.01417	2.3635	0.01284	-2.389	0.01284	1.82298	0.01251	2.04355
0.013	-0.63532	0.01302	4.13126	0.01299	1.08918	0.01434	2.4196	0.013	-2.38462	0.013	1.82469	0.01268	2.04313
0.01317	-0.63136	0.01319	4.13809	0.01316	1.08994	0.0145	2.47492	0.01317	-2.38034	0.01317	1.82636	0.01284	2.04297
0.01333	-0.62704	0.01336	4.14483	0.01333	1.09088	0.01467	2.53287	0.01334	-2.37777	0.01334	1.82696	0.01301	2.04226
0.0135	-0.62373	0.01352	4.1512	0.01349	1.09207	0.01484	2.58858	0.0135	-2.37586	0.0135	1.82671	0.01318	2.04046
0.01367	-0.62094	0.01369	4.1566	0.01366	1.09362	0.015	2.63782	0.01367	-2.37443	0.01367	1.82609	0.01334	2.03861
0.01383	-0.61839	0.01386	4.16264	0.01383	1.09539	0.01517	2.68372	0.01384	-2.37382	0.01384	1.82396	0.01351	2.03726
0.014	-0.6166	0.01402	4.16922	0.01399	1.09722	0.01534	2.72757	0.014	-2.37348	0.014	1.82115	0.01368	2.03599
0.01417	-0.615	0.01419	4.17629	0.01416	1.09903	0.0155	2.76544	0.01417	-2.37316	0.01417	1.818	0.01384	2.03643
0.01433	-0.61328	0.01436	4.18115	0.01433	1.10075	0.01567	2.79809	0.01434	-2.37285	0.01433	1.81474	0.01401	2.0379
0.0145	-0.61152	0.01452	4.18469	0.01449	1.10101	0.01583	2.82742	0.0145	-2.37301	0.0145	1.81168	0.01417	2.03749
0.01467	-0.61015	0.01469	4.18607	0.01466	1.10087	0.016	2.85686	0.01467	-2.37348	0.01467	1.80892	0.01434	2.03602
0.01483	-0.60922	0.01486	4.18692	0.01483	1.10044	0.01617	2.88942	0.01484	-2.374	0.01483	1.80646	0.01451	2.034
0.015	-0.6084	0.01502	4.18681	0.01499	1.0995	0.01633	2.91807	0.015	-2.37454	0.015	1.80421	0.01467	2.03051
0.01517	-0.60755	0.01519	4.17775	0.01516	1.09914	0.0165	2.92466	0.01517	-2.37482	0.01517	1.80208	0.01484	2.0268
0.01533	-0.60669	0.01535	4.16693	0.01532	1.09961	0.01667	2.92447	0.01533	-2.37412	0.01533	1.79973	0.01501	2.02373
0.0155	-0.60549	0.01552	4.15394	0.01549	1.10032	0.01683	2.9236	0.0155	-2.37288	0.0155	1.7973	0.01517	2.02101
0.01566	-0.60321	0.01569	4.14081	0.01566	1.10023	0.017	2.92147	0.01567	-2.37094	0.01567	1.79555	0.01534	2.01889
0.01583	-0.60095	0.01585	4.11762	0.01582	1.09975	0.01717	2.91771	0.01583	-2.36881	0.01583	1.79419	0.01551	2.01738
0.016	-0.60129	0.01602	4.08436	0.01599	1.09972	0.01733	2.91284	0.016	-2.3668	0.016	1.79281	0.01567	2.01637
0.01616	-0.60171	0.01619	4.04571	0.01616	1.09991	0.0175	2.90762	0.01617	-2.36481	0.01617	1.7907	0.01584	2.01563
0.01633	-0.60209	0.01635	4.0054	0.01632	1.10011	0.01767	2.91333	0.01633	-2.36414	0.01633	1.78808	0.01601	2.01498
0.0165	-0.60242	0.01652	3.96607	0.01649	1.10028	0.01783	2.92476	0.0165	-2.36482	0.0165	1.78486	0.01617	2.01438
0.01666	-0.60255	0.01669	3.90727	0.01666	1.09997	0.018	2.93663	0.01667	-2.36581	0.01666	1.78159	0.01634	2.01379
0.01683	-0.60231	0.01685	3.84265	0.01682	1.0984	0.01817	2.94837	0.01683	-2.36781	0.01683	1.77918	0.0165	2.01378
0.017	-0.60181	0.01702	3.78019	0.01699	1.09656	0.01833	2.96372	0.017	-2.37004	0.017	1.77782	0.01667	2.01394
0.01716	-0.60152	0.01719	3.71603	0.01716	1.09612	0.0185	2.99546	0.01717	-2.37232	0.01716	1.77688	0.01684	2.01424
0.01733	-0.60161	0.01735	3.65356	0.01732	1.09693	0.01866	3.03357	0.01733	-2.37447	0.01733	1.77604	0.017	2.01484
0.0175	-0.60205	0.01752	3.59168	0.01749	1.09766	0.01883	3.0688	0.0175	-2.37654	0.0175	1.77513	0.01717	2.01611
0.01766	-0.60294	0.01768	3.53005	0.01766	1.09825	0.019	3.10435	0.01767	-2.37864	0.01766	1.77355	0.01734	2.01847
0.01783	-0.60406	0.01785	3.46923	0.01782	1.09882	0.01916	3.13621	0.01783	-2.38011	0.01783	1.77174	0.0175	2.02108
0.01799	-0.6059	0.01802	3.40829	0.01799	1.09807	0.01933	3.16621	0.018	-2.38081	0.018	1.77157	0.01767	2.02244
0.01816	-0.60842	0.01818	3.36156	0.01816	1.09711	0.0195	3.19965	0.01816	-2.38132	0.01816	1.77188	0.01784	2.02333
0.01833	-0.61042	0.01835	3.32379	0.01832	1.09623	0.01966	3.23696	0.01833	-2.38319	0.01833	1.77234	0.018	2.02235
0.01849	-0.6119	0.01852	3.28879	0.01849	1.09533	0.01983	3.27624	0.0185	-2.386	0.0185	1.77325	0.01817	2.02039
0.01866	-0.61288	0.01868	3.25481	0.01865	1.09378	0.02	3.32287	0.01866	-2.38845	0.01866	1.77403	0.01834	2.01833
0.01883	-0.61281	0.01885	3.22177	0.01882	1.09123	0.02016	3.36958	0.01883	-2.3907	0.01883	1.77442	0.0185	2.01591
0.01899	-0.61203	0.01902	3.20772	0.01899	1.08864	0.02033	3.41161	0.019	-2.39283	0.019	1.77471	0.01867	2.01379
0.01916	-0.61076	0.01918	3.19662	0.01915	1.0867	0.0205	3.45535	0.01916	-2.3945	0.01916	1.77433	0.01883	2.01333
0.01933	-0.60926	0.01935	3.19509	0.01932	1.08485	0.02066	3.49862	0.01933	-2.39634	0.01933	1.77344	0.019	2.01313
0.01949	-0.60824	0.01952	3.19442	0.01949	1.08316	0.02083	3.53839	0.0195	-2.39922	0.01949	1.7728	0.01917	2.01364
0.01966	-0.60783	0.01968	3.19825	0.01965	1.08142	0.021	3.57971	0.01966	-2.40239	0.01966	1.77225	0.01933	2.01478
0.01983	-0.60812	0.01985	3.2069	0.01982	1.08063	0.02116	3.61993	0.01983	-2.40578	0.01983	1.77173	0.0195	2.01526
0.01999	-0.60935	0.02001	3.227	0.01999	1.08018	0.02133	3.66126	0.02	-2.40931	0.01999	1.77114	0.01967	2.01514
0.02016	-0.61035	0.02018	3.25739	0.02015	1.07946	0.0215	3.70467	0.02016	-2.4131	0.02016	1.77059	0.01983	2.01494
0.02032	-0.61076	0.02035	3.28929	0.02032	1.07751	0.02166	3.74715	0.02033	-2.4168	0.02033	1.77086	0.02	2.01543
0.02049	-0.61081	0.02051	3.32332	0.02049	1.07521	0.02183	3.7764	0.02049	-2.42026	0.02049	1.77132	0.02017	2.01604
0.02066	-0.61093	0.02068	3.35799	0.02065	1.07308	0.02199	3.8024	0.02066	-2.42416	0.02066	1.77126	0.02033	2.01658
0.02082	-0.61111	0.02085	3.41394	0.02082	1.0709	0.02216	3.82527	0.02083	-2.42811	0.02083	1.77059	0.0205	2.01714
0.02099	-0.61169	0.02101	3.47275	0.02099	1.06932	0.02233	3.83897	0.02099	-2.43096	0.02099	1.76893	0.02067	2.01806
0.02116	-0.61292	0.02118	3.53175	0.02115	1.068	0.02249	3.8475	0.02116	-2.43363	0.02116	1.76599	0.02083	2.0195
0.02132	-0.61408	0.02135	3.5906	0.02132	1.06527	0.02266	3.8373	0.02133	-2.43602	0.02133	1.76298	0.021	2.02088
0.02149	-0.61487	0.02151	3.64782	0.02149	1.06138	0.02283	3.82489	0.02149	-2.4376	0.02149	1.75977	0.02116	2.02195
0.02166	-0.61563	0.02168	3.70474	0.02165	1.05721	0.02299	3.81154	0.02166	-2.43909	0.02166	1.75639	0.02133	2.02301
0.02182	-0.61674	0.02185	3.76372	0.02182	1.05522	0.02316	3.79691	0.02183	-2.44069	0.02182	1.75383	0.0215	2.02493
0.02199	-0.61805	0.02201	3.822	0.02198	1.05345	0.02333	3.78524	0.02199	-2.44226	0.02199	1.75155	0.02166	2.02723
0.02216	-0.61857	0.02218	3.88163	0.02215	1.05303	0.02349	3.77621	0.02216	-2.44321	0.02216	1.74936	0.02183	2.03083
0.02232	-0.6184	0.02235	3.92793	0.02232	1.05279	0.02366	3.76774	0.02233	-2.44366	0.02232	1.74711	0.022	2.03483
0.02249	-0.618	0.02251	3.96589	0.02248	1.05289	0.02383	3.75206	0.02249	-2.44251	0.02249	1.74474	0.02216	2.03913
0.02266	-0.61711	0.02268	4.00469	0.02265	1.05358	0.02399	3.73656	0.02266	-2.44043	0.02266	1.74188	0.02233	2.04375
0.02282	-0.61657	0.02284	4.04946	0.02282	1.05496	0.02416	3.71264	0.02283	-2.43838	0.02282	1.73902	0.0225	2.04865
0.02299	-0.61705	0.02301	4.09376	0.02298	1.05746	0.02433	3.6882	0.02299	-2.43677	0.02299	1.73674	0.02266	2.05381
0.02315	-0.61793	0.02318	4.11726	0.02315	1.06008	0.02449	3.66285	0.02316	-2.43527	0.02316	1.73501	0.02283	2.05891
0.02332	-0.61914	0.02334	4.14095	0.02332	1.06209	0.02466	3.63798	0.02332	-2.43429	0.02332	1.73414	0.023	2.06364
0.02349	-0.62073	0.02351	4.16788	0.02348	1.06372	0.02483	3.61448	0.02349	-2.43335	0.02349	1.73368	0.02316	2.06822
0.02365	-0.62183	0.02368	4.19873	0.02365	1.06521	0.02499	3.5931	0.02366	-2.43231	0.02366	1.73327	0.02333	2.07183
0.02382	-0.62241	0.02384	4.2243	0.02382	1.06664	0.02516	3.57185	0.02382	-2.43118	0.02382	1.7327	0.02349	2.07489
0.02399	-0.6232	0.02401	4.24591	0.02398	1.06817	0.02532	3.533	0.02399	-2.42987	0.02399	1.73209	0.02366	2.07801
0.02415	-0.62466	0.02418	4.26714	0.02415	1.07044	0.02549	3.48827	0.02416	-2.42818	0.02415	1.73157	0.02383	2.07918
0.02432	-0.62682	0.02434	4.29002	0.02432	1.07286	0.02566	3.44424	0.02432	-2.42638	0.02432	1.73108	0.02399	2.08023
0.02449	-0.62961	0.02451	4.31391	0.02448	1.07693	0.02582	3.39854	0.02449	-2.4244	0.02449	1.73057	0.02416	2.08057
0.02465	-0.63274	0.02468	4.33389	0.02465	1.08086	0.02599	3.34958	0.02466	-2.42219	0.02465	1.73005	0.02433	2.08085
0.02482	-0.63511	0.02484	4.35375	0.02481	1.08634	0.02616	3.29009	0.02482	-2.41968	0.02482	1.73009	0.02449	2.08177
0.02499	-0.63641	0.02501	4.37524	0.02498	1.09263	0.02632	3.23222	0.02499	-2.4172	0.02499	1.73077	0.02466	2.08433
0.02515	-0.63694	0.02517	4.39839	0.02515	1.09845	0.02649	3.1814	0.02516	-2.41463	0.02515	1.7315	0.02483	2.08651
0.02532	-0.63685	0.02534	4.422	0.02531	1.10392	0.02666	3.13264	0.02532	-2.4124	0.02532	1.73345	0.02499	2.08814
0.02548	-0.63658	0.02551	4.44525	0.02548	1.1094	0.02682	3.07794	0.02549	-2.41029	0.02549	1.73579	0.02516	2.08976
0.02565	-0.63555	0.02567	4.46831	0.02565	1.11197	0.02699	3.02084	0.02565	-2.40928	0.02565	1.73849	0.02533	2.09063
0.02582	-0.63378	0.02584	4.49415	0.02581	1.11431	0.02716	2.96068	0.02582	-2.40826	0.02582	1.74126	0.02549	2.09115
0.02598	-0.63162	0.02601	4.51907	0.02598	1.11439	0.02732	2.90481	0.02599	-2.40623	0.02599	1.74411	0.02566	2.09066
0.02615	-0.62912	0.02617	4.54258	0.02615	1.11445	0.02749	2.84708	0.02615	-2.40345	0.02615	1.74721	0.02582	2.08988
0.02632	-0.62664	0.02634	4.56493	0.02631	1.11441	0.02766	2.78298	0.02632	-2.40139	0.02632	1.75035	0.02599	2.08933
0.02648	-0.62423	0.02651	4.58768	0.02648	1.11422	0.02782	2.72273	0.02649	-2.3998	0.02648	1.75337	0.02616	2.09042
0.02665	-0.62212	0.02667	4.61243	0.02665	1.11364	0.02799	2.66959	0.02665	-2.39819	0.02665	1.7565	0.02632	2.09144
0.02682	-0.62046	0.02684	4.63532	0.02681	1.11246	0.02816	2.61459	0.02682	-2.39769	0.02682	1.75977	0.02649	2.09204
0.02698	-0.61905	0.02701	4.65236	0.02698	1.11128	0.02832	2.56584	0.02699	-2.39724	0.02698	1.7634	0.02666	2.09254
0.02715	-0.61839	0.02717	4.6687	0.02715	1.11067	0.02849	2.52392	0.02715	-2.39622	0.02715	1.76625	0.02682	2.0936
0.02732	-0.61864	0.02734	4.68502	0.02731	1.1102	0.02865	2.48208	0.02732	-2.39524	0.02732	1.76867	0.02699	2.09542
0.02748	-0.61872	0.0275	4.70101	0.02748	1.11049	0.02882	2.44029	0.02749	-2.394	0.02748	1.77106	0.02716	2.09782
0.02765	-0.61842	0.02767	4.71356	0.02765	1.11098	0.02899	2.39831	0.02765	-2.39237	0.02765	1.77398	0.02732	2.10053
0.02781	-0.61802	0.02784	4.7228	0.02781	1.11173	0.02915	2.35307	0.02782	-2.39088	0.02782	1.7771	0.02749	2.10342
0.02798	-0.61727	0.028	4.73128	0.02798	1.11343	0.02932	2.30501	0.02799	-2.38949	0.02798	1.78042	0.02766	2.10636
0.02815	-0.61603	0.02817	4.74069	0.02814	1.11496	0.02949	2.27676	0.02815	-2.38809	0.02815	1.78362	0.02782	2.10888
0.02831	-0.61408	0.02834	4.75115	0.02831	1.11587	0.02965	2.25218	0.02832	-2.38624	0.02832	1.78786	0.02799	2.1114
0.02848	-0.61168	0.0285	4.7616	0.02848	1.11676	0.02982	2.22695	0.02848	-2.38432	0.02848	1.79407	0.02815	2.11537
0.02865	-0.6096	0.02867	4.77044	0.02864	1.11709	0.02999	2.1908	0.02865	-2.38278	0.02865	1.80033	0.02832	2.11985
0.02881	-0.60803	0.02884	4.77968	0.02881	1.11703	0.03015	2.15849	0.02882	-2.38128	0.02881	1.8066	0.02849	2.12434
0.02898	-0.6074	0.029	4.78931	0.02898	1.11541	0.03032	2.14009	0.02898	-2.38004	0.02898	1.81311	0.02865	2.12861
0.02915	-0.60785	0.02917	4.79989	0.02914	1.11307	0.03049	2.12045	0.02915	-2.37991	0.02915	1.81737	0.02882	2.13238
0.02931	-0.60862	0.02934	4.81004	0.02931	1.11068	0.03065	2.10343	0.02932	-2.3797	0.02931	1.8204	0.02899	2.13486
0.02948	-0.60915	0.0295	4.81898	0.02948	1.11048	0.03082	2.0888	0.02948	-2.37926	0.02948	1.82213	0.02915	2.13675
0.02965	-0.60942	0.02967	4.8276	0.02964	1.11035	0.03099	2.08013	0.02965	-2.37884	0.02965	1.82355	0.02932	2.13796
0.02981	-0.6104	0.02983	4.83697	0.02981	1.11341	0.03115	2.07532	0.02982	-2.378	0.02981	1.82497	0.02949	2.13853
0.02998	-0.61214	0.03	4.84697	0.02998	1.11625	0.03132	2.06953	0.02998	-2.37693	0.02998	1.82712	0.02965	2.13944
0.03015	-0.6135	0.03017	4.85629	0.03014	1.11784	0.03149	2.0508	0.03015	-2.37693	0.03015	1.82913	0.02982	2.14082
0.03031	-0.61369	0.03033	4.86467	0.03031	1.1176	0.03165	2.03214	0.03032	-2.37765	0.03031	1.83088	0.02999	2.1424
0.03048	-0.61308	0.0305	4.87267	0.03048	1.11746	0.03182	2.01676	0.03048	-2.37835	0.03048	1.83256	0.03015	2.14477
0.03064	-0.61242	0.03067	4.87813	0.03064	1.11746	0.03198	2.00172	0.03065	-2.37862	0.03065	1.83518	0.03032	2.14742
0.03081	-0.61172	0.03083	4.88249	0.03081	1.11751	0.03215	1.9862	0.03082	-2.37886	0.03081	1.83869	0.03048	2.14877
0.03098	-0.61136	0.031	4.88511	0.03098	1.118	0.03232	1.9681	0.03098	-2.37799	0.03098	1.84172	0.03065	2.14951
0.03114	-0.6115	0.03117	4.88715	0.03114	1.1186	0.03248	1.94488	0.03115	-2.37714	0.03114	1.84461	0.03082	2.1498
0.03131	-0.61101	0.03133	4.89077	0.03131	1.11866	0.03265	1.91647	0.03131	-2.37629	0.03131	1.8475	0.03098	2.14938
0.03148	-0.60963	0.0315	4.89645	0.03147	1.1186	0.03282	1.88641	0.03148	-2.37546	0.03148	1.8517	0.03115	2.14804
0.03164	-0.60814	0.03167	4.90267	0.03164	1.11864	0.03298	1.84739	0.03165	-2.37487	0.03164	1.85608	0.03132	2.1457
0.03181	-0.60732	0.03183	4.90886	0.03181	1.11914	0.03315	1.80498	0.03181	-2.3746	0.03181	1.8598	0.03148	2.14302
0.03198	-0.60716	0.032	4.91508	0.03197	1.1193	0.03332	1.76692	0.03198	-2.37431	0.03198	1.86346	0.03165	2.1412
0.03214	-0.60735	0.03217	4.92118	0.03214	1.11861	0.03348	1.73128	0.03215	-2.37308	0.03214	1.86725	0.03182	2.13987
0.03231	-0.6078	0.03233	4.92721	0.03231	1.11793	0.03365	1.69298	0.03231	-2.3716	0.03231	1.87116	0.03198	2.13895
0.03248	-0.60755	0.0325	4.93134	0.03247	1.11752	0.03382	1.64923	0.03248	-2.37054	0.03248	1.87428	0.03215	2.13824
0.03264	-0.60588	0.03266	4.93467	0.03264	1.1174	0.03398	1.60797	0.03265	-2.36961	0.03264	1.87518	0.03232	2.13708
0.03281	-0.6032	0.03283	4.93858	0.03281	1.11784	0.03415	1.57394	0.03281	-2.36892	0.03281	1.87607	0.03248	2.13466
0.03297	-0.59998	0.033	4.94415	0.03297	1.11861	0.03432	1.54154	0.03298	-2.36895	0.03298	1.87599	0.03265	2.1319
0.03314	-0.59656	0.03316	4.94979	0.03314	1.11944	0.03448	1.50394	0.03315	-2.36925	0.03314	1.87543	0.03281	2.12941
0.03331	-0.59384	0.03333	4.95446	0.03331	1.12065	0.03465	1.46038	0.03331	-2.3691	0.03331	1.877	0.03298	2.12701
0.03347	-0.59176	0.0335	4.95899	0.03347	1.12156	0.03482	1.41398	0.03348	-2.36834	0.03347	1.8797	0.03315	2.12457
0.03364	-0.58996	0.03366	4.96744	0.03364	1.12056	0.03498	1.36657	0.03364	-2.36757	0.03364	1.88238	0.03331	2.12213
0.03381	-0.58845	0.03383	4.97859	0.03381	1.11958	0.03515	1.3168	0.03381	-2.3665	0.03381	1.8846	0.03348	2.12039
0.03397	-0.58701	0.034	4.98917	0.03397	1.11853	0.03531	1.2624	0.03398	-2.36526	0.03397	1.88672	0.03365	2.11928
0.03414	-0.58564	0.03416	4.99939	0.03414	1.1176	0.03548	1.2084	0.03414	-2.36432	0.03414	1.88826	0.03381	2.1184
0.03431	-0.58469	0.03433	5.00955	0.03431	1.11812	0.03565	1.16456	0.03431	-2.36361	0.03431	1.88957	0.03398	2.11866
0.03447	-0.58489	0.0345	5.02013	0.03447	1.12018	0.03581	1.12199	0.03448	-2.36292	0.03447	1.88678	0.03415	2.11926
0.03464	-0.58592	0.03466	5.03114	0.03464	1.12233	0.03598	1.077	0.03464	-2.36318	0.03464	1.8786	0.03431	2.119
0.03481	-0.58683	0.03483	5.04505	0.0348	1.12465	0.03615	1.02769	0.03481	-2.36378	0.03481	1.86958	0.03448	2.11843
0.03497	-0.58757	0.03499	5.05948	0.03497	1.12699	0.03631	0.97886	0.03498	-2.36472	0.03497	1.86008	0.03465	2.11821
0.03514	-0.58792	0.03516	5.07408	0.03514	1.1289	0.03648	0.93176	0.03514	-2.36577	0.03514	1.85011	0.03481	2.11846
0.0353	-0.58778	0.03533	5.08953	0.0353	1.13074	0.03665	0.88335	0.03531	-2.36632	0.03531	1.83871	0.03498	2.11936
0.03547	-0.5875	0.03549	5.10313	0.03547	1.13287	0.03681	0.83592	0.03548	-2.36596	0.03547	1.82525	0.03514	2.12096
0.03564	-0.58765	0.03566	5.11459	0.03564	1.13593	0.03698	0.78933	0.03564	-2.36533	0.03564	1.81185	0.03531	2.12273
0.0358	-0.58813	0.03583	5.12572	0.0358	1.13894	0.03715	0.751	0.03581	-2.36469	0.03581	1.79779	0.03548	2.12543
0.03597	-0.58794	0.03599	5.13474	0.03597	1.14147	0.03731	0.71524	0.03598	-2.36404	0.03597	1.78306	0.03564	2.12859
0.03614	-0.58716	0.03616	5.14272	0.03614	1.14375	0.03748	0.68176	0.03614	-2.36239	0.03614	1.76669	0.03581	2.13081
0.0363	-0.58583	0.03633	5.15062	0.0363	1.14449	0.03765	0.6525	0.03631	-2.35996	0.0363	1.7497	0.03598	2.13263
0.03647	-0.58319	0.03649	5.15861	0.03647	1.14396	0.03781	0.62528	0.03647	-2.35815	0.03647	1.73337	0.03614	2.13383
0.03664	-0.58054	0.03666	5.16648	0.03664	1.14313	0.03798	0.60426	0.03664	-2.3568	0.03664	1.71591	0.03631	2.13355
0.0368	-0.57931	0.03683	5.17244	0.0368	1.14211	0.03815	0.58404	0.03681	-2.35557	0.0368	1.69845	0.03648	2.13331
0.03697	-0.57877	0.03699	5.17732	0.03697	1.14144	0.03831	0.56162	0.03697	-2.355	0.03697	1.67915	0.03664	2.13437
0.03714	-0.57919	0.03716	5.18056	0.03714	1.1421	0.03848	0.53515	0.03714	-2.3544	0.03714	1.66082	0.03681	2.13582
0.0373	-0.58083	0.03732	5.18352	0.0373	1.14281	0.03864	0.51242	0.03731	-2.35283	0.0373	1.64347	0.03698	2.13846
0.03747	-0.58207	0.03749	5.18651	0.03747	1.14319	0.03881	0.4946	0.03747	-2.35097	0.03747	1.62551	0.03714	2.14206
0.03764	-0.58262	0.03766	5.18957	0.03764	1.1435	0.03898	0.47828	0.03764	-2.34879	0.03764	1.60752	0.03731	2.14594
0.0378	-0.58296	0.03782	5.1885	0.0378	1.14361	0.03914	0.46012	0.03781	-2.34622	0.0378	1.58939	0.03747	2.14985
0.03797	-0.58254	0.03799	5.1849	0.03797	1.14335	0.03931	0.43975	0.03797	-2.34377	0.03797	1.57153	0.03764	2.15372
0.03813	-0.5815	0.03816	5.18094	0.03813	1.14315	0.03948	0.4206	0.03814	-2.34156	0.03814	1.55368	0.03781	2.15878
0.0383	-0.58033	0.03832	5.17736	0.0383	1.143	0.03964	0.40657	0.03831	-2.33937	0.0383	1.53624	0.03797	2.16418
0.03847	-0.57913	0.03849	5.1738	0.03847	1.14304	0.03981	0.39356	0.03847	-2.33536	0.03847	1.5187	0.03814	2.16839
0.03863	-0.57796	0.03866	5.16971	0.03863	1.14386	0.03998	0.38019	0.03864	-2.33065	0.03863	1.50534	0.03831	2.17218
0.0388	-0.57683	0.03882	5.16545	0.0388	1.14526	0.04014	0.36687	0.0388	-2.32484	0.0388	1.49723	0.03847	2.17666
0.03897	-0.57585	0.03899	5.16125	0.03897	1.14642	0.04031	0.35509	0.03897	-2.31883	0.03897	1.48849	0.03864	2.18232
0.03913	-0.57504	0.03916	5.15684	0.03913	1.14752	0.04048	0.34785	0.03914	-2.31256	0.03913	1.47745	0.03881	2.18791
0.0393	-0.57429	0.03932	5.152	0.0393	1.14868	0.04064	0.34115	0.0393	-2.30592	0.0393	1.46509	0.03897	2.1931
0.03947	-0.5743	0.03949	5.14681	0.03947	1.15086	0.04081	0.33571	0.03947	-2.29966	0.03947	1.4544	0.03914	2.19816
0.03963	-0.57513	0.03966	5.14147	0.03963	1.15306	0.04098	0.3312	0.03964	-2.29439	0.03963	1.44469	0.03931	2.20451
0.0398	-0.57555	0.03982	5.13602	0.0398	1.15429	0.04114	0.32717	0.0398	-2.28925	0.0398	1.43513	0.03947	2.21157
0.03997	-0.57555	0.03999	5.1304	0.03997	1.15538	0.04131	0.32338	0.03997	-2.28416	0.03997	1.42651	0.03964	2.21791
0.04013	-0.5753	0.04015	5.12684	0.04013	1.15627	0.04147	0.3196	0.04014	-2.27905	0.04013	1.41826	0.0398	2.22369
0.0403	-0.57442	0.04032	5.12442	0.0403	1.15681	0.04164	0.32882	0.0403	-2.27506	0.0403	1.41137	0.03997	2.22991
0.04046	-0.57366	0.04049	5.12206	0.04047	1.15741	0.04181	0.33984	0.04047	-2.27177	0.04047	1.40484	0.04014	2.23817
0.04063	-0.57425	0.04065	5.11928	0.04063	1.15921	0.04197	0.34605	0.04064	-2.26851	0.04063	1.39739	0.0403	2.24742
0.0408	-0.57558	0.04082	5.11658	0.0408	1.16221	0.04214	0.35144	0.0408	-2.26469	0.0408	1.38983	0.04047	2.25826
0.04096	-0.57727	0.04099	5.11571	0.04096	1.16524	0.04231	0.35466	0.04097	-2.26067	0.04096	1.38324	0.04064	2.2693
0.04113	-0.57938	0.04115	5.11518	0.04113	1.16774	0.04247	0.35414	0.04114	-2.25593	0.04113	1.37775	0.0408	2.2805
0.0413	-0.58065	0.04132	5.11443	0.0413	1.17001	0.04264	0.35592	0.0413	-2.2511	0.0413	1.37227	0.04097	2.29134
0.04146	-0.5807	0.04149	5.11338	0.04146	1.17084	0.04281	0.36205	0.04147	-2.24671	0.04146	1.36748	0.04114	2.30078
0.04163	-0.58039	0.04165	5.11225	0.04163	1.17135	0.04297	0.36865	0.04163	-2.24282	0.04163	1.36277	0.0413	2.30944
0.0418	-0.57947	0.04182	5.11106	0.0418	1.17185	0.04314	0.36867	0.0418	-2.23941	0.0418	1.35855	0.04147	2.31794
0.04196	-0.57822	0.04199	5.10988	0.04196	1.1714	0.04331	0.36639	0.04197	-2.23645	0.04196	1.35449	0.04164	2.32015
0.04213	-0.57773	0.04215	5.10883	0.04213	1.17096	0.04347	0.36744	0.04213	-2.23352	0.04213	1.35027	0.0418	2.32029
0.0423	-0.57784	0.04232	5.10781	0.0423	1.17096	0.04364	0.36967	0.0423	-2.22994	0.0423	1.34578	0.04197	2.31921
0.04246	-0.57788	0.04248	5.10644	0.04246	1.17101	0.04381	0.37149	0.04247	-2.22619	0.04246	1.34111	0.04213	2.31773
0.04263	-0.5778	0.04265	5.10494	0.04263	1.17197	0.04397	0.37135	0.04263	-2.22434	0.04263	1.3364	0.0423	2.31474
0.04279	-0.57764	0.04282	5.1047	0.0428	1.17437	0.04414	0.37092	0.0428	-2.22307	0.0428	1.33179	0.04247	2.30895
0.04296	-0.57741	0.04298	5.10774	0.04296	1.17614	0.04431	0.37009	0.04297	-2.22194	0.04296	1.32683	0.04263	2.30193
0.04313	-0.57717	0.04315	5.11139	0.04313	1.1771	0.04447	0.36924	0.04313	-2.22101	0.04313	1.32253	0.0428	2.29369
0.04329	-0.57643	0.04332	5.11517	0.0433	1.17798	0.04464	0.37016	0.0433	-2.2203	0.04329	1.32065	0.04297	2.28484
0.04346	-0.57522	0.04348	5.11906	0.04346	1.17768	0.0448	0.37243	0.04347	-2.22003	0.04346	1.32015	0.04313	2.27459
0.04363	-0.57321	0.04365	5.12169	0.04363	1.17698	0.04497	0.37347	0.04363	-2.21986	0.04363	1.32017	0.0433	2.26354
0.04379	-0.57035	0.04382	5.1235	0.0438	1.17503	0.04514	0.37362	0.0438	-2.22042	0.04379	1.32192	0.04347	2.25082
0.04396	-0.56776	0.04398	5.12533	0.04396	1.17291	0.0453	0.37371	0.04397	-2.22141	0.04396	1.32343	0.04363	2.23756
0.04413	-0.56572	0.04415	5.12723	0.04413	1.17092	0.04547	0.36916	0.04413	-2.22248	0.04413	1.32431	0.0438	2.22406
0.04429	-0.56425	0.04432	5.12945	0.04429	1.16963	0.04564	0.36388	0.0443	-2.22359	0.04429	1.32522	0.04397	2.21057
0.04446	-0.56341	0.04448	5.13393	0.04446	1.16867	0.0458	0.34421	0.04446	-2.2245	0.04446	1.3262	0.04413	2.19673
0.04463	-0.56295	0.04465	5.13899	0.04463	1.16839	0.04597	0.32403	0.04463	-2.22383	0.04463	1.32746	0.0443	2.18111
0.04479	-0.5625	0.04481	5.14439	0.04479	1.16814	0.04614	0.30565	0.0448	-2.22294	0.04479	1.32927	0.04446	2.16492
0.04496	-0.56207	0.04498	5.14998	0.04496	1.16806	0.0463	0.29096	0.04496	-2.2226	0.04496	1.33167	0.04463	2.14862
0.04512	-0.5613	0.04515	5.15659	0.04513	1.1681	0.04647	0.2792	0.04513	-2.22237	0.04513	1.33423	0.0448	2.13288
0.04529	-0.56011	0.04531	5.1644	0.04529	1.1687	0.04664	0.2712	0.0453	-2.22221	0.04529	1.33741	0.04496	2.1172
0.04546	-0.55905	0.04548	5.17263	0.04546	1.16968	0.0468	0.26328	0.04546	-2.22213	0.04546	1.34059	0.04513	2.10204
0.04562	-0.55907	0.04565	5.18134	0.04563	1.17066	0.04697	0.25831	0.04563	-2.2216	0.04562	1.34328	0.0453	2.08673
0.04579	-0.56011	0.04581	5.18987	0.04579	1.17053	0.04714	0.25468	0.0458	-2.22051	0.04579	1.346	0.04546	2.07033
0.04596	-0.56173	0.04598	5.2005	0.04596	1.17027	0.0473	0.25815	0.04596	-2.21935	0.04596	1.3495	0.04563	2.05348
0.04612	-0.56388	0.04615	5.21145	0.04613	1.17106	0.04747	0.26359	0.04613	-2.21768	0.04612	1.35435	0.0458	2.04268
0.04629	-0.56555	0.04631	5.22253	0.04629	1.17186	0.04764	0.26777	0.0463	-2.21583	0.04629	1.35952	0.04596	2.03415
0.04646	-0.56621	0.04648	5.2336	0.04646	1.17258	0.0478	0.2621	0.04646	-2.21464	0.04646	1.36492	0.04613	2.02538
0.04662	-0.56648	0.04665	5.24507	0.04663	1.17307	0.04797	0.25683	0.04663	-2.21362	0.04662	1.37032	0.0463	2.01634
0.04679	-0.56686	0.04681	5.25837	0.04679	1.17257	0.04813	0.2537	0.04679	-2.21174	0.04679	1.37585	0.04646	2.00874
0.04696	-0.56729	0.04698	5.2707	0.04696	1.17062	0.0483	0.25054	0.04696	-2.20771	0.04696	1.38159	0.04663	2.00372
0.04712	-0.56792	0.04714	5.27977	0.04713	1.16861	0.04847	0.24954	0.04713	-2.20326	0.04712	1.38747	0.04679	1.99959
0.04729	-0.56878	0.04731	5.28822	0.04729	1.16614	0.04863	0.25068	0.04729	-2.19851	0.04729	1.39334	0.04696	1.99388
0.04746	-0.56998	0.04748	5.29908	0.04746	1.16337	0.0488	0.24999	0.04746	-2.19373	0.04746	1.39991	0.04713	1.98625
0.04762	-0.57184	0.04764	5.31154	0.04762	1.16185	0.04897	0.24801	0.04763	-2.1871	0.04762	1.40916	0.04729	1.97952
0.04779	-0.57357	0.04781	5.32583	0.04779	1.16063	0.04913	0.24601	0.04779	-2.17938	0.04779	1.41794	0.04746	1.97372
0.04795	-0.57494	0.04798	5.34053	0.04796	1.15944	0.0493	0.25263	0.04796	-2.17083	0.04795	1.42449	0.04763	1.96808
0.04812	-0.57584	0.04814	5.35566	0.04812	1.15875	0.04947	0.26068	0.04813	-2.1619	0.04812	1.43117	0.04779	1.96222
0.04829	-0.57624	0.04831	5.37531	0.04829	1.15785	0.04963	0.27332	0.04829	-2.15282	0.04829	1.43799	0.04796	1.95623
0.04845	-0.57622	0.04848	5.39489	0.04846	1.15629	0.0498	0.28637	0.04846	-2.14509	0.04845	1.44483	0.04813	1.95017
0.04862	-0.57516	0.04864	5.41261	0.04862	1.15471	0.04997	0.30894	0.04863	-2.13759	0.04862	1.45162	0.04829	1.94409
0.04879	-0.57185	0.04881	5.42992	0.04879	1.15286	0.05013	0.35304	0.04879	-2.13166	0.04879	1.45841	0.04846	1.93863
0.04895	-0.56818	0.04898	5.44819	0.04896	1.15058	0.0503	0.39651	0.04896	-2.12608	0.04895	1.46524	0.04863	1.93469
0.04912	-0.56419	0.04914	5.46813	0.04912	1.14809	0.05047	0.43542	0.04913	-2.1198	0.04912	1.47204	0.04879	1.93111
0.04929	-0.56038	0.04931	5.48734	0.04929	1.14558	0.05063	0.47399	0.04929	-2.11303	0.04929	1.47862	0.04896	1.92733
0.04945	-0.55697	0.04948	5.50528	0.04946	1.14301	0.0508	0.50876	0.04946	-2.10617	0.04945	1.48515	0.04912	1.92339
0.04962	-0.55415	0.04964	5.52352	0.04962	1.14117	0.05097	0.54189	0.04962	-2.09907	0.04962	1.49115	0.04929	1.91985
0.04979	-0.55061	0.04981	5.54337	0.04979	1.13969	0.05113	0.57175	0.04979	-2.09195	0.04979	1.49708	0.04946	1.9165
0.04995	-0.5457	0.04997	5.56396	0.04996	1.13927	0.0513	0.60009	0.04996	-2.0848	0.04995	1.50349	0.04962	1.91426
0.05012	-0.54079	0.05014	5.58334	0.05012	1.13897	0.05146	0.62824	0.05012	-2.07766	0.05012	1.5118	0.04979	1.91247
0.05028	-0.53629	0.05031	5.60159	0.05029	1.13883	0.05163	0.65734	0.05029	-2.07106	0.05029	1.51979	0.04996	1.91069
0.05045	-0.53224	0.05047	5.62059	0.05046	1.13962	0.0518	0.6874	0.05046	-2.06463	0.05045	1.52603	0.05012	1.90883
0.05062	-0.52925	0.05064	5.64245	0.05062	1.14047	0.05196	0.72725	0.05062	-2.05859	0.05062	1.53209	0.05029	1.90694
0.05078	-0.52684	0.05081	5.66503	0.05079	1.14152	0.05213	0.76683	0.05079	-2.05328	0.05078	1.53824	0.05046	1.90547
0.05095	-0.52369	0.05097	5.68582	0.05095	1.14257	0.0523	0.80758	0.05096	-2.04912	0.05095	1.54436	0.05062	1.90415
0.05112	-0.51838	0.05114	5.70559	0.05112	1.14335	0.05246	0.84719	0.05112	-2.04704	0.05112	1.55029	0.05079	1.90349
0.05128	-0.51309	0.05131	5.73047	0.05129	1.14387	0.05263	0.88563	0.05129	-2.04536	0.05128	1.55608	0.05096	1.90403
0.05145	-0.50747	0.05147	5.76115	0.05145	1.1449	0.0528	0.92169	0.05146	-2.04221	0.05145	1.56187	0.05112	1.90644
0.05162	-0.50178	0.05164	5.79053	0.05162	1.14625	0.05296	0.95863	0.05162	-2.03772	0.05162	1.5684	0.05129	1.9109
0.05178	-0.49568	0.05181	5.81712	0.05179	1.1476	0.05313	0.99311	0.05179	-2.03483	0.05178	1.57502	0.05145	1.91589
0.05195	-0.48898	0.05197	5.84407	0.05195	1.14943	0.0533	1.02768	0.05195	-2.03309	0.05195	1.57782	0.05162	1.92031
0.05212	-0.48263	0.05214	5.87788	0.05212	1.15126	0.05346	1.0532	0.05212	-2.03147	0.05212	1.58067	0.05179	1.92438
0.05228	-0.47663	0.0523	5.91483	0.05229	1.15259	0.05363	1.07686	0.05229	-2.02985	0.05228	1.58406	0.05195	1.92864
0.05245	-0.47065	0.05247	5.94781	0.05245	1.15391	0.0538	1.10193	0.05245	-2.02813	0.05245	1.5889	0.05212	1.933
0.05261	-0.46467	0.05264	5.97977	0.05262	1.15543	0.05396	1.12657	0.05262	-2.02522	0.05262	1.59359	0.05229	1.93747
0.05278	-0.45931	0.0528	6.01554	0.05279	1.15728	0.05413	1.14186	0.05279	-2.02219	0.05278	1.598	0.05245	1.94247
0.05295	-0.45649	0.05297	6.06216	0.05295	1.15941	0.0543	1.13574	0.05295	-2.01876	0.05295	1.60241	0.05262	1.94692
0.05311	-0.45394	0.05314	6.1095	0.05312	1.16193	0.05446	1.12921	0.05312	-2.01489	0.05311	1.6062	0.05279	1.9497
0.05328	-0.44894	0.0533	6.15508	0.05329	1.16458	0.05463	1.12173	0.05329	-2.0114	0.05328	1.60972	0.05295	1.95203
0.05345	-0.44016	0.05347	6.20031	0.05345	1.16868	0.05479	1.11282	0.05345	-2.00856	0.05345	1.61379	0.05312	1.95652
0.05361	-0.43074	0.05364	6.25575	0.05362	1.17331	0.05496	1.10746	0.05362	-2.00583	0.05361	1.61799	0.05329	1.96318
0.05378	-0.42081	0.0538	6.32578	0.05379	1.17722	0.05513	1.10445	0.05379	-2.00077	0.05378	1.62213	0.05345	1.97025
0.05395	-0.41025	0.05397	6.3942	0.05395	1.18082	0.05529	1.10136	0.05395	-1.99474	0.05395	1.62598	0.05362	1.97694
0.05411	-0.39765	0.05414	6.4612	0.05412	1.18446	0.05546	1.09777	0.05412	-1.98869	0.05411	1.62934	0.05378	1.9837
0.05428	-0.38434	0.0543	6.53021	0.05428	1.18773	0.05563	1.09391	0.05429	-1.98267	0.05428	1.63089	0.05395	1.99185
0.05445	-0.37072	0.05447	6.61492	0.05445	1.19092	0.05579	1.08975	0.05445	-1.97638	0.05445	1.63246	0.05412	2.00047
0.05461	-0.35691	0.05463	6.70697	0.05462	1.19317	0.05596	1.08559	0.05462	-1.96755	0.05461	1.63353	0.05428	2.00946
0.05478	-0.34104	0.0548	6.79355	0.05478	1.1954	0.05613	1.07957	0.05478	-1.95763	0.05478	1.63417	0.05445	2.01834
0.05495	-0.31965	0.05497	6.87893	0.05495	1.19746	0.05629	1.06605	0.05495	-1.94709	0.05495	1.63481	0.05462	2.02795
0.05511	-0.29898	0.05513	6.97205	0.05512	1.19917	0.05646	1.05235	0.05512	-1.93649	0.05511	1.63547	0.05478	2.04028
0.05528	-0.28044	0.0553	7.07538	0.05528	1.20122	0.05663	1.0379	0.05528	-1.92442	0.05528	1.63614	0.05495	2.05248
0.05544	-0.26157	0.05547	7.17905	0.05545	1.20345	0.05679	1.02398	0.05545	-1.91132	0.05544	1.63717	0.05512	2.06371
0.05561	-0.23959	0.05563	7.27445	0.05562	1.2058	0.05696	1.00741	0.05562	-1.89924	0.05561	1.6382	0.05528	2.07438
0.05578	-0.21549	0.0558	7.37135	0.05578	1.2096	0.05713	0.98999	0.05578	-1.8888	0.05578	1.63844	0.05545	2.08521
0.05594	-0.19245	0.05597	7.4747	0.05595	1.21385	0.05729	0.97318	0.05595	-1.87828	0.05594	1.63876	0.05562	2.09582
0.05611	-0.16961	0.05613	7.58644	0.05612	1.21752	0.05746	0.95718	0.05612	-1.86385	0.05611	1.64014	0.05578	2.10715
0.05628	-0.14561	0.0563	7.68942	0.05628	1.22113	0.05763	0.94125	0.05628	-1.84828	0.05628	1.64355	0.05595	2.11897
0.05644	-0.12016	0.05647	7.79189	0.05645	1.22509	0.05779	0.92263	0.05645	-1.83319	0.05644	1.64625	0.05611	2.13051
0.05661	-0.09419	0.05663	7.89601	0.05662	1.22981	0.05796	0.90337	0.05662	-1.81773	0.05661	1.64769	0.05628	2.14256
0.05678	-0.06825	0.0568	8.00859	0.05678	1.23434	0.05812	0.88437	0.05678	-1.80209	0.05678	1.64898	0.05645	2.15442
0.05694	-0.04214	0.05696	8.1236	0.05695	1.23853	0.05829	0.86543	0.05695	-1.7862	0.05694	1.64881	0.05661	2.16609
0.05711	-0.0152	0.05713	8.22415	0.05712	1.24265	0.05846	0.84816	0.05712	-1.77061	0.05711	1.64809	0.05678	2.17773
0.05728	0.01269	0.0573	8.3251	0.05728	1.24601	0.05862	0.83282	0.05728	-1.75558	0.05728	1.64799	0.05695	2.18875
0.05744	0.03801	0.05746	8.42988	0.05745	1.2488	0.05879	0.81857	0.05745	-1.74066	0.05744	1.64818	0.05711	2.19914
0.05761	0.05926	0.05763	8.54515	0.05761	1.25017	0.05896	0.80626	0.05761	-1.72418	0.05761	1.64873	0.05728	2.20717
0.05777	0.08157	0.0578	8.65215	0.05778	1.25096	0.05912	0.79348	0.05778	-1.70676	0.05777	1.65126	0.05745	2.21271
0.05794	0.10547	0.05796	8.74317	0.05795	1.25158	0.05929	0.77707	0.05795	-1.69151	0.05794	1.65387	0.05761	2.21782
0.05811	0.1303	0.05813	8.82889	0.05811	1.24988	0.05946	0.76041	0.05811	-1.67727	0.05811	1.65672	0.05778	2.22427
0.05827	0.1538	0.0583	8.9255	0.05828	1.24816	0.05962	0.74381	0.05828	-1.66245	0.05827	1.65961	0.05795	2.23233
0.05844	0.17585	0.05846	9.02363	0.05845	1.24672	0.05979	0.7274	0.05845	-1.64572	0.05844	1.66347	0.05811	2.23935
0.05861	0.19894	0.05863	9.10799	0.05861	1.24534	0.05996	0.71022	0.05861	-1.62899	0.05861	1.66818	0.05828	2.2456
0.05877	0.22439	0.0588	9.18378	0.05878	1.24513	0.06012	0.68909	0.05878	-1.61482	0.05877	1.67344	0.05844	2.25196
0.05894	0.24761	0.05896	9.26279	0.05895	1.24654	0.06029	0.67072	0.05895	-1.60068	0.05894	1.67908	0.05861	2.25803
0.05911	0.26575	0.05913	9.34889	0.05911	1.24821	0.06046	0.65975	0.05911	-1.59028	0.05911	1.68463	0.05878	2.26357
0.05927	0.28388	0.0593	9.42971	0.05928	1.25012	0.06062	0.64881	0.05928	-1.58382	0.05927	1.68954	0.05894	2.26657
0.05944	0.30348	0.05946	9.50009	0.05945	1.2519	0.06079	0.64123	0.05945	-1.57894	0.05944	1.6943	0.05911	2.2686
0.05961	0.32348	0.05963	9.56567	0.05961	1.25106	0.06095	0.63741	0.05961	-1.57555	0.05961	1.69868	0.05928	2.27083
0.05977	0.34109	0.05979	9.62904	0.05978	1.24956	0.06112	0.63574	0.05978	-1.57229	0.05977	1.70307	0.05944	2.27334
0.05994	0.35634	0.05996	9.69358	0.05995	1.24653	0.06129	0.63551	0.05994	-1.57062	0.05994	1.70698	0.05961	2.27602
0.0601	0.3721	0.06013	9.75336	0.06011	1.2432	0.06145	0.63529	0.06011	-1.56937	0.0601	1.70994	0.05978	2.27869
0.06027	0.3892	0.06029	9.80567	0.06028	1.24068	0.06162	0.63562	0.06028	-1.57197	0.06027	1.71185	0.05994	2.28142
0.06044	0.40596	0.06046	9.85712	0.06044	1.24052	0.06179	0.63608	0.06044	-1.57566	0.06044	1.71169	0.06011	2.28633
0.0606	0.421	0.06063	9.90851	0.06061	1.24012	0.06195	0.63916	0.06061	-1.58025	0.0606	1.71151	0.06028	2.29276
0.06077	0.43525	0.06079	9.95986	0.06078	1.23895	0.06212	0.64236	0.06078	-1.5865	0.06077	1.71092	0.06044	2.29899
0.06094	0.44911	0.06096	10.0007	0.06094	1.23777	0.06229	0.64446	0.06094	-1.59334	0.06094	1.71026	0.06061	2.30504
0.0611	0.46196	0.06113	10.0375	0.06111	1.23624	0.06245	0.64408	0.06111	-1.60026	0.0611	1.7111	0.06077	2.31072
0.06127	0.47401	0.06129	10.0729	0.06128	1.23451	0.06262	0.64201	0.06128	-1.60742	0.06127	1.71253	0.06094	2.3139
0.06144	0.48468	0.06146	10.107	0.06144	1.23358	0.06279	0.63752	0.06144	-1.61523	0.06144	1.71399	0.06111	2.31658
0.0616	0.49516	0.06163	10.1349	0.06161	1.23313	0.06295	0.63302	0.06161	-1.62314	0.0616	1.71561	0.06127	2.32005
0.06177	0.50447	0.06179	10.1546	0.06178	1.23271	0.06312	0.62822	0.06178	-1.63292	0.06177	1.71687	0.06144	2.32374
0.06194	0.51194	0.06196	10.1723	0.06194	1.23284	0.06329	0.6233	0.06194	-1.64339	0.06194	1.71617	0.06161	2.32833
0.0621	0.5173	0.06212	10.1883	0.06211	1.23309	0.06345	0.622	0.06211	-1.65454	0.0621	1.71547	0.06177	2.33404
0.06227	0.52166	0.06229	10.2028	0.06228	1.23577	0.06362	0.62159	0.06228	-1.66839	0.06227	1.71506	0.06194	2.33844
0.06244	0.5263	0.06246	10.212	0.06244	1.23839	0.06379	0.62124	0.06244	-1.68246	0.06243	1.71486	0.06211	2.34129
0.0626	0.53162	0.06262	10.2176	0.06261	1.2418	0.06395	0.62605	0.06261	-1.69924	0.0626	1.71377	0.06227	2.34379
0.06277	0.53607	0.06279	10.2221	0.06278	1.24605	0.06412	0.63167	0.06277	-1.71597	0.06277	1.71177	0.06244	2.34679
0.06293	0.53803	0.06296	10.2232	0.06294	1.24903	0.06428	0.6409	0.06294	-1.73396	0.06293	1.70979	0.06261	2.35
0.0631	0.53995	0.06312	10.2207	0.06311	1.25048	0.06445	0.64977	0.06311	-1.75183	0.0631	1.708	0.06277	2.35339
0.06327	0.54147	0.06329	10.2126	0.06328	1.25188	0.06462	0.65748	0.06327	-1.76714	0.06327	1.70629	0.06294	2.35686
0.06343	0.5423	0.06346	10.202	0.06344	1.2526	0.06478	0.66345	0.06344	-1.77915	0.06343	1.70528	0.0631	2.36064
0.0636	0.54204	0.06362	10.1895	0.06361	1.25336	0.06495	0.66592	0.06361	-1.79	0.0636	1.70439	0.06327	2.36503
0.06377	0.54043	0.06379	10.1753	0.06377	1.25669	0.06512	0.66482	0.06377	-1.80067	0.06377	1.70372	0.06344	2.36946
0.06393	0.53875	0.06396	10.1606	0.06394	1.26063	0.06528	0.66388	0.06394	-1.81128	0.06393	1.70357	0.0636	2.37357
0.0641	0.53705	0.06412	10.1461	0.06411	1.26449	0.06545	0.66935	0.06411	-1.82019	0.0641	1.70386	0.06377	2.37759
0.06427	0.53488	0.06429	10.1313	0.06427	1.26805	0.06562	0.67643	0.06427	-1.82874	0.06427	1.70501	0.06394	2.38144
0.06443	0.53124	0.06445	10.1126	0.06444	1.27082	0.06578	0.68321	0.06444	-1.83779	0.06443	1.70608	0.0641	2.3853
0.0646	0.52711	0.06462	10.0918	0.06461	1.27124	0.06595	0.68967	0.06461	-1.85014	0.0646	1.70628	0.06427	2.38696
0.06477	0.52226	0.06479	10.0704	0.06477	1.27189	0.06612	0.69675	0.06477	-1.86247	0.06476	1.70612	0.06444	2.38715
0.06493	0.51585	0.06495	10.0493	0.06494	1.27567	0.06628	0.7049	0.06494	-1.87336	0.06493	1.70637	0.0646	2.38695
0.0651	0.51003	0.06512	10.0262	0.06511	1.28149	0.06645	0.71448	0.0651	-1.88356	0.0651	1.70681	0.06477	2.38599
0.06526	0.50506	0.06529	9.99958	0.06527	1.28785	0.06662	0.72606	0.06527	-1.89529	0.06526	1.70736	0.06494	2.38528
0.06543	0.50012	0.06545	9.97322	0.06544	1.29419	0.06678	0.73817	0.06544	-1.90848	0.06543	1.70854	0.0651	2.38698
0.0656	0.49503	0.06562	9.9482	0.06561	1.30061	0.06695	0.75365	0.0656	-1.92101	0.0656	1.70967	0.06527	2.38958
0.06576	0.49018	0.06579	9.92407	0.06577	1.30839	0.06712	0.77168	0.06577	-1.93305	0.06576	1.71062	0.06543	2.3933
0.06593	0.48671	0.06595	9.89989	0.06594	1.31639	0.06728	0.79071	0.06594	-1.94538	0.06593	1.71156	0.0656	2.3982
0.0661	0.48422	0.06612	9.87617	0.06611	1.32356	0.06745	0.80923	0.0661	-1.96039	0.0661	1.71226	0.06577	2.4025
0.06626	0.48147	0.06629	9.85427	0.06627	1.33072	0.06761	0.82874	0.06627	-1.9764	0.06626	1.71269	0.06593	2.40585
0.06643	0.47792	0.06645	9.83296	0.06644	1.33755	0.06778	0.86038	0.06644	-1.98974	0.06643	1.71283	0.0661	2.40897
0.0666	0.47383	0.06662	9.81128	0.06661	1.3434	0.06795	0.89473	0.0666	-2.00267	0.0666	1.7127	0.06627	2.41081
0.06676	0.46908	0.06678	9.78631	0.06677	1.34874	0.06811	0.92378	0.06677	-2.01591	0.06676	1.71281	0.06643	2.41213
0.06693	0.46406	0.06695	9.76054	0.06694	1.353	0.06828	0.95176	0.06694	-2.03005	0.06693	1.71577	0.0666	2.41294
0.0671	0.45813	0.06712	9.73814	0.0671	1.35742	0.06845	0.98747	0.0671	-2.04414	0.0671	1.71916	0.06677	2.41356
0.06726	0.45098	0.06728	9.71721	0.06727	1.36184	0.06861	1.03783	0.06727	-2.05699	0.06726	1.72244	0.06693	2.41447
0.06743	0.44424	0.06745	9.69376	0.06744	1.36651	0.06878	1.08745	0.06744	-2.06954	0.06743	1.7256	0.0671	2.41593
0.06759	0.43794	0.06762	9.66739	0.0676	1.37167	0.06895	1.1408	0.0676	-2.08143	0.06759	1.72873	0.06727	2.41726
0.06776	0.43157	0.06778	9.64174	0.06777	1.37717	0.06911	1.19521	0.06777	-2.09331	0.06776	1.73183	0.06743	2.41798
0.06793	0.4249	0.06795	9.61845	0.06794	1.38244	0.06928	1.27905	0.06793	-2.10532	0.06793	1.73477	0.0676	2.41852
0.06809	0.41813	0.06812	9.59529	0.0681	1.38775	0.06945	1.38031	0.0681	-2.1174	0.06809	1.73714	0.06776	2.41872
0.06826	0.41157	0.06828	9.5705	0.06827	1.39313	0.06961	1.4748	0.06827	-2.12961	0.06826	1.73985	0.06793	2.41871
0.06843	0.40515	0.06845	9.54442	0.06844	1.39856	0.06978	1.5643	0.06843	-2.14224	0.06843	1.74596	0.0681	2.41874
0.06859	0.39867	0.06862	9.52245	0.0686	1.40435	0.06995	1.65789	0.0686	-2.15428	0.06859	1.75328	0.06826	2.41883
0.06876	0.39082	0.06878	9.50251	0.06877	1.41191	0.07011	1.77012	0.06877	-2.16325	0.06876	1.76174	0.06843	2.41894
0.06893	0.38322	0.06895	9.48115	0.06894	1.42085	0.07028	1.88645	0.06893	-2.17134	0.06893	1.77056	0.0686	2.41917
0.06909	0.37745	0.06912	9.45878	0.0691	1.42654	0.07045	2.00129	0.0691	-2.17909	0.06909	1.77928	0.06876	2.41962
0.06926	0.37167	0.06928	9.43676	0.06927	1.4301	0.07061	2.11196	0.06927	-2.18649	0.06926	1.78712	0.06893	2.42085
0.06943	0.36563	0.06945	9.41836	0.06944	1.43359	0.07078	2.22551	0.06943	-2.19247	0.06943	1.79482	0.0691	2.42233
0.06959	0.35917	0.06961	9.40109	0.0696	1.43458	0.07094	2.33299	0.0696	-2.19717	0.06959	1.80188	0.06926	2.42286
0.06976	0.35272	0.06978	9.38156	0.06977	1.43552	0.07111	2.44128	0.06977	-2.20148	0.06976	1.80896	0.06943	2.42235
0.06993	0.34634	0.06995	9.36038	0.06994	1.43506	0.07128	2.54241	0.06993	-2.20592	0.06992	1.81666	0.0696	2.42046
0.07009	0.33998	0.07011	9.33909	0.0701	1.43473	0.07144	2.64763	0.0701	-2.21041	0.07009	1.82552	0.06976	2.41737
0.07026	0.33299	0.07028	9.31727	0.07027	1.43532	0.07161	2.75249	0.07027	-2.21184	0.07026	1.8343	0.06993	2.41385
0.07042	0.32567	0.07045	9.29467	0.07043	1.43706	0.07178	2.85327	0.07043	-2.21243	0.07042	1.84332	0.07009	2.41175
0.07059	0.31915	0.07061	9.26824	0.0706	1.43929	0.07194	2.94442	0.0706	-2.21256	0.07059	1.85263	0.07026	2.41013
0.07076	0.31309	0.07078	9.24067	0.07077	1.44227	0.07211	3.03088	0.07076	-2.21187	0.07076	1.86182	0.07043	2.40979
0.07092	0.30689	0.07095	9.21642	0.07093	1.44532	0.07228	3.11778	0.07093	-2.21042	0.07092	1.87117	0.07059	2.40998
0.07109	0.30008	0.07111	9.19369	0.0711	1.44868	0.07244	3.21129	0.0711	-2.20791	0.07109	1.87746	0.07076	2.41006
0.07126	0.29346	0.07128	9.1687	0.07127	1.45222	0.07261	3.29518	0.07126	-2.20519	0.07126	1.88323	0.07093	2.40993
0.07142	0.28862	0.07145	9.14098	0.07143	1.45551	0.07278	3.3675	0.07143	-2.20115	0.07142	1.88958	0.07109	2.40943
0.07159	0.28404	0.07161	9.11546	0.0716	1.45895	0.07294	3.43729	0.0716	-2.19623	0.07159	1.89704	0.07126	2.40836
0.07176	0.27998	0.07178	9.0924	0.07177	1.46274	0.07311	3.51219	0.07176	-2.19199	0.07176	1.90426	0.07143	2.40713
0.07192	0.27641	0.07194	9.07032	0.07193	1.46657	0.07328	3.5966	0.07193	-2.18814	0.07192	1.91175	0.07159	2.40563
0.07209	0.27319	0.07211	9.04727	0.0721	1.47056	0.07344	3.64596	0.0721	-2.18456	0.07209	1.91914	0.07176	2.40392
0.07226	0.27021	0.07228	9.02355	0.07227	1.4746	0.07361	3.68167	0.07226	-2.182	0.07225	1.92516	0.07193	2.40253
0.07242	0.26727	0.07244	9.00157	0.07243	1.47857	0.07378	3.7187	0.07243	-2.17959	0.07242	1.93009	0.07209	2.40133
0.07259	0.26227	0.07261	8.98042	0.0726	1.48188	0.07394	3.75304	0.0726	-2.17684	0.07259	1.93161	0.07226	2.3999
0.07275	0.25685	0.07278	8.95856	0.07277	1.48443	0.07411	3.7861	0.07276	-2.17393	0.07275	1.93172	0.07242	2.39725
0.07292	0.25283	0.07294	8.9342	0.07293	1.48502	0.07427	3.79679	0.07293	-2.17243	0.07292	1.93184	0.07259	2.39413
0.07309	0.24911	0.07311	8.91002	0.0731	1.48454	0.07444	3.80752	0.07309	-2.17234	0.07309	1.93228	0.07276	2.39088
0.07325	0.24474	0.07328	8.8877	0.07327	1.48448	0.07461	3.81999	0.07326	-2.17291	0.07325	1.93277	0.07292	2.38764
0.07342	0.23947	0.07344	8.86591	0.07343	1.48571	0.07477	3.8456	0.07343	-2.17381	0.07342	1.93418	0.07309	2.3856
0.07359	0.23422	0.07361	8.8413	0.0736	1.48753	0.07494	3.87259	0.07359	-2.17481	0.07359	1.93546	0.07326	2.3848
0.07375	0.22921	0.07378	8.81451	0.07376	1.49135	0.07511	3.90157	0.07376	-2.17395	0.07375	1.93555	0.07342	2.38527
0.07392	0.22432	0.07394	8.78986	0.07393	1.4952	0.07527	3.93066	0.07393	-2.17257	0.07392	1.93322	0.07359	2.38679
0.07409	0.21973	0.07411	8.76679	0.0741	1.49863	0.07544	3.9624	0.07409	-2.17116	0.07409	1.93013	0.07376	2.38859
0.07425	0.21523	0.07427	8.74308	0.07426	1.50149	0.07561	3.99671	0.07426	-2.16974	0.07425	1.92632	0.07392	2.38987
0.07442	0.21145	0.07444	8.7158	0.07443	1.50345	0.07577	4.03128	0.07443	-2.16749	0.07442	1.92251	0.07409	2.39098
0.07459	0.20805	0.07461	8.68771	0.0746	1.50443	0.07594	4.06476	0.07459	-2.16374	0.07458	1.91878	0.07426	2.39078
0.07475	0.20467	0.07477	8.66408	0.07476	1.50564	0.07611	4.09988	0.07476	-2.16006	0.07475	1.91493	0.07442	2.39007
0.07492	0.20247	0.07494	8.64185	0.07493	1.5077	0.07627	4.1461	0.07493	-2.15729	0.07492	1.91101	0.07459	2.3905
0.07508	0.2006	0.07511	8.61714	0.0751	1.50999	0.07644	4.19156	0.07509	-2.15465	0.07508	1.90693	0.07475	2.39307
0.07525	0.19932	0.07527	8.59016	0.07526	1.51193	0.07661	4.23548	0.07526	-2.1517	0.07525	1.90345	0.07492	2.39644
0.07542	0.19816	0.07544	8.56411	0.07543	1.5137	0.07677	4.27802	0.07543	-2.14849	0.07542	1.90256	0.07509	2.40004
0.07558	0.19589	0.07561	8.5407	0.0756	1.51511	0.07694	4.32771	0.07559	-2.14665	0.07558	1.90134	0.07525	2.40367
0.07575	0.19235	0.07577	8.51808	0.07576	1.51565	0.07711	4.38691	0.07576	-2.14555	0.07575	1.899	0.07542	2.40683
0.07592	0.1881	0.07594	8.49305	0.07593	1.51601	0.07727	4.44291	0.07592	-2.14473	0.07592	1.89666	0.07559	2.40972
0.07608	0.18339	0.07611	8.46669	0.0761	1.51603	0.07744	4.4898	0.07609	-2.14473	0.07608	1.89566	0.07575	2.41289
0.07625	0.17862	0.07627	8.44177	0.07626	1.51634	0.0776	4.53707	0.07626	-2.14472	0.07625	1.89596	0.07592	2.4162
0.07642	0.17295	0.07644	8.41743	0.07643	1.51781	0.07777	4.59401	0.07642	-2.14372	0.07642	1.89765	0.07609	2.41978
0.07658	0.16705	0.07661	8.39139	0.07659	1.52023	0.07794	4.65738	0.07659	-2.14242	0.07658	1.90012	0.07625	2.42562
0.07675	0.16327	0.07677	8.36267	0.07676	1.52333	0.0781	4.72006	0.07676	-2.14028	0.07675	1.90295	0.07642	2.43272
0.07692	0.15977	0.07694	8.33396	0.07693	1.52675	0.07827	4.78334	0.07692	-2.13725	0.07691	1.90921	0.07659	2.44087
0.07708	0.15545	0.0771	8.30715	0.07709	1.53037	0.07844	4.84523	0.07709	-2.13262	0.07708	1.91608	0.07675	2.44957
0.07725	0.14963	0.07727	8.28092	0.07726	1.53464	0.0786	4.93435	0.07726	-2.12663	0.07725	1.9224	0.07692	2.45917
0.07742	0.14381	0.07744	8.25082	0.07743	1.53875	0.07877	5.02175	0.07742	-2.12033	0.07741	1.92898	0.07708	2.46985
0.07758	0.13898	0.0776	8.21832	0.07759	1.54152	0.07894	5.09621	0.07759	-2.11638	0.07758	1.9357	0.07725	2.47994
0.07775	0.13445	0.07777	8.18742	0.07776	1.54437	0.0791	5.16855	0.07776	-2.11299	0.07775	1.94257	0.07742	2.48873
0.07791	0.12977	0.07794	8.1585	0.07793	1.54727	0.07927	5.2499	0.07792	-2.11146	0.07791	1.9509	0.07758	2.49709
0.07808	0.1251	0.0781	8.12993	0.07809	1.55057	0.07944	5.3372	0.07809	-2.11045	0.07808	1.96132	0.07775	2.5103
0.07825	0.11995	0.07827	8.09933	0.07826	1.55408	0.0796	5.42508	0.07825	-2.10916	0.07825	1.97208	0.07792	2.52685
0.07841	0.11493	0.07844	8.06825	0.07843	1.55805	0.07977	5.50778	0.07842	-2.10734	0.07841	1.982	0.07808	2.54398
0.07858	0.10968	0.0786	8.0403	0.07859	1.56242	0.07994	5.59098	0.07859	-2.10622	0.07858	1.99224	0.07825	2.56158
0.07875	0.10377	0.07877	8.01448	0.07876	1.5679	0.0801	5.68311	0.07875	-2.1066	0.07875	2.00281	0.07842	2.58009
0.07891	0.09745	0.07894	7.98633	0.07893	1.57406	0.08027	5.77163	0.07892	-2.10735	0.07891	2.01336	0.07858	2.60219
0.07908	0.08984	0.0791	7.95572	0.07909	1.57939	0.08044	5.85251	0.07909	-2.1088	0.07908	2.02349	0.07875	2.62466
0.07925	0.08248	0.07927	7.92735	0.07926	1.58442	0.0806	5.93247	0.07925	-2.11063	0.07924	2.03582	0.07892	2.64491
0.07941	0.07366	0.07943	7.90211	0.07943	1.58951	0.08077	6.01399	0.07942	-2.11288	0.07941	2.04743	0.07908	2.66444
0.07958	0.06413	0.0796	7.87714	0.07959	1.59472	0.08093	6.10419	0.07959	-2.11528	0.07958	2.05667	0.07925	2.68573
0.07975	0.05555	0.07977	7.8489	0.07976	1.60022	0.0811	6.18672	0.07975	-2.11774	0.07974	2.06584	0.07941	2.70885
0.07991	0.04807	0.07993	7.81905	0.07992	1.60674	0.08127	6.2606	0.07992	-2.12004	0.07991	2.07472	0.07958	2.73251
0.08008	0.04079	0.0801	7.79139	0.08009	1.61326	0.08143	6.33249	0.08009	-2.12213	0.08008	2.08338	0.07975	2.7563
0.08024	0.03192	0.08027	7.76487	0.08026	1.62008	0.0816	6.41038	0.08025	-2.1234	0.08024	2.09117	0.07991	2.77978
0.08041	0.02228	0.08043	7.73783	0.08042	1.6274	0.08177	6.49641	0.08042	-2.12445	0.08041	2.09798	0.08008	2.80612
0.08058	0.01406	0.0806	7.70965	0.08059	1.63341	0.08193	6.57053	0.08059	-2.12596	0.08058	2.10445	0.08025	2.83413
0.08074	0.00569	0.08077	7.68273	0.08076	1.63864	0.0821	6.64084	0.08075	-2.12792	0.08074	2.11192	0.08041	2.86117
0.08091	-0.00244	0.08093	7.65864	0.08092	1.64462	0.08227	6.70949	0.08092	-2.13085	0.08091	2.11945	0.08058	2.8873
0.08108	-0.01073	0.0811	7.63611	0.08109	1.65271	0.08243	6.78972	0.08108	-2.13456	0.08108	2.12373	0.08075	2.91392
0.08124	-0.0182	0.08127	7.61258	0.08126	1.6618	0.0826	6.86984	0.08125	-2.13853	0.08124	2.12711	0.08091	2.94249
0.08141	-0.02374	0.08143	7.58711	0.08142	1.67013	0.08277	6.9241	0.08142	-2.1426	0.08141	2.1315	0.08108	2.97299
0.08158	-0.02926	0.0816	7.5626	0.08159	1.67817	0.08293	6.97866	0.08158	-2.14663	0.08158	2.13952	0.08125	3.00274
0.08174	-0.03488	0.08176	7.54184	0.08176	1.68628	0.0831	7.03617	0.08175	-2.14849	0.08174	2.14774	0.08141	3.03167
0.08191	-0.04052	0.08193	7.52168	0.08192	1.69374	0.08327	7.09476	0.08192	-2.14968	0.08191	2.15592	0.08158	3.06195
0.08208	-0.04608	0.0821	7.5001	0.08209	1.70099	0.08343	7.14732	0.08208	-2.15105	0.08207	2.16383	0.08174	3.09737
0.08224	-0.05158	0.08226	7.47545	0.08226	1.70813	0.0836	7.19026	0.08225	-2.15271	0.08224	2.17563	0.08191	3.13307
0.08241	-0.05724	0.08243	7.45176	0.08242	1.71561	0.08376	7.23454	0.08242	-2.15475	0.08241	2.18988	0.08208	3.16326
0.08257	-0.06298	0.0826	7.43009	0.08259	1.72527	0.08393	7.27334	0.08258	-2.15734	0.08257	2.20441	0.08224	3.19266
0.08274	-0.06876	0.08276	7.40785	0.08276	1.73634	0.0841	7.31025	0.08275	-2.16003	0.08274	2.21901	0.08241	3.22353
0.08291	-0.07382	0.08293	7.38472	0.08292	1.74623	0.08426	7.34052	0.08292	-2.16279	0.08291	2.23416	0.08258	3.25777
0.08307	-0.07866	0.0831	7.3614	0.08309	1.75517	0.08443	7.36854	0.08308	-2.16562	0.08307	2.25267	0.08274	3.28961
0.08324	-0.08399	0.08326	7.34089	0.08325	1.76451	0.0846	7.3967	0.08325	-2.16772	0.08324	2.27193	0.08291	3.31822
0.08341	-0.08973	0.08343	7.32156	0.08342	1.77602	0.08476	7.42479	0.08342	-2.16944	0.08341	2.28964	0.08308	3.34671
0.08357	-0.0947	0.0836	7.30148	0.08359	1.78814	0.08493	7.45245	0.08358	-2.17113	0.08357	2.30719	0.08324	3.37554
0.08374	-0.09833	0.08376	7.27861	0.08375	1.79998	0.0851	7.47097	0.08375	-2.17296	0.08374	2.32607	0.08341	3.40404
0.08391	-0.10192	0.08393	7.25636	0.08392	1.81209	0.08526	7.48965	0.08391	-2.17484	0.08391	2.34818	0.08358	3.43051
0.08407	-0.10593	0.08409	7.23805	0.08409	1.82433	0.08543	7.51006	0.08408	-2.17685	0.08407	2.37066	0.08374	3.45575
0.08424	-0.11016	0.08426	7.21964	0.08425	1.83736	0.0856	7.53252	0.08425	-2.17889	0.08424	2.39308	0.08391	3.48168
0.08441	-0.11253	0.08443	7.20124	0.08442	1.84996	0.08576	7.54887	0.08441	-2.18059	0.0844	2.41552	0.08407	3.50999
0.08457	-0.11459	0.08459	7.18292	0.08459	1.86177	0.08593	7.56014	0.08458	-2.18181	0.08457	2.43973	0.08424	3.53729
0.08474	-0.11677	0.08476	7.16593	0.08475	1.87447	0.0861	7.57231	0.08475	-2.18246	0.08474	2.46496	0.08441	3.56033
0.08491	-0.1193	0.08493	7.1502	0.08492	1.88953	0.08626	7.60369	0.08491	-2.18266	0.0849	2.48954	0.08457	3.58338
0.08507	-0.12173	0.08509	7.13377	0.08509	1.90617	0.08643	7.63865	0.08508	-2.18276	0.08507	2.51387	0.08474	3.60835
0.08524	-0.12412	0.08526	7.11426	0.08525	1.92026	0.0866	7.66592	0.08525	-2.18412	0.08524	2.53771	0.08491	3.63609
0.0854	-0.1265	0.08543	7.09355	0.08542	1.93321	0.08676	7.69165	0.08541	-2.18594	0.0854	2.56524	0.08507	3.66234
0.08557	-0.12905	0.08559	7.07534	0.08559	1.94658	0.08693	7.7167	0.08558	-2.18765	0.08557	2.59237	0.08524	3.68655
0.08574	-0.13168	0.08576	7.05856	0.08575	1.96115	0.08709	7.73869	0.08575	-2.18928	0.08574	2.61491	0.08541	3.71095
0.0859	-0.13416	0.08593	7.04119	0.08592	1.97637	0.08726	7.76048	0.08591	-2.19057	0.0859	2.63779	0.08557	3.73615
0.08607	-0.13657	0.08609	7.02305	0.08609	1.99189	0.08743	7.77891	0.08608	-2.19099	0.08607	2.65878	0.08574	3.76021
0.08624	-0.13899	0.08626	7.00588	0.08625	2.00784	0.08759	7.7973	0.08624	-2.1909	0.08624	2.67904	0.08591	3.77974
0.0864	-0.1429	0.08643	6.99224	0.08642	2.02564	0.08776	7.81298	0.08641	-2.19057	0.0864	2.69502	0.08607	3.79679
0.08657	-0.14651	0.08659	6.97804	0.08658	2.0452	0.08793	7.82748	0.08658	-2.19006	0.08657	2.70871	0.08624	3.81427
0.08674	-0.15008	0.08676	6.96163	0.08675	2.06262	0.08809	7.84659	0.08674	-2.18965	0.08673	2.72175	0.0864	3.83356
0.0869	-0.15364	0.08692	6.94301	0.08692	2.07845	0.08826	7.86873	0.08691	-2.18941	0.0869	2.72974	0.08657	3.85141
0.08707	-0.15753	0.08709	6.92582	0.08708	2.09442	0.08843	7.88966	0.08708	-2.1892	0.08707	2.73668	0.08674	3.86527
0.08724	-0.16238	0.08726	6.90971	0.08725	2.11195	0.08859	7.89831	0.08724	-2.18893	0.08723	2.73982	0.0869	3.87938
0.0874	-0.16662	0.08742	6.89312	0.08742	2.13026	0.08876	7.90723	0.08741	-2.18869	0.0874	2.74212	0.08707	3.89293
0.08757	-0.17017	0.08759	6.87386	0.08758	2.14659	0.08893	7.91538	0.08758	-2.18898	0.08757	2.74326	0.08724	3.90589
0.08773	-0.17381	0.08776	6.85541	0.08775	2.16245	0.08909	7.92299	0.08774	-2.19001	0.08773	2.74164	0.0874	3.91878
0.0879	-0.17699	0.08792	6.83963	0.08792	2.17921	0.08926	7.92074	0.08791	-2.19096	0.0879	2.73838	0.08757	3.9311
0.08807	-0.18003	0.08809	6.82429	0.08808	2.20017	0.08943	7.9048	0.08808	-2.19181	0.08807	2.73181	0.08774	3.94378
0.08823	-0.18264	0.08826	6.80816	0.08825	2.22062	0.08959	7.88747	0.08824	-2.19294	0.08823	2.72512	0.0879	3.95772
0.0884	-0.18522	0.08842	6.7898	0.08842	2.24055	0.08976	7.86774	0.08841	-2.19479	0.0884	2.71656	0.08807	3.97071
0.08857	-0.18793	0.08859	6.77178	0.08858	2.2602	0.08993	7.84758	0.08858	-2.19727	0.08857	2.70702	0.08824	3.98133
0.08873	-0.19153	0.08876	6.75383	0.08875	2.28126	0.09009	7.81432	0.08874	-2.20021	0.08873	2.69592	0.0884	3.99174
0.0889	-0.19493	0.08892	6.73545	0.08892	2.3023	0.09026	7.7762	0.08891	-2.20345	0.0889	2.68391	0.08857	4.0026
0.08907	-0.19817	0.08909	6.7155	0.08908	2.32087	0.09042	7.72062	0.08907	-2.20692	0.08906	2.67136	0.08873	4.0134
0.08923	-0.20144	0.08925	6.69557	0.08925	2.33743	0.09059	7.65834	0.08924	-2.21082	0.08923	2.65889	0.0889	4.02229
0.0894	-0.20546	0.08942	6.67874	0.08942	2.35606	0.09076	7.5979	0.08941	-2.21423	0.0894	2.64607	0.08907	4.02817
0.08957	-0.20993	0.08959	6.66372	0.08958	2.38059	0.09092	7.537	0.08957	-2.21657	0.08956	2.63026	0.08923	4.0339
0.08973	-0.21427	0.08975	6.64752	0.08975	2.40579	0.09109	7.47694	0.08974	-2.21879	0.08973	2.61411	0.0894	4.03946
0.0899	-0.21841	0.08992	6.62833	0.08991	2.42989	0.09126	7.41965	0.08991	-2.22078	0.0899	2.59721	0.08957	4.04433
0.09006	-0.22285	0.09009	6.60931	0.09008	2.45407	0.09142	7.36094	0.09007	-2.22265	0.09006	2.58004	0.08973	4.04827
0.09023	-0.22738	0.09025	6.59102	0.09025	2.47894	0.09159	7.2729	0.09024	-2.22529	0.09023	2.56352	0.0899	4.05176
0.0904	-0.2319	0.09042	6.57247	0.09041	2.50524	0.09176	7.16977	0.09041	-2.22866	0.0904	2.54833	0.09007	4.05579
0.09056	-0.235	0.09059	6.5532	0.09058	2.52969	0.09192	7.06922	0.09057	-2.23199	0.09056	2.5337	0.09023	4.06087
0.09073	-0.23802	0.09075	6.53341	0.09075	2.55154	0.09209	6.97166	0.09074	-2.23519	0.09073	2.5165	0.0904	4.06533
0.0909	-0.24149	0.09092	6.51562	0.09091	2.57493	0.09226	6.87445	0.09091	-2.23826	0.0909	2.49808	0.09057	4.06827
0.09106	-0.24512	0.09109	6.4999	0.09108	2.60141	0.09242	6.77496	0.09107	-2.24115	0.09106	2.48512	0.09073	4.07095
0.09123	-0.24837	0.09125	6.48419	0.09125	2.62904	0.09259	6.67328	0.09124	-2.24398	0.09123	2.47323	0.0909	4.07309
0.0914	-0.25095	0.09142	6.46807	0.09141	2.65514	0.09276	6.57853	0.0914	-2.24728	0.09139	2.46065	0.09106	4.07486
0.09156	-0.25345	0.09158	6.45228	0.09158	2.68024	0.09292	6.48624	0.09157	-2.25136	0.09156	2.44627	0.09123	4.07707
0.09173	-0.25536	0.09175	6.43857	0.09175	2.70741	0.09309	6.38992	0.09174	-2.25496	0.09173	2.43322	0.0914	4.0795
0.0919	-0.25725	0.09192	6.42565	0.09191	2.73908	0.09326	6.28319	0.0919	-2.2578	0.09189	2.42251	0.09156	4.08094
0.09206	-0.2595	0.09208	6.41219	0.09208	2.76923	0.09342	6.17897	0.09207	-2.26052	0.09206	2.41234	0.09173	4.08026
0.09223	-0.26187	0.09225	6.39758	0.09225	2.79564	0.09359	6.08677	0.09224	-2.26291	0.09223	2.39868	0.0919	4.07871
0.0924	-0.26344	0.09242	6.38429	0.09241	2.82291	0.09375	5.99912	0.0924	-2.26479	0.09239	2.38256	0.09206	4.07628
0.09256	-0.26294	0.09258	6.37276	0.09258	2.85376	0.09392	5.90938	0.09257	-2.26594	0.09256	2.36828	0.09223	4.07369
0.09273	-0.26215	0.09275	6.36097	0.09275	2.88823	0.09409	5.81751	0.09274	-2.26663	0.09273	2.35486	0.0924	4.07169
0.09289	-0.26064	0.09292	6.34822	0.09291	2.92178	0.09425	5.73425	0.0929	-2.2675	0.09289	2.34162	0.09256	4.07027
0.09306	-0.25927	0.09308	6.33567	0.09308	2.95373	0.09442	5.65708	0.09307	-2.26876	0.09306	2.32585	0.09273	4.06837
0.09323	-0.25901	0.09325	6.32457	0.09324	2.98592	0.09459	5.58011	0.09324	-2.26987	0.09323	2.31019	0.0929	4.0659
0.09339	-0.25961	0.09342	6.31389	0.09341	3.02442	0.09475	5.49382	0.0934	-2.27053	0.09339	2.2943	0.09306	4.06323
0.09356	-0.2595	0.09358	6.30273	0.09358	3.06534	0.09492	5.40276	0.09357	-2.27115	0.09356	2.27876	0.09323	4.05975
0.09373	-0.25894	0.09375	6.28974	0.09374	3.10064	0.09509	5.31022	0.09374	-2.27202	0.09372	2.26282	0.09339	4.05585
0.09389	-0.25837	0.09391	6.27785	0.09391	3.13417	0.09525	5.21833	0.0939	-2.27325	0.09389	2.24638	0.09356	4.05232
0.09406	-0.25771	0.09408	6.26841	0.09408	3.16901	0.09542	5.12448	0.09407	-2.27473	0.09406	2.23096	0.09373	4.04884
0.09423	-0.25697	0.09425	6.25913	0.09424	3.20982	0.09559	5.02578	0.09423	-2.27644	0.09422	2.21581	0.09389	4.04517
0.09439	-0.25601	0.09441	6.24879	0.09441	3.25067	0.09575	4.94584	0.0944	-2.27762	0.09439	2.20103	0.09406	4.04113
0.09456	-0.25516	0.09458	6.23797	0.09458	3.28999	0.09592	4.88899	0.09457	-2.2775	0.09456	2.18606	0.09423	4.03653
0.09473	-0.25478	0.09475	6.22778	0.09474	3.3293	0.09609	4.83951	0.09473	-2.27681	0.09472	2.17097	0.09439	4.03077
0.09489	-0.25519	0.09491	6.21875	0.09491	3.37206	0.09625	4.77706	0.0949	-2.27622	0.09489	2.15844	0.09456	4.02476
0.09506	-0.25537	0.09508	6.20914	0.09508	3.41933	0.09642	4.70593	0.09507	-2.27566	0.09506	2.14674	0.09473	4.01822
0.09522	-0.25526	0.09525	6.19844	0.09524	3.46341	0.09659	4.63596	0.09523	-2.27542	0.09522	2.13483	0.09489	4.01147
0.09539	-0.25504	0.09541	6.1879	0.09541	3.50473	0.09675	4.56725	0.0954	-2.27568	0.09539	2.12237	0.09506	4.0052
0.09556	-0.25429	0.09558	6.17767	0.09558	3.54602	0.09692	4.49965	0.09557	-2.27545	0.09556	2.11047	0.09523	3.99928
0.09572	-0.25343	0.09575	6.16747	0.09574	3.59154	0.09708	4.43417	0.09573	-2.27438	0.09572	2.10023	0.09539	3.99395
0.09589	-0.25307	0.09591	6.15638	0.09591	3.63764	0.09725	4.3725	0.0959	-2.27317	0.09589	2.09038	0.09556	3.98943
0.09606	-0.25281	0.09608	6.14426	0.09607	3.67839	0.09742	4.32005	0.09607	-2.27158	0.09605	2.08266	0.09572	3.98639
0.09622	-0.25235	0.09625	6.13262	0.09624	3.71832	0.09758	4.27239	0.09623	-2.26979	0.09622	2.07608	0.09589	3.98536
0.09639	-0.2513	0.09641	6.12177	0.09641	3.76003	0.09775	4.21528	0.0964	-2.26835	0.09639	2.07315	0.09606	3.98486
0.09656	-0.25113	0.09658	6.11063	0.09657	3.80518	0.09792	4.1494	0.09657	-2.26713	0.09655	2.07219	0.09622	3.98558
0.09672	-0.25294	0.09674	6.09827	0.09674	3.84735	0.09808	4.08265	0.09673	-2.26629	0.09672	2.07156	0.09639	3.98764
0.09689	-0.25505	0.09691	6.08566	0.09691	3.88434	0.09825	4.01931	0.0969	-2.26613	0.09689	2.07263	0.09656	3.98914
0.09706	-0.25826	0.09708	6.07368	0.09707	3.92022	0.09842	3.95657	0.09706	-2.26589	0.09705	2.07409	0.09672	3.99004
0.09722	-0.26224	0.09724	6.06211	0.09724	3.95857	0.09858	3.88801	0.09723	-2.26529	0.09722	2.07774	0.09689	3.98988
0.09739	-0.26522	0.09741	6.05025	0.09741	3.99789	0.09875	3.81864	0.0974	-2.26475	0.09739	2.08148	0.09706	3.98721
0.09755	-0.26728	0.09758	6.0384	0.09757	4.0313	0.09892	3.75917	0.09756	-2.26485	0.09755	2.08578	0.09722	3.98336
0.09772	-0.26907	0.09774	6.02747	0.09774	4.06256	0.09908	3.70359	0.09773	-2.26557	0.09772	2.09052	0.09739	3.98042
0.09789	-0.26997	0.09791	6.01787	0.09791	4.09399	0.09925	3.64536	0.0979	-2.26599	0.09789	2.09571	0.09756	3.97787
0.09805	-0.27076	0.09808	6.00841	0.09807	4.13103	0.09942	3.58595	0.09806	-2.26613	0.09805	2.10123	0.09772	3.97647
0.09822	-0.27163	0.09824	5.99868	0.09824	4.16731	0.09958	3.52683	0.09823	-2.26639	0.09822	2.10684	0.09789	3.97659
0.09839	-0.27261	0.09841	5.98869	0.09841	4.19772	0.09975	3.47145	0.0984	-2.26687	0.09839	2.11272	0.09805	3.97712
0.09855	-0.274	0.09858	5.9795	0.09857	4.22799	0.09992	3.41779	0.09856	-2.26812	0.09855	2.11858	0.09822	3.97793
0.09872	-0.27581	0.09874	5.97127	0.09874	4.25782	0.10008	3.35442	0.09873	-2.27059	0.09872	2.12464	0.09839	3.97883
0.09889	-0.27711	0.09891	5.9619	0.09891	4.28754	0.10025	3.2836	0.0989	-2.27361	0.09888	2.13066	0.09855	3.97987
0.09905	-0.27761	0.09907	5.95042	0.09907	4.31359	0.10041	3.22412	0.09906	-2.27714	0.09905	2.1376	0.09872	3.98119
0.09922	-0.27792	0.09924	5.93804	0.09924	4.33607	0.10058	3.17425	0.09923	-2.28115	0.09922	2.14655	0.09889	3.98316
0.09939	-0.27735	0.09941	5.92661	0.0994	4.35789	0.10075	3.12594	0.09939	-2.28481	0.09938	2.156	0.09905	3.98568
0.09955	-0.27661	0.09957	5.91575	0.09957	4.38258	0.10091	3.07809	0.09956	-2.28811	0.09955	2.16607	0.09922	3.98838
0.09972	-0.27639	0.09974	5.90478	0.09974	4.40751	0.10108	3.03083	0.09973	-2.2915	0.09972	2.17589	0.09939	3.99125
0.09989	-0.27643	0.09991	5.8934	0.0999	4.42769	0.10125	2.98075	0.09989	-2.29514	0.09988	2.18572	0.09955	3.99369
0.10005	-0.27734	0.10007	5.8829	0.10007	4.44812	0.10141	2.9296	0.10006	-2.2991	0.10005	2.19565	0.09972	3.99533
0.10022	-0.28006	0.10024	5.87345	0.10024	4.46763	0.10158	2.87613	0.10023	-2.30345	0.10022	2.20329	0.09989	3.99674
0.10038	-0.28315	0.10041	5.86408	0.1004	4.48593	0.10175	2.8215	0.10039	-2.30808	0.10038	2.20973	0.10005	3.99638
0.10055	-0.28678	0.10057	5.85529	0.10057	4.50191	0.10191	2.77538	0.10056	-2.31215	0.10055	2.21626	0.10022	3.99417
0.10072	-0.29002	0.10074	5.8476	0.10074	4.51444	0.10208	2.73859	0.10073	-2.31506	0.10072	2.22461	0.10038	3.9905
0.10088	-0.29205	0.10091	5.841	0.1009	4.52629	0.10225	2.70319	0.10089	-2.31724	0.10088	2.2328	0.10055	3.98552
0.10105	-0.29277	0.10107	5.83504	0.10107	4.53619	0.10241	2.67355	0.10106	-2.31884	0.10105	2.23937	0.10072	3.98099
0.10122	-0.29225	0.10124	5.82736	0.10124	4.54474	0.10258	2.64695	0.10123	-2.32027	0.10121	2.24552	0.10088	3.97733
0.10138	-0.29082	0.1014	5.81693	0.1014	4.55048	0.10275	2.62618	0.10139	-2.32165	0.10138	2.25173	0.10105	3.97534
0.10155	-0.28962	0.10157	5.8065	0.10157	4.5552	0.10291	2.60699	0.10156	-2.32283	0.10155	2.25804	0.10122	3.97593
0.10172	-0.28893	0.10174	5.79651	0.10174	4.5598	0.10308	2.5886	0.10173	-2.32327	0.10171	2.26409	0.10138	3.97773
0.10188	-0.28864	0.1019	5.78641	0.1019	4.56396	0.10324	2.57056	0.10189	-2.32314	0.10188	2.26984	0.10155	3.97953
0.10205	-0.28919	0.10207	5.77648	0.10207	4.56757	0.10341	2.5547	0.10206	-2.32292	0.10205	2.27544	0.10172	3.98129
0.10222	-0.2899	0.10224	5.76679	0.10224	4.56556	0.10358	2.54202	0.10222	-2.32254	0.10221	2.28117	0.10188	3.98171
0.10238	-0.29097	0.1024	5.75761	0.1024	4.56292	0.10374	2.53059	0.10239	-2.32196	0.10238	2.28712	0.10205	3.98079
0.10255	-0.29247	0.10257	5.74887	0.10257	4.55935	0.10391	2.51049	0.10256	-2.32116	0.10255	2.29301	0.10222	3.97983
0.10271	-0.29357	0.10274	5.73943	0.10273	4.5547	0.10408	2.48274	0.10272	-2.32026	0.10271	2.29875	0.10238	3.97962
0.10288	-0.29416	0.1029	5.72851	0.1029	4.54996	0.10424	2.46497	0.10289	-2.31922	0.10288	2.30475	0.10255	3.9799
0.10305	-0.29452	0.10307	5.7185	0.10307	4.54505	0.10441	2.45378	0.10306	-2.31798	0.10305	2.31164	0.10271	3.98003
0.10321	-0.29413	0.10324	5.7111	0.10323	4.54017	0.10458	2.44416	0.10322	-2.31619	0.10321	2.31863	0.10288	3.98007
0.10338	-0.29364	0.1034	5.70457	0.1034	4.53262	0.10474	2.44162	0.10339	-2.3139	0.10338	2.32404	0.10305	3.97904
0.10355	-0.29398	0.10357	5.69673	0.10357	4.5248	0.10491	2.44127	0.10356	-2.31166	0.10354	2.32834	0.10321	3.97639
0.10371	-0.29462	0.10373	5.68756	0.10373	4.51405	0.10508	2.43922	0.10372	-2.30949	0.10371	2.33129	0.10338	3.973
0.10388	-0.29589	0.1039	5.67866	0.1039	4.50248	0.10524	2.43654	0.10389	-2.30723	0.10388	2.33218	0.10355	3.96939
0.10405	-0.29838	0.10407	5.67019	0.10407	4.4905	0.10541	2.43283	0.10406	-2.30461	0.10404	2.33251	0.10371	3.96563
0.10421	-0.2999	0.10423	5.66147	0.10423	4.47684	0.10558	2.4274	0.10422	-2.30182	0.10421	2.33291	0.10388	3.96133
0.10438	-0.29973	0.1044	5.65286	0.1044	4.46368	0.10574	2.42402	0.10439	-2.29863	0.10438	2.33325	0.10405	3.95657
0.10455	-0.29966	0.10457	5.64408	0.10457	4.45116	0.10591	2.42303	0.10455	-2.29475	0.10454	2.3328	0.10421	3.95375
0.10471	-0.29995	0.10473	5.63474	0.10473	4.43912	0.10608	2.42242	0.10472	-2.29159	0.10471	2.33149	0.10438	3.95248
0.10488	-0.30096	0.1049	5.62523	0.1049	4.4259	0.10624	2.41987	0.10489	-2.28937	0.10488	2.32908	0.10455	3.95106
0.10504	-0.3032	0.10507	5.61479	0.10507	4.41275	0.10641	2.41656	0.10505	-2.2873	0.10504	2.32566	0.10471	3.94936
0.10521	-0.30642	0.10523	5.60322	0.10523	4.40254	0.10657	2.40643	0.10522	-2.28445	0.10521	2.32226	0.10488	3.94709
0.10538	-0.30934	0.1054	5.59295	0.1054	4.39282	0.10674	2.39462	0.10539	-2.28094	0.10538	2.31898	0.10504	3.94384
0.10554	-0.31182	0.10557	5.58521	0.10557	4.38344	0.10691	2.37984	0.10555	-2.27759	0.10554	2.3157	0.10521	3.94016
0.10571	-0.31391	0.10573	5.57789	0.10573	4.37095	0.10707	2.35922	0.10572	-2.27423	0.10571	2.31223	0.10538	3.93651
0.10588	-0.31552	0.1059	5.56943	0.1059	4.35871	0.10724	2.33621	0.10589	-2.2704	0.10587	2.30869	0.10554	3.93291
0.10604	-0.31709	0.10607	5.56049	0.10606	4.34663	0.10741	2.31332	0.10605	-2.26551	0.10604	2.3044	0.10571	3.92922
0.10621	-0.31848	0.10623	5.55153	0.10623	4.33465	0.10757	2.29003	0.10622	-2.26005	0.10621	2.29922	0.10588	3.92551
0.10638	-0.31961	0.1064	5.54232	0.1064	4.32094	0.10774	2.26585	0.10639	-2.25468	0.10637	2.29386	0.10604	3.92195
0.10654	-0.32034	0.10656	5.53267	0.10656	4.305	0.10791	2.24169	0.10655	-2.24937	0.10654	2.28835	0.10621	3.9187
0.10671	-0.32057	0.10673	5.52325	0.10673	4.29051	0.10807	2.22666	0.10672	-2.24453	0.10671	2.28331	0.10638	3.91556
0.10688	-0.32121	0.1069	5.51476	0.1069	4.27668	0.10824	2.21804	0.10689	-2.23992	0.10687	2.27976	0.10654	3.91173
0.10704	-0.32283	0.10706	5.50743	0.10706	4.26295	0.10841	2.21026	0.10705	-2.23568	0.10704	2.27709	0.10671	3.90735
0.10721	-0.3252	0.10723	5.50067	0.10723	4.24591	0.10857	2.20369	0.10722	-2.23174	0.10721	2.27355	0.10688	3.90361
0.10738	-0.32824	0.1074	5.49303	0.1074	4.22801	0.10874	2.19621	0.10738	-2.2276	0.10737	2.26942	0.10704	3.90074
0.10754	-0.33165	0.10756	5.48448	0.10756	4.21352	0.10891	2.18072	0.10755	-2.22165	0.10754	2.26456	0.10721	3.89933
0.10771	-0.33459	0.10773	5.47746	0.10773	4.19941	0.10907	2.16395	0.10772	-2.21471	0.10771	2.25849	0.10737	3.89956
0.10787	-0.33686	0.1079	5.47148	0.1079	4.18466	0.10924	2.14932	0.10788	-2.20794	0.10787	2.25342	0.10754	3.90031
0.10804	-0.33836	0.10806	5.4653	0.10806	4.16932	0.10941	2.14006	0.10805	-2.20114	0.10804	2.25039	0.10771	3.90187
0.10821	-0.33868	0.10823	5.45876	0.10823	4.15439	0.10957	2.13301	0.10822	-2.19459	0.1082	2.24801	0.10787	3.90397
0.10837	-0.33907	0.1084	5.45175	0.1084	4.14188	0.10974	2.12749	0.10838	-2.18826	0.10837	2.24559	0.10804	3.90666
0.10854	-0.33966	0.10856	5.44468	0.10856	4.12942	0.1099	2.12222	0.10855	-2.18261	0.10854	2.24324	0.10821	3.90977
0.10871	-0.3403	0.10873	5.43769	0.10873	4.1145	0.11007	2.12204	0.10872	-2.17755	0.1087	2.24171	0.10837	3.91146
0.10887	-0.34058	0.10889	5.42939	0.1089	4.09922	0.11024	2.12803	0.10888	-2.17273	0.10887	2.24092	0.10854	3.90999
0.10904	-0.34059	0.10906	5.41985	0.10906	4.08321	0.1104	2.13722	0.10905	-2.16856	0.10904	2.23964	0.10871	3.9075
0.10921	-0.34011	0.10923	5.41081	0.10923	4.06856	0.11057	2.14707	0.10922	-2.16485	0.1092	2.23731	0.10887	3.90534
0.10937	-0.33881	0.10939	5.40317	0.10939	4.0543	0.11074	2.15663	0.10938	-2.1621	0.10937	2.23437	0.10904	3.90329
0.10954	-0.33748	0.10956	5.39574	0.10956	4.03852	0.1109	2.18025	0.10955	-2.15992	0.10954	2.23139	0.10921	3.89751
0.10971	-0.33654	0.10973	5.38842	0.10973	4.02223	0.11107	2.2117	0.10972	-2.1576	0.1097	2.22836	0.10937	3.88858
0.10987	-0.33573	0.10989	5.38123	0.10989	4.00963	0.11124	2.2483	0.10988	-2.15478	0.10987	2.22429	0.10954	3.8786
0.11004	-0.33557	0.11006	5.37508	0.11006	3.99704	0.1114	2.2877	0.11005	-2.15215	0.11004	2.21908	0.1097	3.86877
0.1102	-0.33613	0.11023	5.36974	0.11023	3.98057	0.11157	2.32673	0.11021	-2.15073	0.1102	2.21449	0.10987	3.85907
0.11037	-0.33689	0.11039	5.36357	0.11039	3.96213	0.11174	2.36163	0.11038	-2.14987	0.11037	2.21083	0.11004	3.84687
0.11054	-0.33778	0.11056	5.35604	0.11056	3.94566	0.1119	2.39912	0.11055	-2.14933	0.11053	2.20734	0.1102	3.83312
0.1107	-0.33872	0.11073	5.34849	0.11073	3.93144	0.11207	2.43762	0.11071	-2.1491	0.1107	2.20406	0.11037	3.81894
0.11087	-0.33978	0.11089	5.34087	0.11089	3.91629	0.11224	2.47485	0.11088	-2.14859	0.11087	2.20056	0.11054	3.80495
0.11104	-0.34036	0.11106	5.33303	0.11106	3.90127	0.1124	2.50793	0.11105	-2.14773	0.11103	2.19545	0.1107	3.79024
0.1112	-0.34003	0.11122	5.32559	0.11123	3.88698	0.11257	2.53816	0.11121	-2.14678	0.1112	2.18923	0.11087	3.77581
0.11137	-0.33932	0.11139	5.31805	0.11139	3.87591	0.11274	2.56619	0.11138	-2.14566	0.11137	2.1828	0.11104	3.76096
0.11154	-0.33939	0.11156	5.31172	0.11156	3.86436	0.1129	2.59487	0.11155	-2.1446	0.11153	2.17569	0.1112	3.74489
0.1117	-0.34039	0.11172	5.30616	0.11173	3.85116	0.11307	2.62294	0.11171	-2.14528	0.1117	2.16919	0.11137	3.72879
0.11187	-0.34201	0.11189	5.30015	0.11189	3.83451	0.11323	2.64504	0.11188	-2.14677	0.11187	2.16404	0.11154	3.70793
0.11204	-0.34415	0.11206	5.29376	0.11206	3.81723	0.1134	2.66325	0.11205	-2.14915	0.11203	2.15918	0.1117	3.68571
0.1122	-0.34637	0.11222	5.28746	0.11222	3.8016	0.11357	2.67683	0.11221	-2.15281	0.1122	2.15319	0.11187	3.66248
0.11237	-0.34871	0.11239	5.28166	0.11239	3.78498	0.11373	2.68901	0.11238	-2.15659	0.11237	2.14643	0.11203	3.63856
0.11253	-0.35105	0.11256	5.2761	0.11256	3.76873	0.1139	2.69975	0.11254	-2.16	0.11253	2.13963	0.1122	3.61583
0.1127	-0.35317	0.11272	5.27111	0.11272	3.75223	0.11407	2.70673	0.11271	-2.16338	0.1127	2.13283	0.11237	3.59228
0.11287	-0.35515	0.11289	5.26614	0.11289	3.73825	0.11423	2.70789	0.11288	-2.16612	0.11287	2.12621	0.11253	3.56965
0.11303	-0.35688	0.11306	5.26251	0.11306	3.72503	0.1144	2.70281	0.11304	-2.16855	0.11303	2.12003	0.1127	3.55023
0.1132	-0.3583	0.11322	5.26024	0.11322	3.71066	0.11457	2.69714	0.11321	-2.17017	0.1132	2.11478	0.11287	3.53238
0.11337	-0.3602	0.11339	5.25819	0.11339	3.69315	0.11473	2.69091	0.11338	-2.17137	0.11336	2.11062	0.11303	3.51405
0.11353	-0.36292	0.11356	5.25606	0.11356	3.67603	0.1149	2.68465	0.11354	-2.17273	0.11353	2.10696	0.1132	3.49473
0.1137	-0.36591	0.11372	5.25388	0.11372	3.66039	0.11507	2.66336	0.11371	-2.17463	0.1137	2.10464	0.11337	3.47938
0.11387	-0.36953	0.11389	5.25145	0.11389	3.64407	0.11523	2.63771	0.11388	-2.17679	0.11386	2.10383	0.11353	3.46703
0.11403	-0.3737	0.11405	5.24888	0.11406	3.62593	0.1154	2.61255	0.11404	-2.17961	0.11403	2.10442	0.1137	3.45554
0.1142	-0.37703	0.11422	5.24627	0.11422	3.60655	0.11557	2.57657	0.11421	-2.18256	0.1142	2.10609	0.11387	3.44265
0.11437	-0.37975	0.11439	5.24344	0.11439	3.59005	0.11573	2.54068	0.11438	-2.18547	0.11436	2.10763	0.11403	3.4296
0.11453	-0.38262	0.11455	5.24144	0.11456	3.57608	0.1159	2.50654	0.11454	-2.18827	0.11453	2.10781	0.1142	3.41939
0.1147	-0.38561	0.11472	5.24065	0.11472	3.56199	0.11607	2.47253	0.11471	-2.19075	0.1147	2.107	0.11436	3.40986
0.11487	-0.38865	0.11489	5.24027	0.11489	3.54665	0.11623	2.43595	0.11488	-2.19296	0.11486	2.10592	0.11453	3.39907
0.11503	-0.39166	0.11505	5.23926	0.11506	3.53076	0.1164	2.39537	0.11504	-2.19504	0.11503	2.10467	0.1147	3.38741
0.1152	-0.39459	0.11522	5.23792	0.11522	3.51538	0.11656	2.36164	0.11521	-2.19751	0.1152	2.1027	0.11486	3.37576
0.11536	-0.39643	0.11539	5.23628	0.11539	3.49988	0.11673	2.3292	0.11537	-2.20016	0.11536	2.09972	0.11503	3.36454
0.11553	-0.39729	0.11555	5.23454	0.11555	3.48324	0.1169	2.29565	0.11554	-2.20299	0.11553	2.09681	0.1152	3.35284
0.1157	-0.3972	0.11572	5.23241	0.11572	3.46736	0.11706	2.26366	0.11571	-2.20572	0.11569	2.09438	0.11536	3.3383
0.11586	-0.39627	0.11589	5.22907	0.11589	3.45356	0.11723	2.23253	0.11587	-2.20895	0.11586	2.09206	0.11553	3.32324
0.11603	-0.39574	0.11605	5.22559	0.11605	3.4432	0.1174	2.2068	0.11604	-2.21316	0.11603	2.09099	0.1157	3.31277
0.1162	-0.39672	0.11622	5.22266	0.11622	3.4328	0.11756	2.18225	0.11621	-2.21637	0.11619	2.09081	0.11586	3.30372
0.11636	-0.39857	0.11638	5.21982	0.11639	3.4194	0.11773	2.15348	0.11637	-2.21834	0.11636	2.09181	0.11603	3.2948
0.11653	-0.40027	0.11655	5.21744	0.11655	3.40437	0.1179	2.1158	0.11654	-2.21997	0.11653	2.09363	0.1162	3.28586
0.1167	-0.4019	0.11672	5.21539	0.11672	3.38936	0.11806	2.07903	0.11671	-2.222	0.11669	2.09501	0.11636	3.27748
0.11686	-0.4031	0.11688	5.21307	0.11689	3.37553	0.11823	2.04443	0.11687	-2.22432	0.11686	2.09554	0.11653	3.26888
0.11703	-0.40376	0.11705	5.21049	0.11705	3.35978	0.1184	2.0102	0.11704	-2.22729	0.11703	2.0954	0.11669	3.26041
0.1172	-0.40452	0.11722	5.20774	0.11722	3.34163	0.11856	1.98838	0.11721	-2.23058	0.11719	2.0947	0.11686	3.24876
0.11736	-0.40559	0.11738	5.20471	0.11739	3.32446	0.11873	1.97348	0.11737	-2.23398	0.11736	2.09371	0.11703	3.23456
0.11753	-0.40688	0.11755	5.20171	0.11755	3.31021	0.1189	1.95969	0.11754	-2.23764	0.11753	2.09114	0.11719	3.22107
0.11769	-0.4096	0.11772	5.19876	0.11772	3.29579	0.11906	1.94614	0.1177	-2.24117	0.11769	2.08708	0.11736	3.20807
0.11786	-0.41307	0.11788	5.19582	0.11789	3.2805	0.11923	1.93166	0.11787	-2.24427	0.11786	2.08136	0.11753	3.19646
0.11803	-0.41591	0.11805	5.19222	0.11805	3.26554	0.1194	1.89976	0.11804	-2.24725	0.11802	2.07408	0.11769	3.18893
0.11819	-0.41826	0.11822	5.1874	0.11822	3.25242	0.11956	1.87041	0.1182	-2.25055	0.11819	2.06717	0.11786	3.18262
0.11836	-0.4206	0.11838	5.18252	0.11839	3.24076	0.11973	1.85036	0.11837	-2.25447	0.11836	2.06206	0.11803	3.17702
0.11853	-0.42276	0.11855	5.17771	0.11855	3.22903	0.11989	1.83063	0.11854	-2.25861	0.11852	2.05816	0.11819	3.17196
0.11869	-0.42477	0.11871	5.17275	0.11872	3.2167	0.12006	1.81572	0.1187	-2.26267	0.11869	2.05572	0.11836	3.16443
0.11886	-0.42668	0.11888	5.16807	0.11888	3.20345	0.12023	1.8065	0.11887	-2.26684	0.11886	2.05402	0.11853	3.15456
0.11903	-0.42846	0.11905	5.16304	0.11905	3.19211	0.12039	1.80019	0.11904	-2.26925	0.11902	2.05263	0.11869	3.14582
0.11919	-0.43061	0.11921	5.15873	0.11922	3.18074	0.12056	1.79777	0.1192	-2.27097	0.11919	2.05161	0.11886	3.13821
0.11936	-0.43302	0.11938	5.15495	0.11938	3.16849	0.12073	1.79518	0.11937	-2.2723	0.11936	2.05148	0.11902	3.13078
0.11953	-0.43664	0.11955	5.15089	0.11955	3.15552	0.12089	1.78842	0.11954	-2.27347	0.11952	2.05231	0.11919	3.12075
0.11969	-0.44124	0.11971	5.14628	0.11972	3.14275	0.12106	1.78067	0.1197	-2.27525	0.11969	2.05346	0.11936	3.11004
0.11986	-0.44613	0.11988	5.14186	0.11988	3.13016	0.12123	1.77287	0.11987	-2.27831	0.11986	2.05659	0.11952	3.10198
0.12002	-0.45205	0.12005	5.13873	0.12005	3.11736	0.12139	1.76458	0.12004	-2.28122	0.12002	2.06084	0.11969	3.0944
0.12019	-0.45804	0.12021	5.13588	0.12022	3.10403	0.12156	1.75378	0.1202	-2.28328	0.12019	2.06363	0.11986	3.08673
0.12036	-0.46239	0.12038	5.13373	0.12038	3.09141	0.12173	1.73587	0.12037	-2.28525	0.12035	2.06579	0.12002	3.07868
0.12052	-0.46598	0.12055	5.13223	0.12055	3.08061	0.12189	1.72201	0.12053	-2.28741	0.12052	2.06729	0.12019	3.07039
0.12069	-0.46924	0.12071	5.13042	0.12072	3.07133	0.12206	1.71877	0.1207	-2.2897	0.12069	2.06766	0.12036	3.06181
0.12086	-0.47226	0.12088	5.12823	0.12088	3.06215	0.12223	1.71586	0.12087	-2.29162	0.12085	2.06804	0.12052	3.05343
0.12102	-0.47575	0.12104	5.12611	0.12105	3.05254	0.12239	1.71602	0.12103	-2.29336	0.12102	2.06939	0.12069	3.04419
0.12119	-0.47968	0.12121	5.12207	0.12122	3.04398	0.12256	1.7172	0.1212	-2.29504	0.12119	2.07103	0.12086	3.03475
0.12136	-0.48369	0.12138	5.11759	0.12138	3.03791	0.12273	1.70763	0.12137	-2.29701	0.12135	2.07402	0.12102	3.02887
0.12152	-0.48737	0.12154	5.11345	0.12155	3.03162	0.12289	1.69044	0.12153	-2.29899	0.12152	2.07812	0.12119	3.02471
0.12169	-0.49061	0.12171	5.10949	0.12172	3.02403	0.12306	1.67289	0.1217	-2.30062	0.12169	2.08427	0.12135	3.02063
0.12186	-0.49264	0.12188	5.10562	0.12188	3.0145	0.12322	1.65746	0.12187	-2.30213	0.12185	2.09154	0.12152	3.01496
0.12202	-0.49367	0.12204	5.10185	0.12205	3.00553	0.12339	1.64454	0.12203	-2.30276	0.12202	2.09941	0.12169	3.00737
0.12219	-0.49474	0.12221	5.09861	0.12221	2.99726	0.12356	1.64691	0.1222	-2.30238	0.12219	2.10758	0.12185	2.99591
0.12235	-0.49591	0.12238	5.09679	0.12238	2.98886	0.12372	1.64959	0.12237	-2.30139	0.12235	2.11573	0.12202	2.98325
0.12252	-0.4972	0.12254	5.09523	0.12255	2.97877	0.12389	1.65546	0.12253	-2.29986	0.12252	2.12176	0.12219	2.96942
0.12269	-0.49862	0.12271	5.09291	0.12271	2.96899	0.12406	1.66605	0.1227	-2.29826	0.12268	2.12697	0.12235	2.95368
0.12285	-0.50014	0.12288	5.09031	0.12288	2.95966	0.12422	1.6725	0.12287	-2.29778	0.12285	2.13284	0.12252	2.93972
0.12302	-0.50172	0.12304	5.08779	0.12305	2.9505	0.12439	1.6734	0.12303	-2.29758	0.12302	2.1394	0.12269	2.92783
0.12319	-0.50339	0.12321	5.08529	0.12321	2.94049	0.12456	1.67406	0.1232	-2.29929	0.12318	2.14581	0.12285	2.91652
0.12335	-0.50515	0.12338	5.0825	0.12338	2.92835	0.12472	1.67333	0.12336	-2.30151	0.12335	2.15203	0.12302	2.90528
0.12352	-0.50672	0.12354	5.0781	0.12355	2.91694	0.12489	1.67269	0.12353	-2.30372	0.12352	2.15806	0.12319	2.89439
0.12369	-0.50799	0.12371	5.07354	0.12371	2.90656	0.12506	1.67565	0.1237	-2.30545	0.12368	2.16263	0.12335	2.8864
0.12385	-0.50933	0.12387	5.06972	0.12388	2.89657	0.12522	1.67955	0.12386	-2.30659	0.12385	2.16666	0.12352	2.87873
0.12402	-0.51104	0.12404	5.066	0.12405	2.88743	0.12539	1.68235	0.12403	-2.30639	0.12402	2.16861	0.12368	2.87027
0.12419	-0.51304	0.12421	5.0631	0.12421	2.87906	0.12556	1.68213	0.1242	-2.30603	0.12418	2.16966	0.12385	2.85992
0.12435	-0.51424	0.12437	5.06111	0.12438	2.87158	0.12572	1.68501	0.12436	-2.30608	0.12435	2.1703	0.12402	2.8499
0.12452	-0.51455	0.12454	5.05832	0.12455	2.86407	0.12589	1.69429	0.12453	-2.30636	0.12452	2.17024	0.12418	2.83998
0.12469	-0.51468	0.12471	5.05501	0.12471	2.85609	0.12605	1.70363	0.1247	-2.3064	0.12468	2.17059	0.12435	2.83034
0.12485	-0.51434	0.12487	5.05156	0.12488	2.84622	0.12622	1.71163	0.12486	-2.30631	0.12485	2.17213	0.12452	2.82124
0.12502	-0.51391	0.12504	5.04667	0.12505	2.83641	0.12639	1.71827	0.12503	-2.30622	0.12501	2.17395	0.12468	2.81302
0.12518	-0.51383	0.12521	5.04154	0.12521	2.82669	0.12655	1.72197	0.1252	-2.30438	0.12518	2.1765	0.12485	2.80575
0.12535	-0.51387	0.12537	5.03861	0.12538	2.81705	0.12672	1.72393	0.12536	-2.30224	0.12535	2.17932	0.12502	2.79838
0.12552	-0.51355	0.12554	5.03599	0.12554	2.80724	0.12689	1.7254	0.12553	-2.29976	0.12551	2.18063	0.12518	2.79119
0.12568	-0.51253	0.12571	5.03292	0.12571	2.79843	0.12705	1.72459	0.12569	-2.29734	0.12568	2.18101	0.12535	2.78454
0.12585	-0.51171	0.12587	5.02975	0.12588	2.79129	0.12722	1.72327	0.12586	-2.29492	0.12585	2.18115	0.12552	2.77831
0.12602	-0.51122	0.12604	5.02639	0.12604	2.78571	0.12739	1.72065	0.12603	-2.29227	0.12601	2.18086	0.12568	2.77397
0.12618	-0.51082	0.1262	5.02287	0.12621	2.77955	0.12755	1.71901	0.12619	-2.29057	0.12618	2.18031	0.12585	2.76973
0.12635	-0.51073	0.12637	5.01942	0.12638	2.77128	0.12772	1.72378	0.12636	-2.28992	0.12635	2.17923	0.12601	2.76624
0.12652	-0.51084	0.12654	5.01591	0.12654	2.76297	0.12789	1.73748	0.12653	-2.28929	0.12651	2.17797	0.12618	2.76394
0.12668	-0.51076	0.1267	5.01227	0.12671	2.75577	0.12805	1.74788	0.12669	-2.28858	0.12668	2.17504	0.12635	2.76369
0.12685	-0.51054	0.12687	5.00942	0.12688	2.74867	0.12822	1.75337	0.12686	-2.2878	0.12685	2.17042	0.12651	2.7655
0.12702	-0.51015	0.12704	5.00682	0.12704	2.74081	0.12839	1.75834	0.12703	-2.28579	0.12701	2.16504	0.12668	2.7674
0.12718	-0.50941	0.1272	5.00406	0.12721	2.73224	0.12855	1.76197	0.12719	-2.28364	0.12718	2.15875	0.12685	2.76752
0.12735	-0.50856	0.12737	5.0007	0.12738	2.72513	0.12872	1.76532	0.12736	-2.28185	0.12734	2.15259	0.12701	2.76711
0.12751	-0.5076	0.12754	4.99767	0.12754	2.71961	0.12889	1.7701	0.12753	-2.28188	0.12751	2.14804	0.12718	2.76622
0.12768	-0.50672	0.1277	4.99621	0.12771	2.71397	0.12905	1.77545	0.12769	-2.28207	0.12768	2.14413	0.12735	2.76525
0.12785	-0.50642	0.12787	4.99495	0.12788	2.70794	0.12922	1.78432	0.12786	-2.28261	0.12784	2.14166	0.12751	2.76426
0.12801	-0.50671	0.12804	4.99334	0.12804	2.70135	0.12938	1.8028	0.12803	-2.28314	0.12801	2.13968	0.12768	2.76309
0.12818	-0.5066	0.1282	4.99159	0.12821	2.69417	0.12955	1.82171	0.12819	-2.28434	0.12818	2.13772	0.12785	2.76275
0.12835	-0.50605	0.12837	4.98882	0.12838	2.68642	0.12972	1.84498	0.12836	-2.286	0.12834	2.13588	0.12801	2.7643
0.12851	-0.50557	0.12853	4.98519	0.12854	2.67803	0.12988	1.86809	0.12852	-2.28721	0.12851	2.13444	0.12818	2.76592
0.12868	-0.50524	0.1287	4.9817	0.12871	2.66897	0.13005	1.88998	0.12869	-2.28818	0.12868	2.13377	0.12834	2.76839
0.12885	-0.5052	0.12887	4.97778	0.12887	2.66082	0.13022	1.91086	0.12886	-2.28917	0.12884	2.13323	0.12851	2.77167
0.12901	-0.50562	0.12903	4.97392	0.12904	2.65421	0.13038	1.93352	0.12902	-2.2878	0.12901	2.13189	0.12868	2.77397
0.12918	-0.50625	0.1292	4.97146	0.12921	2.64782	0.13055	1.95556	0.12919	-2.28634	0.12918	2.13017	0.12884	2.77566
0.12935	-0.50668	0.12937	4.96914	0.12937	2.64088	0.13072	1.97754	0.12936	-2.28685	0.12934	2.12758	0.12901	2.77735
0.12951	-0.50684	0.12953	4.96681	0.12954	2.63324	0.13088	1.99464	0.12952	-2.28741	0.12951	2.12485	0.12918	2.77608
0.12968	-0.50745	0.1297	4.96455	0.12971	2.62573	0.13105	2.01057	0.12969	-2.28868	0.12968	2.12174	0.12934	2.77447
0.12984	-0.50866	0.12987	4.96243	0.12987	2.61786	0.13122	2.02864	0.12986	-2.29118	0.12984	2.11756	0.12951	2.77226
0.13001	-0.50966	0.13003	4.96073	0.13004	2.60972	0.13138	2.04638	0.13002	-2.2937	0.13001	2.11324	0.12968	2.77007
0.13018	-0.51004	0.1302	4.95897	0.13021	2.60076	0.13155	2.06418	0.13019	-2.29646	0.13017	2.10938	0.12984	2.76907
0.13034	-0.5099	0.13037	4.95637	0.13037	2.59197	0.13172	2.07854	0.13036	-2.29915	0.13034	2.10574	0.13001	2.77072
0.13051	-0.50945	0.13053	4.95338	0.13054	2.58484	0.13188	2.08645	0.13052	-2.30224	0.13051	2.10209	0.13018	2.77154
0.13068	-0.50877	0.1307	4.95041	0.13071	2.57823	0.13205	2.08553	0.13069	-2.30538	0.13067	2.09829	0.13034	2.77116
0.13084	-0.50798	0.13086	4.94751	0.13087	2.57165	0.13222	2.08427	0.13086	-2.30854	0.13084	2.09623	0.13051	2.77083
0.13101	-0.50705	0.13103	4.94432	0.13104	2.56532	0.13238	2.08146	0.13102	-2.31185	0.13101	2.09574	0.13067	2.77184
0.13118	-0.50628	0.1312	4.93883	0.13121	2.55984	0.13255	2.07768	0.13119	-2.31487	0.13117	2.09549	0.13084	2.77358
0.13134	-0.50583	0.13136	4.93362	0.13137	2.55518	0.13271	2.0752	0.13135	-2.31566	0.13134	2.09503	0.13101	2.77702
0.13151	-0.50543	0.13153	4.92916	0.13154	2.5505	0.13288	2.07315	0.13152	-2.31596	0.13151	2.09452	0.13117	2.78093
0.13168	-0.50491	0.1317	4.92455	0.1317	2.54519	0.13305	2.07071	0.13169	-2.31462	0.13167	2.09188	0.13134	2.78485
0.13184	-0.50416	0.13186	4.92044	0.13187	2.53953	0.13321	2.06701	0.13185	-2.31323	0.13184	2.08899	0.13151	2.78914
0.13201	-0.50279	0.13203	4.91681	0.13204	2.53417	0.13338	2.05872	0.13202	-2.31198	0.13201	2.08572	0.13167	2.79354
0.13218	-0.50081	0.1322	4.91336	0.1322	2.52896	0.13355	2.04168	0.13219	-2.3109	0.13217	2.08234	0.13184	2.79817
0.13234	-0.49931	0.13236	4.91015	0.13237	2.52395	0.13371	2.02424	0.13235	-2.30915	0.13234	2.07877	0.13201	2.80254
0.13251	-0.49866	0.13253	4.9071	0.13254	2.51913	0.13388	2.00367	0.13252	-2.30703	0.1325	2.07534	0.13217	2.80512
0.13267	-0.49827	0.1327	4.90322	0.1327	2.51511	0.13405	1.97772	0.13269	-2.30495	0.13267	2.07171	0.13234	2.80588
0.13284	-0.49775	0.13286	4.89922	0.13287	2.51184	0.13421	1.95369	0.13285	-2.30357	0.13284	2.06984	0.13251	2.80584
0.13301	-0.49715	0.13303	4.89549	0.13304	2.50858	0.13438	1.93081	0.13302	-2.30236	0.133	2.06875	0.13267	2.80503
0.13317	-0.4951	0.1332	4.8918	0.1332	2.5043	0.13455	1.90799	0.13319	-2.30342	0.13317	2.06865	0.13284	2.80427
0.13334	-0.49156	0.13336	4.88807	0.13337	2.49907	0.13471	1.88707	0.13335	-2.30446	0.13334	2.0689	0.133	2.80403
0.13351	-0.48824	0.13353	4.88353	0.13354	2.49427	0.13488	1.86935	0.13352	-2.30487	0.1335	2.06866	0.13317	2.80385
0.13367	-0.48514	0.13369	4.87899	0.1337	2.48978	0.13505	1.85614	0.13368	-2.30411	0.13367	2.06628	0.13334	2.80636
0.13384	-0.4825	0.13386	4.87454	0.13387	2.48533	0.13521	1.84398	0.13385	-2.30256	0.13384	2.06384	0.1335	2.80917
0.13401	-0.48108	0.13403	4.87011	0.13404	2.48106	0.13538	1.8304	0.13402	-2.29993	0.134	2.06251	0.13367	2.81247
0.13417	-0.48062	0.13419	4.8663	0.1342	2.47738	0.13555	1.81352	0.13418	-2.29725	0.13417	2.06135	0.13384	2.81681
0.13434	-0.48077	0.13436	4.86302	0.13437	2.47456	0.13571	1.79709	0.13435	-2.29504	0.13434	2.06036	0.134	2.82086
0.13451	-0.48129	0.13453	4.86049	0.13454	2.47215	0.13588	1.78198	0.13452	-2.29295	0.1345	2.05955	0.13417	2.82355
0.13467	-0.48146	0.13469	4.85838	0.1347	2.46878	0.13604	1.7672	0.13468	-2.29063	0.13467	2.05882	0.13434	2.82484
0.13484	-0.48122	0.13486	4.85641	0.13487	2.46442	0.13621	1.75203	0.13485	-2.28815	0.13483	2.05809	0.1345	2.82612
0.135	-0.48102	0.13503	4.85437	0.13503	2.45986	0.13638	1.73744	0.13502	-2.28544	0.135	2.05735	0.13467	2.82717
0.13517	-0.48096	0.13519	4.8523	0.1352	2.45515	0.13654	1.72433	0.13518	-2.2818	0.13517	2.05659	0.13484	2.82814
0.13534	-0.48109	0.13536	4.85071	0.13537	2.45044	0.13671	1.71228	0.13535	-2.27853	0.13533	2.05582	0.135	2.828
0.1355	-0.48205	0.13553	4.85075	0.13553	2.44612	0.13688	1.69938	0.13552	-2.27729	0.1355	2.05524	0.13517	2.82724
0.13567	-0.48366	0.13569	4.85079	0.1357	2.44221	0.13704	1.68561	0.13568	-2.27613	0.13567	2.05474	0.13533	2.82643
0.13584	-0.48541	0.13586	4.85092	0.13587	2.43878	0.13721	1.67217	0.13585	-2.2756	0.13583	2.05468	0.1355	2.82618
0.136	-0.48725	0.13602	4.85138	0.13603	2.43577	0.13738	1.65946	0.13602	-2.27562	0.136	2.05573	0.13567	2.82609
0.13617	-0.48875	0.13619	4.85158	0.1362	2.4327	0.13754	1.64673	0.13618	-2.27546	0.13617	2.05711	0.13583	2.82574
0.13634	-0.48977	0.13636	4.85139	0.13637	2.42954	0.13771	1.63232	0.13635	-2.27514	0.13633	2.05876	0.136	2.82531
0.1365	-0.49008	0.13652	4.85107	0.13653	2.42628	0.13788	1.61631	0.13651	-2.2747	0.1365	2.06042	0.13617	2.82464
0.13667	-0.48957	0.13669	4.8507	0.1367	2.42274	0.13804	1.6042	0.13668	-2.27347	0.13667	2.06	0.13633	2.82364
0.13684	-0.48877	0.13686	4.85028	0.13687	2.41915	0.13821	1.59613	0.13685	-2.27207	0.13683	2.05851	0.1365	2.82392
0.137	-0.4866	0.13702	4.85031	0.13703	2.41526	0.13838	1.5879	0.13701	-2.27004	0.137	2.05498	0.13667	2.82608
0.13717	-0.48331	0.13719	4.85064	0.1372	2.41084	0.13854	1.57953	0.13718	-2.268	0.13716	2.05089	0.13683	2.82869
0.13733	-0.48162	0.13736	4.85101	0.13737	2.4075	0.13871	1.5702	0.13735	-2.26592	0.13733	2.04687	0.137	2.83172
0.1375	-0.48129	0.13752	4.84998	0.13753	2.40505	0.13888	1.55937	0.13751	-2.26398	0.1375	2.04382	0.13717	2.83498
0.13767	-0.48205	0.13769	4.84847	0.1377	2.40254	0.13904	1.54736	0.13768	-2.26265	0.13766	2.04136	0.13733	2.83786
0.13783	-0.48535	0.13786	4.84755	0.13787	2.39954	0.13921	1.53466	0.13785	-2.26238	0.13783	2.0412	0.1375	2.84059
0.138	-0.48939	0.13802	4.84684	0.13803	2.39616	0.13937	1.52186	0.13801	-2.26205	0.138	2.04112	0.13766	2.84328
0.13817	-0.49218	0.13819	4.84671	0.1382	2.39264	0.13954	1.51137	0.13818	-2.26146	0.13816	2.03985	0.13783	2.84616
0.13833	-0.49436	0.13835	4.84815	0.13836	2.38912	0.13971	1.50364	0.13835	-2.26064	0.13833	2.0372	0.138	2.8486
0.1385	-0.49603	0.13852	4.84974	0.13853	2.38543	0.13987	1.49641	0.13851	-2.25942	0.1385	2.03436	0.13816	2.84967
0.13867	-0.49712	0.13869	4.85076	0.1387	2.38141	0.14004	1.4909	0.13868	-2.25808	0.13866	2.03141	0.13833	2.8504
0.13883	-0.49845	0.13885	4.85164	0.13886	2.37828	0.14021	1.48677	0.13884	-2.25678	0.13883	2.02835	0.1385	2.85098
0.139	-0.50012	0.13902	4.85164	0.13903	2.37608	0.14037	1.48282	0.13901	-2.25582	0.139	2.02506	0.13866	2.8514
0.13917	-0.50184	0.13919	4.85049	0.1392	2.37408	0.14054	1.47897	0.13918	-2.25506	0.13916	2.02186	0.13883	2.85202
0.13933	-0.50323	0.13935	4.8492	0.13936	2.37074	0.14071	1.47475	0.13934	-2.25528	0.13933	2.01847	0.139	2.85281
0.1395	-0.50422	0.13952	4.84798	0.13953	2.36632	0.14087	1.47002	0.13951	-2.25549	0.13949	2.01544	0.13916	2.85362
0.13967	-0.50431	0.13969	4.84676	0.1397	2.36151	0.14104	1.46603	0.13968	-2.25575	0.13966	2.0119	0.13933	2.85474
0.13983	-0.50387	0.13985	4.84654	0.13986	2.35664	0.14121	1.4631	0.13984	-2.25607	0.13983	2.00786	0.1395	2.85587
0.14	-0.50359	0.14002	4.84664	0.14003	2.35157	0.14137	1.46001	0.14001	-2.25607	0.13999	2.00295	0.13966	2.85637
0.14016	-0.50356	0.14019	4.84644	0.1402	2.34593	0.14154	1.45507	0.14018	-2.25561	0.14016	1.99744	0.13983	2.85672
0.14033	-0.50399	0.14035	4.84614	0.14036	2.34007	0.14171	1.44885	0.14034	-2.25483	0.14033	1.99173	0.13999	2.85708
0.1405	-0.50489	0.14052	4.8452	0.14053	2.33417	0.14187	1.4447	0.14051	-2.2542	0.14049	1.98647	0.14016	2.85746
0.14066	-0.50596	0.14068	4.84259	0.1407	2.32845	0.14204	1.44228	0.14068	-2.25443	0.14066	1.98187	0.14033	2.8581
0.14083	-0.50696	0.14085	4.83965	0.14086	2.32315	0.14221	1.44243	0.14084	-2.25492	0.14083	1.97946	0.14049	2.85908
0.141	-0.50793	0.14102	4.83674	0.14103	2.31858	0.14237	1.447	0.14101	-2.25622	0.14099	1.97798	0.14066	2.86012
0.14116	-0.51046	0.14118	4.83387	0.1412	2.3147	0.14254	1.45364	0.14118	-2.25763	0.14116	1.97653	0.14083	2.8606
0.14133	-0.51389	0.14135	4.83189	0.14136	2.31121	0.1427	1.46041	0.14134	-2.2589	0.14133	1.97602	0.14099	2.86083
0.1415	-0.51745	0.14152	4.83054	0.14153	2.30785	0.14287	1.46705	0.14151	-2.25942	0.14149	1.9754	0.14116	2.86057
0.14166	-0.52147	0.14168	4.83085	0.14169	2.30558	0.14304	1.47594	0.14167	-2.25979	0.14166	1.9738	0.14133	2.8601
0.14183	-0.52438	0.14185	4.83154	0.14186	2.30402	0.1432	1.48734	0.14184	-2.26015	0.14182	1.97212	0.14149	2.85967
0.142	-0.5247	0.14202	4.83206	0.14203	2.30305	0.14337	1.4991	0.14201	-2.2605	0.14199	1.96952	0.14166	2.85981
0.14216	-0.52396	0.14218	4.83105	0.14219	2.30232	0.14354	1.51108	0.14217	-2.26138	0.14216	1.96509	0.14183	2.86001
0.14233	-0.52266	0.14235	4.82907	0.14236	2.30094	0.1437	1.52265	0.14234	-2.26271	0.14232	1.96204	0.14199	2.86002
0.14249	-0.52078	0.14252	4.82544	0.14253	2.29766	0.14387	1.53291	0.14251	-2.26433	0.14249	1.96014	0.14216	2.86001
0.14266	-0.51936	0.14268	4.82147	0.14269	2.29381	0.14404	1.54147	0.14267	-2.26614	0.14266	1.95825	0.14232	2.85982
0.14283	-0.51853	0.14285	4.81761	0.14286	2.29037	0.1442	1.54824	0.14284	-2.268	0.14282	1.9565	0.14249	2.85937
0.14299	-0.51784	0.14302	4.81389	0.14303	2.28693	0.14437	1.55408	0.14301	-2.26841	0.14299	1.95483	0.14266	2.85904
0.14316	-0.51736	0.14318	4.81118	0.14319	2.28259	0.14454	1.55978	0.14317	-2.2686	0.14316	1.95326	0.14282	2.85886
0.14333	-0.51702	0.14335	4.80959	0.14336	2.2773	0.1447	1.56529	0.14334	-2.26847	0.14332	1.95175	0.14299	2.8587
0.14349	-0.51705	0.14351	4.80817	0.14353	2.2734	0.14487	1.57112	0.14351	-2.2683	0.14349	1.95007	0.14316	2.85792
0.14366	-0.51726	0.14368	4.80661	0.14369	2.27028	0.14504	1.57724	0.14367	-2.26852	0.14366	1.94769	0.14332	2.85686
0.14383	-0.5171	0.14385	4.80498	0.14386	2.26726	0.1452	1.58355	0.14384	-2.26938	0.14382	1.94553	0.14349	2.85547
0.14399	-0.51638	0.14401	4.80228	0.14403	2.26477	0.14537	1.5916	0.14401	-2.27026	0.14399	1.94395	0.14366	2.85403
0.14416	-0.51529	0.14418	4.79925	0.14419	2.26269	0.14553	1.60222	0.14417	-2.27104	0.14416	1.94238	0.14382	2.85266
0.14433	-0.51396	0.14435	4.79575	0.14436	2.26127	0.1457	1.6138	0.14434	-2.27182	0.14432	1.9404	0.14399	2.85177
0.14449	-0.51254	0.14451	4.79105	0.14453	2.25999	0.14587	1.62732	0.1445	-2.27173	0.14449	1.93776	0.14416	2.85089
0.14466	-0.51064	0.14468	4.78689	0.14469	2.259	0.14603	1.6405	0.14467	-2.27134	0.14465	1.93444	0.14432	2.85
0.14482	-0.50845	0.14485	4.78445	0.14486	2.25834	0.1462	1.65384	0.14484	-2.2699	0.14482	1.93083	0.14449	2.84912
0.14499	-0.50632	0.14501	4.78229	0.14502	2.25725	0.14637	1.66751	0.145	-2.2681	0.14499	1.92747	0.14465	2.84939
0.14516	-0.5042	0.14518	4.7811	0.14519	2.25543	0.14653	1.67838	0.14517	-2.26607	0.14515	1.92573	0.14482	2.85055
0.14532	-0.50234	0.14535	4.78045	0.14536	2.25351	0.1467	1.68576	0.14534	-2.26338	0.14532	1.92413	0.14499	2.85241
0.14549	-0.50126	0.14551	4.77887	0.14552	2.24996	0.14687	1.69159	0.1455	-2.26084	0.14549	1.92154	0.14515	2.85447
0.14566	-0.50032	0.14568	4.77669	0.14569	2.24566	0.14703	1.6965	0.14567	-2.25916	0.14565	1.91889	0.14532	2.85657
0.14582	-0.49897	0.14584	4.77416	0.14586	2.2403	0.1472	1.69882	0.14584	-2.25752	0.14582	1.9157	0.14549	2.85952
0.14599	-0.49745	0.14601	4.76895	0.14602	2.23447	0.14737	1.69986	0.146	-2.25623	0.14599	1.91157	0.14565	2.86247
0.14616	-0.49488	0.14618	4.76366	0.14619	2.22897	0.14753	1.69743	0.14617	-2.25516	0.14615	1.90862	0.14582	2.86479
0.14632	-0.49141	0.14634	4.75994	0.14636	2.22377	0.1477	1.69454	0.14634	-2.25354	0.14632	1.90714	0.14599	2.8671
0.14649	-0.4884	0.14651	4.75643	0.14652	2.21909	0.14787	1.68902	0.1465	-2.25146	0.14649	1.90582	0.14615	2.87097
0.14666	-0.48591	0.14668	4.75228	0.14669	2.2157	0.14803	1.6802	0.14667	-2.2494	0.14665	1.90552	0.14632	2.87732
0.14682	-0.48353	0.14684	4.74729	0.14686	2.21373	0.1482	1.6723	0.14683	-2.24591	0.14682	1.90582	0.14649	2.88419
0.14699	-0.48403	0.14701	4.74212	0.14702	2.21183	0.14837	1.66586	0.147	-2.24233	0.14698	1.90603	0.14665	2.89132
0.14716	-0.4856	0.14718	4.73685	0.14719	2.21074	0.14853	1.65869	0.14717	-2.24028	0.14715	1.90623	0.14682	2.89842
0.14732	-0.48692	0.14734	4.73161	0.14736	2.20998	0.1487	1.64911	0.14733	-2.23835	0.14732	1.9062	0.14698	2.90708
0.14749	-0.48816	0.14751	4.72728	0.14752	2.21024	0.14886	1.63873	0.1475	-2.23756	0.14748	1.90456	0.14715	2.91617
0.14765	-0.48879	0.14768	4.72319	0.14769	2.21115	0.14903	1.62849	0.14767	-2.2385	0.14765	1.90297	0.14732	2.92617
0.14782	-0.48828	0.14784	4.71931	0.14785	2.21227	0.1492	1.61849	0.14783	-2.23908	0.14782	1.9021	0.14748	2.93635
0.14799	-0.48788	0.14801	4.71549	0.14802	2.21347	0.14936	1.60946	0.148	-2.239	0.14798	1.90126	0.14765	2.9462
0.14815	-0.48803	0.14817	4.71201	0.14819	2.21471	0.14953	1.60279	0.14817	-2.2389	0.14815	1.90063	0.14782	2.95488
0.14832	-0.48832	0.14834	4.70922	0.14835	2.21562	0.1497	1.59462	0.14833	-2.23655	0.14832	1.9004	0.14798	2.96333
0.14849	-0.48898	0.14851	4.70701	0.14852	2.21612	0.14986	1.58312	0.1485	-2.23364	0.14848	1.90065	0.14815	2.97152
0.14865	-0.48987	0.14867	4.70604	0.14869	2.21642	0.15003	1.57142	0.14867	-2.23157	0.14865	1.90129	0.14832	2.97966
0.14882	-0.49132	0.14884	4.70517	0.14885	2.21595	0.1502	1.55928	0.14883	-2.22984	0.14882	1.90205	0.14848	2.98759
0.14899	-0.49298	0.14901	4.70481	0.14902	2.2147	0.15036	1.5469	0.149	-2.22855	0.14898	1.90345	0.14865	2.99538
0.14915	-0.49478	0.14917	4.70473	0.14919	2.2131	0.15053	1.53462	0.14917	-2.22934	0.14915	1.90476	0.14882	3.00188
0.14932	-0.49733	0.14934	4.70363	0.14935	2.21131	0.1507	1.52248	0.14933	-2.23032	0.14931	1.9045	0.14898	3.0075
0.14949	-0.49985	0.14951	4.70201	0.14952	2.20995	0.15086	1.51287	0.1495	-2.23203	0.14948	1.90404	0.14915	3.01325
0.14965	-0.50153	0.14967	4.70022	0.14969	2.20933	0.15103	1.50991	0.14966	-2.23373	0.14965	1.90318	0.14931	3.01526
0.14982	-0.50303	0.14984	4.69701	0.14985	2.20989	0.1512	1.5088	0.14983	-2.23499	0.14981	1.90114	0.14948	3.0171
0.14998	-0.50379	0.15001	4.69414	0.15002	2.21174	0.15136	1.5106	0.15	-2.23599	0.14998	1.89977	0.14965	3.01808
0.15015	-0.50357	0.15017	4.69409	0.15019	2.2137	0.15153	1.51301	0.15016	-2.23665	0.15015	1.89939	0.14981	3.01905
0.15032	-0.50435	0.15034	4.69417	0.15035	2.21416	0.1517	1.51699	0.15033	-2.23707	0.15031	1.89923	0.14998	3.01838
0.15048	-0.50592	0.15051	4.69412	0.15052	2.21278	0.15186	1.5233	0.1505	-2.23748	0.15048	1.90013	0.15015	3.01531
0.15065	-0.50766	0.15067	4.69394	0.15069	2.21113	0.15203	1.53236	0.15066	-2.23787	0.15065	1.90169	0.15031	3.01041
0.15082	-0.51079	0.15084	4.6945	0.15085	2.20925	0.15219	1.54479	0.15083	-2.23828	0.15081	1.90224	0.15048	3.00312
0.15098	-0.5143	0.151	4.69581	0.15102	2.20746	0.15236	1.55808	0.151	-2.24018	0.15098	1.90222	0.15065	2.99561
0.15115	-0.51473	0.15117	4.69712	0.15118	2.20587	0.15253	1.57351	0.15116	-2.24212	0.15115	1.90225	0.15081	2.98788
0.15132	-0.51436	0.15134	4.6996	0.15135	2.20389	0.15269	1.59075	0.15133	-2.24421	0.15131	1.90239	0.15098	2.98011
0.15148	-0.51381	0.1515	4.70224	0.15152	2.2012	0.15286	1.61046	0.1515	-2.24646	0.15148	1.903	0.15115	2.97068
0.15165	-0.51276	0.15167	4.70371	0.15168	2.1983	0.15303	1.63136	0.15166	-2.24752	0.15164	1.90499	0.15131	2.96051
0.15182	-0.51229	0.15184	4.70509	0.15185	2.19511	0.15319	1.65912	0.15183	-2.2469	0.15181	1.90716	0.15148	2.95057
0.15198	-0.51299	0.152	4.706	0.15202	2.19156	0.15336	1.6984	0.15199	-2.24633	0.15198	1.90987	0.15164	2.9395
0.15215	-0.51392	0.15217	4.70581	0.15218	2.18786	0.15353	1.73647	0.15216	-2.24676	0.15214	1.91297	0.15181	2.92839
0.15231	-0.51518	0.15234	4.70526	0.15235	2.18411	0.15369	1.77236	0.15233	-2.24755	0.15231	1.91582	0.15198	2.91849
0.15248	-0.51669	0.1525	4.70392	0.15252	2.18052	0.15386	1.8143	0.15249	-2.25057	0.15248	1.91842	0.15214	2.90895
0.15265	-0.51774	0.15267	4.70253	0.15268	2.17758	0.15403	1.87409	0.15266	-2.25398	0.15264	1.92064	0.15231	2.89865
0.15281	-0.51862	0.15284	4.70054	0.15285	2.17538	0.15419	1.94572	0.15283	-2.25658	0.15281	1.92152	0.15248	2.88793
0.15298	-0.51939	0.153	4.6982	0.15302	2.174	0.15436	2.01839	0.15299	-2.25624	0.15298	1.92175	0.15264	2.87739
0.15315	-0.51963	0.15317	4.69529	0.15318	2.17317	0.15453	2.0914	0.15316	-2.25531	0.15314	1.92138	0.15281	2.86664
0.15331	-0.51971	0.15333	4.69216	0.15335	2.17216	0.15469	2.16555	0.15333	-2.25242	0.15331	1.92079	0.15298	2.85626
0.15348	-0.51887	0.1535	4.68919	0.15352	2.17084	0.15486	2.24331	0.15349	-2.24966	0.15348	1.92032	0.15314	2.84547
0.15365	-0.51794	0.15367	4.68739	0.15368	2.16888	0.15503	2.31913	0.15366	-2.24833	0.15364	1.92015	0.15331	2.83477
0.15381	-0.51679	0.15383	4.68578	0.15385	2.16622	0.15519	2.38911	0.15383	-2.24791	0.15381	1.92051	0.15348	2.82746
0.15398	-0.51533	0.154	4.68556	0.15402	2.16339	0.15536	2.45804	0.15399	-2.24791	0.15397	1.92196	0.15364	2.82043
0.15415	-0.51473	0.15417	4.68531	0.15418	2.1607	0.15552	2.52843	0.15416	-2.24816	0.15414	1.92325	0.15381	2.81396
0.15431	-0.51515	0.15433	4.68466	0.15435	2.15812	0.15569	2.60107	0.15433	-2.24817	0.15431	1.92401	0.15397	2.80919
0.15448	-0.51559	0.1545	4.68362	0.15451	2.15732	0.15586	2.67244	0.15449	-2.24563	0.15447	1.92422	0.15414	2.80618
0.15465	-0.51613	0.15467	4.68268	0.15468	2.15799	0.15602	2.74148	0.15466	-2.2431	0.15464	1.92348	0.15431	2.80543
0.15481	-0.51663	0.15483	4.68188	0.15485	2.1582	0.15619	2.8097	0.15482	-2.2406	0.15481	1.9219	0.15447	2.80464
0.15498	-0.51546	0.155	4.68109	0.15501	2.15738	0.15636	2.87669	0.15499	-2.23816	0.15497	1.92032	0.15464	2.80311
0.15514	-0.51415	0.15517	4.67968	0.15518	2.15593	0.15652	2.94135	0.15516	-2.23697	0.15514	1.91918	0.15481	2.8013
0.15531	-0.51285	0.15533	4.67814	0.15535	2.15429	0.15669	3.00396	0.15532	-2.2373	0.15531	1.91816	0.15497	2.79972
0.15548	-0.51171	0.1555	4.67551	0.15551	2.15251	0.15686	3.0667	0.15549	-2.23746	0.15547	1.91709	0.15514	2.79821
0.15564	-0.51078	0.15566	4.67276	0.15568	2.15089	0.15702	3.13312	0.15566	-2.2374	0.15564	1.91595	0.15531	2.79652
0.15581	-0.51037	0.15583	4.66986	0.15585	2.14942	0.15719	3.20418	0.15582	-2.23721	0.15581	1.91494	0.15547	2.79358
0.15598	-0.50979	0.156	4.66651	0.15601	2.14828	0.15736	3.26735	0.15599	-2.23588	0.15597	1.91451	0.15564	2.79086
0.15614	-0.50807	0.15616	4.66367	0.15618	2.14747	0.15752	3.32005	0.15616	-2.23422	0.15614	1.91516	0.15581	2.78919
0.15631	-0.50583	0.15633	4.66182	0.15635	2.14652	0.15769	3.3732	0.15632	-2.23157	0.1563	1.91558	0.15597	2.78762
0.15648	-0.50316	0.1565	4.66013	0.15651	2.14465	0.15786	3.42867	0.15649	-2.22875	0.15647	1.91536	0.15614	2.78661
0.15664	-0.50044	0.15666	4.65964	0.15668	2.14207	0.15802	3.47826	0.15666	-2.22545	0.15664	1.91513	0.1563	2.78642
0.15681	-0.49807	0.15683	4.65997	0.15685	2.13881	0.15819	3.50968	0.15682	-2.22118	0.1568	1.91428	0.15647	2.78669
0.15698	-0.49714	0.157	4.66091	0.15701	2.1351	0.15836	3.53104	0.15699	-2.21797	0.15697	1.91298	0.15664	2.78737
0.15714	-0.49635	0.15716	4.66215	0.15718	2.13142	0.15852	3.54552	0.15716	-2.21744	0.15714	1.91309	0.1568	2.78806
0.15731	-0.49607	0.15733	4.66341	0.15735	2.1279	0.15869	3.55027	0.15732	-2.21699	0.1573	1.91392	0.15697	2.78905
0.15747	-0.49562	0.1575	4.66538	0.15751	2.1247	0.15885	3.55154	0.15749	-2.21712	0.15747	1.91478	0.15714	2.79016
0.15764	-0.49463	0.15766	4.66708	0.15768	2.12176	0.15902	3.54913	0.15765	-2.21737	0.15764	1.91585	0.1573	2.7917
0.15781	-0.49328	0.15783	4.6677	0.15784	2.11891	0.15919	3.5475	0.15782	-2.21628	0.1578	1.91692	0.15747	2.79327
0.15797	-0.49219	0.15799	4.66821	0.15801	2.11669	0.15935	3.54983	0.15799	-2.21432	0.15797	1.91765	0.15764	2.79476
0.15814	-0.49132	0.15816	4.66731	0.15818	2.1149	0.15952	3.55475	0.15815	-2.2123	0.15814	1.91837	0.1578	2.79612
0.15831	-0.49055	0.15833	4.66468	0.15834	2.11299	0.15969	3.55801	0.15832	-2.20992	0.1583	1.91885	0.15797	2.79668
0.15847	-0.49012	0.15849	4.66247	0.15851	2.111	0.15985	3.55983	0.15849	-2.20804	0.15847	1.91834	0.15814	2.79578
0.15864	-0.4897	0.15866	4.66064	0.15868	2.10917	0.16002	3.56296	0.15865	-2.20847	0.15863	1.91831	0.1583	2.79477
0.15881	-0.4892	0.15883	4.65902	0.15884	2.1079	0.16019	3.56816	0.15882	-2.20868	0.1588	1.91884	0.15847	2.79332
0.15897	-0.4887	0.15899	4.65883	0.15901	2.10742	0.16035	3.57493	0.15899	-2.20756	0.15897	1.91939	0.15863	2.79169
0.15914	-0.4884	0.15916	4.6593	0.15918	2.108	0.16052	3.58333	0.15915	-2.20465	0.15913	1.9204	0.1588	2.79075
0.15931	-0.48837	0.15933	4.66029	0.15934	2.10901	0.16069	3.59214	0.15932	-2.2006	0.1593	1.92174	0.15897	2.7901
0.15947	-0.48827	0.15949	4.66134	0.15951	2.10969	0.16085	3.59925	0.15949	-2.19515	0.15947	1.92254	0.15913	2.78988
0.15964	-0.48808	0.15966	4.6623	0.15968	2.11006	0.16102	3.60424	0.15965	-2.19027	0.15963	1.92326	0.1593	2.79272
0.1598	-0.488	0.15983	4.66292	0.15984	2.11019	0.16119	3.60436	0.15982	-2.18875	0.1598	1.92398	0.15947	2.79568
0.15997	-0.48816	0.15999	4.66372	0.16001	2.11019	0.16135	3.59998	0.15998	-2.18824	0.15997	1.92424	0.15963	2.79988
0.16014	-0.4889	0.16016	4.66502	0.16018	2.11013	0.16152	3.59754	0.16015	-2.18876	0.16013	1.92388	0.1598	2.80417
0.1603	-0.49064	0.16033	4.66611	0.16034	2.10964	0.16169	3.59922	0.16032	-2.18941	0.1603	1.92209	0.15997	2.80819
0.16047	-0.49277	0.16049	4.66598	0.16051	2.10915	0.16185	3.60196	0.16048	-2.18919	0.16047	1.9203	0.16013	2.81197
0.16064	-0.49447	0.16066	4.6641	0.16068	2.10968	0.16202	3.60262	0.16065	-2.18733	0.16063	1.91922	0.1603	2.81504
0.1608	-0.49541	0.16082	4.66113	0.16084	2.11062	0.16218	3.60221	0.16082	-2.18596	0.1608	1.91923	0.16047	2.81743
0.16097	-0.4956	0.16099	4.65746	0.16101	2.11119	0.16235	3.59929	0.16098	-2.18555	0.16097	1.91991	0.16063	2.82013
0.16114	-0.49479	0.16116	4.65387	0.16117	2.11116	0.16252	3.59348	0.16115	-2.18535	0.16113	1.92104	0.1608	2.82402
0.1613	-0.49393	0.16132	4.65141	0.16134	2.11087	0.16268	3.59555	0.16132	-2.18617	0.1613	1.92213	0.16096	2.82848
0.16147	-0.49292	0.16149	4.64902	0.16151	2.11044	0.16285	3.60621	0.16148	-2.18759	0.16146	1.92268	0.16113	2.83257
0.16164	-0.49208	0.16166	4.6461	0.16167	2.10997	0.16302	3.61688	0.16165	-2.18846	0.16163	1.92307	0.1613	2.83673
0.1618	-0.49182	0.16182	4.64312	0.16184	2.11036	0.16318	3.62503	0.16182	-2.18903	0.1618	1.92326	0.16146	2.84013
0.16197	-0.49189	0.16199	4.64046	0.16201	2.11125	0.16335	3.63033	0.16198	-2.18957	0.16196	1.92343	0.16163	2.84059
0.16214	-0.49179	0.16216	4.6385	0.16217	2.11148	0.16352	3.63134	0.16215	-2.19011	0.16213	1.92338	0.1618	2.8411
0.1623	-0.49138	0.16232	4.63799	0.16234	2.11133	0.16368	3.62965	0.16232	-2.19073	0.1623	1.92185	0.16196	2.84169
0.16247	-0.49072	0.16249	4.63913	0.16251	2.11057	0.16385	3.63156	0.16248	-2.19169	0.16246	1.9206	0.16213	2.84229
0.16263	-0.48979	0.16266	4.64017	0.16267	2.10808	0.16402	3.63891	0.16265	-2.19263	0.16263	1.92034	0.1623	2.84288
0.1628	-0.48904	0.16282	4.64081	0.16284	2.10481	0.16418	3.6469	0.16281	-2.1936	0.1628	1.9201	0.16246	2.84354
0.16297	-0.48946	0.16299	4.64089	0.16301	2.10102	0.16435	3.65287	0.16298	-2.19485	0.16296	1.92051	0.16263	2.8447
0.16313	-0.49112	0.16315	4.63963	0.16317	2.09695	0.16452	3.65828	0.16315	-2.19752	0.16313	1.9215	0.1628	2.84613
0.1633	-0.49253	0.16332	4.63777	0.16334	2.09336	0.16468	3.66187	0.16331	-2.20156	0.1633	1.92202	0.16296	2.84746
0.16347	-0.49371	0.16349	4.63585	0.16351	2.09027	0.16485	3.66421	0.16348	-2.20567	0.16346	1.92223	0.16313	2.84858
0.16363	-0.49436	0.16365	4.63368	0.16367	2.08758	0.16502	3.66846	0.16365	-2.20999	0.16363	1.92243	0.16329	2.84886
0.1638	-0.49367	0.16382	4.63157	0.16384	2.08518	0.16518	3.67405	0.16381	-2.21339	0.16379	1.9224	0.16346	2.84652
0.16397	-0.49208	0.16399	4.62979	0.164	2.08278	0.16535	3.68007	0.16398	-2.21377	0.16396	1.92238	0.16363	2.84407
0.16413	-0.49024	0.16415	4.62793	0.16417	2.07964	0.16551	3.68699	0.16415	-2.21345	0.16413	1.92279	0.16379	2.84143
0.1643	-0.48829	0.16432	4.62533	0.16434	2.07637	0.16568	3.692	0.16431	-2.2132	0.16429	1.92324	0.16396	2.83847
0.16447	-0.48687	0.16449	4.62231	0.1645	2.07353	0.16585	3.69291	0.16448	-2.21322	0.16446	1.92431	0.16413	2.83558
0.16463	-0.48613	0.16465	4.62061	0.16467	2.0709	0.16601	3.6921	0.16465	-2.21421	0.16463	1.92651	0.16429	2.83294
0.1648	-0.48596	0.16482	4.62024	0.16484	2.06767	0.16618	3.69093	0.16481	-2.21674	0.16479	1.92798	0.16446	2.83059
0.16496	-0.4864	0.16499	4.61984	0.165	2.06364	0.16635	3.68942	0.16498	-2.21919	0.16496	1.92843	0.16463	2.82908
0.16513	-0.48703	0.16515	4.61945	0.16517	2.05998	0.16651	3.69083	0.16514	-2.2213	0.16513	1.92882	0.16479	2.82773
0.1653	-0.48836	0.16532	4.61866	0.16534	2.05684	0.16668	3.69465	0.16531	-2.22281	0.16529	1.92848	0.16496	2.82521
0.16546	-0.49032	0.16548	4.61697	0.1655	2.05383	0.16685	3.6978	0.16548	-2.22335	0.16546	1.92788	0.16513	2.82214
0.16563	-0.49242	0.16565	4.61513	0.16567	2.05079	0.16701	3.69685	0.16564	-2.22318	0.16563	1.92781	0.16529	2.81929
0.1658	-0.49461	0.16582	4.61353	0.16584	2.04783	0.16718	3.69435	0.16581	-2.22358	0.16579	1.92789	0.16546	2.81704
0.16596	-0.49604	0.16598	4.61239	0.166	2.04395	0.16735	3.6946	0.16598	-2.22536	0.16596	1.92828	0.16562	2.81567
0.16613	-0.49626	0.16615	4.61096	0.16617	2.03958	0.16751	3.69616	0.16614	-2.22733	0.16612	1.92997	0.16579	2.81699
0.1663	-0.49632	0.16632	4.60906	0.16634	2.03557	0.16768	3.6983	0.16631	-2.22929	0.16629	1.93207	0.16596	2.81845
0.16646	-0.49666	0.16648	4.60703	0.1665	2.03229	0.16785	3.70113	0.16648	-2.23128	0.16646	1.93545	0.16612	2.82033
0.16663	-0.49699	0.16665	4.60469	0.16667	2.02995	0.16801	3.70002	0.16664	-2.23318	0.16662	1.93886	0.16629	2.8226
0.1668	-0.49664	0.16682	4.60246	0.16684	2.02932	0.16818	3.69364	0.16681	-2.23497	0.16679	1.942	0.16646	2.82492
0.16696	-0.49533	0.16698	4.60064	0.167	2.02914	0.16834	3.68555	0.16698	-2.23674	0.16696	1.94484	0.16662	2.82721
0.16713	-0.49269	0.16715	4.59895	0.16717	2.02912	0.16851	3.67918	0.16714	-2.23854	0.16712	1.94706	0.16679	2.83035
0.16729	-0.48899	0.16732	4.59743	0.16733	2.02925	0.16868	3.674	0.16731	-2.24025	0.16729	1.94868	0.16696	2.83573
0.16746	-0.48575	0.16748	4.59616	0.1675	2.02885	0.16884	3.67083	0.16748	-2.24173	0.16746	1.95022	0.16712	2.84183
0.16763	-0.48335	0.16765	4.59509	0.16767	2.02808	0.16901	3.6688	0.16764	-2.24288	0.16762	1.95089	0.16729	2.84806
0.16779	-0.48202	0.16781	4.59425	0.16783	2.02726	0.16918	3.66665	0.16781	-2.24382	0.16779	1.95147	0.16746	2.85442
0.16796	-0.48203	0.16798	4.59333	0.168	2.02706	0.16934	3.66422	0.16797	-2.24465	0.16796	1.95228	0.16762	2.86036
0.16813	-0.48272	0.16815	4.59193	0.16817	2.02706	0.16951	3.66122	0.16814	-2.24485	0.16812	1.95314	0.16779	2.8658
0.16829	-0.4831	0.16831	4.59042	0.16833	2.0278	0.16968	3.65724	0.16831	-2.24366	0.16829	1.95428	0.16795	2.87141
0.16846	-0.48314	0.16848	4.58974	0.1685	2.02874	0.16984	3.65291	0.16847	-2.24211	0.16845	1.95585	0.16812	2.87749
0.16863	-0.48257	0.16865	4.58949	0.16867	2.02911	0.17001	3.64579	0.16864	-2.2404	0.16862	1.95674	0.16829	2.88387
0.16879	-0.48138	0.16881	4.58891	0.16883	2.02807	0.17018	3.63664	0.16881	-2.23884	0.16879	1.95652	0.16845	2.89187
0.16896	-0.48031	0.16898	4.58777	0.169	2.02743	0.17034	3.62757	0.16897	-2.238	0.16895	1.95637	0.16862	2.90077
0.16913	-0.47979	0.16915	4.58643	0.16917	2.02753	0.17051	3.61881	0.16914	-2.2382	0.16912	1.95665	0.16879	2.90857
0.16929	-0.47941	0.16931	4.58511	0.16933	2.02776	0.17068	3.61149	0.16931	-2.23876	0.16929	1.95722	0.16895	2.91594
0.16946	-0.47827	0.16948	4.5838	0.1695	2.02899	0.17084	3.61032	0.16947	-2.23955	0.16945	1.95852	0.16912	2.92358
0.16963	-0.47665	0.16965	4.58291	0.16967	2.03086	0.17101	3.61289	0.16964	-2.24021	0.16962	1.96009	0.16929	2.93192
0.16979	-0.47454	0.16981	4.58228	0.16983	2.03277	0.17118	3.61992	0.16981	-2.2405	0.16979	1.96181	0.16945	2.94021
0.16996	-0.47184	0.16998	4.58115	0.17	2.03459	0.17134	3.62875	0.16997	-2.23979	0.16995	1.96424	0.16962	2.9478
0.17012	-0.4698	0.17015	4.57977	0.17017	2.03651	0.17151	3.64135	0.17014	-2.2379	0.17012	1.96628	0.16979	2.95568
0.17029	-0.46888	0.17031	4.57851	0.17033	2.03883	0.17167	3.65776	0.17031	-2.23588	0.17029	1.96709	0.16995	2.96477
0.17046	-0.46829	0.17048	4.57746	0.1705	2.04088	0.17184	3.67484	0.17047	-2.23468	0.17045	1.96792	0.17012	2.97502
0.17062	-0.46772	0.17064	4.57666	0.17066	2.04211	0.17201	3.69094	0.17064	-2.23433	0.17062	1.96868	0.17028	2.98482
0.17079	-0.46725	0.17081	4.57613	0.17083	2.0432	0.17217	3.70667	0.1708	-2.23407	0.17078	1.96944	0.17045	2.99427
0.17096	-0.46757	0.17098	4.57569	0.171	2.04385	0.17234	3.71399	0.17097	-2.23392	0.17095	1.97043	0.17062	3.00341
0.17112	-0.46846	0.17114	4.57506	0.17116	2.04397	0.17251	3.71738	0.17114	-2.23387	0.17112	1.97161	0.17078	3.01205
0.17129	-0.46969	0.17131	4.57429	0.17133	2.04386	0.17267	3.71881	0.1713	-2.23407	0.17128	1.97259	0.17095	3.01975
0.17146	-0.47154	0.17148	4.57326	0.1715	2.04359	0.17284	3.71938	0.17147	-2.23456	0.17145	1.97263	0.17112	3.02527
0.17162	-0.47317	0.17164	4.57205	0.17166	2.0433	0.17301	3.7226	0.17164	-2.23535	0.17162	1.97263	0.17128	3.03026
0.17179	-0.47392	0.17181	4.5706	0.17183	2.043	0.17317	3.73103	0.1718	-2.23624	0.17178	1.97346	0.17145	3.03683
0.17196	-0.47431	0.17198	4.56803	0.172	2.0427	0.17334	3.74089	0.17197	-2.23719	0.17195	1.97441	0.17162	3.04646
0.17212	-0.47476	0.17214	4.56503	0.17216	2.04174	0.17351	3.75121	0.17214	-2.23817	0.17212	1.9757	0.17178	3.05639
0.17229	-0.47529	0.17231	4.56263	0.17233	2.04067	0.17367	3.76142	0.1723	-2.24022	0.17228	1.97759	0.17195	3.06701
0.17245	-0.4762	0.17248	4.56044	0.1725	2.03961	0.17384	3.76894	0.17247	-2.2434	0.17245	1.97917	0.17212	3.07705
0.17262	-0.47741	0.17264	4.55901	0.17266	2.0385	0.17401	3.77471	0.17264	-2.24674	0.17262	1.98032	0.17228	3.08555
0.17279	-0.47869	0.17281	4.55851	0.17283	2.03796	0.17417	3.78309	0.1728	-2.25036	0.17278	1.98143	0.17245	3.09203
0.17295	-0.48039	0.17297	4.55871	0.173	2.0389	0.17434	3.79346	0.17297	-2.25392	0.17295	1.9823	0.17261	3.09707
0.17312	-0.48216	0.17314	4.55941	0.17316	2.04	0.17451	3.80472	0.17313	-2.25654	0.17311	1.98295	0.17278	3.1012
0.17329	-0.48333	0.17331	4.56025	0.17333	2.04109	0.17467	3.81785	0.1733	-2.25857	0.17328	1.98317	0.17295	3.10239
0.17345	-0.4842	0.17347	4.55988	0.1735	2.04222	0.17484	3.83036	0.17347	-2.26022	0.17345	1.98324	0.17311	3.0981
0.17362	-0.48459	0.17364	4.55893	0.17366	2.04222	0.175	3.83617	0.17363	-2.26123	0.17361	1.98353	0.17328	3.09164
0.17379	-0.48421	0.17381	4.55748	0.17383	2.04166	0.17517	3.83992	0.1738	-2.26221	0.17378	1.98455	0.17345	3.08463
0.17395	-0.48408	0.17397	4.55581	0.17399	2.04107	0.17534	3.84034	0.17397	-2.26354	0.17395	1.98536	0.17361	3.07751
0.17412	-0.48455	0.17414	4.55403	0.17416	2.04036	0.1755	3.83767	0.17413	-2.26497	0.17411	1.98548	0.17378	3.06908
0.17429	-0.48518	0.17431	4.55201	0.17433	2.03963	0.17567	3.83029	0.1743	-2.26735	0.17428	1.98566	0.17395	3.05832
0.17445	-0.48628	0.17447	4.54979	0.17449	2.03843	0.17584	3.81937	0.17447	-2.27054	0.17445	1.98613	0.17411	3.04641
0.17462	-0.48771	0.17464	4.54735	0.17466	2.03724	0.176	3.80814	0.17463	-2.27275	0.17461	1.98691	0.17428	3.03342
0.17478	-0.48913	0.17481	4.5449	0.17483	2.03532	0.17617	3.79155	0.1748	-2.27432	0.17478	1.98775	0.17445	3.02003
0.17495	-0.49049	0.17497	4.54231	0.17499	2.03266	0.17634	3.77316	0.17497	-2.27597	0.17495	1.98862	0.17461	3.00602
0.17512	-0.49166	0.17514	4.53968	0.17516	2.03054	0.1765	3.76328	0.17513	-2.27789	0.17511	1.98908	0.17478	2.99173
0.17528	-0.49229	0.1753	4.5372	0.17533	2.02886	0.17667	3.7571	0.1753	-2.27976	0.17528	1.98819	0.17494	2.9781
0.17545	-0.49229	0.17547	4.53489	0.17549	2.02721	0.17684	3.75366	0.17547	-2.28134	0.17544	1.98731	0.17511	2.96455
0.17562	-0.49182	0.17564	4.53264	0.17566	2.02599	0.177	3.75536	0.17563	-2.28281	0.17561	1.98729	0.17528	2.95019
0.17578	-0.49093	0.1758	4.5308	0.17583	2.02483	0.17717	3.75594	0.1758	-2.28395	0.17578	1.9875	0.17544	2.93465
0.17595	-0.49008	0.17597	4.52938	0.17599	2.02368	0.17734	3.75138	0.17596	-2.28476	0.17594	1.9879	0.17561	2.91695
0.17612	-0.48851	0.17614	4.52913	0.17616	2.02258	0.1775	3.74546	0.17613	-2.28544	0.17611	1.98855	0.17578	2.89689
0.17628	-0.48662	0.1763	4.52928	0.17633	2.02086	0.17767	3.73443	0.1763	-2.28609	0.17628	1.98882	0.17594	2.87662
0.17645	-0.48458	0.17647	4.52885	0.17649	2.01674	0.17784	3.71919	0.17646	-2.28685	0.17644	1.98847	0.17611	2.85495
0.17662	-0.48244	0.17664	4.52782	0.17666	2.01276	0.178	3.70653	0.17663	-2.28878	0.17661	1.98837	0.17628	2.83343
0.17678	-0.48033	0.1768	4.52584	0.17683	2.00867	0.17817	3.69536	0.1768	-2.29127	0.17678	1.98904	0.17644	2.81389
0.17695	-0.47895	0.17697	4.52294	0.17699	2.00458	0.17833	3.68562	0.17696	-2.2935	0.17694	1.99018	0.17661	2.79539
0.17712	-0.47859	0.17714	4.51981	0.17716	2.00174	0.1785	3.68493	0.17713	-2.2956	0.17711	1.99155	0.17678	2.77597
0.17728	-0.47797	0.1773	4.51761	0.17732	1.99953	0.17867	3.6869	0.1773	-2.29756	0.17728	1.99301	0.17694	2.75576
0.17745	-0.47689	0.17747	4.51568	0.17749	1.99731	0.17883	3.68658	0.17746	-2.29941	0.17744	1.99404	0.17711	2.73877
0.17761	-0.47562	0.17763	4.51507	0.17766	1.99517	0.179	3.68562	0.17763	-2.30163	0.17761	1.994	0.17727	2.72673
0.17778	-0.47372	0.1778	4.5149	0.17782	1.99295	0.17917	3.68247	0.1778	-2.30453	0.17778	1.99366	0.17744	2.71623
0.17795	-0.47159	0.17797	4.51402	0.17799	1.99081	0.17933	3.67634	0.17796	-2.3076	0.17794	1.99267	0.17761	2.70478
0.17811	-0.47026	0.17813	4.51192	0.17816	1.98877	0.1795	3.67288	0.17813	-2.3104	0.17811	1.99148	0.17777	2.69236
0.17828	-0.46946	0.1783	4.50961	0.17832	1.98675	0.17967	3.6725	0.17829	-2.31299	0.17827	1.98941	0.17794	2.68147
0.17845	-0.46841	0.17847	4.50751	0.17849	1.98472	0.17983	3.67278	0.17846	-2.31442	0.17844	1.9865	0.17811	2.67224
0.17861	-0.46675	0.17863	4.50551	0.17866	1.98221	0.18	3.67355	0.17863	-2.31525	0.17861	1.98328	0.17827	2.66254
0.17878	-0.46479	0.1788	4.50418	0.17882	1.97879	0.18017	3.6745	0.17879	-2.31616	0.17877	1.97981	0.17844	2.65191
0.17895	-0.46229	0.17897	4.50326	0.17899	1.97612	0.18033	3.68075	0.17896	-2.31745	0.17894	1.97684	0.17861	2.64128
0.17911	-0.45972	0.17913	4.50249	0.17916	1.97422	0.1805	3.68868	0.17913	-2.31883	0.17911	1.97496	0.17877	2.63126
0.17928	-0.45716	0.1793	4.50178	0.17932	1.97237	0.18067	3.69746	0.17929	-2.31992	0.17927	1.97391	0.17894	2.62152
0.17945	-0.4547	0.17947	4.50101	0.17949	1.97282	0.18083	3.7088	0.17946	-2.32094	0.17944	1.97408	0.17911	2.61152
0.17961	-0.45277	0.17963	4.49999	0.17966	1.97387	0.181	3.71809	0.17963	-2.32193	0.17961	1.97448	0.17927	2.60102
0.17978	-0.45143	0.1798	4.49878	0.17982	1.97451	0.18117	3.72184	0.17979	-2.32288	0.17977	1.9747	0.17944	2.59131
0.17994	-0.45035	0.17997	4.49719	0.17999	1.97506	0.18133	3.72455	0.17996	-2.32416	0.17994	1.97465	0.1796	2.58257
0.18011	-0.44993	0.18013	4.49551	0.18016	1.97527	0.1815	3.72953	0.18013	-2.32578	0.18011	1.97438	0.17977	2.57396
0.18028	-0.45002	0.1803	4.49375	0.18032	1.97436	0.18166	3.73601	0.18029	-2.32742	0.18027	1.97384	0.17994	2.56505
0.18044	-0.4508	0.18046	4.49191	0.18049	1.97416	0.18183	3.74826	0.18046	-2.32893	0.18044	1.97363	0.1801	2.55621
0.18061	-0.45181	0.18063	4.49068	0.18065	1.97626	0.182	3.76419	0.18063	-2.33024	0.1806	1.97424	0.18027	2.54842
0.18078	-0.45259	0.1808	4.49005	0.18082	1.97827	0.18216	3.78034	0.18079	-2.33025	0.18077	1.97495	0.18044	2.5412
0.18094	-0.45299	0.18096	4.4895	0.18099	1.98004	0.18233	3.79314	0.18096	-2.3298	0.18094	1.9749	0.1806	2.53336
0.18111	-0.45262	0.18113	4.48677	0.18115	1.98161	0.1825	3.80412	0.18112	-2.32948	0.1811	1.97449	0.18077	2.52449
0.18128	-0.45104	0.1813	4.48336	0.18132	1.98205	0.18266	3.80492	0.18129	-2.32933	0.18127	1.97276	0.18094	2.51567
0.18144	-0.44949	0.18146	4.47904	0.18149	1.98181	0.18283	3.80363	0.18146	-2.32932	0.18144	1.96864	0.1811	2.50783
0.18161	-0.44794	0.18163	4.47441	0.18165	1.98165	0.183	3.80379	0.18162	-2.32946	0.1816	1.96513	0.18127	2.50028
0.18178	-0.44664	0.1818	4.47046	0.18182	1.98229	0.18316	3.80561	0.18179	-2.32963	0.18177	1.96254	0.18144	2.49107
0.18194	-0.44596	0.18196	4.46803	0.18199	1.98302	0.18333	3.81018	0.18196	-2.32986	0.18194	1.96034	0.1816	2.48062
0.18211	-0.44569	0.18213	4.46664	0.18215	1.98366	0.1835	3.81776	0.18212	-2.33014	0.1821	1.95926	0.18177	2.47133
0.18227	-0.44619	0.1823	4.46654	0.18232	1.9843	0.18366	3.82554	0.18229	-2.33076	0.18227	1.95934	0.18193	2.46302
0.18244	-0.44807	0.18246	4.46665	0.18249	1.98485	0.18383	3.83743	0.18246	-2.33154	0.18244	1.96029	0.1821	2.45492
0.18261	-0.45038	0.18263	4.46659	0.18265	1.98529	0.184	3.85012	0.18262	-2.33255	0.1826	1.96189	0.18227	2.44774
0.18277	-0.45324	0.18279	4.46642	0.18282	1.98632	0.18416	3.86272	0.18279	-2.33449	0.18277	1.96314	0.18243	2.44164
0.18294	-0.45605	0.18296	4.46546	0.18299	1.98809	0.18433	3.87486	0.18296	-2.33654	0.18293	1.96371	0.1826	2.43647
0.18311	-0.45838	0.18313	4.46415	0.18315	1.9897	0.1845	3.89094	0.18312	-2.33819	0.1831	1.96355	0.18277	2.43168
0.18327	-0.46022	0.18329	4.46282	0.18332	1.99013	0.18466	3.91549	0.18329	-2.33971	0.18327	1.96236	0.18293	2.42887
0.18344	-0.4621	0.18346	4.46142	0.18348	1.98984	0.18483	3.93989	0.18346	-2.34048	0.18343	1.96092	0.1831	2.42852
0.18361	-0.46399	0.18363	4.46004	0.18365	1.98733	0.18499	3.96157	0.18362	-2.34051	0.1836	1.95921	0.18327	2.42929
0.18377	-0.46577	0.18379	4.45896	0.18382	1.98428	0.18516	3.98296	0.18379	-2.34045	0.18377	1.95728	0.18343	2.43044
0.18394	-0.46731	0.18396	4.45791	0.18398	1.9811	0.18533	3.99762	0.18395	-2.34043	0.18393	1.9555	0.1836	2.43152
0.18411	-0.46848	0.18413	4.45622	0.18415	1.97757	0.18549	4.00851	0.18412	-2.34041	0.1841	1.95398	0.18377	2.43153
0.18427	-0.46904	0.18429	4.45385	0.18432	1.97435	0.18566	4.01652	0.18429	-2.34083	0.18427	1.95326	0.18393	2.4309
0.18444	-0.46936	0.18446	4.45151	0.18448	1.97218	0.18583	4.02316	0.18445	-2.34138	0.18443	1.95423	0.1841	2.43053
0.18461	-0.46938	0.18463	4.44918	0.18465	1.97008	0.18599	4.02869	0.18462	-2.34207	0.1846	1.95555	0.18426	2.4303
0.18477	-0.46904	0.18479	4.44689	0.18482	1.96801	0.18616	4.02513	0.18479	-2.34283	0.18477	1.95607	0.18443	2.43128
0.18494	-0.46895	0.18496	4.44424	0.18498	1.96613	0.18633	4.02108	0.18495	-2.34319	0.18493	1.95623	0.1846	2.43436
0.1851	-0.46913	0.18512	4.44155	0.18515	1.96447	0.18649	4.02085	0.18512	-2.34289	0.1851	1.9554	0.18476	2.43902
0.18527	-0.46986	0.18529	4.44121	0.18532	1.96291	0.18666	4.02093	0.18529	-2.34231	0.18526	1.95337	0.18493	2.44476
0.18544	-0.47188	0.18546	4.44138	0.18548	1.96124	0.18683	4.02679	0.18545	-2.34156	0.18543	1.9533	0.1851	2.45084
0.1856	-0.47469	0.18562	4.44195	0.18565	1.95872	0.18699	4.03884	0.18562	-2.34077	0.1856	1.95499	0.18526	2.4569
0.18577	-0.47749	0.18579	4.44346	0.18582	1.95597	0.18716	4.04983	0.18579	-2.34237	0.18576	1.95736	0.18543	2.46293
0.18594	-0.48025	0.18596	4.44436	0.18598	1.95246	0.18733	4.05916	0.18595	-2.34503	0.18593	1.96143	0.1856	2.47066
0.1861	-0.48255	0.18612	4.44363	0.18615	1.94893	0.18749	4.06839	0.18612	-2.34774	0.1861	1.96583	0.18576	2.47967
0.18627	-0.4842	0.18629	4.44277	0.18632	1.94596	0.18766	4.07779	0.18628	-2.35045	0.18626	1.96906	0.18593	2.48887
0.18644	-0.48484	0.18646	4.44038	0.18648	1.9439	0.18782	4.08727	0.18645	-2.35272	0.18643	1.97167	0.1861	2.49826
0.1866	-0.48424	0.18662	4.43721	0.18665	1.94194	0.18799	4.09247	0.18662	-2.35309	0.1866	1.97335	0.18626	2.50717
0.18677	-0.48397	0.18679	4.43419	0.18681	1.94015	0.18816	4.0968	0.18678	-2.35289	0.18676	1.97412	0.18643	2.51502
0.18694	-0.48516	0.18696	4.43133	0.18698	1.93837	0.18832	4.10212	0.18695	-2.35168	0.18693	1.9753	0.18659	2.52229
0.1871	-0.48767	0.18712	4.42843	0.18715	1.93642	0.18849	4.11078	0.18712	-2.35031	0.1871	1.97694	0.18676	2.52968
0.18727	-0.49066	0.18729	4.42862	0.18731	1.93467	0.18866	4.1158	0.18728	-2.34807	0.18726	1.97862	0.18693	2.53732
0.18743	-0.49407	0.18746	4.42903	0.18748	1.93406	0.18882	4.11177	0.18745	-2.34503	0.18743	1.97998	0.18709	2.54406
0.1876	-0.49676	0.18762	4.42953	0.18765	1.93387	0.18899	4.10704	0.18762	-2.3428	0.18759	1.98127	0.18726	2.54818
0.18777	-0.49828	0.18779	4.43002	0.18781	1.93399	0.18916	4.1026	0.18778	-2.34126	0.18776	1.98289	0.18743	2.55108
0.18793	-0.49956	0.18795	4.43055	0.18798	1.93517	0.18932	4.09801	0.18795	-2.33984	0.18793	1.9847	0.18759	2.55405
0.1881	-0.50097	0.18812	4.43117	0.18815	1.93652	0.18949	4.10082	0.18812	-2.33918	0.18809	1.9861	0.18776	2.55786
0.18827	-0.50255	0.18829	4.43211	0.18831	1.93832	0.18966	4.1072	0.18828	-2.33874	0.18826	1.98704	0.18793	2.56198
0.18843	-0.50487	0.18845	4.43354	0.18848	1.94012	0.18982	4.1135	0.18845	-2.33784	0.18843	1.98651	0.18809	2.56711
0.1886	-0.50784	0.18862	4.4354	0.18865	1.942	0.18999	4.11809	0.18862	-2.33686	0.18859	1.98437	0.18826	2.57298
0.18877	-0.51114	0.18879	4.43722	0.18881	1.94401	0.19016	4.12372	0.18878	-2.33633	0.18876	1.98192	0.18843	2.57943
0.18893	-0.51474	0.18895	4.43692	0.18898	1.94592	0.19032	4.13889	0.18895	-2.3369	0.18893	1.97988	0.18859	2.58714
0.1891	-0.51824	0.18912	4.43611	0.18915	1.94773	0.19049	4.15442	0.18911	-2.338	0.18909	1.9781	0.18876	2.59514
0.18927	-0.52154	0.18929	4.4355	0.18931	1.94939	0.19066	4.16974	0.18928	-2.33978	0.18926	1.9779	0.18892	2.60127
0.18943	-0.52402	0.18945	4.43498	0.18948	1.95042	0.19082	4.18464	0.18945	-2.34165	0.18943	1.97825	0.18909	2.60609
0.1896	-0.52517	0.18962	4.43475	0.18965	1.95156	0.19099	4.19299	0.18961	-2.34343	0.18959	1.9789	0.18926	2.61067
0.18976	-0.5257	0.18979	4.43582	0.18981	1.95348	0.19115	4.1952	0.18978	-2.34517	0.18976	1.98033	0.18942	2.61466
0.18993	-0.52638	0.18995	4.43733	0.18998	1.95549	0.19132	4.19744	0.18995	-2.34434	0.18992	1.98107	0.18959	2.61859
0.1901	-0.52718	0.19012	4.43811	0.19014	1.95753	0.19149	4.19843	0.19011	-2.34257	0.19009	1.97988	0.18976	2.62258
0.19026	-0.52851	0.19028	4.43851	0.19031	1.95946	0.19165	4.19912	0.19028	-2.34071	0.19026	1.97833	0.18992	2.62686
0.19043	-0.53042	0.19045	4.43837	0.19048	1.96075	0.19182	4.19967	0.19045	-2.33884	0.19042	1.97598	0.19009	2.63232
0.1906	-0.53197	0.19062	4.43734	0.19064	1.96126	0.19199	4.20018	0.19061	-2.33742	0.19059	1.97313	0.19026	2.63919
0.19076	-0.53198	0.19078	4.43698	0.19081	1.96145	0.19215	4.20144	0.19078	-2.33801	0.19076	1.9715	0.19042	2.64585
0.19093	-0.5305	0.19095	4.43769	0.19098	1.96057	0.19232	4.20509	0.19095	-2.33878	0.19092	1.97051	0.19059	2.6523
0.1911	-0.52746	0.19112	4.43866	0.19114	1.95913	0.19249	4.20772	0.19111	-2.33962	0.19109	1.96962	0.19076	2.65755
0.19126	-0.52335	0.19128	4.43986	0.19131	1.9578	0.19265	4.2069	0.19128	-2.34056	0.19126	1.96897	0.19092	2.65962
0.19143	-0.51995	0.19145	4.44125	0.19148	1.95652	0.19282	4.206	0.19144	-2.34247	0.19142	1.96844	0.19109	2.66038
0.1916	-0.51739	0.19162	4.44053	0.19164	1.95459	0.19299	4.20398	0.19161	-2.34511	0.19159	1.9683	0.19125	2.66066
0.19176	-0.51573	0.19178	4.43858	0.19181	1.95106	0.19315	4.20121	0.19178	-2.34779	0.19176	1.96822	0.19142	2.66074
0.19193	-0.51526	0.19195	4.43659	0.19198	1.94705	0.19332	4.19843	0.19194	-2.35125	0.19192	1.96817	0.19159	2.66047
0.1921	-0.51517	0.19212	4.43447	0.19214	1.94216	0.19349	4.1957	0.19211	-2.35475	0.19209	1.96816	0.19175	2.65957
0.19226	-0.51557	0.19228	4.43219	0.19231	1.93748	0.19365	4.19301	0.19228	-2.35742	0.19226	1.96871	0.19192	2.65824
0.19243	-0.5163	0.19245	4.42981	0.19248	1.93374	0.19382	4.19211	0.19244	-2.35985	0.19242	1.96967	0.19209	2.65625
0.19259	-0.51626	0.19261	4.42738	0.19264	1.9308	0.19399	4.19135	0.19261	-2.36199	0.19259	1.9707	0.19225	2.65408
0.19276	-0.51565	0.19278	4.42465	0.19281	1.92771	0.19415	4.19222	0.19278	-2.36351	0.19275	1.97178	0.19242	2.65151
0.19293	-0.51507	0.19295	4.42163	0.19298	1.92457	0.19432	4.19292	0.19294	-2.36452	0.19292	1.97282	0.19259	2.64817
0.19309	-0.51456	0.19311	4.42019	0.19314	1.92204	0.19448	4.1907	0.19311	-2.36479	0.19309	1.97335	0.19275	2.64357
0.19326	-0.51419	0.19328	4.41999	0.19331	1.92103	0.19465	4.1845	0.19328	-2.36462	0.19325	1.97373	0.19292	2.63819
0.19343	-0.51406	0.19345	4.41993	0.19347	1.92061	0.19482	4.17859	0.19344	-2.36475	0.19342	1.9744	0.19309	2.6333
0.19359	-0.51404	0.19361	4.4191	0.19364	1.92075	0.19498	4.17318	0.19361	-2.36563	0.19359	1.97582	0.19325	2.62933
0.19376	-0.51349	0.19378	4.41757	0.19381	1.92081	0.19515	4.16834	0.19378	-2.36691	0.19375	1.97692	0.19342	2.6258
0.19393	-0.51252	0.19395	4.41461	0.19397	1.91961	0.19532	4.16894	0.19394	-2.36828	0.19392	1.97716	0.19358	2.62285
0.19409	-0.51137	0.19411	4.41115	0.19414	1.91681	0.19548	4.17187	0.19411	-2.36969	0.19409	1.9773	0.19375	2.61955
0.19426	-0.51008	0.19428	4.40812	0.19431	1.91399	0.19565	4.17585	0.19427	-2.37109	0.19425	1.97601	0.19392	2.61493
0.19443	-0.50903	0.19445	4.40582	0.19447	1.9111	0.19582	4.18014	0.19444	-2.3719	0.19442	1.97393	0.19408	2.60872
0.19459	-0.50873	0.19461	4.40434	0.19464	1.90867	0.19598	4.18241	0.19461	-2.3725	0.19459	1.97266	0.19425	2.60115
0.19476	-0.50938	0.19478	4.40375	0.19481	1.90726	0.19615	4.17663	0.19477	-2.37313	0.19475	1.97186	0.19442	2.59239
0.19492	-0.5116	0.19494	4.40345	0.19497	1.90678	0.19632	4.16995	0.19494	-2.37379	0.19492	1.97116	0.19458	2.58377
0.19509	-0.5146	0.19511	4.40153	0.19514	1.90736	0.19648	4.16091	0.19511	-2.37486	0.19508	1.97103	0.19475	2.57593
0.19526	-0.51818	0.19528	4.39876	0.19531	1.90844	0.19665	4.15278	0.19527	-2.37659	0.19525	1.97093	0.19492	2.56967
0.19542	-0.52237	0.19544	4.39567	0.19547	1.9094	0.19682	4.15147	0.19544	-2.3785	0.19542	1.97056	0.19508	2.56641
0.19559	-0.52597	0.19561	4.39236	0.19564	1.91016	0.19698	4.15625	0.19561	-2.38032	0.19558	1.97017	0.19525	2.56426
0.19576	-0.52879	0.19578	4.38886	0.19581	1.91174	0.19715	4.1622	0.19577	-2.38212	0.19575	1.97067	0.19542	2.5625
0.19592	-0.5313	0.19594	4.38485	0.19597	1.91479	0.19732	4.16876	0.19594	-2.38328	0.19592	1.97209	0.19558	2.56133
0.19609	-0.53329	0.19611	4.38065	0.19614	1.91794	0.19748	4.17643	0.19611	-2.384	0.19608	1.97356	0.19575	2.56058
0.19626	-0.53494	0.19628	4.37658	0.19631	1.92149	0.19765	4.19208	0.19627	-2.38417	0.19625	1.97495	0.19591	2.56034
0.19642	-0.53599	0.19644	4.37259	0.19647	1.92513	0.19781	4.20836	0.19644	-2.38397	0.19642	1.97633	0.19608	2.56023
0.19659	-0.53676	0.19661	4.36927	0.19664	1.92782	0.19798	4.22297	0.19661	-2.38356	0.19658	1.97626	0.19625	2.56043
0.19676	-0.53705	0.19678	4.36668	0.1968	1.9298	0.19815	4.2374	0.19677	-2.38259	0.19675	1.97597	0.19641	2.56098
0.19692	-0.53661	0.19694	4.36452	0.19697	1.93169	0.19831	4.25056	0.19694	-2.38161	0.19692	1.97564	0.19658	2.56198
0.19709	-0.53584	0.19711	4.36263	0.19714	1.9334	0.19848	4.26141	0.1971	-2.38125	0.19708	1.9753	0.19675	2.56324
0.19725	-0.53502	0.19728	4.36062	0.1973	1.93425	0.19865	4.27439	0.19727	-2.38115	0.19725	1.97491	0.19691	2.56532
0.19742	-0.53417	0.19744	4.35683	0.19747	1.9337	0.19881	4.29081	0.19744	-2.38096	0.19741	1.97441	0.19708	2.56868
0.19759	-0.53527	0.19761	4.3527	0.19764	1.93283	0.19898	4.30734	0.1976	-2.3807	0.19758	1.97361	0.19725	2.5716
0.19775	-0.53788	0.19777	4.34937	0.1978	1.93185	0.19915	4.32257	0.19777	-2.37966	0.19775	1.97201	0.19741	2.57362
0.19792	-0.54139	0.19794	4.34631	0.19797	1.93103	0.19931	4.33708	0.19794	-2.37788	0.19791	1.97042	0.19758	2.57573
0.19809	-0.54525	0.19811	4.34352	0.19814	1.93161	0.19948	4.34827	0.1981	-2.37595	0.19808	1.96741	0.19775	2.57844
0.19825	-0.54895	0.19827	4.3409	0.1983	1.93361	0.19965	4.35648	0.19827	-2.37418	0.19825	1.96375	0.19791	2.58199
0.19842	-0.55102	0.19844	4.33779	0.19847	1.93513	0.19981	4.36357	0.19844	-2.37254	0.19841	1.96163	0.19808	2.58705
0.19859	-0.5521	0.19861	4.334	0.19864	1.93556	0.19998	4.37313	0.1986	-2.37147	0.19858	1.96023	0.19824	2.5932
0.19875	-0.55245	0.19877	4.32999	0.1988	1.93488	0.20015	4.39371	0.19877	-2.3707	0.19875	1.95902	0.19841	2.59835
0.19892	-0.55246	0.19894	4.32689	0.19897	1.93318	0.20031	4.41597	0.19894	-2.37043	0.19891	1.95912	0.19858	2.60189
0.19909	-0.55261	0.19911	4.32442	0.19914	1.93106	0.20048	4.44672	0.1991	-2.37095	0.19908	1.95916	0.19874	2.60467
0.19925	-0.55297	0.19927	4.32377	0.1993	1.92945	0.20065	4.47842	0.19927	-2.37125	0.19925	1.9586	0.19891	2.6068
0.19942	-0.55286	0.19944	4.32386	0.19947	1.92858	0.20081	4.50557	0.19943	-2.37091	0.19941	1.95804	0.19908	2.60883
0.19958	-0.55223	0.19961	4.32379	0.19963	1.92786	0.20098	4.52468	0.1996	-2.37036	0.19958	1.95599	0.19924	2.61231
0.19975	-0.55151	0.19977	4.32275	0.1998	1.92736	0.20114	4.53708	0.19977	-2.36913	0.19974	1.95241	0.19941	2.61732
0.19992	-0.54935	0.19994	4.32173	0.19997	1.92687	0.20131	4.54266	0.19993	-2.36759	0.19991	1.94786	0.19958	2.62184
0.20008	-0.54633	0.2001	4.32127	0.20013	1.92607	0.20148	4.54705	0.2001	-2.36671	0.20008	1.94254	0.19974	2.62591
0.20025	-0.54361	0.20027	4.32098	0.2003	1.92451	0.20164	4.55023	0.20027	-2.36619	0.20024	1.9372	0.19991	2.62964
0.20042	-0.54117	0.20044	4.32158	0.20047	1.92274	0.20181	4.55286	0.20043	-2.36572	0.20041	1.93389	0.20008	2.63249
0.20058	-0.53902	0.2006	4.32303	0.20063	1.92056	0.20198	4.54797	0.2006	-2.36522	0.20058	1.93095	0.20024	2.63467
0.20075	-0.53805	0.20077	4.3238	0.2008	1.91812	0.20214	4.54084	0.20077	-2.36495	0.20074	1.92951	0.20041	2.63655
0.20092	-0.53807	0.20094	4.32402	0.20097	1.91577	0.20231	4.53501	0.20093	-2.36525	0.20091	1.92817	0.20058	2.63829
0.20108	-0.53885	0.2011	4.32414	0.20113	1.91363	0.20248	4.53519	0.2011	-2.36574	0.20108	1.92608	0.20074	2.64038
0.20125	-0.53987	0.20127	4.32347	0.2013	1.91159	0.20264	4.53718	0.20127	-2.36581	0.20124	1.92256	0.20091	2.64295
0.20142	-0.5409	0.20144	4.32274	0.20147	1.9097	0.20281	4.5417	0.20143	-2.36557	0.20141	1.91908	0.20107	2.64465
0.20158	-0.54193	0.2016	4.32385	0.20163	1.90785	0.20298	4.54679	0.2016	-2.36535	0.20158	1.91568	0.20124	2.64521
0.20175	-0.54077	0.20177	4.32534	0.2018	1.90609	0.20314	4.55139	0.20177	-2.36521	0.20174	1.9122	0.20141	2.64563
0.20192	-0.53833	0.20194	4.32703	0.20197	1.90472	0.20331	4.55573	0.20193	-2.36509	0.20191	1.90777	0.20157	2.64583
0.20208	-0.5356	0.2021	4.32895	0.20213	1.90339	0.20348	4.56076	0.2021	-2.36499	0.20207	1.90283	0.20174	2.64567
0.20225	-0.53437	0.20227	4.33075	0.2023	1.90225	0.20364	4.5665	0.20226	-2.36489	0.20224	1.8994	0.20191	2.64491
0.20241	-0.53411	0.20243	4.33225	0.20247	1.90109	0.20381	4.57228	0.20243	-2.36466	0.20241	1.89654	0.20207	2.64371
0.20258	-0.53544	0.2026	4.33371	0.20263	1.89977	0.20398	4.58487	0.2026	-2.36439	0.20257	1.89389	0.20224	2.64319
0.20275	-0.53737	0.20277	4.33369	0.2028	1.89845	0.20414	4.5986	0.20276	-2.36452	0.20274	1.89204	0.20241	2.64387
0.20291	-0.53878	0.20293	4.33296	0.20296	1.89824	0.20431	4.59894	0.20293	-2.36518	0.20291	1.88999	0.20257	2.64606
0.20308	-0.53927	0.2031	4.3311	0.20313	1.89897	0.20447	4.59752	0.2031	-2.36539	0.20307	1.88668	0.20274	2.64989
0.20325	-0.53931	0.20327	4.3287	0.2033	1.89938	0.20464	4.5972	0.20326	-2.36484	0.20324	1.88338	0.20291	2.65425
0.20341	-0.53913	0.20343	4.3265	0.20346	1.89761	0.20481	4.5987	0.20343	-2.36408	0.20341	1.87944	0.20307	2.65871
0.20358	-0.53889	0.2036	4.32505	0.20363	1.89545	0.20497	4.60589	0.2036	-2.36301	0.20357	1.87502	0.20324	2.66315
0.20375	-0.53944	0.20377	4.32402	0.2038	1.89221	0.20514	4.62196	0.20376	-2.36176	0.20374	1.87208	0.2034	2.66599
0.20391	-0.54046	0.20393	4.32396	0.20396	1.88885	0.20531	4.63905	0.20393	-2.36127	0.20391	1.87051	0.20357	2.66754
0.20408	-0.54314	0.2041	4.32411	0.20413	1.88511	0.20547	4.65839	0.2041	-2.36107	0.20407	1.86881	0.20374	2.67012
0.20425	-0.54676	0.20427	4.32349	0.2043	1.88061	0.20564	4.67856	0.20426	-2.36079	0.20424	1.86575	0.2039	2.67517
0.20441	-0.55004	0.20443	4.3222	0.20446	1.87663	0.20581	4.70047	0.20443	-2.3603	0.2044	1.86189	0.20407	2.68206
0.20458	-0.55183	0.2046	4.31989	0.20463	1.87337	0.20597	4.72287	0.20459	-2.35975	0.20457	1.85613	0.20424	2.68981
0.20474	-0.55294	0.20476	4.31662	0.2048	1.87039	0.20614	4.74089	0.20476	-2.3592	0.20474	1.85013	0.2044	2.69801
0.20491	-0.55276	0.20493	4.31341	0.20496	1.86882	0.20631	4.74224	0.20493	-2.35866	0.2049	1.8445	0.20457	2.70541
0.20508	-0.55223	0.2051	4.31173	0.20513	1.86774	0.20647	4.74061	0.20509	-2.35871	0.20507	1.84021	0.20474	2.71205
0.20524	-0.55194	0.20526	4.31021	0.2053	1.86635	0.20664	4.73233	0.20526	-2.35917	0.20524	1.83666	0.2049	2.71804
0.20541	-0.55188	0.20543	4.30961	0.20546	1.86482	0.20681	4.72363	0.20543	-2.36014	0.2054	1.83454	0.20507	2.72358
0.20558	-0.55185	0.2056	4.30914	0.20563	1.86279	0.20697	4.71661	0.20559	-2.3614	0.20557	1.83237	0.20524	2.72913
0.20574	-0.55182	0.20576	4.30852	0.2058	1.85948	0.20714	4.71078	0.20576	-2.36254	0.20574	1.82992	0.2054	2.73617
0.20591	-0.55179	0.20593	4.30771	0.20596	1.85597	0.20731	4.70558	0.20593	-2.36215	0.2059	1.8273	0.20557	2.74441
0.20608	-0.55174	0.2061	4.30669	0.20613	1.85216	0.20747	4.7006	0.20609	-2.36135	0.20607	1.82569	0.20573	2.75286
0.20624	-0.55169	0.20626	4.30549	0.20629	1.84845	0.20764	4.69558	0.20626	-2.36054	0.20624	1.82452	0.2059	2.76125
0.20641	-0.54996	0.20643	4.3042	0.20646	1.84507	0.2078	4.67669	0.20643	-2.35969	0.2064	1.82361	0.20607	2.76898
0.20658	-0.54776	0.2066	4.30221	0.20663	1.84218	0.20797	4.65738	0.20659	-2.35937	0.20657	1.82461	0.20623	2.77523
0.20674	-0.54596	0.20676	4.29982	0.20679	1.83943	0.20814	4.62991	0.20676	-2.35967	0.20673	1.82559	0.2064	2.77992
0.20691	-0.54466	0.20693	4.29901	0.20696	1.83677	0.2083	4.60299	0.20693	-2.35965	0.2069	1.82576	0.20657	2.78354
0.20707	-0.54411	0.2071	4.29883	0.20713	1.83414	0.20847	4.56662	0.20709	-2.3591	0.20707	1.82589	0.20673	2.78667
0.20724	-0.5445	0.20726	4.29882	0.20729	1.83149	0.20864	4.51419	0.20726	-2.35846	0.20723	1.82561	0.2069	2.78859
0.20741	-0.54513	0.20743	4.29992	0.20746	1.82933	0.2088	4.46174	0.20742	-2.35673	0.2074	1.82475	0.20707	2.78946
0.20757	-0.54544	0.20759	4.30092	0.20763	1.82919	0.20897	4.40807	0.20759	-2.35457	0.20757	1.82441	0.20723	2.79
0.20774	-0.54568	0.20776	4.3011	0.20779	1.82934	0.20914	4.35365	0.20776	-2.35287	0.20773	1.82471	0.2074	2.79039
0.20791	-0.54503	0.20793	4.30119	0.20796	1.82994	0.2093	4.28378	0.20792	-2.35126	0.2079	1.82501	0.20757	2.79089
0.20807	-0.54396	0.20809	4.30121	0.20813	1.83124	0.20947	4.20648	0.20809	-2.34978	0.20807	1.82508	0.20773	2.79175
0.20824	-0.5423	0.20826	4.30105	0.20829	1.83305	0.20964	4.12901	0.20826	-2.34864	0.20823	1.82507	0.2079	2.79161
0.20841	-0.53832	0.20843	4.30171	0.20846	1.83552	0.2098	4.05164	0.20842	-2.34761	0.2084	1.82604	0.20806	2.78888
0.20857	-0.53413	0.20859	4.30302	0.20863	1.83807	0.20997	3.97408	0.20859	-2.34682	0.20857	1.8276	0.20823	2.785
0.20874	-0.53161	0.20876	4.30437	0.20879	1.84089	0.21014	3.89957	0.20876	-2.34606	0.20873	1.82931	0.2084	2.78007
0.20891	-0.52934	0.20893	4.30521	0.20896	1.84356	0.2103	3.83038	0.20892	-2.34534	0.2089	1.83147	0.20856	2.77434
0.20907	-0.52838	0.20909	4.3058	0.20913	1.84483	0.21047	3.77951	0.20909	-2.34465	0.20907	1.83443	0.20873	2.76916
0.20924	-0.52855	0.20926	4.3047	0.20929	1.84561	0.21063	3.72765	0.20926	-2.34332	0.20923	1.83715	0.2089	2.76463
0.20941	-0.52862	0.20943	4.3035	0.20946	1.84648	0.2108	3.67529	0.20942	-2.34162	0.2094	1.83873	0.20906	2.76039
0.20957	-0.52845	0.20959	4.30226	0.20962	1.84749	0.21097	3.61623	0.20959	-2.33985	0.20956	1.84034	0.20923	2.75552
0.20974	-0.52825	0.20976	4.30111	0.20979	1.84907	0.21113	3.55742	0.20976	-2.33883	0.20973	1.84121	0.2094	2.74992
0.2099	-0.52665	0.20992	4.30011	0.20996	1.85187	0.2113	3.49794	0.20992	-2.33808	0.2099	1.84092	0.20956	2.74262
0.21007	-0.5248	0.21009	4.29933	0.21012	1.85462	0.21147	3.43507	0.21009	-2.33906	0.21006	1.84071	0.20973	2.73458
0.21024	-0.52308	0.21026	4.29857	0.21029	1.85711	0.21163	3.36482	0.21025	-2.34021	0.21023	1.84078	0.2099	2.72661
0.2104	-0.52132	0.21042	4.29758	0.21046	1.85935	0.2118	3.29544	0.21042	-2.3413	0.2104	1.84092	0.21006	2.71897
0.21057	-0.51894	0.21059	4.29641	0.21062	1.8611	0.21197	3.23898	0.21059	-2.34224	0.21056	1.84076	0.21023	2.71228
0.21074	-0.51542	0.21076	4.29595	0.21079	1.86253	0.21213	3.18424	0.21075	-2.34256	0.21073	1.8404	0.21039	2.70691
0.2109	-0.51147	0.21092	4.29587	0.21096	1.86383	0.2123	3.11996	0.21092	-2.34228	0.2109	1.83825	0.21056	2.7023
0.21107	-0.50678	0.21109	4.29581	0.21112	1.86478	0.21247	3.04973	0.21109	-2.34193	0.21106	1.83549	0.21073	2.69754
0.21124	-0.50214	0.21126	4.29682	0.21129	1.8657	0.21263	2.98956	0.21125	-2.34223	0.21123	1.83282	0.21089	2.69264
0.2114	-0.49803	0.21142	4.29787	0.21146	1.86664	0.2128	2.94332	0.21142	-2.343	0.2114	1.83151	0.21106	2.68918
0.21157	-0.49411	0.21159	4.29774	0.21162	1.86788	0.21297	2.89631	0.21159	-2.34503	0.21156	1.83073	0.21123	2.68664
0.21174	-0.49045	0.21176	4.29759	0.21179	1.87039	0.21313	2.85991	0.21175	-2.34731	0.21173	1.83065	0.21139	2.68419
0.2119	-0.48688	0.21192	4.29767	0.21196	1.8744	0.2133	2.82624	0.21192	-2.34952	0.21189	1.8307	0.21156	2.68203
0.21207	-0.48305	0.21209	4.29834	0.21212	1.87793	0.21347	2.8091	0.21209	-2.35089	0.21206	1.83081	0.21173	2.67981
0.21223	-0.47812	0.21225	4.29909	0.21229	1.88095	0.21363	2.79607	0.21225	-2.35189	0.21223	1.83103	0.21189	2.67713
0.2124	-0.47386	0.21242	4.30003	0.21246	1.88336	0.2138	2.77905	0.21242	-2.35261	0.21239	1.83147	0.21206	2.67441
0.21257	-0.47197	0.21259	4.30095	0.21262	1.88421	0.21396	2.75155	0.21258	-2.35328	0.21256	1.83203	0.21223	2.67179
0.21273	-0.47036	0.21275	4.30151	0.21279	1.88442	0.21413	2.72112	0.21275	-2.35346	0.21273	1.8326	0.21239	2.66937
0.2129	-0.46916	0.21292	4.30187	0.21295	1.88434	0.2143	2.68765	0.21292	-2.35285	0.21289	1.83199	0.21256	2.6681
0.21307	-0.46815	0.21309	4.30274	0.21312	1.88425	0.21446	2.65443	0.21308	-2.35218	0.21306	1.8307	0.21272	2.66769
0.21323	-0.46582	0.21325	4.30384	0.21329	1.88535	0.21463	2.62275	0.21325	-2.35146	0.21323	1.8281	0.21289	2.6675
0.2134	-0.46236	0.21342	4.30494	0.21345	1.88836	0.2148	2.59306	0.21342	-2.35075	0.21339	1.82534	0.21306	2.66919
0.21357	-0.45891	0.21359	4.30471	0.21362	1.89131	0.21496	2.56727	0.21358	-2.35041	0.21356	1.82258	0.21322	2.67183
0.21373	-0.45701	0.21375	4.30447	0.21379	1.89407	0.21513	2.54343	0.21375	-2.35021	0.21373	1.81995	0.21339	2.67517
0.2139	-0.4553	0.21392	4.30417	0.21395	1.89634	0.2153	2.51966	0.21392	-2.34923	0.21389	1.8182	0.21356	2.67877
0.21407	-0.45507	0.21409	4.30389	0.21412	1.89699	0.21546	2.48286	0.21408	-2.3482	0.21406	1.81771	0.21372	2.68252
0.21423	-0.45494	0.21425	4.3037	0.21429	1.89664	0.21563	2.44883	0.21425	-2.34717	0.21422	1.81739	0.21389	2.68645
0.2144	-0.45434	0.21442	4.30365	0.21445	1.89651	0.2158	2.42146	0.21442	-2.34634	0.21439	1.81666	0.21406	2.69012
0.21456	-0.45294	0.21458	4.3038	0.21462	1.89652	0.21596	2.39541	0.21458	-2.3456	0.21456	1.81546	0.21422	2.69354
0.21473	-0.45224	0.21475	4.30416	0.21479	1.89628	0.21613	2.36539	0.21475	-2.34503	0.21472	1.81454	0.21439	2.69698
0.2149	-0.4526	0.21492	4.30443	0.21495	1.89556	0.2163	2.32902	0.21492	-2.3445	0.21489	1.81379	0.21456	2.70137
0.21506	-0.45299	0.21508	4.30285	0.21512	1.89495	0.21646	2.30088	0.21508	-2.34396	0.21506	1.81304	0.21472	2.70647
0.21523	-0.45487	0.21525	4.30067	0.21529	1.89467	0.21663	2.27978	0.21525	-2.34334	0.21522	1.81235	0.21489	2.71175
0.2154	-0.45734	0.21542	4.29751	0.21545	1.89462	0.2168	2.25897	0.21541	-2.34208	0.21539	1.81151	0.21505	2.71721
0.21556	-0.45943	0.21558	4.29403	0.21562	1.89546	0.21696	2.23486	0.21558	-2.34036	0.21556	1.80925	0.21522	2.72261
0.21573	-0.46122	0.21575	4.29128	0.21578	1.89675	0.21713	2.20947	0.21575	-2.33855	0.21572	1.80683	0.21539	2.72734
0.2159	-0.46316	0.21592	4.29	0.21595	1.89662	0.21729	2.17378	0.21591	-2.33851	0.21589	1.80422	0.21555	2.73192
0.21606	-0.46663	0.21608	4.28846	0.21612	1.89508	0.21746	2.13669	0.21608	-2.33847	0.21606	1.80104	0.21572	2.73635
0.21623	-0.47035	0.21625	4.28629	0.21628	1.89285	0.21763	2.09644	0.21625	-2.33951	0.21622	1.79786	0.21589	2.74058
0.2164	-0.47534	0.21642	4.28414	0.21645	1.88921	0.21779	2.05143	0.21641	-2.34057	0.21639	1.79452	0.21605	2.7439
0.21656	-0.48041	0.21658	4.28211	0.21662	1.88583	0.21796	2.01091	0.21658	-2.34075	0.21655	1.79115	0.21622	2.74639
0.21673	-0.48417	0.21675	4.28008	0.21678	1.88392	0.21813	1.9809	0.21675	-2.33969	0.21672	1.78821	0.21639	2.7485
0.2169	-0.48622	0.21692	4.2784	0.21695	1.88249	0.21829	1.95055	0.21691	-2.33911	0.21689	1.78546	0.21655	2.75041
0.21706	-0.48794	0.21708	4.277	0.21712	1.88138	0.21846	1.91723	0.21708	-2.33933	0.21705	1.78407	0.21672	2.75222
0.21723	-0.4893	0.21725	4.27548	0.21728	1.88062	0.21863	1.88076	0.21725	-2.33959	0.21722	1.78327	0.21689	2.75475
0.21739	-0.49072	0.21741	4.27326	0.21745	1.8785	0.21879	1.8423	0.21741	-2.34046	0.21739	1.78246	0.21705	2.75746
0.21756	-0.49401	0.21758	4.2712	0.21762	1.87459	0.21896	1.80379	0.21758	-2.34146	0.21755	1.78111	0.21722	2.75822
0.21773	-0.49792	0.21775	4.27034	0.21778	1.87044	0.21913	1.76715	0.21774	-2.34208	0.21772	1.77968	0.21738	2.75827
0.21789	-0.50014	0.21791	4.26947	0.21795	1.86528	0.21929	1.74014	0.21791	-2.34261	0.21789	1.77811	0.21755	2.75796
0.21806	-0.50221	0.21808	4.26851	0.21812	1.85998	0.21946	1.71561	0.21808	-2.34335	0.21805	1.77647	0.21772	2.75702
0.21823	-0.50436	0.21825	4.26732	0.21828	1.85639	0.21963	1.70179	0.21824	-2.34492	0.21822	1.77575	0.21788	2.75579
0.21839	-0.50686	0.21841	4.26613	0.21845	1.85371	0.21979	1.68668	0.21841	-2.34633	0.21839	1.77598	0.21805	2.75449
0.21856	-0.50982	0.21858	4.26481	0.21862	1.85195	0.21996	1.66455	0.21858	-2.34764	0.21855	1.77671	0.21822	2.75315
0.21873	-0.51353	0.21875	4.26345	0.21878	1.85181	0.22013	1.63591	0.21874	-2.34902	0.21872	1.77787	0.21838	2.75247
0.21889	-0.51724	0.21891	4.26213	0.21895	1.85247	0.22029	1.61047	0.21891	-2.3512	0.21888	1.77904	0.21855	2.75215
0.21906	-0.52045	0.21908	4.26108	0.21911	1.8536	0.22046	1.59089	0.21908	-2.35377	0.21905	1.78016	0.21872	2.75079
0.21923	-0.52341	0.21925	4.26183	0.21928	1.85468	0.22062	1.57109	0.21924	-2.35644	0.21922	1.78125	0.21888	2.74881
0.21939	-0.52499	0.21941	4.26293	0.21945	1.85493	0.22079	1.55311	0.21941	-2.35895	0.21938	1.78235	0.21905	2.74664
0.21956	-0.52586	0.21958	4.26363	0.21961	1.85405	0.22096	1.53665	0.21958	-2.36148	0.21955	1.78337	0.21922	2.74401
0.21972	-0.52674	0.21974	4.26324	0.21978	1.85226	0.22112	1.52335	0.21974	-2.36108	0.21972	1.78389	0.21938	2.7415
0.21989	-0.52767	0.21991	4.26226	0.21995	1.84974	0.22129	1.50954	0.21991	-2.36056	0.21988	1.78306	0.21955	2.73947
0.22006	-0.52833	0.22008	4.25984	0.22011	1.84722	0.22146	1.49314	0.22008	-2.35848	0.22005	1.78248	0.21971	2.73755
0.22022	-0.52758	0.22024	4.25755	0.22028	1.84467	0.22162	1.47267	0.22024	-2.35634	0.22022	1.78241	0.21988	2.73603
0.22039	-0.52685	0.22041	4.25596	0.22045	1.84301	0.22179	1.45446	0.22041	-2.35445	0.22038	1.78234	0.22005	2.73481
0.22056	-0.52599	0.22058	4.25542	0.22061	1.84269	0.22196	1.44077	0.22057	-2.35299	0.22055	1.78315	0.22021	2.73459
0.22072	-0.52519	0.22074	4.25483	0.22078	1.84277	0.22212	1.42624	0.22074	-2.35242	0.22072	1.78433	0.22038	2.73528
0.22089	-0.52555	0.22091	4.25419	0.22095	1.84361	0.22229	1.40546	0.22091	-2.35301	0.22088	1.78514	0.22055	2.7361
0.22106	-0.52753	0.22108	4.25357	0.22111	1.84529	0.22246	1.38189	0.22107	-2.3537	0.22105	1.78569	0.22071	2.74023
0.22122	-0.52954	0.22124	4.25312	0.22128	1.84666	0.22262	1.36106	0.22124	-2.35514	0.22121	1.78627	0.22088	2.74526
0.22139	-0.53194	0.22141	4.25286	0.22145	1.84768	0.22279	1.34277	0.22141	-2.35677	0.22138	1.78971	0.22105	2.74937
0.22156	-0.53427	0.22158	4.25323	0.22161	1.8483	0.22296	1.32727	0.22157	-2.35779	0.22155	1.79319	0.22121	2.75332
0.22172	-0.53473	0.22174	4.25363	0.22178	1.8477	0.22312	1.32245	0.22174	-2.35868	0.22171	1.79721	0.22138	2.75728
0.22189	-0.53471	0.22191	4.25401	0.22195	1.84663	0.22329	1.31419	0.22191	-2.35973	0.22188	1.80133	0.22155	2.76108
0.22205	-0.53438	0.22207	4.25452	0.22211	1.84655	0.22346	1.29741	0.22207	-2.36131	0.22205	1.8054	0.22171	2.76526
0.22222	-0.53318	0.22224	4.2551	0.22228	1.84711	0.22362	1.28088	0.22224	-2.36274	0.22221	1.80931	0.22188	2.76983
0.22239	-0.53193	0.22241	4.25584	0.22244	1.84836	0.22379	1.26767	0.22241	-2.36343	0.22238	1.81244	0.22204	2.77475
0.22255	-0.53038	0.22257	4.25629	0.22261	1.85057	0.22395	1.25933	0.22257	-2.36408	0.22255	1.81455	0.22221	2.78018
0.22272	-0.52884	0.22274	4.25502	0.22278	1.85197	0.22412	1.25855	0.22274	-2.36447	0.22271	1.81664	0.22238	2.78593
0.22289	-0.52733	0.22291	4.25228	0.22294	1.85187	0.22429	1.26489	0.22291	-2.36452	0.22288	1.81827	0.22254	2.79101
0.22305	-0.52588	0.22307	4.24937	0.22311	1.85131	0.22445	1.27509	0.22307	-2.36381	0.22305	1.81968	0.22271	2.79596
0.22322	-0.5248	0.22324	4.24667	0.22328	1.85033	0.22462	1.2968	0.22324	-2.36269	0.22321	1.82116	0.22288	2.80055
0.22339	-0.52392	0.22341	4.24445	0.22344	1.84907	0.22479	1.31958	0.2234	-2.36133	0.22338	1.82264	0.22304	2.80493
0.22355	-0.52315	0.22357	4.24478	0.22361	1.84875	0.22495	1.34029	0.22357	-2.35919	0.22355	1.82412	0.22321	2.80939
0.22372	-0.52279	0.22374	4.24585	0.22378	1.84918	0.22512	1.36142	0.22374	-2.35718	0.22371	1.82569	0.22338	2.81448
0.22389	-0.52243	0.22391	4.24788	0.22394	1.85038	0.22529	1.3877	0.2239	-2.35787	0.22388	1.82787	0.22354	2.81935
0.22405	-0.52204	0.22407	4.24989	0.22411	1.85309	0.22545	1.42119	0.22407	-2.35845	0.22404	1.83119	0.22371	2.82506
0.22422	-0.52173	0.22424	4.2518	0.22428	1.85648	0.22562	1.45829	0.22424	-2.35851	0.22421	1.83466	0.22388	2.83166
0.22439	-0.52209	0.22441	4.25344	0.22444	1.85981	0.22579	1.49877	0.2244	-2.35757	0.22438	1.83734	0.22404	2.83802
0.22455	-0.52356	0.22457	4.25436	0.22461	1.86326	0.22595	1.53726	0.22457	-2.35639	0.22454	1.83933	0.22421	2.84409
0.22472	-0.52512	0.22474	4.25426	0.22478	1.86573	0.22612	1.56854	0.22474	-2.35496	0.22471	1.84048	0.22437	2.85014
0.22488	-0.52671	0.2249	4.25428	0.22494	1.86725	0.22629	1.59703	0.2249	-2.35357	0.22488	1.84125	0.22454	2.85773
0.22505	-0.52813	0.22507	4.25483	0.22511	1.86783	0.22645	1.63201	0.22507	-2.35264	0.22504	1.84197	0.22471	2.8665
0.22522	-0.52827	0.22524	4.25555	0.22528	1.86762	0.22662	1.66942	0.22524	-2.35171	0.22521	1.84194	0.22487	2.87111
0.22538	-0.52786	0.2254	4.25612	0.22544	1.86727	0.22679	1.71029	0.2254	-2.35002	0.22538	1.84161	0.22504	2.8754
0.22555	-0.52709	0.22557	4.25659	0.22561	1.86674	0.22695	1.76138	0.22557	-2.3482	0.22554	1.83873	0.22521	2.87997
0.22572	-0.52629	0.22574	4.25691	0.22577	1.86652	0.22712	1.80711	0.22573	-2.34685	0.22571	1.83573	0.22537	2.88489
0.22588	-0.52569	0.2259	4.25685	0.22594	1.86758	0.22728	1.84299	0.2259	-2.34675	0.22588	1.83368	0.22554	2.89014
0.22605	-0.5259	0.22607	4.25676	0.22611	1.86944	0.22745	1.87993	0.22607	-2.34645	0.22604	1.83327	0.22571	2.89544
0.22622	-0.52645	0.22624	4.25661	0.22627	1.87107	0.22762	1.91673	0.22623	-2.34554	0.22621	1.8329	0.22587	2.90075
0.22638	-0.52781	0.2264	4.25649	0.22644	1.87242	0.22778	1.95192	0.2264	-2.3444	0.22637	1.83253	0.22604	2.90595
0.22655	-0.52912	0.22657	4.25654	0.22661	1.87296	0.22795	1.98423	0.22657	-2.34194	0.22654	1.83213	0.22621	2.91077
0.22672	-0.52995	0.22674	4.25715	0.22677	1.87257	0.22812	2.01434	0.22673	-2.33863	0.22671	1.83137	0.22637	2.91479
0.22688	-0.53041	0.2269	4.25941	0.22694	1.8719	0.22828	2.04006	0.2269	-2.33532	0.22687	1.83045	0.22654	2.91875
0.22705	-0.5309	0.22707	4.26312	0.22711	1.87091	0.22845	2.05595	0.22707	-2.33243	0.22704	1.83001	0.2267	2.92259
0.22721	-0.53138	0.22723	4.26667	0.22727	1.86978	0.22862	2.06492	0.22723	-2.32976	0.22721	1.82976	0.22687	2.92917
0.22738	-0.53233	0.2274	4.27008	0.22744	1.86908	0.22878	2.06354	0.2274	-2.32809	0.22737	1.82944	0.22704	2.93577
0.22755	-0.53539	0.22757	4.2727	0.22761	1.86868	0.22895	2.05887	0.22757	-2.32681	0.22754	1.82856	0.2272	2.9432
0.22771	-0.53845	0.22773	4.27302	0.22777	1.86889	0.22912	2.04888	0.22773	-2.32642	0.22771	1.82766	0.22737	2.95046
0.22788	-0.54124	0.2279	4.27294	0.22794	1.87039	0.22928	2.03126	0.2279	-2.32612	0.22787	1.82669	0.22754	2.95661
0.22805	-0.54389	0.22807	4.27202	0.22811	1.87153	0.22945	2.00836	0.22807	-2.32582	0.22804	1.82575	0.2277	2.96218
0.22821	-0.54622	0.22823	4.27014	0.22827	1.87118	0.22962	1.98005	0.22823	-2.3256	0.22821	1.82467	0.22787	2.96693
0.22838	-0.54789	0.2284	4.2684	0.22844	1.87025	0.22978	1.95025	0.2284	-2.32598	0.22837	1.82354	0.22804	2.97067
0.22855	-0.549	0.22857	4.26675	0.22861	1.86755	0.22995	1.91756	0.22856	-2.32724	0.22854	1.82307	0.2282	2.97453
0.22871	-0.54898	0.22873	4.26495	0.22877	1.86331	0.23011	1.887	0.22873	-2.3284	0.2287	1.82319	0.22837	2.97021
0.22888	-0.54896	0.2289	4.26274	0.22894	1.85995	0.23028	1.8633	0.2289	-2.32943	0.22887	1.82317	0.22854	2.96337
0.22905	-0.54733	0.22907	4.26014	0.2291	1.85732	0.23045	1.84328	0.22906	-2.3303	0.22904	1.82238	0.2287	2.95468
0.22921	-0.54487	0.22923	4.25712	0.22927	1.85482	0.23061	1.8185	0.22923	-2.33073	0.2292	1.8215	0.22887	2.94543
0.22938	-0.54292	0.2294	4.25394	0.22944	1.85273	0.23078	1.78691	0.2294	-2.33101	0.22937	1.82132	0.22903	2.93529
0.22954	-0.5417	0.22956	4.25147	0.2296	1.85096	0.23095	1.75045	0.22956	-2.33114	0.22954	1.82122	0.2292	2.9217
0.22971	-0.5408	0.22973	4.25028	0.22977	1.84935	0.23111	1.70509	0.22973	-2.33081	0.2297	1.8212	0.22937	2.90835
0.22988	-0.54024	0.2299	4.24924	0.22994	1.8478	0.23128	1.65979	0.2299	-2.32993	0.22987	1.82125	0.22953	2.89446
0.23004	-0.54089	0.23006	4.24856	0.2301	1.84695	0.23145	1.61364	0.23006	-2.32792	0.23004	1.82034	0.2297	2.87951
0.23021	-0.54146	0.23023	4.24753	0.23027	1.84686	0.23161	1.56441	0.23023	-2.3258	0.2302	1.81803	0.22987	2.86444
0.23038	-0.54121	0.2304	4.24527	0.23044	1.84724	0.23178	1.514	0.2304	-2.32354	0.23037	1.81578	0.23003	2.84665
0.23054	-0.54094	0.23056	4.24212	0.2306	1.8479	0.23195	1.46478	0.23056	-2.32159	0.23054	1.81496	0.2302	2.82966
0.23071	-0.54153	0.23073	4.23888	0.23077	1.84858	0.23211	1.41446	0.23073	-2.32084	0.2307	1.81502	0.23037	2.81283
0.23088	-0.5431	0.2309	4.2356	0.23094	1.84869	0.23228	1.36406	0.2309	-2.32108	0.23087	1.81544	0.23053	2.79591
0.23104	-0.54524	0.23106	4.23259	0.2311	1.84853	0.23245	1.31701	0.23106	-2.32177	0.23103	1.81606	0.2307	2.7775
0.23121	-0.54777	0.23123	4.23052	0.23127	1.84872	0.23261	1.279	0.23123	-2.32404	0.2312	1.81639	0.23087	2.75743
0.23138	-0.55042	0.2314	4.22866	0.23144	1.84911	0.23278	1.24393	0.23139	-2.32643	0.23137	1.81536	0.23103	2.73576
0.23154	-0.55127	0.23156	4.22691	0.2316	1.84937	0.23295	1.21051	0.23156	-2.32779	0.23153	1.81441	0.2312	2.71326
0.23171	-0.55115	0.23173	4.22506	0.23177	1.84933	0.23311	1.18224	0.23173	-2.32893	0.2317	1.81402	0.23136	2.69087
0.23188	-0.5487	0.23189	4.22266	0.23194	1.84853	0.23328	1.15941	0.23189	-2.32932	0.23187	1.81375	0.23153	2.66726
0.23204	-0.54577	0.23206	4.2199	0.2321	1.8464	0.23344	1.14223	0.23206	-2.32859	0.23203	1.8142	0.2317	2.64425
0.23221	-0.54289	0.23223	4.21809	0.23227	1.84377	0.23361	1.12297	0.23223	-2.32786	0.2322	1.81543	0.23186	2.62217
0.23237	-0.54065	0.23239	4.21713	0.23243	1.84082	0.23378	1.10004	0.23239	-2.32713	0.23237	1.81683	0.23203	2.60066
0.23254	-0.53874	0.23256	4.21593	0.2326	1.83757	0.23394	1.07686	0.23256	-2.32655	0.23253	1.8184	0.2322	2.57887
0.23271	-0.53743	0.23273	4.2141	0.23277	1.83631	0.23411	1.05523	0.23273	-2.32633	0.2327	1.82003	0.23236	2.5564
0.23287	-0.53618	0.23289	4.21231	0.23293	1.83641	0.23428	1.03507	0.23289	-2.32635	0.23287	1.82215	0.23253	2.54271
0.23304	-0.53496	0.23306	4.21089	0.2331	1.83665	0.23444	1.0169	0.23306	-2.32654	0.23303	1.82455	0.2327	2.53066
0.23321	-0.53375	0.23323	4.20961	0.23327	1.83658	0.23461	1.0005	0.23323	-2.32678	0.2332	1.82771	0.23286	2.51919
0.23337	-0.53448	0.23339	4.20837	0.23343	1.83631	0.23478	0.98947	0.23339	-2.32719	0.23336	1.83105	0.23303	2.5066
0.23354	-0.53622	0.23356	4.20708	0.2336	1.83558	0.23494	0.98477	0.23356	-2.32793	0.23353	1.83434	0.2332	2.49564
0.23371	-0.53809	0.23373	4.20494	0.23377	1.83474	0.23511	0.97963	0.23372	-2.32884	0.2337	1.83758	0.23336	2.48782
0.23387	-0.53908	0.23389	4.20168	0.23393	1.83357	0.23528	0.97315	0.23389	-2.33017	0.23386	1.84081	0.23353	2.47968
0.23404	-0.53968	0.23406	4.19878	0.2341	1.83198	0.23544	0.96664	0.23406	-2.33152	0.23403	1.84379	0.23369	2.47104
0.23421	-0.53874	0.23423	4.19661	0.23427	1.8295	0.23561	0.96215	0.23422	-2.33303	0.2342	1.84624	0.23386	2.46201
0.23437	-0.53767	0.23439	4.1954	0.23443	1.82631	0.23578	0.95886	0.23439	-2.33468	0.23436	1.84634	0.23403	2.45415
0.23454	-0.53667	0.23456	4.19535	0.2346	1.82298	0.23594	0.95667	0.23456	-2.33647	0.23453	1.84486	0.23419	2.44812
0.2347	-0.53589	0.23472	4.19601	0.23477	1.82074	0.23611	0.95583	0.23472	-2.33843	0.2347	1.84204	0.23436	2.44199
0.23487	-0.53421	0.23489	4.19578	0.23493	1.81908	0.23628	0.95611	0.23489	-2.34011	0.23486	1.8384	0.23453	2.43517
0.23504	-0.53148	0.23506	4.19409	0.2351	1.81811	0.23644	0.95752	0.23506	-2.34124	0.23503	1.83554	0.23469	2.42855
0.2352	-0.5287	0.23522	4.19177	0.23526	1.81733	0.23661	0.95931	0.23522	-2.34142	0.2352	1.83516	0.23486	2.42377
0.23537	-0.5258	0.23539	4.18868	0.23543	1.81651	0.23677	0.96164	0.23539	-2.34022	0.23536	1.83521	0.23503	2.41903
0.23554	-0.52272	0.23556	4.18569	0.2356	1.81552	0.23694	0.96381	0.23556	-2.33869	0.23553	1.83649	0.23519	2.41402
0.2357	-0.52158	0.23572	4.18356	0.23576	1.81459	0.23711	0.96279	0.23572	-2.33688	0.23569	1.83772	0.23536	2.40833
0.23587	-0.52131	0.23589	4.18228	0.23593	1.81396	0.23727	0.95968	0.23589	-2.33477	0.23586	1.83861	0.23553	2.40319
0.23604	-0.52109	0.23606	4.18158	0.2361	1.81341	0.23744	0.95732	0.23606	-2.3335	0.23603	1.83902	0.23569	2.39921
0.2362	-0.52127	0.23622	4.18137	0.23626	1.81373	0.23761	0.95609	0.23622	-2.33326	0.23619	1.83868	0.23586	2.39519
0.23637	-0.52139	0.23639	4.18139	0.23643	1.81487	0.23777	0.95786	0.23639	-2.33306	0.23636	1.83765	0.23602	2.39104
0.23654	-0.5208	0.23656	4.18183	0.2366	1.81672	0.23794	0.96327	0.23655	-2.33302	0.23653	1.83681	0.23619	2.38667
0.2367	-0.52018	0.23672	4.18274	0.23676	1.81864	0.23811	0.97038	0.23672	-2.33291	0.23669	1.83662	0.23636	2.38253
0.23687	-0.51913	0.23689	4.18419	0.23693	1.82064	0.23827	0.97947	0.23689	-2.33245	0.23686	1.83643	0.23652	2.37836
0.23703	-0.51741	0.23705	4.18571	0.2371	1.8249	0.23844	0.99036	0.23705	-2.33184	0.23703	1.83577	0.23669	2.37414
0.2372	-0.51565	0.23722	4.18638	0.23726	1.8296	0.23861	0.99913	0.23722	-2.33117	0.23719	1.83492	0.23686	2.3675
0.23737	-0.51387	0.23739	4.18609	0.23743	1.8347	0.23877	1.00645	0.23739	-2.33039	0.23736	1.83357	0.23702	2.3609
0.23753	-0.51208	0.23755	4.18579	0.2376	1.83993	0.23894	1.01344	0.23755	-2.32943	0.23753	1.8315	0.23719	2.35475
0.2377	-0.51017	0.23772	4.18549	0.23776	1.84424	0.23911	1.01924	0.23772	-2.32816	0.23769	1.82953	0.23736	2.3486
0.23787	-0.50818	0.23789	4.18525	0.23793	1.84722	0.23927	1.02521	0.23789	-2.32705	0.23786	1.82759	0.23752	2.34295
0.23803	-0.50708	0.23805	4.18512	0.2381	1.85045	0.23944	1.03252	0.23805	-2.3266	0.23802	1.82556	0.23769	2.33815
0.2382	-0.50619	0.23822	4.18472	0.23826	1.85398	0.23961	1.04058	0.23822	-2.32666	0.23819	1.82341	0.23786	2.33392
0.23837	-0.50536	0.23839	4.18352	0.23843	1.85753	0.23977	1.05431	0.23839	-2.32657	0.23836	1.822	0.23802	2.33034
0.23853	-0.50503	0.23855	4.18194	0.23859	1.8605	0.23994	1.07339	0.23855	-2.32635	0.23852	1.82283	0.23819	2.32665
0.2387	-0.50463	0.23872	4.18064	0.23876	1.86328	0.2401	1.09242	0.23872	-2.32607	0.23869	1.82486	0.23835	2.32246
0.23887	-0.50399	0.23889	4.17969	0.23893	1.86465	0.24027	1.11053	0.23888	-2.32568	0.23886	1.82715	0.23852	2.31821
0.23903	-0.50336	0.23905	4.1799	0.23909	1.86561	0.24044	1.12762	0.23905	-2.32559	0.23902	1.82995	0.23869	2.31461
0.2392	-0.50336	0.23922	4.18133	0.23926	1.86627	0.2406	1.14211	0.23922	-2.32604	0.23919	1.8317	0.23885	2.31114
0.23937	-0.504	0.23938	4.18291	0.23943	1.86576	0.24077	1.15545	0.23938	-2.32667	0.23936	1.83128	0.23902	2.30852
0.23953	-0.50483	0.23955	4.18459	0.23959	1.86513	0.24094	1.16865	0.23955	-2.32735	0.23952	1.83061	0.23919	2.30775
0.2397	-0.50577	0.23972	4.18606	0.23976	1.86469	0.2411	1.18115	0.23972	-2.32812	0.23969	1.82899	0.23935	2.30737
0.23986	-0.50664	0.23988	4.18663	0.23993	1.86429	0.24127	1.1941	0.23988	-2.32921	0.23986	1.82664	0.23952	2.30761
0.24003	-0.5058	0.24005	4.18659	0.24009	1.8645	0.24144	1.20796	0.24005	-2.33064	0.24002	1.82458	0.23969	2.30806
0.2402	-0.50476	0.24022	4.18694	0.24026	1.86519	0.2416	1.22091	0.24022	-2.33241	0.24019	1.82288	0.23985	2.3099
0.24036	-0.50334	0.24038	4.18787	0.24043	1.86498	0.24177	1.23285	0.24038	-2.33496	0.24036	1.82136	0.24002	2.31247
0.24053	-0.50195	0.24055	4.18867	0.24059	1.86398	0.24194	1.24436	0.24055	-2.33789	0.24052	1.82049	0.24019	2.31526
0.2407	-0.50127	0.24072	4.18907	0.24076	1.86287	0.2421	1.25455	0.24072	-2.3407	0.24069	1.81948	0.24035	2.31811
0.24086	-0.50213	0.24088	4.18935	0.24093	1.86222	0.24227	1.26408	0.24088	-2.34341	0.24085	1.81786	0.24052	2.32087
0.24103	-0.50349	0.24105	4.18957	0.24109	1.86165	0.24244	1.27112	0.24105	-2.3453	0.24102	1.81607	0.24068	2.32559
0.2412	-0.50541	0.24122	4.18977	0.24126	1.85884	0.2426	1.27675	0.24122	-2.34623	0.24119	1.81373	0.24085	2.33092
0.24136	-0.50738	0.24138	4.19044	0.24143	1.85555	0.24277	1.28453	0.24138	-2.34713	0.24135	1.81071	0.24102	2.33735
0.24153	-0.50946	0.24155	4.19223	0.24159	1.85277	0.24294	1.29819	0.24155	-2.34813	0.24152	1.80828	0.24118	2.34504
0.2417	-0.51165	0.24171	4.19409	0.24176	1.85074	0.2431	1.31478	0.24171	-2.34926	0.24169	1.80657	0.24135	2.35262
0.24186	-0.51391	0.24188	4.19382	0.24192	1.84964	0.24327	1.3328	0.24188	-2.351	0.24185	1.80497	0.24152	2.36001
0.24203	-0.51629	0.24205	4.19172	0.24209	1.84996	0.24343	1.35115	0.24205	-2.35306	0.24202	1.80371	0.24168	2.36674
0.24219	-0.51901	0.24221	4.18909	0.24226	1.8504	0.2436	1.36234	0.24221	-2.35451	0.24219	1.80268	0.24185	2.37334
0.24236	-0.52374	0.24238	4.18632	0.24242	1.85042	0.24377	1.36623	0.24238	-2.35546	0.24235	1.80175	0.24202	2.37925
0.24253	-0.52822	0.24255	4.18344	0.24259	1.85027	0.24393	1.3621	0.24255	-2.35562	0.24252	1.80089	0.24218	2.38528
0.24269	-0.53235	0.24271	4.18135	0.24276	1.8508	0.2441	1.35295	0.24271	-2.35447	0.24269	1.80001	0.24235	2.39175
0.24286	-0.53638	0.24288	4.18103	0.24292	1.85153	0.24427	1.34356	0.24288	-2.35285	0.24285	1.79908	0.24252	2.39832
0.24303	-0.53968	0.24305	4.18079	0.24309	1.8521	0.24443	1.33669	0.24305	-2.35132	0.24302	1.79785	0.24268	2.40543
0.24319	-0.54229	0.24321	4.18006	0.24326	1.8518	0.2446	1.33126	0.24321	-2.34985	0.24318	1.79615	0.24285	2.41281
0.24336	-0.54429	0.24338	4.17937	0.24342	1.85173	0.24477	1.32827	0.24338	-2.34902	0.24335	1.79449	0.24301	2.42044
0.24353	-0.54567	0.24355	4.17936	0.24359	1.85292	0.24493	1.32618	0.24355	-2.34885	0.24352	1.79286	0.24318	2.42881
0.24369	-0.54704	0.24371	4.18041	0.24376	1.85416	0.2451	1.32543	0.24371	-2.34863	0.24368	1.79148	0.24335	2.43676
0.24386	-0.54807	0.24388	4.18141	0.24392	1.85561	0.24527	1.32673	0.24388	-2.34835	0.24385	1.79113	0.24351	2.44279
0.24403	-0.54922	0.24405	4.18231	0.24409	1.85729	0.24543	1.32806	0.24405	-2.34818	0.24402	1.7915	0.24368	2.44864
0.24419	-0.55204	0.24421	4.18303	0.24426	1.85833	0.2456	1.32875	0.24421	-2.34827	0.24418	1.79267	0.24385	2.45425
0.24436	-0.55494	0.24438	4.1829	0.24442	1.85884	0.24577	1.32928	0.24438	-2.34809	0.24435	1.79518	0.24401	2.4596
0.24452	-0.558	0.24454	4.18231	0.24459	1.85934	0.24593	1.32961	0.24454	-2.34714	0.24452	1.79766	0.24418	2.4637
0.24469	-0.56109	0.24471	4.18099	0.24476	1.86012	0.2461	1.32982	0.24471	-2.34583	0.24468	1.79958	0.24435	2.46672
0.24486	-0.56336	0.24488	4.17937	0.24492	1.86089	0.24627	1.33142	0.24488	-2.34455	0.24485	1.80125	0.24451	2.46961
0.24502	-0.56424	0.24504	4.17732	0.24509	1.86113	0.24643	1.33378	0.24504	-2.34333	0.24502	1.80213	0.24468	2.47439
0.24519	-0.56513	0.24521	4.17393	0.24525	1.86134	0.2466	1.33779	0.24521	-2.34302	0.24518	1.80232	0.24485	2.47936
0.24536	-0.56616	0.24538	4.17059	0.24542	1.86103	0.24676	1.3463	0.24538	-2.34358	0.24535	1.80313	0.24501	2.48173
0.24552	-0.56724	0.24554	4.16735	0.24559	1.85993	0.24693	1.35408	0.24554	-2.34429	0.24551	1.80452	0.24518	2.4837
0.24569	-0.56818	0.24571	4.16414	0.24575	1.85824	0.2471	1.35531	0.24571	-2.34571	0.24568	1.80546	0.24534	2.48698
0.24586	-0.56907	0.24588	4.16089	0.24592	1.85588	0.24726	1.3545	0.24588	-2.34755	0.24585	1.80555	0.24551	2.49239
0.24602	-0.56968	0.24604	4.15825	0.24609	1.85351	0.24743	1.35096	0.24604	-2.34884	0.24601	1.80508	0.24568	2.49855
0.24619	-0.5693	0.24621	4.15811	0.24625	1.85218	0.2476	1.34512	0.24621	-2.34955	0.24618	1.80424	0.24584	2.50542
0.24636	-0.56843	0.24638	4.15989	0.24642	1.85121	0.24776	1.34702	0.24638	-2.3503	0.24635	1.80326	0.24601	2.51245
0.24652	-0.56581	0.24654	4.16174	0.24659	1.85071	0.24793	1.35568	0.24654	-2.35124	0.24651	1.80192	0.24618	2.51822
0.24669	-0.56345	0.24671	4.16373	0.24675	1.85035	0.2481	1.36515	0.24671	-2.35243	0.24668	1.80006	0.24634	2.52343
0.24686	-0.56303	0.24687	4.16507	0.24692	1.84998	0.24826	1.37279	0.24687	-2.35491	0.24685	1.79821	0.24651	2.52838
0.24702	-0.56432	0.24704	4.16426	0.24709	1.84961	0.24843	1.37931	0.24704	-2.35818	0.24701	1.7964	0.24668	2.53321
0.24719	-0.56637	0.24721	4.16318	0.24725	1.84949	0.2486	1.38329	0.24721	-2.36168	0.24718	1.79494	0.24684	2.53805
0.24735	-0.56899	0.24737	4.16184	0.24742	1.85024	0.24876	1.38627	0.24737	-2.3645	0.24735	1.79452	0.24701	2.54316
0.24752	-0.57121	0.24754	4.16004	0.24759	1.851	0.24893	1.38991	0.24754	-2.36666	0.24751	1.7948	0.24718	2.54804
0.24769	-0.57159	0.24771	4.15751	0.24775	1.8501	0.2491	1.39432	0.24771	-2.36832	0.24768	1.79506	0.24734	2.5522
0.24785	-0.57182	0.24787	4.15398	0.24792	1.84822	0.24926	1.39718	0.24787	-2.36919	0.24784	1.7953	0.24751	2.55622
0.24802	-0.57239	0.24804	4.15132	0.24809	1.84605	0.24943	1.39811	0.24804	-2.37018	0.24801	1.79556	0.24767	2.56123
0.24819	-0.57282	0.24821	4.15131	0.24825	1.84369	0.2496	1.39861	0.24821	-2.37173	0.24818	1.79585	0.24784	2.56711
0.24835	-0.57228	0.24837	4.15253	0.24842	1.84139	0.24976	1.40149	0.24837	-2.37408	0.24834	1.79524	0.24801	2.57315
0.24852	-0.57025	0.24854	4.15456	0.24858	1.84138	0.24993	1.40528	0.24854	-2.37619	0.24851	1.7933	0.24817	2.57933
0.24869	-0.56808	0.24871	4.15691	0.24875	1.84137	0.25009	1.40927	0.24871	-2.37804	0.24868	1.79112	0.24834	2.58554
0.24885	-0.56585	0.24887	4.1588	0.24892	1.84108	0.25026	1.41343	0.24887	-2.38007	0.24884	1.78849	0.24851	2.5914
0.24902	-0.56387	0.24904	4.15965	0.24908	1.84077	0.25043	1.41426	0.24904	-2.38256	0.24901	1.78555	0.24867	2.59726
0.24919	-0.56329	0.2492	4.16108	0.24925	1.84012	0.25059	1.40628	0.24921	-2.38524	0.24918	1.78336	0.24884	2.60097
0.24935	-0.5632	0.24937	4.16367	0.24942	1.83901	0.25076	1.39459	0.24937	-2.38782	0.24934	1.7819	0.24901	2.6047
0.24952	-0.56299	0.24954	4.16633	0.24958	1.83845	0.25093	1.37793	0.24954	-2.39038	0.24951	1.78082	0.24917	2.6078
0.24968	-0.56275	0.2497	4.16926	0.24975	1.83869	0.25109	1.36071	0.2497	-2.39254	0.24968	1.78042	0.24934	2.60998
0.24985	-0.56294	0.24987	4.17242	0.24992	1.83888	0.25126	1.34624	0.24987	-2.3938	0.24984	1.78086	0.24951	2.61073
0.25002	-0.56427	0.25004	4.17556	0.25008	1.83841	0.25143	1.33371	0.25004	-2.39461	0.25001	1.78216	0.24967	2.60929
0.25018	-0.56593	0.2502	4.17869	0.25025	1.83771	0.25159	1.32463	0.2502	-2.39445	0.25017	1.7838	0.24984	2.60776
0.25035	-0.56846	0.25037	4.18193	0.25042	1.83593	0.25176	1.3176	0.25037	-2.39428	0.25034	1.78457	0.25	2.60853
0.25052	-0.57063	0.25054	4.18546	0.25058	1.8339	0.25193	1.31168	0.25054	-2.39407	0.25051	1.78446	0.25017	2.60994
0.25068	-0.57109	0.2507	4.18891	0.25075	1.83254	0.25209	1.3099	0.2507	-2.39376	0.25067	1.78472	0.25034	2.61272
0.25085	-0.56981	0.25087	4.19224	0.25092	1.83512	0.25226	1.30957	0.25087	-2.39315	0.25084	1.7854	0.2505	2.61599
0.25102	-0.56662	0.25104	4.19557	0.25108	1.83765	0.25243	1.31075	0.25104	-2.39232	0.25101	1.78628	0.25067	2.61862
0.25118	-0.56188	0.2512	4.19883	0.25125	1.84017	0.25259	1.31278	0.2512	-2.39151	0.25117	1.78777	0.25084	2.61913
0.25135	-0.55743	0.25137	4.2021	0.25141	1.84254	0.25276	1.31501	0.25137	-2.39073	0.25134	1.78923	0.251	2.61953
0.25152	-0.55354	0.25153	4.20562	0.25158	1.84335	0.25292	1.31765	0.25154	-2.39039	0.25151	1.78963	0.25117	2.6197
0.25168	-0.5503	0.2517	4.20945	0.25175	1.8429	0.25309	1.32057	0.2517	-2.39121	0.25167	1.78943	0.25134	2.61986
0.25185	-0.54874	0.25187	4.21269	0.25191	1.84409	0.25326	1.32291	0.25187	-2.39214	0.25184	1.78886	0.2515	2.61905
0.25201	-0.54736	0.25203	4.2145	0.25208	1.84622	0.25342	1.32475	0.25203	-2.39295	0.25201	1.78784	0.25167	2.61765
0.25218	-0.54597	0.2522	4.21451	0.25225	1.84819	0.25359	1.32654	0.2522	-2.39339	0.25217	1.78666	0.25184	2.61515
0.25235	-0.54467	0.25237	4.21201	0.25241	1.8494	0.25376	1.33527	0.25237	-2.39322	0.25234	1.78543	0.252	2.61186
0.25251	-0.54445	0.25253	4.20863	0.25258	1.85031	0.25392	1.34763	0.25253	-2.39233	0.2525	1.78428	0.25217	2.60868
0.25268	-0.54559	0.2527	4.20533	0.25275	1.84912	0.25409	1.35901	0.2527	-2.39158	0.25267	1.78356	0.25233	2.60368
0.25285	-0.54685	0.25287	4.20223	0.25291	1.84795	0.25426	1.36919	0.25287	-2.39128	0.25284	1.78322	0.2525	2.59857
0.25301	-0.54845	0.25303	4.19968	0.25308	1.84701	0.25442	1.37946	0.25303	-2.39113	0.253	1.78343	0.25267	2.59399
0.25318	-0.54973	0.2532	4.19814	0.25325	1.84634	0.25459	1.39011	0.2532	-2.3905	0.25317	1.78405	0.25283	2.58932
0.25335	-0.54973	0.25337	4.19657	0.25341	1.84596	0.25476	1.4032	0.25337	-2.38971	0.25334	1.78515	0.253	2.58491
0.25351	-0.54925	0.25353	4.19496	0.25358	1.84596	0.25492	1.42328	0.25353	-2.38926	0.2535	1.7872	0.25317	2.58086
0.25368	-0.54909	0.2537	4.19327	0.25375	1.84609	0.25509	1.44797	0.2537	-2.38965	0.25367	1.78927	0.25333	2.57734
0.25385	-0.54967	0.25387	4.19129	0.25391	1.84617	0.25526	1.47548	0.25387	-2.39059	0.25384	1.79066	0.2535	2.57473
0.25401	-0.54975	0.25403	4.18911	0.25408	1.84616	0.25542	1.50718	0.25403	-2.39231	0.254	1.79176	0.25367	2.57209
0.25418	-0.54881	0.2542	4.18669	0.25425	1.84619	0.25559	1.53867	0.2542	-2.39398	0.25417	1.79159	0.25383	2.56868
0.25435	-0.54816	0.25436	4.18378	0.25441	1.84676	0.25576	1.56745	0.25437	-2.39533	0.25434	1.79048	0.254	2.56501
0.25451	-0.54864	0.25453	4.18066	0.25458	1.84749	0.25592	1.59473	0.25453	-2.39624	0.2545	1.7902	0.25417	2.5589
0.25468	-0.55064	0.2547	4.17733	0.25474	1.84831	0.25609	1.6182	0.2547	-2.39719	0.25467	1.79073	0.25433	2.55229
0.25484	-0.55434	0.25486	4.17405	0.25491	1.84978	0.25625	1.63821	0.25486	-2.39816	0.25484	1.79167	0.2545	2.54607
0.25501	-0.55932	0.25503	4.17117	0.25508	1.85103	0.25642	1.65507	0.25503	-2.39894	0.255	1.79362	0.25466	2.54104
0.25518	-0.56401	0.2552	4.16873	0.25524	1.84901	0.25659	1.66928	0.2552	-2.39924	0.25517	1.79594	0.25483	2.53664
0.25534	-0.56822	0.25536	4.16638	0.25541	1.84615	0.25675	1.68462	0.25536	-2.39928	0.25533	1.79763	0.255	2.53427
0.25551	-0.57188	0.25553	4.1641	0.25558	1.84259	0.25692	1.70228	0.25553	-2.3993	0.2555	1.79895	0.25516	2.53193
0.25568	-0.57502	0.2557	4.16133	0.25574	1.83827	0.25709	1.72059	0.2557	-2.3993	0.25567	1.80032	0.25533	2.52993
0.25584	-0.5781	0.25586	4.15745	0.25591	1.83506	0.25725	1.73832	0.25586	-2.39994	0.25583	1.80175	0.2555	2.5282
0.25601	-0.58081	0.25603	4.15364	0.25608	1.83343	0.25742	1.75571	0.25603	-2.40173	0.256	1.80364	0.25566	2.52741
0.25618	-0.58299	0.2562	4.15129	0.25624	1.83212	0.25759	1.76988	0.2562	-2.40367	0.25617	1.80591	0.25583	2.52721
0.25634	-0.58519	0.25636	4.14958	0.25641	1.83155	0.25775	1.78065	0.25636	-2.40583	0.25633	1.80834	0.256	2.52699
0.25651	-0.5875	0.25653	4.14827	0.25658	1.83127	0.25792	1.78478	0.25653	-2.40776	0.2565	1.81086	0.25616	2.52667
0.25668	-0.58997	0.25669	4.14749	0.25674	1.83176	0.25809	1.78365	0.2567	-2.40895	0.25667	1.81341	0.25633	2.5265
0.25684	-0.59292	0.25686	4.14658	0.25691	1.8325	0.25825	1.78227	0.25686	-2.40937	0.25683	1.81546	0.2565	2.52795
0.25701	-0.59613	0.25703	4.1455	0.25708	1.83249	0.25842	1.78207	0.25703	-2.40934	0.257	1.81724	0.25666	2.52944
0.25717	-0.59897	0.25719	4.14469	0.25724	1.83051	0.25859	1.78253	0.2572	-2.40902	0.25717	1.81842	0.25683	2.53151
0.25734	-0.60176	0.25736	4.14472	0.25741	1.82802	0.25875	1.78271	0.25736	-2.40875	0.25733	1.81863	0.25699	2.53435
0.25751	-0.60449	0.25753	4.14533	0.25758	1.82518	0.25892	1.78273	0.25753	-2.40855	0.2575	1.81792	0.25716	2.53703
0.25767	-0.60712	0.25769	4.14598	0.25774	1.82228	0.25909	1.7845	0.25769	-2.40792	0.25766	1.81632	0.25733	2.53938
0.25784	-0.60938	0.25786	4.14665	0.25791	1.82131	0.25925	1.78868	0.25786	-2.40659	0.25783	1.8144	0.25749	2.54174
0.25801	-0.61091	0.25803	4.14673	0.25807	1.82156	0.25942	1.79032	0.25803	-2.40543	0.258	1.81264	0.25766	2.5451
0.25817	-0.61249	0.25819	4.14592	0.25824	1.82208	0.25958	1.78822	0.25819	-2.40558	0.25816	1.81104	0.25783	2.54876
0.25834	-0.61414	0.25836	4.1452	0.25841	1.82268	0.25975	1.78515	0.25836	-2.40722	0.25833	1.81087	0.25799	2.55332
0.25851	-0.61553	0.25853	4.14489	0.25857	1.82328	0.25992	1.78542	0.25853	-2.40923	0.2585	1.81154	0.25816	2.55794
0.25867	-0.61578	0.25869	4.14457	0.25874	1.8234	0.26008	1.78835	0.25869	-2.41166	0.25866	1.81238	0.25833	2.5629
0.25884	-0.61508	0.25886	4.14373	0.25891	1.82336	0.26025	1.79563	0.25886	-2.41354	0.25883	1.81354	0.25849	2.56889
0.25901	-0.61469	0.25902	4.14233	0.25907	1.82262	0.26042	1.80547	0.25903	-2.41431	0.259	1.81444	0.25866	2.57431
0.25917	-0.615	0.25919	4.14048	0.25924	1.82179	0.26058	1.82064	0.25919	-2.41481	0.25916	1.81421	0.25883	2.5788
0.25934	-0.61583	0.25936	4.13819	0.25941	1.82131	0.26075	1.84718	0.25936	-2.4158	0.25933	1.81355	0.25899	2.58353
0.2595	-0.61721	0.25952	4.13613	0.25957	1.82142	0.26092	1.87724	0.25953	-2.41698	0.2595	1.81273	0.25916	2.59008
0.25967	-0.61883	0.25969	4.1346	0.25974	1.82228	0.26108	1.90483	0.25969	-2.41973	0.25966	1.81174	0.25932	2.59806
0.25984	-0.61954	0.25986	4.13393	0.25991	1.82391	0.26125	1.93163	0.25986	-2.4245	0.25983	1.81066	0.25949	2.60572
0.26	-0.61834	0.26002	4.13436	0.26007	1.82563	0.26142	1.96215	0.26002	-2.42855	0.25999	1.80952	0.25966	2.61336
0.26017	-0.61747	0.26019	4.13524	0.26024	1.8276	0.26158	1.9954	0.26019	-2.43162	0.26016	1.80853	0.25982	2.62107
0.26034	-0.61717	0.26036	4.137	0.26041	1.82968	0.26175	2.03301	0.26036	-2.43425	0.26033	1.80921	0.25999	2.6308
0.2605	-0.61689	0.26052	4.13978	0.26057	1.83091	0.26192	2.0735	0.26052	-2.43567	0.26049	1.81051	0.26016	2.64078
0.26067	-0.61664	0.26069	4.14221	0.26074	1.83193	0.26208	2.11712	0.26069	-2.43656	0.26066	1.81167	0.26032	2.65058
0.26084	-0.61624	0.26086	4.1442	0.26091	1.83267	0.26225	2.17183	0.26086	-2.43821	0.26083	1.81283	0.26049	2.66041
0.261	-0.61533	0.26102	4.1458	0.26107	1.83087	0.26242	2.23187	0.26102	-2.44036	0.26099	1.81361	0.26066	2.6688
0.26117	-0.61403	0.26119	4.1461	0.26124	1.82959	0.26258	2.29045	0.26119	-2.44236	0.26116	1.81392	0.26082	2.67587
0.26134	-0.61315	0.26136	4.14518	0.2614	1.83038	0.26275	2.34878	0.26136	-2.44407	0.26133	1.81459	0.26099	2.68228
0.2615	-0.61321	0.26152	4.14341	0.26157	1.8314	0.26291	2.41139	0.26152	-2.4457	0.26149	1.81604	0.26116	2.68795
0.26167	-0.61363	0.26169	4.14116	0.26174	1.83295	0.26308	2.4784	0.26169	-2.44725	0.26166	1.8179	0.26132	2.69328
0.26184	-0.6141	0.26185	4.13939	0.2619	1.83534	0.26325	2.54533	0.26186	-2.44889	0.26183	1.8201	0.26149	2.69701
0.262	-0.6147	0.26202	4.1383	0.26207	1.83571	0.26341	2.60989	0.26202	-2.45113	0.26199	1.82309	0.26165	2.70016
0.26217	-0.6164	0.26219	4.13812	0.26224	1.83496	0.26358	2.67438	0.26219	-2.45362	0.26216	1.82616	0.26182	2.70246
0.26233	-0.61985	0.26235	4.13876	0.2624	1.83414	0.26375	2.76017	0.26236	-2.45473	0.26232	1.82904	0.26199	2.7045
0.2625	-0.62317	0.26252	4.13937	0.26257	1.83485	0.26391	2.85825	0.26252	-2.45452	0.26249	1.8319	0.26215	2.70619
0.26267	-0.62642	0.26269	4.13819	0.26274	1.83605	0.26408	2.95141	0.26269	-2.45427	0.26266	1.83471	0.26232	2.70709
0.26283	-0.62922	0.26285	4.13565	0.2629	1.83784	0.26425	3.04308	0.26285	-2.45394	0.26282	1.83755	0.26249	2.70759
0.263	-0.63091	0.26302	4.13364	0.26307	1.83964	0.26441	3.13833	0.26302	-2.45418	0.26299	1.84041	0.26265	2.70722
0.26317	-0.63156	0.26319	4.13207	0.26324	1.84124	0.26458	3.23958	0.26319	-2.45552	0.26316	1.84305	0.26282	2.70659
0.26333	-0.63149	0.26335	4.13066	0.2634	1.84187	0.26475	3.33822	0.26335	-2.45727	0.26332	1.84551	0.26299	2.7048
0.2635	-0.63109	0.26352	4.12948	0.26357	1.84206	0.26491	3.4234	0.26352	-2.45936	0.26349	1.8477	0.26315	2.70185
0.26367	-0.63128	0.26369	4.12814	0.26374	1.84164	0.26508	3.50696	0.26369	-2.46187	0.26366	1.84908	0.26332	2.69703
0.26383	-0.63253	0.26385	4.12627	0.2639	1.84119	0.26525	3.58832	0.26385	-2.46261	0.26382	1.85018	0.26349	2.69089
0.264	-0.63496	0.26402	4.12419	0.26407	1.84079	0.26541	3.66913	0.26402	-2.46147	0.26399	1.85146	0.26365	2.68541
0.26417	-0.63911	0.26418	4.12295	0.26424	1.84045	0.26558	3.74418	0.26419	-2.46004	0.26416	1.85281	0.26382	2.68229
0.26433	-0.64307	0.26435	4.1225	0.2644	1.83986	0.26575	3.81723	0.26435	-2.45778	0.26432	1.85439	0.26398	2.67878
0.2645	-0.64634	0.26452	4.12113	0.26457	1.83914	0.26591	3.89099	0.26452	-2.45555	0.26449	1.85621	0.26415	2.67328
0.26466	-0.64891	0.26468	4.11879	0.26473	1.83842	0.26608	3.95712	0.26469	-2.45454	0.26465	1.85702	0.26432	2.66769
0.26483	-0.65138	0.26485	4.11602	0.2649	1.83645	0.26624	4.01875	0.26485	-2.45425	0.26482	1.85647	0.26448	2.66156
0.265	-0.65383	0.26502	4.11216	0.26507	1.83472	0.26641	4.06817	0.26502	-2.45407	0.26499	1.85591	0.26465	2.65512
0.26516	-0.65662	0.26518	4.10822	0.26523	1.83577	0.26658	4.11327	0.26518	-2.45402	0.26515	1.85537	0.26482	2.64995
0.26533	-0.66003	0.26535	4.10557	0.2654	1.83686	0.26674	4.15938	0.26535	-2.45422	0.26532	1.85503	0.26498	2.6461
0.2655	-0.66316	0.26552	4.10367	0.26557	1.83843	0.26691	4.20807	0.26552	-2.45467	0.26549	1.85519	0.26515	2.64259
0.26566	-0.6654	0.26568	4.103	0.26573	1.84069	0.26708	4.25132	0.26568	-2.4552	0.26565	1.85563	0.26532	2.64033
0.26583	-0.66725	0.26585	4.1038	0.2659	1.84234	0.26724	4.29015	0.26585	-2.45591	0.26582	1.856	0.26548	2.63876
0.266	-0.66803	0.26602	4.10445	0.26607	1.84312	0.26741	4.32795	0.26602	-2.45662	0.26599	1.85623	0.26565	2.63872
0.26616	-0.66751	0.26618	4.10444	0.26623	1.8439	0.26758	4.36809	0.26618	-2.45665	0.26615	1.85585	0.26582	2.63888
0.26633	-0.66565	0.26635	4.10411	0.2664	1.84412	0.26774	4.40911	0.26635	-2.45623	0.26632	1.8546	0.26598	2.63796
0.2665	-0.66231	0.26651	4.10242	0.26657	1.84421	0.26791	4.42585	0.26652	-2.45644	0.26649	1.85331	0.26615	2.63518
0.26666	-0.6587	0.26668	4.1001	0.26673	1.84261	0.26808	4.43424	0.26668	-2.45759	0.26665	1.85228	0.26631	2.63277
0.26683	-0.65433	0.26685	4.09975	0.2669	1.84065	0.26824	4.44304	0.26685	-2.4591	0.26682	1.85155	0.26648	2.63111
0.26699	-0.65016	0.26701	4.10068	0.26707	1.83849	0.26841	4.45371	0.26702	-2.4607	0.26698	1.85086	0.26665	2.62891
0.26716	-0.64713	0.26718	4.10185	0.26723	1.83579	0.26858	4.46106	0.26718	-2.46235	0.26715	1.85022	0.26681	2.62466
0.26733	-0.64471	0.26735	4.10337	0.2674	1.83338	0.26874	4.46144	0.26735	-2.46291	0.26732	1.8493	0.26698	2.6198
0.26749	-0.64226	0.26751	4.10493	0.26757	1.83193	0.26891	4.46003	0.26752	-2.46248	0.26748	1.84783	0.26715	2.61602
0.26766	-0.63963	0.26768	4.10621	0.26773	1.83051	0.26908	4.45816	0.26768	-2.46154	0.26765	1.84654	0.26731	2.61294
0.26783	-0.63623	0.26785	4.10741	0.2679	1.83055	0.26924	4.45593	0.26785	-2.46025	0.26782	1.84607	0.26748	2.61111
0.26799	-0.63198	0.26801	4.10844	0.26806	1.83154	0.26941	4.45503	0.26801	-2.45881	0.26798	1.84595	0.26765	2.61262
0.26816	-0.62781	0.26818	4.10936	0.26823	1.83246	0.26957	4.45511	0.26818	-2.45688	0.26815	1.84584	0.26781	2.61332
0.26833	-0.62458	0.26835	4.10933	0.2684	1.83333	0.26974	4.45508	0.26835	-2.45506	0.26832	1.84574	0.26798	2.61192
0.26849	-0.62243	0.26851	4.1086	0.26856	1.83407	0.26991	4.45287	0.26851	-2.45403	0.26848	1.84539	0.26815	2.61065
0.26866	-0.62108	0.26868	4.10749	0.26873	1.83174	0.27007	4.45073	0.26868	-2.45341	0.26865	1.84471	0.26831	2.60999
0.26883	-0.62033	0.26884	4.10547	0.2689	1.82954	0.27024	4.45543	0.26885	-2.45316	0.26882	1.84434	0.26848	2.61001
0.26899	-0.6194	0.26901	4.10337	0.26906	1.82855	0.27041	4.46158	0.26901	-2.45331	0.26898	1.84477	0.26864	2.61058
0.26916	-0.61818	0.26918	4.10242	0.26923	1.82759	0.27057	4.47213	0.26918	-2.45346	0.26915	1.84571	0.26881	2.6117
0.26933	-0.61643	0.26934	4.102	0.2694	1.82733	0.27074	4.48762	0.26935	-2.45348	0.26931	1.84664	0.26898	2.61326
0.26949	-0.61408	0.26951	4.10168	0.26956	1.82795	0.27091	4.50295	0.26951	-2.4535	0.26948	1.84757	0.26914	2.61595
0.26966	-0.61156	0.26968	4.10146	0.26973	1.82811	0.27107	4.51657	0.26968	-2.45367	0.26965	1.84848	0.26931	2.61852
0.26982	-0.60873	0.26984	4.09987	0.2699	1.82761	0.27124	4.52981	0.26985	-2.45391	0.26981	1.84935	0.26948	2.61988
0.26999	-0.60571	0.27001	4.09685	0.27006	1.82712	0.27141	4.54147	0.27001	-2.45395	0.26998	1.8503	0.26964	2.62097
0.27016	-0.60389	0.27018	4.09365	0.27023	1.82646	0.27157	4.55259	0.27018	-2.45388	0.27015	1.85137	0.26981	2.62205
0.27032	-0.60313	0.27034	4.09092	0.2704	1.82582	0.27174	4.56086	0.27035	-2.45363	0.27031	1.85233	0.26998	2.62327
0.27049	-0.60233	0.27051	4.08857	0.27056	1.8257	0.27191	4.56848	0.27051	-2.45309	0.27048	1.85263	0.27014	2.62568
0.27066	-0.60147	0.27068	4.08777	0.27073	1.82574	0.27207	4.57818	0.27068	-2.45172	0.27065	1.85232	0.27031	2.6299
0.27082	-0.60091	0.27084	4.08765	0.27089	1.82609	0.27224	4.59364	0.27084	-2.44946	0.27081	1.85171	0.27048	2.63382
0.27099	-0.601	0.27101	4.08881	0.27106	1.82734	0.27241	4.60973	0.27101	-2.44692	0.27098	1.85087	0.27064	2.63699
0.27116	-0.60142	0.27118	4.09181	0.27123	1.82877	0.27257	4.62351	0.27118	-2.44442	0.27115	1.85054	0.27081	2.64036
0.27132	-0.60261	0.27134	4.09518	0.27139	1.83078	0.27274	4.63732	0.27134	-2.44193	0.27131	1.85102	0.27097	2.64583
0.27149	-0.60473	0.27151	4.0982	0.27156	1.83252	0.2729	4.64503	0.27151	-2.44068	0.27148	1.85216	0.27114	2.65222
0.27166	-0.60713	0.27167	4.10088	0.27173	1.83219	0.27307	4.64908	0.27168	-2.44027	0.27165	1.85383	0.27131	2.65913
0.27182	-0.60961	0.27184	4.10296	0.27189	1.83038	0.27324	4.65314	0.27184	-2.44015	0.27181	1.85568	0.27147	2.66687
0.27199	-0.61239	0.27201	4.10461	0.27206	1.82715	0.2734	4.65762	0.27201	-2.44064	0.27198	1.85762	0.27164	2.67328
0.27215	-0.61631	0.27217	4.10632	0.27223	1.82306	0.27357	4.66303	0.27218	-2.4416	0.27214	1.85967	0.27181	2.6764
0.27232	-0.62067	0.27234	4.10815	0.27239	1.81894	0.27374	4.67665	0.27234	-2.44308	0.27231	1.86171	0.27197	2.67957
0.27249	-0.62402	0.27251	4.11011	0.27256	1.81457	0.2739	4.69225	0.27251	-2.44477	0.27248	1.86371	0.27214	2.68307
0.27265	-0.6267	0.27267	4.11226	0.27273	1.81056	0.27407	4.70985	0.27268	-2.44647	0.27264	1.86574	0.27231	2.68697
0.27282	-0.62901	0.27284	4.11487	0.27289	1.80931	0.27424	4.72762	0.27284	-2.44813	0.27281	1.86786	0.27247	2.69017
0.27299	-0.63075	0.27301	4.11845	0.27306	1.80809	0.2744	4.7421	0.27301	-2.44938	0.27298	1.86969	0.27264	2.69289
0.27315	-0.63243	0.27317	4.12238	0.27323	1.80677	0.27457	4.75327	0.27317	-2.45022	0.27314	1.87067	0.27281	2.69558
0.27332	-0.6344	0.27334	4.12568	0.27339	1.8053	0.27474	4.759	0.27334	-2.45097	0.27331	1.87123	0.27297	2.69775
0.27349	-0.63648	0.27351	4.12834	0.27356	1.80306	0.2749	4.75964	0.27351	-2.4517	0.27348	1.87238	0.27314	2.69937
0.27365	-0.63779	0.27367	4.13067	0.27373	1.8	0.27507	4.75973	0.27367	-2.45239	0.27364	1.87414	0.2733	2.69975
0.27382	-0.63837	0.27384	4.13293	0.27389	1.79713	0.27524	4.76334	0.27384	-2.45291	0.27381	1.87607	0.27347	2.69983
0.27399	-0.63922	0.274	4.13508	0.27406	1.79491	0.2754	4.76759	0.27401	-2.45335	0.27398	1.87804	0.27364	2.6998
0.27415	-0.64034	0.27417	4.13667	0.27422	1.793	0.27557	4.77369	0.27417	-2.45408	0.27414	1.87993	0.2738	2.69951
0.27432	-0.64148	0.27434	4.13789	0.27439	1.79125	0.27573	4.78019	0.27434	-2.45525	0.27431	1.88148	0.27397	2.69925
0.27448	-0.64269	0.2745	4.13861	0.27456	1.78952	0.2759	4.78727	0.27451	-2.45673	0.27447	1.883	0.27414	2.69905
0.27465	-0.64399	0.27467	4.13908	0.27472	1.78771	0.27607	4.79575	0.27467	-2.45853	0.27464	1.88523	0.2743	2.69917
0.27482	-0.64537	0.27484	4.14008	0.27489	1.78559	0.27623	4.8015	0.27484	-2.46043	0.27481	1.88791	0.27447	2.70065
0.27498	-0.64676	0.275	4.14192	0.27506	1.78302	0.2764	4.80133	0.27501	-2.46216	0.27497	1.89015	0.27464	2.70342
0.27515	-0.64818	0.27517	4.14273	0.27522	1.77973	0.27657	4.80062	0.27517	-2.46385	0.27514	1.89168	0.2748	2.70676
0.27532	-0.64961	0.27534	4.1417	0.27539	1.77658	0.27673	4.79726	0.27534	-2.46547	0.27531	1.89239	0.27497	2.7105
0.27548	-0.65012	0.2755	4.14003	0.27556	1.77424	0.2769	4.79255	0.27551	-2.4671	0.27547	1.89231	0.27514	2.71465
0.27565	-0.64981	0.27567	4.13829	0.27572	1.77306	0.27707	4.79428	0.27567	-2.46856	0.27564	1.89196	0.2753	2.71968
0.27582	-0.64936	0.27584	4.13646	0.27589	1.77391	0.27723	4.79949	0.27584	-2.46946	0.27581	1.89028	0.27547	2.72458
0.27598	-0.64878	0.276	4.13545	0.27606	1.77589	0.2774	4.80473	0.276	-2.46996	0.27597	1.88773	0.27563	2.72865
0.27615	-0.64785	0.27617	4.13488	0.27622	1.77755	0.27757	4.80264	0.27617	-2.46982	0.27614	1.88505	0.2758	2.73267
0.27632	-0.64572	0.27633	4.13437	0.27639	1.77769	0.27773	4.79928	0.27634	-2.46947	0.27631	1.88229	0.27597	2.73706
0.27648	-0.64292	0.2765	4.13423	0.27656	1.77773	0.2779	4.78705	0.2765	-2.46916	0.27647	1.88011	0.27613	2.74202
0.27665	-0.63977	0.27667	4.13413	0.27672	1.77802	0.27807	4.77393	0.27667	-2.46889	0.27664	1.87916	0.2763	2.74663
0.27681	-0.63581	0.27683	4.13379	0.27689	1.77847	0.27823	4.76214	0.27684	-2.46865	0.2768	1.8787	0.27647	2.75081
0.27698	-0.63182	0.277	4.13334	0.27706	1.77986	0.2784	4.75165	0.277	-2.46843	0.27697	1.87815	0.27663	2.75499
0.27715	-0.6284	0.27717	4.13251	0.27722	1.78256	0.27857	4.74446	0.27717	-2.46827	0.27714	1.87756	0.2768	2.75954
0.27731	-0.62519	0.27733	4.13113	0.27739	1.78532	0.27873	4.74129	0.27734	-2.46866	0.2773	1.87555	0.27697	2.76454
0.27748	-0.62269	0.2775	4.13038	0.27755	1.78818	0.2789	4.73817	0.2775	-2.46929	0.27747	1.87231	0.27713	2.76995
0.27765	-0.62074	0.27767	4.13025	0.27772	1.79089	0.27906	4.72331	0.27767	-2.46997	0.27764	1.8682	0.2773	2.77545
0.27781	-0.61982	0.27783	4.13024	0.27789	1.79312	0.27923	4.7057	0.27784	-2.47068	0.2778	1.86355	0.27747	2.78129
0.27798	-0.61948	0.278	4.13132	0.27805	1.79498	0.2794	4.68356	0.278	-2.47198	0.27797	1.85901	0.27763	2.78767
0.27815	-0.61915	0.27817	4.13299	0.27822	1.79617	0.27956	4.66175	0.27817	-2.47419	0.27814	1.85525	0.2778	2.79425
0.27831	-0.61858	0.27833	4.13531	0.27839	1.7971	0.27973	4.63915	0.27833	-2.47636	0.2783	1.85204	0.27796	2.80101
0.27848	-0.61785	0.2785	4.13789	0.27855	1.79803	0.2799	4.61765	0.2785	-2.47814	0.27847	1.84918	0.27813	2.80789
0.27865	-0.61703	0.27866	4.14018	0.27872	1.79898	0.28006	4.59467	0.27867	-2.4798	0.27864	1.84646	0.2783	2.81599
0.27881	-0.61618	0.27883	4.14158	0.27889	1.80005	0.28023	4.57024	0.27883	-2.48052	0.2788	1.84406	0.27846	2.82473
0.27898	-0.61488	0.279	4.14208	0.27905	1.80132	0.2804	4.54675	0.279	-2.48076	0.27897	1.84203	0.27863	2.832
0.27915	-0.61302	0.27916	4.14177	0.27922	1.80232	0.28056	4.53119	0.27917	-2.48108	0.27913	1.84066	0.2788	2.83844
0.27931	-0.61096	0.27933	4.14124	0.27939	1.80215	0.28073	4.52169	0.27933	-2.48148	0.2793	1.83996	0.27896	2.84481
0.27948	-0.60891	0.2795	4.14077	0.27955	1.80094	0.2809	4.51477	0.2795	-2.48175	0.27947	1.83945	0.27913	2.85147
0.27964	-0.60688	0.27966	4.14034	0.27972	1.79886	0.28106	4.50907	0.27967	-2.48164	0.27963	1.83898	0.2793	2.8579
0.27981	-0.60492	0.27983	4.14001	0.27989	1.7961	0.28123	4.5035	0.27983	-2.4816	0.2798	1.83854	0.27946	2.86325
0.27998	-0.60298	0.28	4.13974	0.28005	1.79367	0.2814	4.48996	0.28	-2.48208	0.27997	1.83955	0.27963	2.86868
0.28014	-0.6012	0.28016	4.13942	0.28022	1.79199	0.28156	4.47677	0.28017	-2.48276	0.28013	1.84135	0.2798	2.8758
0.28031	-0.59947	0.28033	4.13865	0.28039	1.79093	0.28173	4.4712	0.28033	-2.48376	0.2803	1.84299	0.27996	2.88574
0.28048	-0.59807	0.2805	4.1377	0.28055	1.79124	0.2819	4.46526	0.2805	-2.48502	0.28047	1.84431	0.28013	2.89529
0.28064	-0.5973	0.28066	4.13638	0.28072	1.79179	0.28206	4.45491	0.28067	-2.48633	0.28063	1.84488	0.28029	2.90429
0.28081	-0.59719	0.28083	4.13494	0.28088	1.79286	0.28223	4.43852	0.28083	-2.48759	0.2808	1.8442	0.28046	2.91172
0.28098	-0.59793	0.281	4.13322	0.28105	1.79429	0.28239	4.42184	0.281	-2.48873	0.28097	1.8431	0.28063	2.91439
0.28114	-0.59896	0.28116	4.13113	0.28122	1.79474	0.28256	4.40324	0.28116	-2.4885	0.28113	1.84206	0.28079	2.91384
0.28131	-0.59914	0.28133	4.12937	0.28138	1.79403	0.28273	4.38435	0.28133	-2.48778	0.2813	1.8411	0.28096	2.91294
0.28148	-0.59879	0.28149	4.12815	0.28155	1.79328	0.28289	4.36167	0.2815	-2.48648	0.28146	1.84175	0.28113	2.91177
0.28164	-0.59766	0.28166	4.12705	0.28172	1.79252	0.28306	4.34076	0.28166	-2.48493	0.28163	1.84346	0.28129	2.90853
0.28181	-0.59608	0.28183	4.12587	0.28188	1.79193	0.28323	4.33065	0.28183	-2.48358	0.2818	1.84557	0.28146	2.9011
0.28197	-0.59466	0.28199	4.12464	0.28205	1.79179	0.28339	4.32353	0.282	-2.48245	0.28196	1.84856	0.28163	2.89316
0.28214	-0.59418	0.28216	4.12225	0.28222	1.79185	0.28356	4.31896	0.28216	-2.48069	0.28213	1.85173	0.28179	2.88474
0.28231	-0.59448	0.28233	4.11937	0.28238	1.79239	0.28373	4.32102	0.28233	-2.47804	0.2823	1.85402	0.28196	2.87594
0.28247	-0.5949	0.28249	4.11616	0.28255	1.79376	0.28389	4.32298	0.2825	-2.47517	0.28246	1.85594	0.28213	2.86586
0.28264	-0.59552	0.28266	4.11211	0.28272	1.79511	0.28406	4.32471	0.28266	-2.47157	0.28263	1.85807	0.28229	2.85419
0.28281	-0.59614	0.28283	4.1082	0.28288	1.7965	0.28423	4.32697	0.28283	-2.46764	0.2828	1.86044	0.28246	2.84141
0.28297	-0.5967	0.28299	4.1052	0.28305	1.79762	0.28439	4.33192	0.283	-2.46468	0.28296	1.86252	0.28262	2.82752
0.28314	-0.59724	0.28316	4.1024	0.28322	1.79802	0.28456	4.33685	0.28316	-2.46213	0.28313	1.86426	0.28279	2.8128
0.28331	-0.59823	0.28333	4.0997	0.28338	1.79831	0.28473	4.33365	0.28333	-2.45995	0.2833	1.8659	0.28296	2.79615
0.28347	-0.59968	0.28349	4.09707	0.28355	1.79978	0.28489	4.32572	0.2835	-2.45866	0.28346	1.86576	0.28312	2.7785
0.28364	-0.60131	0.28366	4.09439	0.28372	1.80197	0.28506	4.31747	0.28366	-2.45774	0.28363	1.86491	0.28329	2.76074
0.28381	-0.60253	0.28382	4.09173	0.28388	1.80432	0.28523	4.30658	0.28383	-2.45724	0.28379	1.86398	0.28346	2.74261
0.28397	-0.60318	0.28399	4.089	0.28405	1.8071	0.28539	4.29729	0.28399	-2.45681	0.28396	1.86306	0.28362	2.72373
0.28414	-0.60379	0.28416	4.08652	0.28421	1.8095	0.28556	4.29417	0.28416	-2.45635	0.28413	1.86251	0.28379	2.70326
0.2843	-0.60435	0.28432	4.08406	0.28438	1.81118	0.28572	4.29079	0.28433	-2.45589	0.28429	1.86265	0.28396	2.68069
0.28447	-0.60493	0.28449	4.08216	0.28455	1.81272	0.28589	4.28596	0.28449	-2.45503	0.28446	1.86316	0.28412	2.65583
0.28464	-0.60563	0.28466	4.08035	0.28471	1.81376	0.28606	4.28017	0.28466	-2.45393	0.28463	1.86397	0.28429	2.63116
0.2848	-0.60623	0.28482	4.07787	0.28488	1.81421	0.28622	4.27903	0.28483	-2.45277	0.28479	1.86489	0.28446	2.60628
0.28497	-0.60627	0.28499	4.07427	0.28505	1.81412	0.28639	4.28294	0.28499	-2.45094	0.28496	1.86558	0.28462	2.58393
0.28514	-0.60589	0.28516	4.0709	0.28521	1.8135	0.28656	4.28719	0.28516	-2.44912	0.28513	1.86613	0.28479	2.56655
0.2853	-0.60543	0.28532	4.06779	0.28538	1.81308	0.28672	4.29331	0.28533	-2.44872	0.28529	1.86655	0.28495	2.55179
0.28547	-0.60484	0.28549	4.06479	0.28555	1.81307	0.28689	4.30039	0.28549	-2.44864	0.28546	1.8669	0.28512	2.53642
0.28564	-0.60468	0.28566	4.06347	0.28571	1.8132	0.28706	4.3103	0.28566	-2.44868	0.28563	1.86752	0.28529	2.52009
0.2858	-0.60535	0.28582	4.06323	0.28588	1.81336	0.28722	4.32076	0.28583	-2.44891	0.28579	1.86933	0.28545	2.50626
0.28597	-0.60618	0.28599	4.06322	0.28605	1.81349	0.28739	4.33304	0.28599	-2.44899	0.28596	1.87126	0.28562	2.49611
0.28614	-0.60694	0.28615	4.06323	0.28621	1.81327	0.28756	4.34839	0.28616	-2.44886	0.28613	1.87221	0.28579	2.48618
0.2863	-0.60744	0.28632	4.06336	0.28638	1.81254	0.28772	4.36006	0.28632	-2.44869	0.28629	1.87289	0.28595	2.4757
0.28647	-0.60703	0.28649	4.06457	0.28655	1.81125	0.28789	4.36596	0.28649	-2.44924	0.28646	1.8736	0.28612	2.46478
0.28664	-0.60563	0.28665	4.06634	0.28671	1.80923	0.28806	4.37006	0.28666	-2.45012	0.28662	1.87436	0.28629	2.45515
0.2868	-0.60491	0.28682	4.06899	0.28688	1.80709	0.28822	4.36654	0.28682	-2.45186	0.28679	1.87489	0.28645	2.44662
0.28697	-0.60555	0.28699	4.07176	0.28704	1.80463	0.28839	4.35841	0.28699	-2.45379	0.28696	1.8752	0.28662	2.43814
0.28713	-0.60686	0.28715	4.07445	0.28721	1.80231	0.28856	4.3477	0.28716	-2.45592	0.28712	1.87546	0.28679	2.4296
0.2873	-0.60822	0.28732	4.07707	0.28738	1.80072	0.28872	4.33559	0.28732	-2.45854	0.28729	1.87469	0.28695	2.42215
0.28747	-0.6096	0.28749	4.07957	0.28754	1.79955	0.28889	4.32426	0.28749	-2.46088	0.28746	1.87353	0.28712	2.41669
0.28763	-0.61099	0.28765	4.08195	0.28771	1.79926	0.28905	4.31533	0.28766	-2.46235	0.28762	1.87432	0.28728	2.41185
0.2878	-0.61236	0.28782	4.08433	0.28788	1.80017	0.28922	4.30741	0.28782	-2.46364	0.28779	1.87567	0.28745	2.40647
0.28797	-0.61421	0.28799	4.08694	0.28804	1.80099	0.28939	4.30165	0.28799	-2.4649	0.28796	1.87743	0.28762	2.40048
0.28813	-0.6167	0.28815	4.08963	0.28821	1.8015	0.28955	4.29581	0.28816	-2.46614	0.28812	1.88121	0.28778	2.39565
0.2883	-0.6188	0.28832	4.09212	0.28838	1.80198	0.28972	4.28958	0.28832	-2.46737	0.28829	1.88492	0.28795	2.39198
0.28847	-0.61955	0.28848	4.09453	0.28854	1.80258	0.28989	4.28336	0.28849	-2.46865	0.28846	1.8879	0.28812	2.38807
0.28863	-0.61912	0.28865	4.09684	0.28871	1.80346	0.29005	4.27879	0.28866	-2.46995	0.28862	1.89084	0.28828	2.38307
0.2888	-0.6186	0.28882	4.09867	0.28888	1.80485	0.29022	4.27564	0.28882	-2.47099	0.28879	1.89321	0.28845	2.37703
0.28897	-0.618	0.28898	4.10119	0.28904	1.8066	0.29039	4.27138	0.28899	-2.47203	0.28895	1.89519	0.28862	2.37054
0.28913	-0.61771	0.28915	4.10478	0.28921	1.80791	0.29055	4.264	0.28915	-2.47379	0.28912	1.89737	0.28878	2.36375
0.2893	-0.61792	0.28932	4.10857	0.28938	1.80842	0.29072	4.25499	0.28932	-2.4757	0.28929	1.8996	0.28895	2.35687
0.28946	-0.61839	0.28948	4.11155	0.28954	1.80833	0.29089	4.24423	0.28949	-2.47765	0.28945	1.9019	0.28912	2.34982
0.28963	-0.61898	0.28965	4.11419	0.28971	1.80786	0.29105	4.2334	0.28965	-2.47971	0.28962	1.90412	0.28928	2.34326
0.2898	-0.61959	0.28982	4.11485	0.28988	1.80728	0.29122	4.2243	0.28982	-2.48167	0.28979	1.90609	0.28945	2.33746
0.28996	-0.62025	0.28998	4.1146	0.29004	1.80516	0.29139	4.21832	0.28999	-2.48344	0.28995	1.90675	0.28961	2.33186
0.29013	-0.62097	0.29015	4.11433	0.29021	1.80138	0.29155	4.21037	0.29015	-2.48514	0.29012	1.9072	0.28978	2.32609
0.2903	-0.62177	0.29032	4.11437	0.29037	1.79801	0.29172	4.19944	0.29032	-2.48541	0.29029	1.90718	0.28995	2.32023
0.29046	-0.62263	0.29048	4.11429	0.29054	1.79507	0.29189	4.18758	0.29049	-2.48515	0.29045	1.90637	0.29011	2.31514
0.29063	-0.62329	0.29065	4.11304	0.29071	1.79275	0.29205	4.17373	0.29065	-2.48405	0.29062	1.90538	0.29028	2.31066
0.2908	-0.62354	0.29082	4.11172	0.29087	1.79197	0.29222	4.16106	0.29082	-2.4827	0.29079	1.90431	0.29045	2.30607
0.29096	-0.62277	0.29098	4.11038	0.29104	1.79232	0.29238	4.15556	0.29099	-2.48155	0.29095	1.90328	0.29061	2.30089
0.29113	-0.62065	0.29115	4.10899	0.29121	1.79298	0.29255	4.1536	0.29115	-2.48133	0.29112	1.90182	0.29078	2.29522
0.2913	-0.61803	0.29131	4.10768	0.29137	1.79381	0.29272	4.1514	0.29132	-2.48104	0.29128	1.90018	0.29095	2.28961
0.29146	-0.61557	0.29148	4.10648	0.29154	1.7942	0.29288	4.14872	0.29148	-2.48016	0.29145	1.89971	0.29111	2.28403
0.29163	-0.61329	0.29165	4.10527	0.29171	1.79409	0.29305	4.14481	0.29165	-2.47925	0.29162	1.89952	0.29128	2.27797
0.29179	-0.61106	0.29181	4.10302	0.29187	1.79287	0.29322	4.13877	0.29182	-2.47793	0.29178	1.89959	0.29145	2.27118
0.29196	-0.60888	0.29198	4.10066	0.29204	1.79055	0.29338	4.13178	0.29198	-2.47636	0.29195	1.90056	0.29161	2.26464
0.29213	-0.60648	0.29215	4.09801	0.29221	1.78816	0.29355	4.12143	0.29215	-2.4748	0.29212	1.90129	0.29178	2.2588
0.29229	-0.60353	0.29231	4.09537	0.29237	1.78584	0.29372	4.10816	0.29232	-2.47325	0.29228	1.90008	0.29194	2.25298
0.29246	-0.60076	0.29248	4.09259	0.29254	1.78359	0.29388	4.09508	0.29248	-2.47174	0.29245	1.89847	0.29211	2.24699
0.29263	-0.59935	0.29265	4.08961	0.29271	1.78123	0.29405	4.08224	0.29265	-2.47075	0.29262	1.89718	0.29228	2.24114
0.29279	-0.59894	0.29281	4.08677	0.29287	1.77878	0.29422	4.07236	0.29282	-2.46982	0.29278	1.8962	0.29244	2.23642
0.29296	-0.59874	0.29298	4.08442	0.29304	1.77726	0.29438	4.0681	0.29298	-2.46913	0.29295	1.8958	0.29261	2.23252
0.29313	-0.59882	0.29315	4.08203	0.29321	1.77748	0.29455	4.06717	0.29315	-2.46844	0.29312	1.89583	0.29278	2.22838
0.29329	-0.5986	0.29331	4.07879	0.29337	1.77899	0.29472	4.06912	0.29332	-2.46731	0.29328	1.89594	0.29294	2.22376
0.29346	-0.59793	0.29348	4.07514	0.29354	1.78128	0.29488	4.07233	0.29348	-2.46555	0.29345	1.89535	0.29311	2.21904
0.29363	-0.59708	0.29364	4.07228	0.2937	1.78392	0.29505	4.07738	0.29365	-2.46369	0.29361	1.89461	0.29328	2.21459
0.29379	-0.59583	0.29381	4.06977	0.29387	1.78556	0.29521	4.08477	0.29382	-2.46169	0.29378	1.89388	0.29344	2.2103
0.29396	-0.59429	0.29398	4.06741	0.29404	1.78632	0.29538	4.09008	0.29398	-2.45968	0.29395	1.89318	0.29361	2.20684
0.29413	-0.5927	0.29414	4.06604	0.2942	1.78879	0.29555	4.09237	0.29415	-2.45719	0.29411	1.89235	0.29378	2.2047
0.29429	-0.59105	0.29431	4.06467	0.29437	1.79271	0.29571	4.09295	0.29431	-2.45463	0.29428	1.89135	0.29394	2.20315
0.29446	-0.58993	0.29448	4.06307	0.29454	1.79688	0.29588	4.08889	0.29448	-2.45367	0.29445	1.89077	0.29411	2.20191
0.29462	-0.58966	0.29464	4.06145	0.2947	1.80182	0.29605	4.08313	0.29465	-2.45312	0.29461	1.89098	0.29427	2.20069
0.29479	-0.59003	0.29481	4.05931	0.29487	1.8065	0.29621	4.07964	0.29481	-2.45288	0.29478	1.89133	0.29444	2.19945
0.29496	-0.59081	0.29498	4.05652	0.29504	1.80956	0.29638	4.07747	0.29498	-2.45383	0.29495	1.89105	0.29461	2.19775
0.29512	-0.59179	0.29514	4.05352	0.2952	1.81183	0.29655	4.07842	0.29515	-2.45451	0.29511	1.89053	0.29477	2.19603
0.29529	-0.59208	0.29531	4.05061	0.29537	1.8136	0.29671	4.08424	0.29531	-2.45424	0.29528	1.89037	0.29494	2.19482
0.29546	-0.59174	0.29548	4.04772	0.29554	1.81477	0.29688	4.09078	0.29548	-2.45395	0.29545	1.89037	0.29511	2.194
0.29562	-0.59112	0.29564	4.04479	0.2957	1.81629	0.29705	4.09781	0.29565	-2.45328	0.29561	1.89088	0.29527	2.19346
0.29579	-0.59033	0.29581	4.04237	0.29587	1.81826	0.29721	4.10373	0.29581	-2.45235	0.29578	1.89349	0.29544	2.19377
0.29596	-0.58961	0.29597	4.04002	0.29604	1.82041	0.29738	4.10519	0.29598	-2.45183	0.29594	1.89614	0.29561	2.19497
0.29612	-0.58933	0.29614	4.03848	0.2962	1.8232	0.29755	4.10365	0.29615	-2.45157	0.29611	1.89786	0.29577	2.19701
0.29629	-0.58951	0.29631	4.03716	0.29637	1.82636	0.29771	4.10562	0.29631	-2.45125	0.29628	1.89939	0.29594	2.19951
0.29646	-0.59024	0.29647	4.03583	0.29654	1.8294	0.29788	4.11046	0.29648	-2.44948	0.29644	1.90002	0.29611	2.20248
0.29662	-0.59124	0.29664	4.03452	0.2967	1.83237	0.29805	4.11378	0.29665	-2.44768	0.29661	1.89994	0.29627	2.20684
0.29679	-0.59199	0.29681	4.03328	0.29687	1.83492	0.29821	4.11471	0.29681	-2.44533	0.29678	1.89939	0.29644	2.21145
0.29695	-0.59236	0.29697	4.03222	0.29703	1.83675	0.29838	4.11168	0.29698	-2.44291	0.29694	1.89854	0.2966	2.21629
0.29712	-0.59236	0.29714	4.03124	0.2972	1.83722	0.29854	4.1032	0.29714	-2.4407	0.29711	1.89765	0.29677	2.22112
0.29729	-0.59209	0.29731	4.02953	0.29737	1.83596	0.29871	4.09361	0.29731	-2.43861	0.29728	1.89732	0.29694	2.22566
0.29745	-0.59175	0.29747	4.02699	0.29753	1.83403	0.29888	4.09074	0.29748	-2.43704	0.29744	1.89706	0.2971	2.22999
0.29762	-0.59127	0.29764	4.02479	0.2977	1.83237	0.29904	4.09433	0.29764	-2.43606	0.29761	1.89758	0.29727	2.23481
0.29779	-0.59075	0.29781	4.02316	0.29787	1.83087	0.29921	4.09577	0.29781	-2.43513	0.29778	1.89817	0.29744	2.24011
0.29795	-0.59067	0.29797	4.02165	0.29803	1.83045	0.29938	4.09498	0.29798	-2.43458	0.29794	1.89872	0.2976	2.24565
0.29812	-0.59083	0.29814	4.02159	0.2982	1.83083	0.29954	4.09388	0.29814	-2.4342	0.29811	1.89923	0.29777	2.25221
0.29829	-0.59106	0.29831	4.02208	0.29837	1.83149	0.29971	4.09215	0.29831	-2.43428	0.29827	1.89985	0.29794	2.25871
0.29845	-0.59143	0.29847	4.02184	0.29853	1.83273	0.29988	4.09226	0.29848	-2.43446	0.29844	1.90066	0.2981	2.26352
0.29862	-0.59134	0.29864	4.02131	0.2987	1.83397	0.30004	4.09685	0.29864	-2.4345	0.29861	1.90147	0.29827	2.26776
0.29879	-0.59036	0.2988	4.02114	0.29887	1.83433	0.30021	4.10382	0.29881	-2.43384	0.29877	1.90086	0.29844	2.27198
0.29895	-0.58902	0.29897	4.02169	0.29903	1.83432	0.30038	4.10571	0.29898	-2.43285	0.29894	1.89974	0.2986	2.2762
0.29912	-0.58663	0.29914	4.02306	0.2992	1.83276	0.30054	4.10176	0.29914	-2.43083	0.29911	1.89926	0.29877	2.28067
0.29928	-0.58342	0.2993	4.0253	0.29937	1.82981	0.30071	4.0933	0.29931	-2.4288	0.29927	1.89902	0.29893	2.28558
0.29945	-0.5807	0.29947	4.02776	0.29953	1.82705	0.30088	4.08085	0.29947	-2.42691	0.29944	1.89863	0.2991	2.29055
0.29962	-0.57855	0.29964	4.02934	0.2997	1.82483	0.30104	4.06892	0.29964	-2.42508	0.29961	1.89763	0.29927	2.2959
0.29978	-0.57679	0.2998	4.0304	0.29987	1.82276	0.30121	4.06225	0.29981	-2.4236	0.29977	1.89608	0.29943	2.30137
0.29995	-0.57789	0.29997	4.03089	0.30003	1.82084	0.30138	4.06124	0.29997	-2.42237	0.29994	1.89225	0.2996	2.30581
0.30012	-0.58037	0.30014	4.0311	0.3002	1.81891	0.30154	4.06513	0.30014	-2.42122	0.30011	1.88839	0.29977	2.30962
0.30028	-0.58244	0.3003	4.03113	0.30036	1.81628	0.30171	4.07223	0.30031	-2.42023	0.30027	1.88455	0.29993	2.3141
0.30045	-0.58429	0.30047	4.03057	0.30053	1.81328	0.30187	4.07944	0.30047	-2.41947	0.30044	1.88058	0.3001	2.3204
0.30062	-0.58508	0.30064	4.02981	0.3007	1.81067	0.30204	4.08693	0.30064	-2.41889	0.3006	1.87772	0.30027	2.3268
0.30078	-0.5843	0.3008	4.02901	0.30086	1.80865	0.30221	4.09622	0.30081	-2.41949	0.30077	1.87554	0.30043	2.33188
0.30095	-0.58332	0.30097	4.02819	0.30103	1.80725	0.30237	4.10774	0.30097	-2.42012	0.30094	1.87338	0.3006	2.33687
0.30112	-0.5827	0.30113	4.02652	0.3012	1.80657	0.30254	4.11985	0.30114	-2.42056	0.3011	1.87205	0.30077	2.34265
0.30128	-0.58219	0.3013	4.02403	0.30136	1.80611	0.30271	4.13224	0.30131	-2.42055	0.30127	1.87075	0.30093	2.34988
0.30145	-0.58159	0.30147	4.02219	0.30153	1.80483	0.30287	4.14393	0.30147	-2.42037	0.30144	1.86884	0.3011	2.35734
0.30162	-0.58095	0.30163	4.02113	0.3017	1.80317	0.30304	4.1482	0.30164	-2.42002	0.3016	1.8669	0.30126	2.36517
0.30178	-0.58044	0.3018	4.02025	0.30186	1.8012	0.30321	4.14666	0.30181	-2.41962	0.30177	1.86408	0.30143	2.37312
0.30195	-0.57999	0.30197	4.02006	0.30203	1.79903	0.30337	4.14327	0.30197	-2.41915	0.30194	1.85991	0.3016	2.38175
0.30211	-0.57976	0.30213	4.02013	0.3022	1.79707	0.30354	4.13538	0.30214	-2.41864	0.3021	1.85588	0.30176	2.39049
0.30228	-0.58036	0.3023	4.01861	0.30236	1.79554	0.30371	4.12554	0.3023	-2.41782	0.30227	1.85176	0.30193	2.39818
0.30245	-0.58123	0.30247	4.01661	0.30253	1.79394	0.30387	4.11643	0.30247	-2.41677	0.30244	1.84777	0.3021	2.40566
0.30261	-0.58196	0.30263	4.01426	0.3027	1.79169	0.30404	4.10748	0.30264	-2.41569	0.3026	1.84556	0.30226	2.41353
0.30278	-0.58261	0.3028	4.01105	0.30286	1.78927	0.30421	4.09754	0.3028	-2.41465	0.30277	1.84393	0.30243	2.42262
0.30295	-0.58238	0.30297	4.0071	0.30303	1.78746	0.30437	4.08672	0.30297	-2.41368	0.30294	1.84386	0.3026	2.43172
0.30311	-0.58117	0.30313	4.00242	0.30319	1.78636	0.30454	4.08159	0.30314	-2.41328	0.3031	1.84419	0.30276	2.44077
0.30328	-0.58092	0.3033	3.99761	0.30336	1.78711	0.30471	4.08151	0.3033	-2.41307	0.30327	1.84428	0.30293	2.44973
0.30345	-0.58146	0.30346	3.99372	0.30353	1.78918	0.30487	4.0827	0.30347	-2.4129	0.30343	1.84341	0.3031	2.45812
0.30361	-0.58214	0.30363	3.99016	0.30369	1.79154	0.30504	4.08764	0.30364	-2.41278	0.3036	1.84269	0.30326	2.4658
0.30378	-0.58439	0.3038	3.98773	0.30386	1.79498	0.3052	4.09349	0.3038	-2.41261	0.30377	1.8426	0.30343	2.47308
0.30395	-0.58704	0.30396	3.98576	0.30403	1.7988	0.30537	4.0938	0.30397	-2.41238	0.30393	1.8425	0.30359	2.48014
0.30411	-0.58646	0.30413	3.98368	0.30419	1.80241	0.30554	4.09063	0.30414	-2.41212	0.3041	1.84231	0.30376	2.48776
0.30428	-0.58473	0.3043	3.98054	0.30436	1.80599	0.3057	4.08633	0.3043	-2.41225	0.30427	1.84204	0.30393	2.49658
0.30444	-0.58269	0.30446	3.97722	0.30453	1.80944	0.30587	4.08009	0.30447	-2.41251	0.30443	1.84175	0.30409	2.50488
0.30461	-0.5802	0.30463	3.97446	0.30469	1.81258	0.30604	4.07284	0.30463	-2.41245	0.3046	1.84143	0.30426	2.51119
0.30478	-0.57867	0.3048	3.97188	0.30486	1.81519	0.3062	4.06548	0.3048	-2.41225	0.30477	1.84115	0.30443	2.51711
0.30494	-0.57874	0.30496	3.96988	0.30503	1.81729	0.30637	4.05807	0.30497	-2.4118	0.30493	1.84184	0.30459	2.52273
0.30511	-0.57919	0.30513	3.96856	0.30519	1.81926	0.30654	4.05079	0.30513	-2.41069	0.3051	1.8425	0.30476	2.52787
0.30528	-0.57951	0.3053	3.96828	0.30536	1.82204	0.3067	4.0445	0.3053	-2.40966	0.30527	1.84232	0.30493	2.53206
0.30544	-0.57972	0.30546	3.96884	0.30553	1.8253	0.30687	4.03831	0.30547	-2.40908	0.30543	1.84213	0.30509	2.53512
0.30561	-0.57998	0.30563	3.96952	0.30569	1.82952	0.30704	4.03188	0.30563	-2.40862	0.3056	1.84169	0.30526	2.53855
0.30578	-0.5803	0.30579	3.97027	0.30586	1.83406	0.3072	4.02525	0.3058	-2.40848	0.30576	1.8408	0.30543	2.54289
0.30594	-0.58058	0.30596	3.97102	0.30603	1.83835	0.30737	4.01934	0.30597	-2.40857	0.30593	1.84079	0.30559	2.5474
0.30611	-0.58059	0.30613	3.97107	0.30619	1.84214	0.30754	4.01565	0.30613	-2.40875	0.3061	1.84209	0.30576	2.55124
0.30628	-0.5803	0.30629	3.97089	0.30636	1.84557	0.3077	4.01501	0.3063	-2.40897	0.30626	1.84334	0.30592	2.55476
0.30644	-0.57913	0.30646	3.96993	0.30652	1.84854	0.30787	4.01811	0.30647	-2.40927	0.30643	1.84426	0.30609	2.55796
0.30661	-0.57762	0.30663	3.96692	0.30669	1.85127	0.30804	4.02508	0.30663	-2.41022	0.3066	1.84493	0.30626	2.56087
0.30677	-0.57685	0.30679	3.96399	0.30686	1.85331	0.3082	4.03082	0.3068	-2.41129	0.30676	1.84373	0.30642	2.56309
0.30694	-0.57699	0.30696	3.96203	0.30702	1.85419	0.30837	4.03262	0.30697	-2.41229	0.30693	1.84211	0.30659	2.56431
0.30711	-0.57833	0.30713	3.96021	0.30719	1.85426	0.30853	4.03398	0.30713	-2.41333	0.3071	1.84039	0.30676	2.56521
0.30727	-0.5806	0.30729	3.96018	0.30736	1.85369	0.3087	4.03677	0.3073	-2.41388	0.30726	1.83851	0.30692	2.56506
0.30744	-0.58306	0.30746	3.96123	0.30752	1.85259	0.30887	4.0401	0.30746	-2.41392	0.30743	1.83692	0.30709	2.5644
0.30761	-0.58579	0.30763	3.96157	0.30769	1.85147	0.30903	4.04507	0.30763	-2.41382	0.3076	1.83622	0.30726	2.56434
0.30777	-0.58871	0.30779	3.96139	0.30786	1.85157	0.3092	4.05239	0.3078	-2.41367	0.30776	1.83551	0.30742	2.56471
0.30794	-0.58978	0.30796	3.96101	0.30802	1.85211	0.30937	4.05717	0.30796	-2.41351	0.30793	1.83444	0.30759	2.56571
0.30811	-0.59041	0.30813	3.95937	0.30819	1.85186	0.30953	4.05805	0.30813	-2.41403	0.30809	1.83313	0.30776	2.56768
0.30827	-0.59092	0.30829	3.95772	0.30836	1.851	0.3097	4.05732	0.3083	-2.41474	0.30826	1.83191	0.30792	2.5692
0.30844	-0.59113	0.30846	3.95733	0.30852	1.84985	0.30987	4.05141	0.30846	-2.41503	0.30843	1.83075	0.30809	2.5696
0.30861	-0.59155	0.30862	3.95711	0.30869	1.84798	0.31003	4.04355	0.30863	-2.41522	0.30859	1.82956	0.30825	2.56976
0.30877	-0.59248	0.30879	3.95719	0.30886	1.8457	0.3102	4.03836	0.3088	-2.41556	0.30876	1.82815	0.30842	2.56987
0.30894	-0.59351	0.30896	3.95776	0.30902	1.8437	0.31037	4.0344	0.30896	-2.41631	0.30893	1.82661	0.30859	2.57
0.30911	-0.59443	0.30912	3.95779	0.30919	1.84187	0.31053	4.03376	0.30913	-2.41738	0.30909	1.82409	0.30875	2.57046
0.30927	-0.59524	0.30929	3.95712	0.30936	1.84039	0.3107	4.04065	0.3093	-2.41914	0.30926	1.82166	0.30892	2.57123
0.30944	-0.59623	0.30946	3.95636	0.30952	1.83938	0.31087	4.04704	0.30946	-2.42093	0.30943	1.81895	0.30909	2.57207
0.3096	-0.59731	0.30962	3.95594	0.30969	1.83797	0.31103	4.05246	0.30963	-2.42225	0.30959	1.81597	0.30925	2.57308
0.30977	-0.59843	0.30979	3.95564	0.30985	1.83585	0.3112	4.05713	0.3098	-2.42328	0.30976	1.81322	0.30942	2.57371
0.30994	-0.60119	0.30996	3.95529	0.31002	1.83322	0.31137	4.05864	0.30996	-2.42391	0.30993	1.81093	0.30959	2.57345
0.3101	-0.60443	0.31012	3.95492	0.31019	1.82876	0.31153	4.05666	0.31013	-2.42434	0.31009	1.80873	0.30975	2.57282
0.31027	-0.60799	0.31029	3.95429	0.31035	1.82293	0.3117	4.05213	0.31029	-2.42471	0.31026	1.80728	0.30992	2.57232
0.31044	-0.6115	0.31046	3.95272	0.31052	1.81748	0.31186	4.04525	0.31046	-2.42456	0.31042	1.80616	0.31009	2.572
0.3106	-0.61547	0.31062	3.95191	0.31069	1.81234	0.31203	4.04041	0.31063	-2.42428	0.31059	1.80536	0.31025	2.57199
0.31077	-0.61992	0.31079	3.95321	0.31085	1.80762	0.3122	4.03997	0.31079	-2.42333	0.31076	1.80469	0.31042	2.57229
0.31094	-0.62371	0.31095	3.95461	0.31102	1.80358	0.31236	4.04222	0.31096	-2.4223	0.31092	1.80381	0.31058	2.57258
0.3111	-0.62683	0.31112	3.95828	0.31119	1.80066	0.31253	4.04797	0.31113	-2.42094	0.31109	1.80187	0.31075	2.57288
0.31127	-0.62961	0.31129	3.96368	0.31135	1.79916	0.3127	4.05426	0.31129	-2.41928	0.31126	1.79993	0.31092	2.57358
0.31144	-0.63297	0.31145	3.96704	0.31152	1.7982	0.31286	4.05723	0.31146	-2.41805	0.31142	1.79823	0.31108	2.57531
0.3116	-0.63657	0.31162	3.96953	0.31169	1.79829	0.31303	4.05484	0.31163	-2.41736	0.31159	1.79657	0.31125	2.57771
0.31177	-0.63988	0.31179	3.97181	0.31185	1.79935	0.3132	4.05059	0.31179	-2.41672	0.31176	1.79507	0.31142	2.58073
0.31193	-0.64289	0.31195	3.97182	0.31202	1.79945	0.31336	4.04408	0.31196	-2.4156	0.31192	1.79387	0.31158	2.58467
0.3121	-0.64559	0.31212	3.97171	0.31219	1.79865	0.31353	4.03938	0.31213	-2.41442	0.31209	1.793	0.31175	2.58828
0.31227	-0.64627	0.31229	3.97294	0.31235	1.79757	0.3137	4.04039	0.31229	-2.41249	0.31226	1.79238	0.31192	2.59106
0.31243	-0.6467	0.31245	3.9743	0.31252	1.79555	0.31386	4.04719	0.31246	-2.41037	0.31242	1.79161	0.31208	2.59359
0.3126	-0.64745	0.31262	3.97648	0.31269	1.79321	0.31403	4.05891	0.31262	-2.40874	0.31259	1.78991	0.31225	2.59509
0.31277	-0.64821	0.31279	3.98011	0.31285	1.79167	0.3142	4.07287	0.31279	-2.40885	0.31275	1.78806	0.31242	2.59558
0.31293	-0.64937	0.31295	3.98333	0.31302	1.79052	0.31436	4.08897	0.31296	-2.40892	0.31292	1.78645	0.31258	2.59611
0.3131	-0.65078	0.31312	3.98614	0.31318	1.78891	0.31453	4.10913	0.31312	-2.40858	0.31309	1.78494	0.31275	2.59669
0.31327	-0.65235	0.31328	3.98883	0.31335	1.78676	0.3147	4.12564	0.31329	-2.40822	0.31325	1.78415	0.31291	2.5979
0.31343	-0.65418	0.31345	3.98967	0.31352	1.78408	0.31486	4.13549	0.31346	-2.40706	0.31342	1.78488	0.31308	2.60075
0.3136	-0.65586	0.31362	3.98994	0.31368	1.78095	0.31503	4.14584	0.31362	-2.40531	0.31359	1.78582	0.31325	2.60462
0.31377	-0.65855	0.31378	3.98984	0.31385	1.77773	0.31519	4.15854	0.31379	-2.40411	0.31375	1.78708	0.31341	2.60824
0.31393	-0.66126	0.31395	3.98962	0.31402	1.77452	0.31536	4.17412	0.31396	-2.40315	0.31392	1.78837	0.31358	2.61172
0.3141	-0.66215	0.31412	3.98953	0.31418	1.77173	0.31553	4.19326	0.31412	-2.40223	0.31409	1.7897	0.31375	2.61554
0.31426	-0.66287	0.31428	3.98993	0.31435	1.77085	0.31569	4.21525	0.31429	-2.40109	0.31425	1.79089	0.31391	2.61975
0.31443	-0.66387	0.31445	3.99059	0.31452	1.77127	0.31586	4.2395	0.31446	-2.39998	0.31442	1.79139	0.31408	2.62377
0.3146	-0.66528	0.31462	3.99226	0.31468	1.77195	0.31603	4.26818	0.31462	-2.39942	0.31459	1.79162	0.31425	2.62763
0.31476	-0.6664	0.31478	3.99399	0.31485	1.7732	0.31619	4.29639	0.31479	-2.39888	0.31475	1.79182	0.31441	2.63164
0.31493	-0.66689	0.31495	3.99549	0.31502	1.77421	0.31636	4.32066	0.31496	-2.39784	0.31492	1.79149	0.31458	2.63672
0.3151	-0.66728	0.31512	3.99691	0.31518	1.77455	0.31653	4.34366	0.31512	-2.39615	0.31508	1.79116	0.31475	2.64245
0.31526	-0.6665	0.31528	3.99596	0.31535	1.77467	0.31669	4.36475	0.31529	-2.39464	0.31525	1.7918	0.31491	2.64821
0.31543	-0.66527	0.31545	3.9934	0.31552	1.77523	0.31686	4.38421	0.31545	-2.39359	0.31542	1.79262	0.31508	2.65391
0.3156	-0.6635	0.31561	3.99093	0.31568	1.77617	0.31703	4.40807	0.31562	-2.39245	0.31558	1.79397	0.31524	2.65934
0.31576	-0.66156	0.31578	3.98852	0.31585	1.77596	0.31719	4.43649	0.31579	-2.39146	0.31575	1.7964	0.31541	2.66428
0.31593	-0.65996	0.31595	3.98613	0.31602	1.77497	0.31736	4.46208	0.31595	-2.39053	0.31592	1.79982	0.31558	2.66844
0.3161	-0.66006	0.31611	3.98635	0.31618	1.77396	0.31753	4.48246	0.31612	-2.39006	0.31608	1.8031	0.31574	2.67173
0.31626	-0.6608	0.31628	3.98661	0.31635	1.77288	0.31769	4.49698	0.31629	-2.38967	0.31625	1.80626	0.31591	2.67459
0.31643	-0.66374	0.31645	3.98676	0.31651	1.77212	0.31786	4.50618	0.31645	-2.38936	0.31642	1.80944	0.31608	2.67682
0.3166	-0.6669	0.31661	3.98671	0.31668	1.77237	0.31802	4.51232	0.31662	-2.38941	0.31658	1.81114	0.31624	2.67859
0.31676	-0.66884	0.31678	3.98583	0.31685	1.7731	0.31819	4.51604	0.31679	-2.38896	0.31675	1.81239	0.31641	2.68162
0.31693	-0.66999	0.31695	3.98348	0.31701	1.77407	0.31836	4.51672	0.31695	-2.38668	0.31692	1.81452	0.31658	2.68561
0.31709	-0.67072	0.31711	3.98122	0.31718	1.77532	0.31852	4.51439	0.31712	-2.38449	0.31708	1.81704	0.31674	2.69038
0.31726	-0.67119	0.31728	3.97932	0.31735	1.77716	0.31869	4.5084	0.31729	-2.38281	0.31725	1.81973	0.31691	2.69719
0.31743	-0.67162	0.31745	3.97748	0.31751	1.77947	0.31886	4.50347	0.31745	-2.38162	0.31742	1.82309	0.31708	2.70423
0.31759	-0.67199	0.31761	3.97766	0.31768	1.78193	0.31902	4.5028	0.31762	-2.38125	0.31758	1.82611	0.31724	2.7094
0.31776	-0.67236	0.31778	3.97834	0.31785	1.78482	0.31919	4.50459	0.31778	-2.38142	0.31775	1.82748	0.31741	2.71385
0.31793	-0.67168	0.31795	3.97922	0.31801	1.78796	0.31936	4.50397	0.31795	-2.38161	0.31791	1.82862	0.31757	2.71649
0.31809	-0.67098	0.31811	3.98102	0.31818	1.79118	0.31952	4.50148	0.31812	-2.3824	0.31808	1.8291	0.31774	2.7174
0.31826	-0.67058	0.31828	3.98252	0.31835	1.79435	0.31969	4.50192	0.31828	-2.38321	0.31825	1.82906	0.31791	2.71768
0.31843	-0.67064	0.31844	3.98368	0.31851	1.79735	0.31986	4.50687	0.31845	-2.38424	0.31841	1.82891	0.31807	2.71766
0.31859	-0.67042	0.31861	3.98475	0.31868	1.79996	0.32002	4.51001	0.31862	-2.38523	0.31858	1.82874	0.31824	2.71808
0.31876	-0.66969	0.31878	3.98525	0.31885	1.80224	0.32019	4.50851	0.31878	-2.38588	0.31875	1.82856	0.31841	2.72079
0.31893	-0.66904	0.31894	3.98542	0.31901	1.8039	0.32036	4.50558	0.31895	-2.38602	0.31891	1.82873	0.31857	2.72446
0.31909	-0.66847	0.31911	3.98575	0.31918	1.80533	0.32052	4.49331	0.31912	-2.3867	0.31908	1.82895	0.31874	2.72705
0.31926	-0.66797	0.31928	3.98619	0.31934	1.80634	0.32069	4.47175	0.31928	-2.38805	0.31925	1.8297	0.31891	2.72906
0.31942	-0.6688	0.31944	3.98663	0.31951	1.80693	0.32086	4.45188	0.31945	-2.38936	0.31941	1.83053	0.31907	2.73033
0.31959	-0.66992	0.31961	3.98705	0.31968	1.80694	0.32102	4.4336	0.31962	-2.39018	0.31958	1.83135	0.31924	2.73064
0.31976	-0.67067	0.31978	3.98746	0.31984	1.8066	0.32119	4.41727	0.31978	-2.39092	0.31975	1.8322	0.31941	2.73099
0.31992	-0.66995	0.31994	3.98774	0.32001	1.80627	0.32135	4.40564	0.31995	-2.3915	0.31991	1.83197	0.31957	2.73176
0.32009	-0.6688	0.32011	3.98799	0.32018	1.80672	0.32152	4.39917	0.32012	-2.39208	0.32008	1.83001	0.31974	2.73267
0.32026	-0.66582	0.32028	3.98796	0.32034	1.80754	0.32169	4.39809	0.32028	-2.39267	0.32024	1.82791	0.3199	2.73491
0.32042	-0.6628	0.32044	3.98756	0.32051	1.80841	0.32185	4.3996	0.32045	-2.39333	0.32041	1.82548	0.32007	2.73784
0.32059	-0.65881	0.32061	3.98725	0.32068	1.8093	0.32202	4.39833	0.32061	-2.39386	0.32058	1.82294	0.32024	2.74152
0.32076	-0.65411	0.32077	3.98711	0.32084	1.80933	0.32219	4.3938	0.32078	-2.39406	0.32074	1.82202	0.3204	2.74553
0.32092	-0.65055	0.32094	3.98708	0.32101	1.80813	0.32235	4.39154	0.32095	-2.39432	0.32091	1.8216	0.32057	2.749
0.32109	-0.64765	0.32111	3.98812	0.32118	1.80627	0.32252	4.39188	0.32111	-2.39518	0.32108	1.8211	0.32074	2.75124
0.32126	-0.64487	0.32127	3.98942	0.32134	1.80408	0.32269	4.39415	0.32128	-2.39649	0.32124	1.8196	0.3209	2.75199
0.32142	-0.64359	0.32144	3.99035	0.32151	1.80191	0.32285	4.40424	0.32145	-2.39715	0.32141	1.81785	0.32107	2.75071
0.32159	-0.64231	0.32161	3.99119	0.32168	1.79983	0.32302	4.41793	0.32161	-2.39742	0.32158	1.81543	0.32124	2.74861
0.32175	-0.64105	0.32177	3.99193	0.32184	1.79769	0.32319	4.42759	0.32178	-2.39777	0.32174	1.813	0.3214	2.74598
0.32192	-0.63986	0.32194	3.99224	0.32201	1.795	0.32335	4.43445	0.32195	-2.39901	0.32191	1.81141	0.32157	2.74289
0.32209	-0.63911	0.32211	3.99227	0.32218	1.7922	0.32352	4.4392	0.32211	-2.40022	0.32208	1.81179	0.32174	2.74166
0.32225	-0.63894	0.32227	3.99156	0.32234	1.79066	0.32369	4.44103	0.32228	-2.40087	0.32224	1.81301	0.3219	2.74202
0.32242	-0.63847	0.32244	3.99071	0.32251	1.79258	0.32385	4.4385	0.32245	-2.40145	0.32241	1.81472	0.32207	2.74257
0.32259	-0.63753	0.32261	3.98892	0.32267	1.79589	0.32402	4.4317	0.32261	-2.40156	0.32257	1.81645	0.32223	2.74221
0.32275	-0.63661	0.32277	3.98623	0.32284	1.79954	0.32419	4.42359	0.32278	-2.40077	0.32274	1.81691	0.3224	2.7409
0.32292	-0.63597	0.32294	3.98413	0.32301	1.80324	0.32435	4.41148	0.32295	-2.40041	0.32291	1.81677	0.32257	2.7372
0.32309	-0.63536	0.3231	3.98242	0.32317	1.80521	0.32452	4.39639	0.32311	-2.40052	0.32307	1.81622	0.32273	2.73235
0.32325	-0.63462	0.32327	3.98105	0.32334	1.8058	0.32468	4.39269	0.32328	-2.40084	0.32324	1.81567	0.3229	2.72738
0.32342	-0.63385	0.32344	3.98224	0.32351	1.80663	0.32485	4.39665	0.32344	-2.40267	0.32341	1.81518	0.32307	2.72195
0.32359	-0.63329	0.3236	3.98381	0.32367	1.80784	0.32502	4.40192	0.32361	-2.40528	0.32357	1.8152	0.32323	2.71728
0.32375	-0.63349	0.32377	3.9853	0.32384	1.80911	0.32518	4.40991	0.32378	-2.40844	0.32374	1.81524	0.3234	2.71339
0.32392	-0.63416	0.32394	3.98679	0.32401	1.81014	0.32535	4.4169	0.32394	-2.41156	0.32391	1.81525	0.32357	2.70989
0.32409	-0.63622	0.3241	3.98797	0.32417	1.81099	0.32552	4.4194	0.32411	-2.41532	0.32407	1.81527	0.32373	2.70507
0.32425	-0.63813	0.32427	3.98875	0.32434	1.81099	0.32568	4.41977	0.32428	-2.4204	0.32424	1.81518	0.3239	2.69945
0.32442	-0.63854	0.32444	3.98979	0.32451	1.81074	0.32585	4.42347	0.32444	-2.42545	0.32441	1.81499	0.32407	2.69249
0.32458	-0.6381	0.3246	3.99123	0.32467	1.81074	0.32602	4.43142	0.32461	-2.43039	0.32457	1.81509	0.32423	2.68459
0.32475	-0.63873	0.32477	3.99261	0.32484	1.81105	0.32618	4.44386	0.32478	-2.43515	0.32474	1.81534	0.3244	2.67788
0.32492	-0.64001	0.32494	3.99366	0.32501	1.81243	0.32635	4.45962	0.32494	-2.43964	0.3249	1.81558	0.32456	2.67373
0.32508	-0.64141	0.3251	3.99442	0.32517	1.81501	0.32652	4.47588	0.32511	-2.44341	0.32507	1.81567	0.32473	2.67092
0.32525	-0.64421	0.32527	3.99409	0.32534	1.81781	0.32668	4.49236	0.32528	-2.44657	0.32524	1.81586	0.3249	2.66932
0.32542	-0.64677	0.32543	3.99361	0.32551	1.8211	0.32685	4.5079	0.32544	-2.44942	0.3254	1.81713	0.32506	2.66814
0.32558	-0.64796	0.3256	3.99336	0.32567	1.82459	0.32702	4.51485	0.32561	-2.45225	0.32557	1.81838	0.32523	2.66558
0.32575	-0.64915	0.32577	3.99401	0.32584	1.82814	0.32718	4.51716	0.32577	-2.45538	0.32574	1.81951	0.3254	2.66185
0.32592	-0.65075	0.32593	3.99478	0.326	1.83158	0.32735	4.5173	0.32594	-2.45844	0.3259	1.82027	0.32556	2.65849
0.32608	-0.65265	0.3261	3.99588	0.32617	1.8353	0.32752	4.51281	0.32611	-2.46078	0.32607	1.82018	0.32573	2.6556
0.32625	-0.65406	0.32627	3.997	0.32634	1.83948	0.32768	4.50891	0.32627	-2.46308	0.32624	1.81796	0.3259	2.65275
0.32642	-0.65493	0.32643	3.99797	0.3265	1.84223	0.32785	4.50773	0.32644	-2.46607	0.3264	1.81581	0.32606	2.64889
0.32658	-0.65575	0.3266	3.99903	0.32667	1.8415	0.32801	4.50742	0.32661	-2.47016	0.32657	1.81405	0.32623	2.64454
0.32675	-0.65606	0.32677	4.00097	0.32684	1.83993	0.32818	4.5127	0.32677	-2.47479	0.32674	1.81248	0.3264	2.64141
0.32691	-0.6562	0.32693	4.00391	0.327	1.83827	0.32835	4.52283	0.32694	-2.48039	0.3269	1.81222	0.32656	2.63861
0.32708	-0.6561	0.3271	4.00651	0.32717	1.8366	0.32851	4.53806	0.32711	-2.4856	0.32707	1.81252	0.32673	2.63568
0.32725	-0.65592	0.32727	4.00834	0.32734	1.83681	0.32868	4.55597	0.32727	-2.48961	0.32723	1.81296	0.32689	2.63247
0.32741	-0.6554	0.32743	4.00946	0.3275	1.83832	0.32885	4.57552	0.32744	-2.49274	0.3274	1.81411	0.32706	2.62948
0.32758	-0.65414	0.3276	4.00818	0.32767	1.83993	0.32901	4.6037	0.32761	-2.49433	0.32757	1.81519	0.32723	2.62697
0.32775	-0.65267	0.32777	4.00666	0.32784	1.8425	0.32918	4.63533	0.32777	-2.49533	0.32773	1.81575	0.32739	2.62449
0.32791	-0.6504	0.32793	4.00516	0.328	1.84512	0.32935	4.66415	0.32794	-2.49673	0.3279	1.81634	0.32756	2.62588
0.32808	-0.64831	0.3281	4.00368	0.32817	1.84805	0.32951	4.69183	0.32811	-2.49931	0.32807	1.81762	0.32773	2.6289
0.32825	-0.64704	0.32826	4.00253	0.32834	1.85114	0.32968	4.71533	0.32827	-2.50135	0.32823	1.81955	0.32789	2.63345
0.32841	-0.64652	0.32843	4.00175	0.3285	1.85364	0.32985	4.73397	0.32844	-2.50201	0.3284	1.82156	0.32806	2.63869
0.32858	-0.6475	0.3286	4.00129	0.32867	1.85556	0.33001	4.74751	0.3286	-2.50247	0.32857	1.82367	0.32823	2.64374
0.32875	-0.64927	0.32876	4.00188	0.32884	1.8571	0.33018	4.75678	0.32877	-2.50192	0.32873	1.82571	0.32839	2.64841
0.32891	-0.65151	0.32893	4.00318	0.329	1.8583	0.33035	4.76489	0.32894	-2.50064	0.3289	1.82575	0.32856	2.65204
0.32908	-0.6554	0.3291	4.00474	0.32917	1.85939	0.33051	4.76979	0.3291	-2.49993	0.32907	1.82558	0.32873	2.65317
0.32924	-0.65899	0.32926	4.00647	0.32933	1.85897	0.33068	4.77326	0.32927	-2.49967	0.32923	1.82555	0.32889	2.65359
0.32941	-0.66149	0.32943	4.00724	0.3295	1.85787	0.33085	4.77601	0.32944	-2.49932	0.3294	1.82552	0.32906	2.65348
0.32958	-0.66363	0.3296	4.00555	0.32967	1.85627	0.33101	4.77844	0.3296	-2.49865	0.32956	1.8253	0.32922	2.65299
0.32974	-0.66392	0.32976	4.0035	0.32983	1.85449	0.33118	4.78096	0.32977	-2.49786	0.32973	1.8247	0.32939	2.654
0.32991	-0.66209	0.32993	4.00063	0.33	1.85281	0.33134	4.78354	0.32994	-2.4968	0.3299	1.82426	0.32956	2.65596
0.33008	-0.65993	0.3301	3.99768	0.33017	1.85163	0.33151	4.78852	0.3301	-2.49569	0.33006	1.82414	0.32972	2.65815
0.33024	-0.65745	0.33026	3.9948	0.33033	1.85033	0.33168	4.79807	0.33027	-2.49465	0.33023	1.82396	0.32989	2.65993
0.33041	-0.65504	0.33043	3.99206	0.3305	1.84843	0.33184	4.80943	0.33044	-2.49357	0.3304	1.82346	0.33006	2.6618
0.33058	-0.65304	0.33059	3.98948	0.33067	1.84645	0.33201	4.82042	0.3306	-2.49165	0.33056	1.82275	0.33022	2.66492
0.33074	-0.65133	0.33076	3.98701	0.33083	1.84338	0.33218	4.83079	0.33077	-2.48891	0.33073	1.82167	0.33039	2.66823
0.33091	-0.65006	0.33093	3.98387	0.331	1.83961	0.33234	4.8345	0.33093	-2.4861	0.3309	1.82047	0.33056	2.6719
0.33108	-0.64897	0.33109	3.97915	0.33117	1.83599	0.33251	4.8343	0.3311	-2.48319	0.33106	1.81966	0.33072	2.67606
0.33124	-0.64847	0.33126	3.97409	0.33133	1.83232	0.33268	4.83355	0.33127	-2.4808	0.33123	1.82053	0.33089	2.68058
0.33141	-0.64962	0.33143	3.96977	0.3315	1.82851	0.33284	4.83324	0.33143	-2.47962	0.3314	1.82124	0.33106	2.68533
0.33158	-0.65114	0.33159	3.96556	0.33167	1.82616	0.33301	4.83091	0.3316	-2.47899	0.33156	1.82124	0.33122	2.69011
0.33174	-0.65336	0.33176	3.96187	0.33183	1.82376	0.33318	4.81927	0.33177	-2.47932	0.33173	1.82125	0.33139	2.6931
0.33191	-0.65548	0.33193	3.95915	0.332	1.82051	0.33334	4.80425	0.33193	-2.48152	0.33189	1.82134	0.33155	2.69546
0.33207	-0.65713	0.33209	3.95635	0.33217	1.81718	0.33351	4.78835	0.3321	-2.48328	0.33206	1.82142	0.33172	2.69345
[truncated: 16,033 more rows]

## Sheet: Figure. S1K
fluorescence intensity distribution						Gaussian fit
dimer		monomer				dimer		monomer
intensity (A.U.)	probability	intensity (A.U.)	probability			intensity (A.U.)	probability	intensity (A.U.)	probability
25	0	15	0			25	0.0038	15	0.00194
75	0	45	0			34.596	0.00393	19.8485	0.00195
125	0	75	0			44.1919	0.00412	24.697	0.00196
175	0.02358	105	0			53.7879	0.00442	29.5454	0.00198
225	0.17682	135	0.08563			63.3838	0.00486	34.3939	0.00201
275	0.2554	165	0.22936			72.9798	0.00552	39.2424	0.00205
325	0.22593	195	0.29358			82.5758	0.00647	44.0909	0.00212
375	0.14538	225	0.21407			92.1717	0.00783	48.9394	0.00223
425	0.08448	255	0.10398			101.768	0.00972	53.7879	0.0024
475	0.03536	285	0.04281			111.364	0.0123	58.6364	0.00266
525	0.01768	315	0.01529			120.96	0.01576	63.4849	0.00303
575	0.01965	345	0.01223			130.556	0.02029	68.3333	0.00357
625	0.00786	375	0.00306			140.152	0.02613	73.1818	0.00434
675	0.00393	405	0			149.747	0.03348	78.0303	0.00543
725	0.00196	435	0			159.343	0.04254	82.8788	0.00692
775	0	465	0			168.939	0.05348	87.7273	0.00896
825	0.00196	495	0			178.535	0.06638	92.5758	0.01167
875	0					188.131	0.08124	97.4242	0.01523
925	0					197.727	0.09797	102.273	0.01982
975	0					207.323	0.11631	107.121	0.02564
						216.919	0.13588	111.97	0.03288
						226.515	0.15617	116.818	0.04174
						236.111	0.17652	121.667	0.05238
						245.707	0.19619	126.515	0.06491
						255.303	0.21438	131.364	0.07938
						264.899	0.2303	136.212	0.09577
						274.495	0.24319	141.061	0.11393
						284.091	0.25243	145.909	0.13362
						293.687	0.25756	150.758	0.15447
						303.283	0.2583	155.606	0.17599
						312.879	0.25462	160.455	0.1976
						322.475	0.2467	165.303	0.21862
						332.071	0.23496	170.152	0.23834
						341.667	0.21998	175	0.25602
						351.263	0.20246	179.848	0.27096
						360.859	0.18319	184.697	0.28255
						370.455	0.16298	189.545	0.29028
						380.051	0.1426	194.394	0.29383
						389.646	0.12272	199.242	0.29303
						399.242	0.10392	204.091	0.28791
						408.838	0.08662	208.939	0.27871
						418.434	0.07112	213.788	0.26583
						428.03	0.05756	218.636	0.24981
						437.626	0.04597	223.485	0.2313
						447.222	0.0363	228.333	0.21101
						456.818	0.0284	233.182	0.18969
						466.414	0.02208	238.03	0.16804
						476.01	0.01714	242.879	0.1467
						485.606	0.01334	247.727	0.12623
						495.202	0.01049	252.576	0.10707
						504.798	0.00839	257.424	0.08953
						514.394	0.00687	262.273	0.07384
						523.99	0.0058	267.121	0.06008
						533.586	0.00505	271.97	0.04826
						543.182	0.00454	276.818	0.03829
						552.778	0.0042	281.667	0.03004
						562.374	0.00398	286.515	0.02334
						571.97	0.00384	291.364	0.018
						581.566	0.00375	296.212	0.01381
						591.162	0.00369	301.061	0.01058
						600.758	0.00366	305.909	0.00814
						610.354	0.00364	310.758	0.00632
						619.949	0.00362	315.606	0.00499
						629.545	0.00362	320.455	0.00403
						639.141	0.00361	325.303	0.00335
						648.737	0.00361	330.152	0.00288
						658.333	0.00361	335	0.00255
						667.929	0.00361	339.848	0.00233
						677.525	0.00361	344.697	0.00219
						687.121	0.00361	349.545	0.00209
						696.717	0.00361	354.394	0.00203
						706.313	0.00361	359.242	0.00199
						715.909	0.00361	364.091	0.00197
						725.505	0.00361	368.939	0.00196
						735.101	0.00361	373.788	0.00195
						744.697	0.00361	378.636	0.00194
						754.293	0.00361	383.485	0.00194
						763.889	0.00361	388.333	0.00194
						773.485	0.00361	393.182	0.00194
						783.081	0.00361	398.03	0.00194
						792.677	0.00361	402.879	0.00193
						802.273	0.00361	407.727	0.00193
						811.869	0.00361	412.576	0.00193
						821.465	0.00361	417.424	0.00193
						831.061	0.00361	422.273	0.00193
						840.657	0.00361	427.121	0.00193
						850.253	0.00361	431.97	0.00193
						859.848	0.00361	436.818	0.00193
						869.444	0.00361	441.667	0.00193
						879.04	0.00361	446.515	0.00193
						888.636	0.00361	451.364	0.00193
						898.232	0.00361	456.212	0.00193
						907.828	0.00361	461.061	0.00193
						917.424	0.00361	465.909	0.00193
						927.02	0.00361	470.758	0.00193
						936.616	0.00361	475.606	0.00193
						946.212	0.00361	480.455	0.00193
						955.808	0.00361	485.303	0.00193
						965.404	0.00361	490.152	0.00193
						975	0.00361	495	0.00193

## Sheet: Figure.S1L
ATP		AMPPNP		ADP		APO
dwell time (s)	probability	dwell time (s)	probability	dwell time (s)	probability	dwell time (s)	probability
0.325	0.332642	1.05	0.458874	0.325	0.672783	0.625	0.422535
0.575	0.249741	2.75	0.242424	0.575	0.235474	1.475	0.197183
0.825	0.173057	4.45	0.0952381	0.825	0.0458716	2.325	0.197183
1.075	0.116062	6.15	0.0952381	1.075	0.0152905	3.175	0.028169
1.325	0.0507772	7.85	0.030303	1.325	0.0030581	4.025	0.056338
1.575	0.0176166	9.55	0.025974	1.575	0.00611621	4.875	0.0422535
1.825	0.0196891	11.25	0.017316	1.825	0.0030581	5.725	0.028169
2.075	0.0124352	12.95	0.004329	2.075	0.00611621	6.575	0
2.325	0.0103627	14.65	0.004329	2.325	0.0030581	7.425	0
2.575	0.00621762	16.35	0.00865801	2.575	0.0030581	8.275	0.0140845
2.825	0.00414508	18.05	0.00865801	2.825	0	9.125	0
3.075	0.00310881	19.75	0.004329	3.075	0.00611621	9.975	0
3.325	0.00310881	21.45	0.004329	3.325	0	10.825	0.0140845
3.575	0			3.575	0
3.825	0.00103627			3.825	0

## Sheet: Figure.S1M
growing rate (mm/min)						two-tailed Mann-Whitney U test with Bonferroni correction
ATP	AMPPNP	ADP	APO			ATP<->AMPPNP, p=0.58
0.6801	0.8135	0.29944	0.71767			ATP<->AMPPNP, p>1
0.61331	0.7146	0.735	1.04			ATP<->AMPPNP, p=0.22
0.672	0.83202	0.64787	0.86271
0.54572	0.80034	0.64	0.6
0.64097	0.91079	0.26301	0.82809
0.65581	0.87413	0.64245	0.57333
0.75733	0.9494	0.56965	0.59767
0.58008	0.88279	0.54815	0.95609
0.64706	0.6786	0.62264	0.81333
0.5066	0.896	0.37564	0.84667
0.55179	0.8685	0.36444	0.618
0.65595	0.56419	0.4834	0.47748
0.51567	0.80713	0.31914	0.63313
0.5266	0.8694	0.60362	0.78667
0.4934	0.5972	0.38442	0.42433
0.48219	0.40574	1.07629	0.69
0.80794	0.86431	1.06355	0.42667
0.53618	0.59364	0.96587	1.12934
0.6673	0.50196	0.99158	1.28941
0.59806	0.52958	0.9234	1.25795
0.32345	0.39407	0.74034	0.66667
0.7278	0.45093	1.00158	1.31613
0.6	0.40268	0.51892	0.86261
0.496	0.39993	0.52	0.59567
0.6614	0.6146		1.49567
0.493	0.4977		1.44667
0.63489	0.45402		1.02233
0.7146	0.42975		1.07233
0.53858	0.54798		1.24272
0.5539	0.43863		0.90514
0.624	0.5334		1.13333
0.69001	0.38464		1.14
0.5786	0.38514		0.88312
0.44316	0.28403		1.12014
0.7497	0.32843
0.6292	0.39049
1.12032	0.53859
1.08	0.37956
0.7145
1.24738
0.77686
0.636
1.18511
0.79447
0.9451
1.04724
0.73703
1.11883
0.88591
0.85164
0.87761
0.68108
1.04758
1.024
0.84934
0.84224
0.71127
