# Supplementary material for: MCAK recognizes the nucleotide-dependent feature at growing microtubule ends
Source: eLife journal article supplement (doi:10.7554/elife.92958), 2023-11-17
Supplement: fig1-figsupp1-data3 [file Figure 1-figure supplement 1-source data3.pdf › Figure 1-figure supplement 1-source data3/Figure 1-figure supplement 1-source data3.pdf]

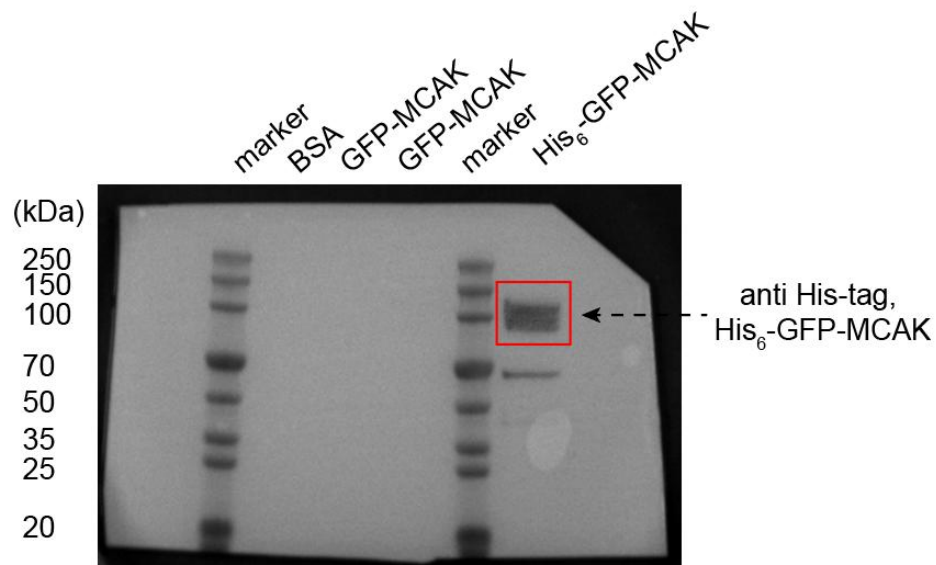

**Figure 1-figure supplement 1B.**

Detection of the His-tag by western blotting

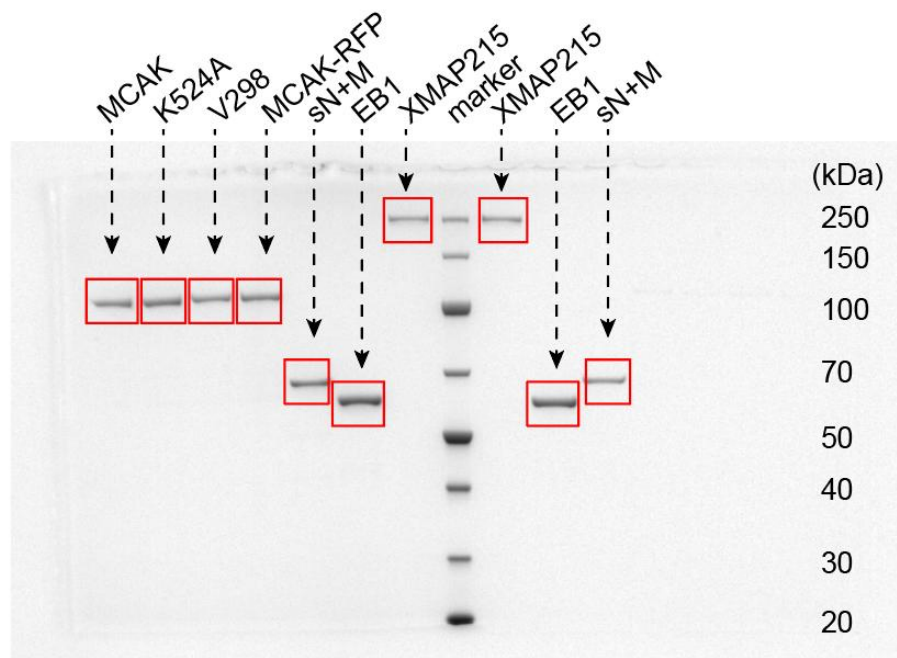

**Figure 1-figure supplement 1J.**

SDS-PAGE analysis of the proteins used in this study
