# Supplementary material for: MCAK recognizes the nucleotide-dependent feature at growing microtubule ends
Source: eLife journal article supplement (doi:10.7554/elife.92958), 2023-11-17
Supplement: fig1-figsupp2-data1 [file supplementary Figure2 source data1.xlsx]

## Sheet: Fig. s2B
Intensity profile				q	gaussian fit		half-Gaussian fit
position (nm)	GFP-MCAK	position (nm)	microtubule end		position (nm)	GFP-MCAK	position (nm)	microtubule end
-370	195.471	-400	6017		-370	226.986	-400	6106.94
-290	247.686	-320	6747		-368.879	226.986	-397.333	6106.94
-210	196.123	-240	6019		-367.758	226.986	-394.667	6106.94
-130	212.767	-160	6420		-366.637	226.986	-392	6106.94
-50	219.947	-80	6453		-365.516	226.986	-389.333	6106.94
30	356.033	0	6403		-364.394	226.986	-386.667	6106.94
110	528.018	80	5211		-363.273	226.986	-384	6106.94
190	355.381	160	4230		-362.152	226.986	-381.333	6106.94
270	262.045	240	3250		-361.031	226.986	-378.667	6106.94
350	235.285	320	3394		-359.91	226.986	-376	6106.94
430	302.512	400	2486		-358.789	226.986	-373.333	6106.94
510	202.65	480	3695		-357.668	226.986	-370.667	6106.94
590	216.683	560	2747		-356.547	226.986	-368	6106.94
670	240.507	640	3302		-355.425	226.986	-365.333	6106.94
750	215.378	720	3030		-354.304	226.986	-362.667	6106.94
					-353.183	226.986	-360	6106.94
					-352.062	226.986	-357.333	6106.94
					-350.941	226.986	-354.667	6106.94
					-349.82	226.986	-352	6106.94
					-348.699	226.986	-349.333	6106.94
					-347.578	226.986	-346.667	6106.94
					-346.456	226.986	-344	6106.94
					-345.335	226.986	-341.333	6106.94
					-344.214	226.986	-338.667	6106.94
					-343.093	226.986	-336	6106.94
					-341.972	226.986	-333.333	6106.94
					-340.851	226.986	-330.667	6106.94
					-339.73	226.986	-328	6106.94
					-338.609	226.986	-325.333	6106.94
					-337.487	226.986	-322.667	6106.94
					-336.366	226.986	-320	6106.94
					-335.245	226.986	-317.333	6106.94
					-334.124	226.986	-314.667	6106.94
					-333.003	226.986	-312	6106.94
					-331.882	226.986	-309.333	6106.94
					-330.761	226.986	-306.667	6106.94
					-329.64	226.986	-304	6106.94
					-328.519	226.986	-301.333	6106.94
					-327.397	226.986	-298.667	6106.94
					-326.276	226.986	-296	6106.94
					-325.155	226.986	-293.333	6106.94
					-324.034	226.986	-290.667	6106.94
					-322.913	226.986	-288	6106.94
					-321.792	226.986	-285.333	6106.94
					-320.671	226.986	-282.667	6106.94
					-319.55	226.986	-280	6106.94
					-318.428	226.986	-277.333	6106.94
					-317.307	226.986	-274.667	6106.94
					-316.186	226.986	-272	6106.94
					-315.065	226.986	-269.333	6106.94
					-313.944	226.986	-266.667	6106.94
					-312.823	226.986	-264	6106.94
					-311.702	226.986	-261.333	6106.94
					-310.581	226.986	-258.667	6106.94
					-309.459	226.986	-256	6106.94
					-308.338	226.986	-253.333	6106.94
					-307.217	226.986	-250.667	6106.94
					-306.096	226.986	-248	6106.94
					-304.975	226.986	-245.333	6106.94
					-303.854	226.986	-242.667	6106.94
					-302.733	226.986	-240	6106.94
					-301.612	226.986	-237.333	6106.94
					-300.49	226.986	-234.667	6106.94
					-299.369	226.986	-232	6106.94
					-298.248	226.986	-229.333	6106.94
					-297.127	226.986	-226.667	6106.94
					-296.006	226.986	-224	6106.94
					-294.885	226.986	-221.333	6106.94
					-293.764	226.986	-218.667	6106.94
					-292.643	226.986	-216	6106.94
					-291.522	226.986	-213.333	6106.94
					-290.4	226.986	-210.667	6106.94
					-290	226.986	-208	6106.94
					-289.279	226.986	-205.333	6106.94
					-288.158	226.986	-202.667	6106.94
					-287.037	226.986	-200	6106.94
					-285.916	226.986	-197.333	6106.94
					-284.795	226.986	-194.667	6106.94
					-283.674	226.986	-192	6106.94
					-282.553	226.986	-189.333	6106.94
					-281.431	226.986	-186.667	6106.94
					-280.31	226.986	-184	6106.94
					-279.189	226.986	-181.333	6106.94
					-278.068	226.986	-178.667	6106.94
					-276.947	226.986	-176	6106.94
					-275.826	226.986	-173.333	6106.94
					-274.705	226.986	-170.667	6106.94
					-273.584	226.986	-168	6106.94
					-272.462	226.986	-165.333	6106.94
					-271.341	226.986	-162.667	6106.94
					-270.22	226.986	-160	6106.94
					-269.099	226.986	-157.333	6106.94
					-267.978	226.986	-154.667	6106.94
					-266.857	226.986	-152	6106.94
					-265.736	226.986	-149.333	6106.94
					-264.615	226.986	-146.667	6106.94
					-263.493	226.986	-144	6106.94
					-262.372	226.986	-141.333	6106.94
					-261.251	226.986	-138.667	6106.94
					-260.13	226.986	-136	6106.94
					-259.009	226.986	-133.333	6106.94
					-257.888	226.986	-130.667	6106.94
					-256.767	226.986	-128	6106.94
					-255.646	226.986	-125.333	6106.94
					-254.525	226.986	-122.667	6106.94
					-253.403	226.986	-120	6106.94
					-252.282	226.986	-117.333	6106.94
					-251.161	226.986	-114.667	6106.94
					-250.04	226.986	-112	6106.94
					-248.919	226.986	-109.333	6106.94
					-247.798	226.986	-106.667	6106.94
					-246.677	226.986	-104	6106.94
					-245.556	226.986	-101.333	6106.94
					-244.434	226.986	-98.6667	6106.94
					-243.313	226.986	-96	6106.94
					-242.192	226.986	-93.3333	6106.94
					-241.071	226.986	-90.6667	6106.94
					-239.95	226.986	-88	6106.94
					-238.829	226.986	-85.3333	6106.94
					-237.708	226.986	-82.6667	6106.94
					-236.587	226.986	-80	6106.94
					-235.465	226.986	-77.3333	6106.94
					-234.344	226.986	-74.6667	6106.94
					-233.223	226.986	-72	6106.94
					-232.102	226.986	-69.3333	6106.94
					-230.981	226.986	-66.6667	6106.94
					-229.86	226.986	-64	6106.94
					-228.739	226.986	-61.3333	6106.94
					-227.618	226.986	-58.6667	6106.94
					-226.496	226.986	-56	6106.94
					-225.375	226.986	-53.3333	6106.94
					-224.254	226.986	-50.6667	6106.94
					-223.133	226.986	-48	6106.94
					-222.012	226.986	-45.3333	6106.94
					-220.891	226.986	-42.6667	6106.94
					-219.77	226.986	-40	6106.94
					-218.649	226.986	-37.3333	6106.94
					-217.528	226.986	-34.6667	6106.94
					-216.406	226.986	-32	6106.94
					-215.285	226.986	-29.3333	6106.94
					-214.164	226.986	-26.6667	6106.94
					-213.043	226.986	-24	6106.94
					-211.922	226.986	-21.3333	6106.94
					-210.801	226.986	-18.6667	6106.94
					-210	226.986	-16	6106.94
					-209.68	226.986	-13.3333	6106.94
					-208.559	226.986	-10.6667	6106.94
					-207.437	226.986	-8	6106.94
					-206.316	226.986	-5.33333	6106.94
					-205.195	226.986	-2.66667	6106.94
					-204.074	226.986	0	6106.94
					-202.953	226.986	2.66667	6106.32
					-201.832	226.986	5.33333	6104.46
					-200.711	226.987	8	6101.37
					-199.59	226.987	10.6667	6097.04
					-198.468	226.987	13.3333	6091.48
					-197.347	226.987	16	6084.71
					-196.226	226.987	18.6667	6076.72
					-195.105	226.987	21.3333	6067.52
					-193.984	226.987	24	6057.14
					-192.863	226.987	26.6667	6045.57
					-191.742	226.987	29.3333	6032.84
					-190.621	226.988	32	6018.97
					-189.5	226.988	34.6667	6003.95
					-188.378	226.988	37.3333	5987.82
					-187.257	226.988	40	5970.6
					-186.136	226.989	42.6667	5952.3
					-185.015	226.989	45.3333	5932.94
					-183.894	226.989	48	5912.56
					-182.773	226.989	50.6667	5891.16
					-181.652	226.99	53.3333	5868.79
					-180.531	226.99	56	5845.45
					-179.409	226.99	58.6667	5821.19
					-178.288	226.991	61.3333	5796.02
					-177.167	226.991	64	5769.99
					-176.046	226.992	66.6667	5743.1
					-174.925	226.992	69.3333	5715.4
					-173.804	226.993	72	5686.92
					-172.683	226.994	74.6667	5657.69
					-171.562	226.994	77.3333	5627.74
					-170.44	226.995	80	5597.1
					-169.319	226.996	82.6667	5565.8
					-168.198	226.997	85.3333	5533.89
					-167.077	226.998	88	5501.39
					-165.956	226.999	90.6667	5468.33
					-164.835	227	93.3333	5434.76
					-163.714	227.001	96	5400.7
					-162.593	227.002	98.6667	5366.19
					-161.471	227.004	101.333	5331.27
					-160.35	227.005	104	5295.96
					-159.229	227.007	106.667	5260.31
					-158.108	227.009	109.333	5224.34
					-156.987	227.011	112	5188.1
					-155.866	227.013	114.667	5151.61
					-154.745	227.015	117.333	5114.91
					-153.624	227.017	120	5078.04
					-152.502	227.02	122.667	5041.02
					-151.381	227.022	125.333	5003.88
					-150.26	227.025	128	4966.67
					-149.139	227.028	130.667	4929.41
					-148.018	227.032	133.333	4892.13
					-146.897	227.036	136	4854.87
					-145.776	227.039	138.667	4817.64
					-144.655	227.044	141.333	4780.49
					-143.534	227.048	144	4743.44
					-142.412	227.053	146.667	4706.52
					-141.291	227.058	149.333	4669.75
					-140.17	227.064	152	4633.16
					-139.049	227.07	154.667	4596.78
					-137.928	227.076	157.333	4560.63
					-136.807	227.083	160	4524.73
					-135.686	227.09	162.667	4489.11
					-134.565	227.098	165.333	4453.79
					-133.443	227.106	168	4418.79
					-132.322	227.115	170.667	4384.13
					-131.201	227.125	173.333	4349.83
					-130.08	227.135	176	4315.91
					-130	227.136	178.667	4282.38
					-128.959	227.146	181.333	4249.26
					-127.838	227.158	184	4216.57
					-126.717	227.17	186.667	4184.32
					-125.596	227.183	189.333	4152.52
					-124.474	227.198	192	4121.19
					-123.353	227.213	194.667	4090.34
					-122.232	227.229	197.333	4059.98
					-121.111	227.246	200	4030.12
					-119.99	227.264	202.667	4000.77
					-118.869	227.284	205.333	3971.94
					-117.748	227.305	208	3943.63
					-116.627	227.327	210.667	3915.85
					-115.506	227.35	213.333	3888.61
					-114.384	227.375	216	3861.9
					-113.263	227.402	218.667	3835.75
					-112.142	227.43	221.333	3810.14
					-111.021	227.46	224	3785.08
					-109.9	227.492	226.667	3760.57
					-108.779	227.525	229.333	3736.62
					-107.658	227.561	232	3713.22
					-106.537	227.599	234.667	3690.37
					-105.415	227.64	237.333	3668.07
					-104.294	227.682	240	3646.33
					-103.173	227.728	242.667	3625.13
					-102.052	227.776	245.333	3604.47
					-100.931	227.826	248	3584.36
					-99.8098	227.88	250.667	3564.79
					-98.6887	227.937	253.333	3545.75
					-97.5676	227.997	256	3527.23
					-96.4464	228.061	258.667	3509.24
					-95.3253	228.128	261.333	3491.77
					-94.2042	228.199	264	3474.81
					-93.0831	228.274	266.667	3458.35
					-91.962	228.354	269.333	3442.39
					-90.8408	228.437	272	3426.92
					-89.7197	228.525	274.667	3411.93
					-88.5986	228.619	277.333	3397.42
					-87.4775	228.717	280	3383.37
					-86.3564	228.82	282.667	3369.79
					-85.2352	228.929	285.333	3356.65
					-84.1141	229.044	288	3343.95
					-82.993	229.165	290.667	3331.69
					-81.8719	229.292	293.333	3319.85
					-80.7507	229.426	296	3308.43
					-79.6296	229.567	298.667	3297.41
					-78.5085	229.714	301.333	3286.79
					-77.3874	229.87	304	3276.56
					-76.2663	230.033	306.667	3266.7
					-75.1452	230.205	309.333	3257.21
					-74.024	230.385	312	3248.08
					-72.9029	230.574	314.667	3239.3
					-71.7818	230.772	317.333	3230.86
					-70.6607	230.98	320	3222.76
					-69.5395	231.198	322.667	3214.97
					-68.4184	231.426	325.333	3207.5
					-67.2973	231.665	328	3200.33
					-66.1762	231.916	330.667	3193.45
					-65.0551	232.178	333.333	3186.86
					-63.9339	232.452	336	3180.55
					-62.8128	232.739	338.667	3174.5
					-61.6917	233.039	341.333	3168.72
					-60.5706	233.352	344	3163.18
					-59.4494	233.68	346.667	3157.89
					-58.3283	234.022	349.333	3152.83
					-57.2072	234.379	352	3147.99
					-56.0861	234.752	354.667	3143.38
					-54.965	235.14	357.333	3138.97
					-53.8438	235.546	360	3134.77
					-52.7227	235.968	362.667	3130.76
					-51.6016	236.409	365.333	3126.94
					-50.4805	236.867	368	3123.3
					-50	237.07	370.667	3119.83
					-49.3594	237.345	373.333	3116.53
					-48.2382	237.842	376	3113.39
					-47.1171	238.359	378.667	3110.41
					-45.996	238.897	381.333	3107.57
					-44.8749	239.456	384	3104.88
					-43.7537	240.038	386.667	3102.32
					-42.6326	240.642	389.333	3099.89
					-41.5115	241.269	392	3097.58
					-40.3904	241.92	394.667	3095.4
					-39.2693	242.595	397.333	3093.32
					-38.1482	243.296	400	3091.36
					-37.027	244.023	402.667	3089.5
					-35.9059	244.776	405.333	3087.74
					-34.7848	245.556	408	3086.07
					-33.6637	246.364	410.667	3084.5
					-32.5425	247.201	413.333	3083.01
					-31.4214	248.067	416	3081.6
					-30.3003	248.963	418.667	3080.27
					-29.1792	249.889	421.333	3079.02
					-28.0581	250.847	424	3077.83
					-26.9369	251.836	426.667	3076.71
					-25.8158	252.858	429.333	3075.66
					-24.6947	253.913	432	3074.67
					-23.5736	255.002	434.667	3073.73
					-22.4524	256.125	437.333	3072.85
					-21.3313	257.284	440	3072.02
					-20.2102	258.478	442.667	3071.24
					-19.0891	259.709	445.333	3070.51
					-17.968	260.976	448	3069.82
					-16.8468	262.281	450.667	3069.17
					-15.7257	263.624	453.333	3068.57
					-14.6046	265.005	456	3067.99
					-13.4835	266.426	458.667	3067.46
					-12.3624	267.886	461.333	3066.96
					-11.2412	269.387	464	3066.49
					-10.1201	270.928	466.667	3066.05
					-8.999	272.51	469.333	3065.63
					-7.87788	274.133	472	3065.25
					-6.75676	275.799	474.667	3064.88
					-5.63564	277.506	477.333	3064.54
					-4.51451	279.257	480	3064.23
					-3.39339	281.05	482.667	3063.93
					-2.27227	282.886	485.333	3063.66
					-1.15115	284.765	488	3063.4
					-0.03003	286.689	490.667	3063.16
					1.09109	288.656	493.333	3062.93
					2.21221	290.666	496	3062.72
					3.33333	292.721	498.667	3062.53
					4.45445	294.82	501.333	3062.35
					5.57558	296.963	504	3062.18
					6.6967	299.149	506.667	3062.02
					7.81782	301.38	509.333	3061.87
					8.93894	303.654	512	3061.74
					10.0601	305.972	514.667	3061.61
					11.1812	308.333	517.333	3061.49
					12.3023	310.738	520	3061.38
					13.4234	313.185	522.667	3061.28
					14.5445	315.674	525.333	3061.19
					15.6657	318.205	528	3061.1
					16.7868	320.778	530.667	3061.02
					17.9079	323.392	533.333	3060.94
					19.029	326.046	536	3060.87
					20.1502	328.739	538.667	3060.81
					21.2713	331.472	541.333	3060.75
					22.3924	334.242	544	3060.69
					23.5135	337.05	546.667	3060.64
					24.6346	339.894	549.333	3060.59
					25.7558	342.774	552	3060.55
					26.8769	345.688	554.667	3060.51
					27.998	348.636	557.333	3060.47
					29.1191	351.615	560	3060.44
					30	353.978	562.667	3060.41
					30.2402	354.626	565.333	3060.38
					31.3614	357.667	568	3060.35
					32.4825	360.736	570.667	3060.33
					33.6036	363.832	573.333	3060.3
					34.7247	366.953	576	3060.28
					35.8458	370.099	578.667	3060.26
					36.967	373.268	581.333	3060.24
					38.0881	376.458	584	3060.23
					39.2092	379.667	586.667	3060.21
					40.3303	382.893	589.333	3060.2
					41.4515	386.136	592	3060.19
					42.5726	389.392	594.667	3060.17
					43.6937	392.661	597.333	3060.16
					44.8148	395.94	600	3060.15
					45.9359	399.228	602.667	3060.15
					47.0571	402.521	605.333	3060.14
					48.1782	405.819	608	3060.13
					49.2993	409.119	610.667	3060.12
					50.4204	412.419	613.333	3060.12
					51.5415	415.716	616	3060.11
					52.6627	419.01	618.667	3060.11
					53.7838	422.296	621.333	3060.1
					54.9049	425.573	624	3060.1
					56.026	428.84	626.667	3060.09
					57.1472	432.092	629.333	3060.09
					58.2683	435.328	632	3060.08
					59.3894	438.546	634.667	3060.08
					60.5105	441.743	637.333	3060.08
					61.6316	444.917	640	3060.08
					62.7527	448.065	642.667	3060.07
					63.8739	451.184	645.333	3060.07
					64.995	454.273	648	3060.07
					66.1161	457.329	650.667	3060.07
					67.2372	460.35	653.333	3060.07
					68.3584	463.332	656	3060.07
					69.4795	466.274	658.667	3060.06
					70.6006	469.172	661.333	3060.06
					71.7217	472.026	664	3060.06
					72.8428	474.831	666.667	3060.06
					73.964	477.586	669.333	3060.06
					75.0851	480.289	672	3060.06
					76.2062	482.937	674.667	3060.06
					77.3273	485.527	677.333	3060.06
					78.4484	488.058	680	3060.06
					79.5696	490.527	682.667	3060.06
					80.6907	492.931	685.333	3060.06
					81.8118	495.27	688	3060.06
					82.9329	497.54	690.667	3060.06
					84.0541	499.74	693.333	3060.05
					85.1752	501.868	696	3060.05
					86.2963	503.921	698.667	3060.05
					87.4174	505.897	701.333	3060.05
					88.5385	507.796	704	3060.05
					89.6597	509.614	706.667	3060.05
					90.7808	511.351	709.333	3060.05
					91.9019	513.005	712	3060.05
					93.023	514.573	714.667	3060.05
					94.1441	516.055	717.333	3060.05
					95.2653	517.45	720	3060.05
					96.3864	518.755
					97.5075	519.97
					98.6286	521.093
					99.7498	522.124
					100.871	523.061
					101.992	523.903
					103.113	524.65
					104.234	525.3
					105.355	525.854
					106.476	526.311
					107.598	526.669
					108.719	526.93
					109.84	527.092
					110	527.107
					110.961	527.156
					112.082	527.121
					113.203	526.987
					114.324	526.755
					115.445	526.425
					116.567	525.996
					117.688	525.471
					118.809	524.848
					119.93	524.129
					121.051	523.314
					122.172	522.405
					123.293	521.401
					124.414	520.305
					125.536	519.117
					126.657	517.837
					127.778	516.469
					128.899	515.012
					130.02	513.468
					131.141	511.839
					132.262	510.126
					133.383	508.331
					134.505	506.456
					135.626	504.501
					136.747	502.47
					137.868	500.364
					138.989	498.185
					140.11	495.935
					141.231	493.616
					142.352	491.23
					143.473	488.78
					144.595	486.267
					145.716	483.693
					146.837	481.062
					147.958	478.375
					149.079	475.635
					150.2	472.844
					151.321	470.004
					152.442	467.118
					153.564	464.189
					154.685	461.218
					155.806	458.209
					156.927	455.163
					158.048	452.083
					159.169	448.972
					160.29	445.832
					161.411	442.665
					162.533	439.475
					163.654	436.263
					164.775	433.032
					165.896	429.784
					167.017	426.521
					168.138	423.247
					169.259	419.963
					170.38	416.671
					171.501	413.375
					172.623	410.075
					173.744	406.775
					174.865	403.477
					175.986	400.182
					177.107	396.892
					178.228	393.611
					179.349	390.339
					180.47	387.078
					181.592	383.831
					182.713	380.6
					183.834	377.386
					184.955	374.19
					186.076	371.015
					187.197	367.863
					188.318	364.734
					189.439	361.63
					190	360.088
					190.561	358.553
					191.682	355.504
					192.803	352.485
					193.924	349.496
					195.045	346.539
					196.166	343.615
					197.287	340.725
					198.408	337.871
					199.53	335.052
					200.651	332.271
					201.772	329.527
					202.893	326.822
					204.014	324.157
					205.135	321.532
					206.256	318.947
					207.377	316.404
					208.499	313.902
					209.62	311.443
					210.741	309.026
					211.862	306.652
					212.983	304.322
					214.104	302.035
					215.225	299.791
					216.346	297.592
					217.467	295.436
					218.589	293.325
					219.71	291.257
					220.831	289.234
					221.952	287.254
					223.073	285.318
					224.194	283.426
					225.315	281.577
					226.436	279.772
					227.558	278.009
					228.679	276.289
					229.8	274.612
					230.921	272.976
					232.042	271.382
					233.163	269.829
					234.284	268.317
					235.405	266.845
					236.527	265.413
					237.648	264.02
					238.769	262.666
					239.89	261.35
					241.011	260.072
					242.132	258.831
					243.253	257.626
					244.374	256.458
					245.495	255.324
					246.617	254.225
					247.738	253.16
					248.859	252.129
					249.98	251.13
					251.101	250.163
					252.222	249.228
					253.343	248.324
					254.464	247.449
					255.586	246.604
					256.707	245.788
					257.828	244.999
					258.949	244.238
					260.07	243.504
					261.191	242.796
					262.312	242.113
					263.433	241.455
					264.555	240.821
					265.676	240.21
					266.797	239.623
					267.918	239.057
					269.039	238.513
					270	238.063
					270.16	237.99
					271.281	237.487
					272.402	237.004
					273.524	236.54
					274.645	236.094
					275.766	235.666
					276.887	235.256
					278.008	234.863
					279.129	234.485
					280.25	234.124
					281.371	233.777
					282.492	233.446
					283.614	233.128
					284.735	232.825
					285.856	232.534
					286.977	232.256
					288.098	231.991
					289.219	231.737
					290.34	231.494
					291.461	231.263
					292.583	231.042
					293.704	230.831
					294.825	230.63
					295.946	230.439
					297.067	230.256
					298.188	230.082
					299.309	229.916
					300.43	229.759
					301.552	229.609
					302.673	229.466
					303.794	229.33
					304.915	229.201
					306.036	229.078
					307.157	228.962
					308.278	228.851
					309.399	228.746
					310.521	228.646
					311.642	228.552
					312.763	228.462
					313.884	228.377
					315.005	228.297
					316.126	228.221
					317.247	228.148
					318.368	228.08
					319.489	228.015
					320.611	227.954
					321.732	227.896
					322.853	227.842
					323.974	227.79
					325.095	227.741
					326.216	227.695
					327.337	227.652
					328.458	227.611
					329.58	227.572
					330.701	227.536
					331.822	227.501
					332.943	227.469
					334.064	227.438
					335.185	227.41
					336.306	227.383
					337.427	227.357
					338.549	227.333
					339.67	227.311
					340.791	227.29
					341.912	227.27
					343.033	227.251
					344.154	227.234
					345.275	227.217
					346.396	227.202
					347.518	227.187
					348.639	227.174
					349.76	227.161
					350	227.159
					350.881	227.149
					352.002	227.138
					353.123	227.128
					354.244	227.118
					355.365	227.109
					356.486	227.1
					357.608	227.092
					358.729	227.085
					359.85	227.078
					360.971	227.071
					362.092	227.065
					363.213	227.06
					364.334	227.054
					365.455	227.049
					366.577	227.045
					367.698	227.041
					368.819	227.037
					369.94	227.033
					371.061	227.029
					372.182	227.026
					373.303	227.023
					374.424	227.02
					375.546	227.018
					376.667	227.015
					377.788	227.013
					378.909	227.011
					380.03	227.009
					381.151	227.007
					382.272	227.006
					383.393	227.004
					384.515	227.003
					385.636	227.001
					386.757	227
					387.878	226.999
					388.999	226.998
					390.12	226.997
					391.241	226.996
					392.362	226.995
					393.483	226.995
					394.605	226.994
					395.726	226.993
					396.847	226.993
					397.968	226.992
					399.089	226.992
					400.21	226.991
					401.331	226.991
					402.452	226.99
					403.574	226.99
					404.695	226.989
					405.816	226.989
					406.937	226.989
					408.058	226.989
					409.179	226.988
					410.3	226.988
					411.421	226.988
					412.543	226.988
					413.664	226.988
					414.785	226.987
					415.906	226.987
					417.027	226.987
					418.148	226.987
					419.269	226.987
					420.39	226.987
					421.512	226.987
					422.633	226.987
					423.754	226.986
					424.875	226.986
					425.996	226.986
					427.117	226.986
					428.238	226.986
					429.359	226.986
					430	226.986
					430.48	226.986
					431.602	226.986
					432.723	226.986
					433.844	226.986
					434.965	226.986
					436.086	226.986
					437.207	226.986
					438.328	226.986
					439.449	226.986
					440.571	226.986
					441.692	226.986
					442.813	226.986
					443.934	226.986
					445.055	226.986
					446.176	226.986
					447.297	226.986
					448.418	226.986
					449.54	226.986
					450.661	226.986
					451.782	226.986
					452.903	226.986
					454.024	226.986
					455.145	226.986
					456.266	226.986
					457.387	226.986
					458.509	226.986
					459.63	226.986
					460.751	226.986
					461.872	226.986
					462.993	226.986
					464.114	226.986
					465.235	226.986
					466.356	226.986
					467.477	226.986
					468.599	226.986
					469.72	226.986
					470.841	226.986
					471.962	226.986
					473.083	226.986
					474.204	226.986
					475.325	226.986
					476.446	226.986
					477.568	226.986
					478.689	226.986
					479.81	226.986
					480.931	226.986
					482.052	226.986
					483.173	226.986
					484.294	226.986
					485.415	226.986
					486.537	226.986
					487.658	226.986
					488.779	226.986
					489.9	226.986
					491.021	226.986
					492.142	226.986
					493.263	226.986
					494.384	226.986
					495.506	226.986
					496.627	226.986
					497.748	226.986
					498.869	226.986
					499.99	226.986
					501.111	226.986
					502.232	226.986
					503.353	226.986
					504.474	226.986
					505.596	226.986
					506.717	226.986
					507.838	226.986
					508.959	226.986
					510	226.986
					510.08	226.986
					511.201	226.986
					512.322	226.986
					513.443	226.986
					514.565	226.986
					515.686	226.986
					516.807	226.986
					517.928	226.986
					519.049	226.986
					520.17	226.986
					521.291	226.986
					522.412	226.986
					523.534	226.986
					524.655	226.986
					525.776	226.986
					526.897	226.986
					528.018	226.986
					529.139	226.986
					530.26	226.986
					531.381	226.986
					532.503	226.986
					533.624	226.986
					534.745	226.986
					535.866	226.986
					536.987	226.986
					538.108	226.986
					539.229	226.986
					540.35	226.986
					541.471	226.986
					542.593	226.986
					543.714	226.986
					544.835	226.986
					545.956	226.986
					547.077	226.986
					548.198	226.986
					549.319	226.986
					550.44	226.986
					551.562	226.986
					552.683	226.986
					553.804	226.986
					554.925	226.986
					556.046	226.986
					557.167	226.986
					558.288	226.986
					559.409	226.986
					560.531	226.986
					561.652	226.986
					562.773	226.986
					563.894	226.986
					565.015	226.986
					566.136	226.986
					567.257	226.986
					568.378	226.986
					569.5	226.986
					570.621	226.986
					571.742	226.986
					572.863	226.986
					573.984	226.986
					575.105	226.986
					576.226	226.986
					577.347	226.986
					578.468	226.986
					579.59	226.986
					580.711	226.986
					581.832	226.986
					582.953	226.986
					584.074	226.986
					585.195	226.986
					586.316	226.986
					587.437	226.986
					588.559	226.986
					589.68	226.986
					590	226.986
					590.801	226.986
					591.922	226.986
					593.043	226.986
					594.164	226.986
					595.285	226.986
					596.406	226.986
					597.528	226.986
					598.649	226.986
					599.77	226.986
					600.891	226.986
					602.012	226.986
					603.133	226.986
					604.254	226.986
					605.375	226.986
					606.496	226.986
					607.618	226.986
					608.739	226.986
					609.86	226.986
					610.981	226.986
					612.102	226.986
					613.223	226.986
					614.344	226.986
					615.465	226.986
					616.587	226.986
					617.708	226.986
					618.829	226.986
					619.95	226.986
					621.071	226.986
					622.192	226.986
					623.313	226.986
					624.434	226.986
					625.556	226.986
					626.677	226.986
					627.798	226.986
					628.919	226.986
					630.04	226.986
					631.161	226.986
					632.282	226.986
					633.403	226.986
					634.525	226.986
					635.646	226.986
					636.767	226.986
					637.888	226.986
					639.009	226.986
					640.13	226.986
					641.251	226.986
					642.372	226.986
					643.493	226.986
					644.615	226.986
					645.736	226.986
					646.857	226.986
					647.978	226.986
					649.099	226.986
					650.22	226.986
					651.341	226.986
					652.462	226.986
					653.584	226.986
					654.705	226.986
					655.826	226.986
					656.947	226.986
					658.068	226.986
					659.189	226.986
					660.31	226.986
					661.431	226.986
					662.553	226.986
					663.674	226.986
					664.795	226.986
					665.916	226.986
					667.037	226.986
					668.158	226.986
					670	226.986
					670.4	226.986
					671.522	226.986
					672.643	226.986
					673.764	226.986
					674.885	226.986
					676.006	226.986
					677.127	226.986
					678.248	226.986
					679.369	226.986
					680.49	226.986
					681.612	226.986
					682.733	226.986
					683.854	226.986
					684.975	226.986
					686.096	226.986
					687.217	226.986
					688.338	226.986
					689.459	226.986
					690.581	226.986
					691.702	226.986
					692.823	226.986
					693.944	226.986
					695.065	226.986
					696.186	226.986
					697.307	226.986
					698.428	226.986
					699.55	226.986
					700.671	226.986
					701.792	226.986
					702.913	226.986
					704.034	226.986
					705.155	226.986
					706.276	226.986
					707.397	226.986
					708.519	226.986
					709.64	226.986
					710.761	226.986
					711.882	226.986
					713.003	226.986
					714.124	226.986
					715.245	226.986
					716.366	226.986
					717.487	226.986
					718.609	226.986
					719.73	226.986
					720.851	226.986
					721.972	226.986
					723.093	226.986
					724.214	226.986
					725.335	226.986
					726.456	226.986
					727.578	226.986
					728.699	226.986
					729.82	226.986
					730.941	226.986
					732.062	226.986
					733.183	226.986
					734.304	226.986
					735.425	226.986
					750	226.986
