# Supplementary material for: MCAK recognizes the nucleotide-dependent feature at growing microtubule ends
Source: eLife journal article supplement (doi:10.7554/elife.92958), 2023-11-17
Supplement: fig2-data1 [file Figure2_source data 1.xlsx]

## Sheet: Figure.2A
growing microtubule end for GFP-MCAK					GFP-MCAK						growing microtubule end for EB1-GFP					EB1-GFP						growing microtubule end for XMAP215-GFP					XMAP215-GFP
position (nm)	normalized intensity of a growing microtubule end	position (nm)	half-Gaussian fit to a growing microtubule end		position (nm)	normalized intensity of GFP-MCAK	position (nm)	Gaussian fit to the normalized intensity of GFP-MCAK			position (nm)	normalized intensity of a growing microtubule end	position (nm)	half-Gaussian fit to a growing microtubule end		position (nm)	normalized intensity of EB1-GFP	position (nm)	Gaussian fit to the normalized intensity of EB1-GFP			position (nm)	normalized intensity of a growing microtubule end	position (nm)	half-Gaussian fit to a growing microtubule end		position (nm)	normalized intensity of XMAP215-GFP	position (nm)	Gaussian fit to the normalized intensity of XMAP215-GFP
-400	0.86636	-400	1		-400	-0.06054	-400	1.45792e-05			-400	1.2648	-400	1		-420	0.12088	-420	0.00361			-400	1.06782	-400	1		-400	-0.10168	-400	0.00512
-320	1.15442	-397.333	1		-320	-0.06054	-398.879	1.50789e-05			-320	1.3607	-397.333	1		-340	-0.01507	-418.879	0.00361			-320	1.1039	-397.333	1		-320	-0.07946	-398.879	0.00512
-240	0.92246	-394.667	1		-240	0.000237195	-397.758	1.56034e-05			-240	0.92446	-394.667	1		-260	-0.02514	-417.758	0.00361			-240	1.1039	-394.667	1		-240	-0.04489	-397.758	0.00512
-160	1.24988	-392	1		-160	-0.04127	-396.637	1.61539e-05			-160	0.82212	-392	1		-180	-0.07885	-416.637	0.00361			-160	1.34141	-392	1		-160	-0.28193	-396.637	0.00512
-80	0.80523	-389.333	1		-80	0.14552	-395.516	1.67314e-05			-80	0.95662	-389.333	1		-100	0.40117	-415.516	0.00361			-80	1.33818	-389.333	1		-80	0.25141	-395.516	0.00512
0	0.95931	-386.667	1		0	0.73851	-394.394	1.73374e-05			0	1.05662	-386.667	1		-20	0.37264	-414.394	0.00361			0	1.06243	-386.667	1		0	0.36746	-394.394	0.00512
80	0.94675	-384	1		80	0.7815	-393.273	1.79732e-05			80	0.64611	-384	1		60	0.90637	-413.273	0.00361			80	0.75276	-384	1		80	1.03908	-393.273	0.00513
160	0.42589	-381.333	1		160	1.02314	-392.152	1.86401e-05			160	0.51453	-381.333	1		140	0.90637	-412.152	0.00361			160	0.4754	-381.333	1		160	0.965	-392.152	0.00513
240	0.42589	-378.667	1		240	0.46425	-391.031	1.93396e-05			240	0.31337	-378.667	1		220	0.60258	-411.031	0.00361			240	0.15926	-378.667	1		240	0.44894	-391.031	0.00513
320	0.06163	-376	1		320	0.04471	-389.91	2.00731e-05			320	0.03151	-376	1		300	-0.18627	-409.91	0.00361			320	0.18835	-376	1		320	0.5403	-389.91	0.00513
400	0.23078	-373.333	1		400	0.04471	-388.789	2.08423e-05			400	0.18531	-373.333	1		380	-0.17284	-408.789	0.00361			400	-0.03516	-373.333	1		400	0.02671	-388.789	0.00513
480	0.14223	-370.667	1		480	0.24484	-387.668	2.16488e-05			480	0.00637	-370.667	1		460	0.08899	-407.668	0.00361			480	-0.30336	-370.667	1		480	0.21684	-387.668	0.00513
560	-0.17201	-368	1		560	0.24484	-386.547	2.24944e-05			560	0.00637	-368	1		540	0.00843	-406.547	0.00361			560	0.01277	-368	1		560	-0.05971	-386.547	0.00513
640	-0.17536	-365.333	1		640	0.04175	-385.425	2.33806e-05			640	0.20227	-365.333	1		620	0.07724	-405.425	0.00361			640	0.04347	-365.333	1		640	0.15758	-385.425	0.00513
720	-0.1561	-362.667	1		720	-0.28143	-384.304	2.43096e-05			720	0.27595	-362.667	1		700	0.04032	-404.304	0.00361			720	0.386	-362.667	1		720	0.15758	-384.304	0.00513
		-360	1				-383.183	2.52831e-05					-360	1				-403.183	0.00361					-360	1				-383.183	0.00513
		-357.333	1				-382.062	2.63033e-05					-357.333	1				-402.062	0.00361					-357.333	1				-382.062	0.00514
		-354.667	1				-380.941	2.73721e-05					-354.667	1				-400.941	0.00361					-354.667	1				-380.941	0.00514
		-352	1				-379.82	2.84919e-05					-352	1				-399.82	0.00361					-352	1				-379.82	0.00514
		-349.333	1				-378.699	2.96648e-05					-349.333	1				-398.699	0.00361					-349.333	1				-378.699	0.00514
		-346.667	1				-377.578	3.08934e-05					-346.667	1				-397.578	0.00361					-346.667	1				-377.578	0.00514
		-344	1				-376.456	3.218e-05					-344	1				-396.456	0.00361					-344	1				-376.456	0.00514
		-341.333	1				-375.335	3.35273e-05					-341.333	1				-395.335	0.00361					-341.333	1				-375.335	0.00514
		-338.667	1				-374.214	3.49379e-05					-338.667	1				-394.214	0.00361					-338.667	1				-374.214	0.00515
		-336	1				-373.093	3.64146e-05					-336	1				-393.093	0.00361					-336	1				-373.093	0.00515
		-333.333	1				-371.972	3.79605e-05					-333.333	1				-391.972	0.00361					-333.333	1				-371.972	0.00515
		-330.667	1				-370.851	3.95785e-05					-330.667	1				-390.851	0.00361					-330.667	1				-370.851	0.00515
		-328	1				-369.73	4.12717e-05					-328	1				-389.73	0.00361					-328	1				-369.73	0.00515
		-325.333	1				-368.609	4.30435e-05					-325.333	1				-388.609	0.00361					-325.333	1				-368.609	0.00515
		-322.667	1				-367.487	4.48974e-05					-322.667	1				-387.487	0.00361					-322.667	1				-367.487	0.00516
		-320	1				-366.366	4.68368e-05					-320	1				-386.366	0.00361					-320	1				-366.366	0.00516
		-317.333	1				-365.245	4.88656e-05					-317.333	1				-385.245	0.00361					-317.333	1				-365.245	0.00516
		-314.667	1				-364.124	5.09875e-05					-314.667	1				-384.124	0.00361					-314.667	1				-364.124	0.00516
		-312	1				-363.003	5.32065e-05					-312	1				-383.003	0.00361					-312	1				-363.003	0.00517
		-309.333	1				-361.882	5.5527e-05					-309.333	1				-381.882	0.00361					-309.333	1				-361.882	0.00517
		-306.667	1				-360.761	5.79531e-05					-306.667	1				-380.761	0.00361					-306.667	1				-360.761	0.00517
		-304	1				-359.64	6.04895e-05					-304	1				-379.64	0.00361					-304	1				-359.64	0.00517
		-301.333	1				-358.519	6.31408e-05					-301.333	1				-378.519	0.00361					-301.333	1				-358.519	0.00518
		-298.667	1				-357.397	6.59119e-05					-298.667	1				-377.397	0.00361					-298.667	1				-357.397	0.00518
		-296	1				-356.276	6.88079e-05					-296	1				-376.276	0.00361					-296	1				-356.276	0.00518
		-293.333	1				-355.155	7.1834e-05					-293.333	1				-375.155	0.00361					-293.333	1				-355.155	0.00519
		-290.667	1				-354.034	7.49958e-05					-290.667	1				-374.034	0.00361					-290.667	1				-354.034	0.00519
		-288	1				-352.913	7.82989e-05					-288	1				-372.913	0.00361					-288	1				-352.913	0.00519
		-285.333	1				-351.792	8.17492e-05					-285.333	1				-371.792	0.00361					-285.333	1				-351.792	0.0052
		-282.667	1				-350.671	8.53529e-05					-282.667	1				-370.671	0.00361					-282.667	1				-350.671	0.0052
		-280	1				-349.55	8.91164e-05					-280	1				-369.55	0.00361					-280	1				-349.55	0.00521
		-277.333	1				-348.428	9.30463e-05					-277.333	1				-368.428	0.00361					-277.333	1				-348.428	0.00521
		-274.667	1				-347.307	9.71494e-05					-274.667	1				-367.307	0.00361					-274.667	1				-347.307	0.00522
		-272	1				-346.186	0.000101433					-272	1				-366.186	0.00361					-272	1				-346.186	0.00522
		-269.333	1				-345.065	0.000105904					-269.333	1				-365.065	0.00362					-269.333	1				-345.065	0.00522
		-266.667	1				-343.944	0.000110571					-266.667	1				-363.944	0.00362					-266.667	1				-343.944	0.00523
		-264	1				-342.823	0.000115441					-264	1				-362.823	0.00362					-264	1				-342.823	0.00523
		-261.333	1				-341.702	0.000120523					-261.333	1				-361.702	0.00362					-261.333	1				-341.702	0.00524
		-258.667	1				-340.581	0.000125826					-258.667	1				-360.581	0.00362					-258.667	1				-340.581	0.00525
		-256	1				-339.459	0.000131357					-256	1				-359.459	0.00362					-256	1				-339.459	0.00525
		-253.333	1				-338.338	0.000137127					-253.333	1				-358.338	0.00362					-253.333	1				-338.338	0.00526
		-250.667	1				-337.217	0.000143145					-250.667	1				-357.217	0.00362					-250.667	1				-337.217	0.00526
		-248	1				-336.096	0.000149421					-248	1				-356.096	0.00362					-248	1				-336.096	0.00527
		-245.333	1				-334.975	0.000155965					-245.333	1				-354.975	0.00362					-245.333	1				-334.975	0.00528
		-242.667	1				-333.854	0.000162788					-242.667	1				-353.854	0.00362					-242.667	1				-333.854	0.00529
		-240	1				-332.733	0.000169901					-240	1				-352.733	0.00362					-240	1				-332.733	0.00529
		-237.333	1				-331.612	0.000177316					-237.333	1				-351.612	0.00362					-237.333	1				-331.612	0.0053
		-234.667	1				-330.49	0.000185043					-234.667	1				-350.49	0.00362					-234.667	1				-330.49	0.00531
		-232	1				-329.369	0.000193096					-232	1				-349.369	0.00362					-232	1				-329.369	0.00532
		-229.333	1				-328.248	0.000201488					-229.333	1				-348.248	0.00363					-229.333	1				-328.248	0.00533
		-226.667	1				-327.127	0.000210231					-226.667	1				-347.127	0.00363					-226.667	1				-327.127	0.00533
		-224	1				-326.006	0.000219339					-224	1				-346.006	0.00363					-224	1				-326.006	0.00534
		-221.333	1				-324.885	0.000228826					-221.333	1				-344.885	0.00363					-221.333	1				-324.885	0.00535
		-218.667	1				-323.764	0.000238707					-218.667	1				-343.764	0.00363					-218.667	1				-323.764	0.00536
		-216	1				-322.643	0.000248997					-216	1				-342.643	0.00363					-216	1				-322.643	0.00537
		-213.333	1				-321.522	0.000259711					-213.333	1				-341.522	0.00363					-213.333	1				-321.522	0.00539
		-210.667	1				-320.4	0.000270867					-210.667	1				-340.4	0.00363					-210.667	1				-320.4	0.0054
		-208	1				-320	0.000274961					-208	1				-340	0.00363					-208	1				-320	0.0054
		-205.333	1				-319.279	0.00028248					-205.333	1				-339.279	0.00364					-205.333	1				-319.279	0.00541
		-202.667	1				-318.158	0.000294568					-202.667	1				-338.158	0.00364					-202.667	1				-318.158	0.00542
		-200	1				-317.037	0.000307149					-200	1				-337.037	0.00364					-200	1				-317.037	0.00543
		-197.333	1				-315.916	0.000320241					-197.333	1				-335.916	0.00364					-197.333	1				-315.916	0.00545
		-194.667	1				-314.795	0.000333864					-194.667	1				-334.795	0.00364					-194.667	1				-314.795	0.00546
		-192	1				-313.674	0.000348038					-192	1				-333.674	0.00364					-192	1				-313.674	0.00547
		-189.333	1				-312.553	0.000362782					-189.333	1				-332.553	0.00365					-189.333	1				-312.553	0.00549
		-186.667	1				-311.431	0.000378119					-186.667	1				-331.431	0.00365					-186.667	1				-311.431	0.0055
		-184	1				-310.31	0.00039407					-184	1				-330.31	0.00365					-184	1				-310.31	0.00552
		-181.333	1				-309.189	0.000410657					-181.333	1				-329.189	0.00365					-181.333	1				-309.189	0.00554
		-178.667	1				-308.068	0.000427904					-178.667	1				-328.068	0.00366					-178.667	1				-308.068	0.00555
		-176	1				-306.947	0.000445836					-176	1				-326.947	0.00366					-176	1				-306.947	0.00557
		-173.333	1				-305.826	0.000464477					-173.333	1				-325.826	0.00366					-173.333	1				-305.826	0.00559
		-170.667	1				-304.705	0.000483852					-170.667	1				-324.705	0.00366					-170.667	1				-304.705	0.00561
		-168	1				-303.584	0.000503989					-168	1				-323.584	0.00367					-168	1				-303.584	0.00563
		-165.333	1				-302.462	0.000524915					-165.333	1				-322.462	0.00367					-165.333	1				-302.462	0.00565
		-162.667	1				-301.341	0.000546658					-162.667	1				-321.341	0.00367					-162.667	1				-301.341	0.00567
		-160	1				-300.22	0.000569247					-160	1				-320.22	0.00368					-160	1				-300.22	0.00569
		-157.333	1				-299.099	0.000592713					-157.333	1				-319.099	0.00368					-157.333	1				-299.099	0.00572
		-154.667	1				-297.978	0.000617087					-154.667	1				-317.978	0.00368					-154.667	1				-297.978	0.00574
		-152	1				-296.857	0.000642401					-152	1				-316.857	0.00369					-152	1				-296.857	0.00576
		-149.333	1				-295.736	0.000668687					-149.333	1				-315.736	0.00369					-149.333	1				-295.736	0.00579
		-146.667	1				-294.615	0.000695981					-146.667	1				-314.615	0.0037					-146.667	1				-294.615	0.00582
		-144	1				-293.493	0.000724317					-144	1				-313.493	0.0037					-144	1				-293.493	0.00584
		-141.333	1				-292.372	0.000753732					-141.333	1				-312.372	0.00371					-141.333	1				-292.372	0.00587
		-138.667	1				-291.251	0.000784263					-138.667	1				-311.251	0.00371					-138.667	1				-291.251	0.0059
		-136	1				-290.13	0.000815948					-136	1				-310.13	0.00372					-136	1				-290.13	0.00593
		-133.333	1				-289.009	0.000848828					-133.333	1				-309.009	0.00372					-133.333	1				-289.009	0.00596
		-130.667	1				-287.888	0.000882943					-130.667	1				-307.888	0.00373					-130.667	1				-287.888	0.00599
		-128	1				-286.767	0.000918335					-128	1				-306.767	0.00373					-128	1				-286.767	0.00603
		-125.333	1				-285.646	0.000955049					-125.333	1				-305.646	0.00374					-125.333	1				-285.646	0.00606
		-122.667	1				-284.525	0.000993128					-122.667	1				-304.525	0.00375					-122.667	1				-284.525	0.0061
		-120	1				-283.403	0.00103					-120	1				-303.403	0.00375					-120	1				-283.403	0.00614
		-117.333	1				-282.282	0.00107					-117.333	1				-302.282	0.00376					-117.333	1				-282.282	0.00617
		-114.667	1				-281.161	0.00112					-114.667	1				-301.161	0.00377					-114.667	1				-281.161	0.00621
		-112	1				-280.04	0.00116					-112	1				-300.04	0.00378					-112	1				-280.04	0.00626
		-109.333	1				-278.919	0.00121					-109.333	1				-298.919	0.00378					-109.333	1				-278.919	0.0063
		-106.667	1				-277.798	0.00125					-106.667	1				-297.798	0.00379					-106.667	1				-277.798	0.00634
		-104	1				-276.677	0.0013					-104	1				-296.677	0.0038					-104	1				-276.677	0.00639
		-101.333	1				-275.556	0.00135					-101.333	1				-295.556	0.00381					-101.333	1				-275.556	0.00643
		-98.6667	1				-274.434	0.00141					-98.6667	1				-294.434	0.00382					-98.6667	1				-274.434	0.00648
		-96	1				-273.313	0.00146					-96	1				-293.313	0.00383					-96	1				-273.313	0.00653
		-93.3333	1				-272.192	0.00152					-93.3333	1				-292.192	0.00384					-93.3333	1				-272.192	0.00659
		-90.6667	1				-271.071	0.00157					-90.6667	1				-291.071	0.00386					-90.6667	1				-271.071	0.00664
		-88	1				-269.95	0.00164					-88	1				-289.95	0.00387					-88	1				-269.95	0.0067
		-85.3333	1				-268.829	0.0017					-85.3333	1				-288.829	0.00388					-85.3333	1				-268.829	0.00675
		-82.6667	1				-267.708	0.00176					-82.6667	1				-287.708	0.00389					-82.6667	1				-267.708	0.00681
		-80	1				-266.587	0.00183					-80	1				-286.587	0.00391					-80	1				-266.587	0.00687
		-77.3333	1				-265.465	0.0019					-77.3333	1				-285.465	0.00392					-77.3333	1				-265.465	0.00694
		-74.6667	1				-264.344	0.00197					-74.6667	1				-284.344	0.00394					-74.6667	1				-264.344	0.007
		-72	1				-263.223	0.00205					-72	1				-283.223	0.00395					-72	1				-263.223	0.00707
		-69.3333	1				-262.102	0.00212					-69.3333	1				-282.102	0.00397					-69.3333	1				-262.102	0.00714
		-66.6667	1				-260.981	0.0022					-66.6667	1				-280.981	0.00399					-66.6667	1				-260.981	0.00721
		-64	1				-259.86	0.00229					-64	1				-279.86	0.00401					-64	1				-259.86	0.00729
		-61.3333	1				-258.739	0.00237					-61.3333	1				-278.739	0.00402					-61.3333	1				-258.739	0.00736
		-58.6667	1				-257.618	0.00246					-58.6667	1				-277.618	0.00404					-58.6667	1				-257.618	0.00744
		-56	1				-256.497	0.00255					-56	1				-276.497	0.00406					-56	1				-256.497	0.00753
		-53.3333	1				-255.375	0.00264					-53.3333	1				-275.375	0.00409					-53.3333	1				-255.375	0.00761
		-50.6667	1				-254.254	0.00274					-50.6667	1				-274.254	0.00411					-50.6667	1				-254.254	0.0077
		-48	1				-253.133	0.00284					-48	1				-273.133	0.00413					-48	1				-253.133	0.00779
		-45.3333	1				-252.012	0.00295					-45.3333	1				-272.012	0.00416					-45.3333	1				-252.012	0.00788
		-42.6667	1				-250.891	0.00306					-42.6667	1				-270.891	0.00418					-42.6667	1				-250.891	0.00798
		-40	1				-249.77	0.00317					-40	1				-269.77	0.00421					-40	1				-249.77	0.00808
		-37.3333	1				-248.649	0.00328					-37.3333	1				-268.649	0.00424					-37.3333	1				-248.649	0.00818
		-34.6667	1				-247.528	0.0034					-34.6667	1				-267.528	0.00426					-34.6667	1				-247.528	0.00828
		-32	1				-246.406	0.00352					-32	1				-266.406	0.00429					-32	1				-246.406	0.00839
		-29.3333	1				-245.285	0.00365					-29.3333	1				-265.285	0.00433					-29.3333	1				-245.285	0.0085
		-26.6667	1				-244.164	0.00378					-26.6667	1				-264.164	0.00436					-26.6667	1				-244.164	0.00862
		-24	1				-243.043	0.00392					-24	1				-263.043	0.00439					-24	1				-243.043	0.00874
		-21.3333	1				-241.922	0.00406					-21.3333	1				-261.922	0.00443					-21.3333	1				-241.922	0.00886
		-18.6667	1				-240.801	0.0042					-18.6667	1				-260.801	0.00446					-18.6667	1				-240.801	0.00899
		-16	1				-240	0.00431					-16	1				-260	0.00449					-16	1				-240	0.00908
		-13.3333	1				-239.68	0.00435					-13.3333	1				-259.68	0.0045					-13.3333	1				-239.68	0.00912
		-10.6667	1				-238.559	0.0045					-10.6667	1				-258.559	0.00454					-10.6667	1				-238.559	0.00925
		-8	1				-237.437	0.00466					-8	1				-257.437	0.00458					-8	1				-237.437	0.00939
		-5.33333	1				-236.316	0.00482					-5.33333	1				-256.316	0.00463					-5.33333	1				-236.316	0.00953
		-2.66667	1				-235.195	0.00499					-2.66667	1				-255.195	0.00467					-2.66667	1				-235.195	0.00968
		4.41105e-10	1				-234.074	0.00517					5.61755e-10	1				-254.074	0.00472					0	1				-234.074	0.00983
		2.66667	0.99981				-232.953	0.00535					2.66667	0.99981				-252.953	0.00477					2.66667	0.9998				-232.953	0.00999
		5.33333	0.99923				-231.832	0.00553					5.33333	0.99922				-251.832	0.00482					5.33333	0.99918				-231.832	0.01015
		8	0.99826				-230.711	0.00572					8	0.99825				-250.711	0.00487					8	0.99816				-230.711	0.01031
		10.6667	0.99691				-229.59	0.00592					10.6667	0.99689				-249.59	0.00493					10.6667	0.99673				-229.59	0.01048
		13.3333	0.99517				-228.468	0.00612					13.3333	0.99514				-248.468	0.00499					13.3333	0.99489				-228.468	0.01066
		16	0.99306				-227.347	0.00633					16	0.99301				-247.347	0.00505					16	0.99265				-227.347	0.01084
		18.6667	0.99056				-226.226	0.00655					18.6667	0.9905				-246.226	0.00511					18.6667	0.99001				-226.226	0.01102
		21.3333	0.98769				-225.105	0.00677					21.3333	0.98761				-245.105	0.00517					21.3333	0.98697				-225.105	0.01121
		24	0.98445				-223.984	0.007					24	0.98434				-243.984	0.00524					24	0.98354				-223.984	0.01141
		26.6667	0.98083				-222.863	0.00723					26.6667	0.9807				-242.863	0.00531					26.6667	0.97972				-222.863	0.01161
		29.3333	0.97685				-221.742	0.00748					29.3333	0.9767				-241.742	0.00538					29.3333	0.97552				-221.742	0.01182
		32	0.97252				-220.621	0.00773					32	0.97233				-240.621	0.00546					32	0.97093				-220.621	0.01203
		34.6667	0.96782				-219.5	0.00799					34.6667	0.96761				-239.5	0.00554					34.6667	0.96597				-219.5	0.01225
		37.3333	0.96278				-218.378	0.00825					37.3333	0.96253				-238.378	0.00562					37.3333	0.96064				-218.378	0.01248
		40	0.95739				-217.257	0.00852					40	0.95711				-237.257	0.0057					40	0.95495				-217.257	0.01271
		42.6667	0.95166				-216.136	0.00881					42.6667	0.95134				-236.136	0.00579					42.6667	0.94891				-216.136	0.01295
		45.3333	0.9456				-215.015	0.0091					45.3333	0.94524				-235.015	0.00588					45.3333	0.94251				-215.015	0.0132
		48	0.93922				-213.894	0.00939					48	0.93882				-233.894	0.00598					48	0.93578				-213.894	0.01345
		50.6667	0.93252				-212.773	0.0097					50.6667	0.93208				-232.773	0.00607					50.6667	0.92871				-212.773	0.01371
		53.3333	0.92551				-211.652	0.01002					53.3333	0.92502				-231.652	0.00618					53.3333	0.92132				-211.652	0.01398
		56	0.91819				-210.531	0.01034					56	0.91766				-230.531	0.00628					56	0.91362				-210.531	0.01425
		58.6667	0.91058				-209.409	0.01068					58.6667	0.91				-229.409	0.00639					58.6667	0.90561				-209.409	0.01453
		61.3333	0.90269				-208.288	0.01102					61.3333	0.90206				-228.288	0.00651					61.3333	0.8973				-208.288	0.01482
		64	0.89451				-207.167	0.01137					64	0.89384				-227.167	0.00662					64	0.8887				-207.167	0.01512
		66.6667	0.88607				-206.046	0.01174					66.6667	0.88534				-226.046	0.00675					66.6667	0.87982				-206.046	0.01543
		69.3333	0.87737				-204.925	0.01211					69.3333	0.87659				-224.925	0.00687					69.3333	0.87068				-204.925	0.01574
		72	0.86841				-203.804	0.0125					72	0.86758				-223.804	0.007					72	0.86127				-203.804	0.01606
		74.6667	0.85922				-202.683	0.01289					74.6667	0.85833				-222.683	0.00714					74.6667	0.85162				-202.683	0.0164
		77.3333	0.84979				-201.562	0.0133					77.3333	0.84885				-221.562	0.00728					77.3333	0.84174				-201.562	0.01674
		80	0.84014				-200.44	0.01372					80	0.83915				-220.44	0.00743					80	0.83163				-200.44	0.01708
		82.6667	0.83028				-199.319	0.01415					82.6667	0.82924				-219.319	0.00758					82.6667	0.8213				-199.319	0.01744
		85.3333	0.82022				-198.198	0.01459					85.3333	0.81912				-218.198	0.00774					85.3333	0.81077				-198.198	0.01781
		88	0.80997				-197.077	0.01504					88	0.80881				-217.077	0.0079					88	0.80004				-197.077	0.01819
		90.6667	0.79953				-195.956	0.01551					90.6667	0.79832				-215.956	0.00807					90.6667	0.78914				-195.956	0.01858
		93.3333	0.78893				-194.835	0.01599					93.3333	0.78766				-214.835	0.00825					93.3333	0.77806				-194.835	0.01897
		96	0.77816				-193.714	0.01648					96	0.77684				-213.714	0.00843					96	0.76683				-193.714	0.01938
		98.6667	0.76725				-192.593	0.01698					98.6667	0.76587				-212.593	0.00861					98.6667	0.75544				-192.593	0.0198
		101.333	0.75619				-191.471	0.0175					101.333	0.75475				-211.471	0.00881					101.333	0.74392				-191.471	0.02023
		104	0.745				-190.35	0.01803					104	0.74352				-210.35	0.00901					104	0.73228				-190.35	0.02067
		106.667	0.7337				-189.229	0.01858					106.667	0.73216				-209.229	0.00922					106.667	0.72053				-189.229	0.02112
		109.333	0.72229				-188.108	0.01914					109.333	0.72069				-208.108	0.00943					109.333	0.70867				-188.108	0.02158
		112	0.71078				-186.987	0.01971					112	0.70913				-206.987	0.00965					112	0.69672				-186.987	0.02206
		114.667	0.69918				-185.866	0.0203					114.667	0.69748				-205.866	0.00988					114.667	0.68469				-185.866	0.02254
		117.333	0.68751				-184.745	0.02091					117.333	0.68576				-204.745	0.01012					117.333	0.6726				-184.745	0.02304
		120	0.67577				-183.624	0.02153					120	0.67397				-203.624	0.01037					120	0.66045				-183.624	0.02355
		122.667	0.66397				-182.502	0.02217					122.667	0.66213				-202.502	0.01062					122.667	0.64825				-182.502	0.02408
		125.333	0.65213				-181.381	0.02282					125.333	0.65023				-201.381	0.01088					125.333	0.63602				-181.381	0.02462
		128	0.64025				-180.26	0.02349					128	0.63831				-200.26	0.01116					128	0.62376				-180.26	0.02517
		130.667	0.62834				-179.139	0.02418					130.667	0.62636				-199.139	0.01144					130.667	0.61148				-179.139	0.02573
		133.333	0.61641				-178.018	0.02488					133.333	0.61439				-198.018	0.01173					133.333	0.59921				-178.018	0.02631
		136	0.60448				-176.897	0.0256					136	0.60242				-196.897	0.01203					136	0.58694				-176.897	0.0269
		138.667	0.59255				-175.776	0.02634					138.667	0.59045				-195.776	0.01234					138.667	0.57468				-175.776	0.0275
		141.333	0.58063				-174.655	0.0271					141.333	0.57849				-194.655	0.01266					141.333	0.56245				-174.655	0.02812
		144	0.56873				-173.534	0.02788					144	0.56656				-193.534	0.01299					144	0.55026				-173.534	0.02876
		146.667	0.55686				-172.412	0.02868					146.667	0.55465				-192.412	0.01333					146.667	0.53811				-172.412	0.02941
		149.333	0.54502				-171.291	0.02949					149.333	0.54278				-191.291	0.01368					149.333	0.52601				-171.291	0.03007
		152	0.53323				-170.17	0.03033					152	0.53096				-190.17	0.01404					152	0.51397				-170.17	0.03075
		154.667	0.5215				-169.049	0.03118					154.667	0.5192				-189.049	0.01442					154.667	0.50201				-169.049	0.03145
		157.333	0.50982				-167.928	0.03206					157.333	0.50749				-187.928	0.0148					157.333	0.49012				-167.928	0.03217
		160	0.49821				-166.807	0.03296					160	0.49586				-186.807	0.0152					160	0.47831				-166.807	0.0329
		162.667	0.48668				-165.686	0.03388					162.667	0.48431				-185.686	0.01561					162.667	0.4666				-165.686	0.03364
		165.333	0.47523				-164.565	0.03482					165.333	0.47284				-184.565	0.01604					165.333	0.45499				-164.565	0.03441
		168	0.46388				-163.443	0.03578					168	0.46146				-183.443	0.01648					168	0.44349				-163.443	0.03519
		170.667	0.45261				-162.322	0.03677					170.667	0.45018				-182.322	0.01693					170.667	0.4321				-162.322	0.03599
		173.333	0.44145				-161.201	0.03777					173.333	0.43901				-181.201	0.01739					173.333	0.42083				-161.201	0.03681
		176	0.4304				-160.08	0.03881					176	0.42794				-180.08	0.01787					176	0.40969				-160.08	0.03764
		178.667	0.41946				-160	0.03888					178.667	0.417				-180	0.01791					178.667	0.39867				-160	0.0377
		181.333	0.40865				-158.959	0.03986					181.333	0.40617				-178.959	0.01837					181.333	0.3878				-158.959	0.0385
		184	0.39795				-157.838	0.04094					184	0.39547				-177.838	0.01887					184	0.37707				-157.838	0.03937
		186.667	0.38739				-156.717	0.04204					186.667	0.3849				-176.717	0.0194					186.667	0.36648				-156.717	0.04026
		189.333	0.37696				-155.596	0.04317					189.333	0.37447				-175.596	0.01994					189.333	0.35605				-155.596	0.04118
		192	0.36667				-154.474	0.04433					192	0.36418				-174.474	0.0205					192	0.34577				-154.474	0.04211
		194.667	0.35653				-153.353	0.04551					194.667	0.35404				-173.353	0.02107					194.667	0.33565				-153.353	0.04306
		197.333	0.34653				-152.232	0.04671					197.333	0.34404				-172.232	0.02166					197.333	0.32569				-152.232	0.04404
		200	0.33668				-151.111	0.04795					200	0.3342				-171.111	0.02227					200	0.3159				-151.111	0.04503
		202.667	0.32698				-149.99	0.04921					202.667	0.32451				-169.99	0.02289					202.667	0.30628				-149.99	0.04605
		205.333	0.31744				-148.869	0.0505					205.333	0.31498				-168.869	0.02354					205.333	0.29683				-148.869	0.04709
		208	0.30806				-147.748	0.05181					208	0.3056				-167.748	0.0242					208	0.28755				-147.748	0.04815
		210.667	0.29884				-146.627	0.05316					210.667	0.2964				-166.627	0.02488					210.667	0.27845				-146.627	0.04923
		213.333	0.28978				-145.506	0.05453					213.333	0.28736				-165.506	0.02558					213.333	0.26952				-145.506	0.05034
		216	0.28089				-144.384	0.05593					216	0.27848				-164.384	0.0263					216	0.26078				-144.384	0.05146
		218.667	0.27217				-143.263	0.05736					218.667	0.26978				-163.263	0.02704					218.667	0.25222				-143.263	0.05262
		221.333	0.26362				-142.142	0.05882					221.333	0.26124				-162.142	0.0278					221.333	0.24383				-142.142	0.05379
		224	0.25523				-141.021	0.06032					224	0.25288				-161.021	0.02859					224	0.23563				-141.021	0.05499
		226.667	0.24702				-139.9	0.06184					226.667	0.24468				-159.9	0.02939					226.667	0.22761				-139.9	0.05622
		229.333	0.23898				-138.779	0.06339					229.333	0.23667				-158.779	0.03022					229.333	0.21978				-138.779	0.05747
		232	0.23111				-137.658	0.06498					232	0.22882				-157.658	0.03107					232	0.21213				-137.658	0.05874
		234.667	0.22341				-136.537	0.0666					234.667	0.22115				-156.537	0.03194					234.667	0.20466				-136.537	0.06004
		237.333	0.21589				-135.415	0.06825					237.333	0.21365				-155.415	0.03284					237.333	0.19737				-135.415	0.06137
		240	0.20854				-134.294	0.06994					240	0.20633				-154.294	0.03376					240	0.19026				-134.294	0.06272
		242.667	0.20136				-133.173	0.07165					242.667	0.19918				-153.173	0.03471					242.667	0.18334				-133.173	0.0641
		245.333	0.19435				-132.052	0.07341					245.333	0.1922				-152.052	0.03568					245.333	0.17659				-132.052	0.06551
		248	0.18752				-130.931	0.07519					248	0.1854				-150.931	0.03668					248	0.17002				-130.931	0.06694
		250.667	0.18085				-129.81	0.07702					250.667	0.17876				-149.81	0.0377					250.667	0.16363				-129.81	0.06841
		253.333	0.17436				-128.689	0.07887					253.333	0.1723				-148.689	0.03875					253.333	0.15742				-128.689	0.0699
		256	0.16803				-127.568	0.08077					256	0.16601				-147.568	0.03983					256	0.15138				-127.568	0.07141
		258.667	0.16187				-126.446	0.08269					258.667	0.15988				-146.446	0.04093					258.667	0.14551				-126.446	0.07296
		261.333	0.15587				-125.325	0.08466					261.333	0.15392				-145.325	0.04207					261.333	0.13981				-125.325	0.07454
		264	0.15004				-124.204	0.08666					264	0.14812				-144.204	0.04323					264	0.13428				-124.204	0.07615
		266.667	0.14437				-123.083	0.0887					266.667	0.14249				-143.083	0.04442					266.667	0.12892				-123.083	0.07778
		269.333	0.13887				-121.962	0.09078					269.333	0.13702				-141.962	0.04565					269.333	0.12372				-121.962	0.07945
		272	0.13352				-120.841	0.0929					272	0.1317				-140.841	0.0469					272	0.11868				-120.841	0.08115
		274.667	0.12832				-119.72	0.09506					274.667	0.12655				-139.72	0.04819					274.667	0.1138				-119.72	0.08288
		277.333	0.12328				-118.599	0.09725					277.333	0.12154				-138.599	0.0495					277.333	0.10907				-118.599	0.08464
		280	0.1184				-117.477	0.09949					280	0.11669				-137.477	0.05085					280	0.1045				-117.477	0.08643
		282.667	0.11366				-116.356	0.10176					282.667	0.11199				-136.356	0.05224					282.667	0.10008				-116.356	0.08825
		285.333	0.10907				-115.235	0.10407					285.333	0.10744				-135.235	0.05365					285.333	0.09581				-115.235	0.09011
		288	0.10462				-114.114	0.10643					288	0.10303				-134.114	0.0551					288	0.09168				-114.114	0.092
		290.667	0.10032				-112.993	0.10883					290.667	0.09877				-132.993	0.05659					290.667	0.08769				-112.993	0.09392
		293.333	0.09616				-111.872	0.11127					293.333	0.09464				-131.872	0.05811					293.333	0.08384				-111.872	0.09588
		296	0.09213				-110.751	0.11375					296	0.09065				-130.751	0.05967					296	0.08013				-110.751	0.09787
		298.667	0.08824				-109.63	0.11627					298.667	0.0868				-129.63	0.06126					298.667	0.07656				-109.63	0.09989
		301.333	0.08448				-108.509	0.11884					301.333	0.08307				-128.509	0.06289					301.333	0.07311				-108.509	0.10195
		304	0.08085				-107.387	0.12144					304	0.07948				-127.387	0.06456					304	0.06978				-107.387	0.10405
		306.667	0.07734				-106.266	0.1241					306.667	0.07601				-126.266	0.06626					306.667	0.06659				-106.266	0.10618
		309.333	0.07396				-105.145	0.12679					309.333	0.07267				-125.145	0.06801					309.333	0.06351				-105.145	0.10834
		312	0.0707				-104.024	0.12953					312	0.06944				-124.024	0.06979					312	0.06055				-104.024	0.11055
		314.667	0.06756				-102.903	0.13232					314.667	0.06633				-122.903	0.07162					314.667	0.0577				-102.903	0.11278
		317.333	0.06453				-101.782	0.13515					317.333	0.06334				-121.782	0.07348					317.333	0.05497				-101.782	0.11506
		320	0.06161				-100.661	0.13802					320	0.06046				-120.661	0.07539					320	0.05234				-100.661	0.11737
		322.667	0.0588				-99.5395	0.14094					322.667	0.05768				-119.54	0.07734					322.667	0.04982				-99.5395	0.11972
		325.333	0.0561				-98.4184	0.14391					325.333	0.05502				-118.418	0.07933					325.333	0.0474				-98.4184	0.1221
		328	0.0535				-97.2973	0.14692					328	0.05245				-117.297	0.08136					328	0.04508				-97.2973	0.12453
		330.667	0.05101				-96.1762	0.14998					330.667	0.04999				-116.176	0.08344					330.667	0.04286				-96.1762	0.12699
		333.333	0.04861				-95.0551	0.15308					333.333	0.04762				-115.055	0.08557					333.333	0.04072				-95.0551	0.12949
		336	0.0463				-93.9339	0.15624					336	0.04535				-113.934	0.08773					336	0.03868				-93.9339	0.13203
		338.667	0.04409				-92.8128	0.15943					338.667	0.04317				-112.813	0.08995					338.667	0.03673				-92.8128	0.13461
		341.333	0.04197				-91.6917	0.16268					341.333	0.04107				-111.692	0.09221					341.333	0.03486				-91.6917	0.13723
		344	0.03993				-90.5706	0.16598					344	0.03907				-110.571	0.09451					344	0.03307				-90.5706	0.13989
		346.667	0.03798				-89.4494	0.16932					346.667	0.03714				-109.449	0.09686					346.667	0.03136				-89.4494	0.14258
		349.333	0.03611				-88.3283	0.17271					349.333	0.0353				-108.328	0.09926					349.333	0.02973				-88.3283	0.14532
		352	0.03432				-87.2072	0.17615					352	0.03354				-107.207	0.10171					352	0.02817				-87.2072	0.1481
		354.667	0.0326				-86.0861	0.17963					354.667	0.03185				-106.086	0.10421					354.667	0.02668				-86.0861	0.15092
		357.333	0.03096				-84.965	0.18317					357.333	0.03024				-104.965	0.10676					357.333	0.02526				-84.965	0.15378
		360	0.02939				-83.8438	0.18675					360	0.02869				-103.844	0.10936					360	0.02391				-83.8438	0.15668
		362.667	0.02789				-82.7227	0.19039					362.667	0.02722				-102.723	0.112					362.667	0.02262				-82.7227	0.15962
		365.333	0.02645				-81.6016	0.19407					365.333	0.02581				-101.602	0.1147					365.333	0.02139				-81.6016	0.16261
		368	0.02508				-80.4805	0.1978					368	0.02446				-100.48	0.11745					368	0.02022				-80.4805	0.16563
		370.667	0.02377				-80	0.19941					370.667	0.02318				-100	0.11865					370.667	0.0191				-80	0.16694
		373.333	0.02252				-79.3594	0.20158					373.333	0.02195				-99.3594	0.12026					373.333	0.01804				-79.3594	0.1687
		376	0.02133				-78.2382	0.20541					376	0.02078				-98.2382	0.12311					376	0.01703				-78.2382	0.17181
		378.667	0.02019				-77.1171	0.20929					378.667	0.01966				-97.1171	0.12602					378.667	0.01607				-77.1171	0.17496
		381.333	0.01911				-75.996	0.21322					381.333	0.0186				-95.996	0.12898					381.333	0.01516				-75.996	0.17816
		384	0.01808				-74.8749	0.2172					384	0.01759				-94.8749	0.132					384	0.01429				-74.8749	0.1814
		386.667	0.01709				-73.7537	0.22123					386.667	0.01663				-93.7537	0.13507					386.667	0.01347				-73.7537	0.18468
		389.333	0.01616				-72.6326	0.22531					389.333	0.01571				-92.6326	0.1382					389.333	0.01269				-72.6326	0.188
		392	0.01527				-71.5115	0.22943					392	0.01484				-91.5115	0.14138					392	0.01195				-71.5115	0.19137
		394.667	0.01442				-70.3904	0.23361					394.667	0.01401				-90.3904	0.14461					394.667	0.01125				-70.3904	0.19478
		397.333	0.01361				-69.2693	0.23784					397.333	0.01322				-89.2693	0.14791					397.333	0.01059				-69.2693	0.19823
		400	0.01285				-68.1482	0.24211					400	0.01247				-88.1482	0.15126					400	0.00996				-68.1482	0.20173
		402.667	0.01212				-67.027	0.24644					402.667	0.01176				-87.027	0.15467					402.667	0.00936				-67.027	0.20527
		405.333	0.01143				-65.9059	0.25082					405.333	0.01109				-85.9059	0.15813					405.333	0.0088				-65.9059	0.20885
		408	0.01078				-64.7848	0.25524					408	0.01045				-84.7848	0.16165					408	0.00827				-64.7848	0.21248
		410.667	0.01015				-63.6637	0.25972					410.667	0.00984				-83.6637	0.16523					410.667	0.00776				-63.6637	0.21615
		413.333	0.00956				-62.5425	0.26424					413.333	0.00927				-82.5425	0.16887					413.333	0.00729				-62.5425	0.21987
		416	0.00901				-61.4214	0.26881					416	0.00872				-81.4214	0.17257					416	0.00684				-61.4214	0.22362
		418.667	0.00848				-60.3003	0.27343					418.667	0.00821				-80.3003	0.17633					418.667	0.00641				-60.3003	0.22743
		421.333	0.00798				-59.1792	0.2781					421.333	0.00772				-79.1792	0.18014					421.333	0.00601				-59.1792	0.23127
		424	0.0075				-58.0581	0.28282					424	0.00726				-78.0581	0.18402					424	0.00563				-58.0581	0.23517
		426.667	0.00705				-56.9369	0.28758					426.667	0.00682				-76.9369	0.18795					426.667	0.00528				-56.9369	0.2391
		429.333	0.00663				-55.8158	0.2924					429.333	0.0064				-75.8158	0.19195					429.333	0.00494				-55.8158	0.24308
		432	0.00623				-54.6947	0.29726					432	0.00601				-74.6947	0.19601					432	0.00462				-54.6947	0.2471
		434.667	0.00585				-53.5736	0.30216					434.667	0.00565				-73.5736	0.20012					434.667	0.00433				-53.5736	0.25117
		437.333	0.00549				-52.4524	0.30712					437.333	0.0053				-72.4524	0.2043					437.333	0.00405				-52.4524	0.25528
		440	0.00515				-51.3313	0.31212					440	0.00497				-71.3313	0.20854					440	0.00378				-51.3313	0.25943
		442.667	0.00483				-50.2102	0.31717					442.667	0.00466				-70.2102	0.21284					442.667	0.00353				-50.2102	0.26363
		445.333	0.00453				-49.0891	0.32226					445.333	0.00436				-69.0891	0.21719					445.333	0.0033				-49.0891	0.26787
		448	0.00424				-47.968	0.3274					448	0.00409				-67.968	0.22161					448	0.00308				-47.968	0.27215
		450.667	0.00398				-46.8469	0.33258					450.667	0.00383				-66.8469	0.2261					450.667	0.00288				-46.8469	0.27648
		453.333	0.00372				-45.7257	0.33781					453.333	0.00358				-65.7257	0.23064					453.333	0.00268				-45.7257	0.28084
		456	0.00349				-44.6046	0.34308					456	0.00335				-64.6046	0.23524					456	0.0025				-44.6046	0.28526
		458.667	0.00326				-43.4835	0.3484					458.667	0.00314				-63.4835	0.23991					458.667	0.00233				-43.4835	0.28971
		461.333	0.00305				-42.3624	0.35375					461.333	0.00293				-62.3624	0.24463					461.333	0.00217				-42.3624	0.29421
		464	0.00285				-41.2412	0.35916					464	0.00274				-61.2412	0.24942					464	0.00202				-41.2412	0.29875
		466.667	0.00267				-40.1201	0.3646					466.667	0.00256				-60.1201	0.25426					466.667	0.00189				-40.1201	0.30333
		469.333	0.00249				-38.999	0.37008					469.333	0.00239				-58.999	0.25917					469.333	0.00175				-38.999	0.30795
		472	0.00233				-37.8779	0.37561					472	0.00223				-57.8779	0.26414					472	0.00163				-37.8779	0.31261
		474.667	0.00217				-36.7568	0.38117					474.667	0.00208				-56.7568	0.26916					474.667	0.00152				-36.7568	0.31732
		477.333	0.00203				-35.6356	0.38677					477.333	0.00194				-55.6356	0.27425					477.333	0.00141				-35.6356	0.32206
		480	0.00189				-34.5145	0.39242					480	0.00181				-54.5145	0.2794					480	0.00131				-34.5145	0.32685
		482.667	0.00176				-33.3934	0.3981					482.667	0.00169				-53.3934	0.28461					482.667	0.00122				-33.3934	0.33167
		485.333	0.00164				-32.2723	0.40382					485.333	0.00157				-52.2723	0.28987					485.333	0.00113				-32.2723	0.33654
		488	0.00153				-31.1512	0.40957					488	0.00147				-51.1512	0.29519					488	0.00105				-31.1512	0.34144
		490.667	0.00143				-30.03	0.41536					490.667	0.00136				-50.03	0.30058					490.667	0.000972451				-30.03	0.34639
		493.333	0.00133				-28.9089	0.42119					493.333	0.00127				-48.9089	0.30602					493.333	0.000901651				-28.9089	0.35137
		496	0.00124				-27.7878	0.42705					496	0.00118				-47.7878	0.31152					496	0.000835662				-27.7878	0.35639
		498.667	0.00115				-26.6667	0.43294					498.667	0.0011				-46.6667	0.31707					498.667	0.000774186				-26.6667	0.36145
		501.333	0.00107				-25.5455	0.43886					501.333	0.00102				-45.5455	0.32268					501.333	0.000716939				-25.5455	0.36654
		504	0.00099452				-24.4244	0.44482					504	0.000948901				-44.4244	0.32835					504	0.000663653				-24.4244	0.37167
		506.667	0.000924184				-23.3033	0.45081					506.667	0.000881352				-43.3033	0.33407					506.667	0.000614075				-23.3033	0.37684
		509.333	0.000858489				-22.1822	0.45683					509.333	0.000818292				-42.1822	0.33985					509.333	0.000567969				-22.1822	0.38204
		512	0.000797156				-21.0611	0.46287					512	0.000759448				-41.0611	0.34568					512	0.000525109				-21.0611	0.38728
		514.667	0.000739918				-19.9399	0.46895					514.667	0.000704561				-39.9399	0.35157					514.667	0.000485284				-19.9399	0.39256
		517.333	0.000686524				-18.8188	0.47505					517.333	0.000653386				-38.8188	0.3575					517.333	0.000448296				-18.8188	0.39786
		520	0.000636737				-17.6977	0.48117					520	0.000605692				-37.6977	0.36349					520	0.000413958				-17.6977	0.4032
		522.667	0.000590332				-16.5766	0.48733					522.667	0.000561261				-36.5766	0.36953					522.667	0.000382093				-16.5766	0.40858
		525.333	0.000547097				-15.4555	0.4935					525.333	0.000519886				-35.4555	0.37563					525.333	0.000352537				-15.4555	0.41398
		528	0.000506832				-14.3343	0.4997					528	0.000481374				-34.3343	0.38177					528	0.000325134				-14.3343	0.41942
		530.667	0.000469349				-13.2132	0.50592					530.667	0.000445541				-33.2132	0.38796					530.667	0.000299738				-13.2132	0.42489
		533.333	0.000434469				-12.0921	0.51216					533.333	0.000412215				-32.0921	0.39419					533.333	0.000276212				-12.0921	0.43039
		536	0.000402026				-10.971	0.51842					536	0.000381233				-30.971	0.40048					536	0.000254429				-10.971	0.43592
		538.667	0.000371862				-9.84985	0.5247					538.667	0.000352442				-29.8498	0.40681					538.667	0.000234267				-9.84985	0.44147
		541.333	0.000343828				-8.72873	0.53099					541.333	0.000325699				-28.7287	0.41318					541.333	0.000215615				-8.72873	0.44706
		544	0.000317784				-7.60761	0.5373					544	0.000300867				-27.6076	0.4196					544	0.000198367				-7.60761	0.45267
		546.667	0.0002936				-6.48649	0.54362					546.667	0.000277821				-26.4865	0.42606					546.667	0.000182423				-6.48649	0.45831
		549.333	0.000271151				-5.36537	0.54996					549.333	0.000256439				-25.3654	0.43257					549.333	0.000167693				-5.36537	0.46397
		552	0.000250321				-4.24424	0.55631					552	0.000236612				-24.2442	0.43911					552	0.000154088				-4.24424	0.46966
		554.667	0.000231002				-3.12312	0.56267					554.667	0.000218232				-23.1231	0.44569					554.667	0.00014153				-3.12312	0.47538
		557.333	0.000213092				-2.002	0.56904					557.333	0.000201201				-22.002	0.45231					557.333	0.000129942				-2.002	0.48111
		560	0.000196494				-0.88088	0.57542					560	0.000185427				-20.8809	0.45897					560	0.000119253				-0.88088	0.48687
		562.667	0.000181119				0	0.58044					562.667	0.000170824				-20	0.46423					562.667	0.000109399				0	0.49141
		565.333	0.000166882				0.24024	0.5818					565.333	0.000157309				-19.7598	0.46566					565.333	0.000100318				0.24024	0.49265
		568	0.000153705				1.36136	0.58819					568	0.000144807				-18.6386	0.47239					568	9.2e-05				1.36136	0.49846
		570.667	0.000141514				2.48248	0.59459					570.667	0.000133246				-17.5175	0.47915					570.667	8.43e-05				2.48248	0.50428
		573.333	0.000130239				3.6036	0.60098					573.333	0.000122561				-16.3964	0.48594					573.333	7.72e-05				3.6036	0.51012
		576	0.000119816				4.72472	0.60738					576	0.000112689				-15.2753	0.49276					576	7.06e-05				4.72472	0.51598
		578.667	0.000110184				5.84585	0.61378					578.667	0.000103571				-14.1541	0.49961					578.667	6.46e-05				5.84585	0.52185
		581.333	0.000101288				6.96697	0.62018					581.333	9.52e-05				-13.033	0.50649					581.333	5.91e-05				6.96697	0.52774
		584	9.30738e-05				8.08809	0.62657					584	8.74e-05				-11.9119	0.51339					584	5.41e-05				8.08809	0.53365
		586.667	8.54926e-05				9.20921	0.63296					586.667	8.02e-05				-10.7908	0.52031					586.667	4.94e-05				9.20921	0.53957
		589.333	7.84986e-05				10.3303	0.63934					589.333	7.36e-05				-9.66967	0.52726					589.333	4.52e-05				10.3303	0.5455
		592	7.20488e-05				11.4514	0.64572					592	6.75e-05				-8.54855	0.53423					592	4.12e-05				11.4514	0.55145
		594.667	6.61034e-05				12.5726	0.65208					594.667	6.19e-05				-7.42743	0.54122					594.667	3.76e-05				12.5726	0.55741
		597.333	6.06252e-05				13.6937	0.65844					597.333	5.68e-05				-6.30631	0.54823					597.333	3.43e-05				13.6937	0.56337
		600	5.55794e-05				14.8148	0.66478					600	5.2e-05				-5.18519	0.55525					600	3.13e-05				14.8148	0.56935
		602.667	5.09338e-05				15.9359	0.67111					602.667	4.76e-05				-4.06406	0.56228					602.667	2.86e-05				15.9359	0.57533
		605.333	4.66585e-05				17.0571	0.67742					605.333	4.36e-05				-2.94294	0.56933					605.333	2.6e-05				17.0571	0.58132
		608	4.27255e-05				18.1782	0.68372					608	3.99e-05				-1.82182	0.57639					608	2.37e-05				18.1782	0.58731
		610.667	3.91089e-05				19.2993	0.69					610.667	3.65e-05				-0.7007	0.58345					610.667	2.16e-05				19.2993	0.59331
		613.333	3.57845e-05				20.4204	0.69626					613.333	3.34e-05				0.42042	0.59052					613.333	1.97e-05				20.4204	0.59932
		616	3.27301e-05				21.5415	0.7025					616	3.05e-05				1.54154	0.5976					616	1.79e-05				21.5415	0.60532
		618.667	2.99248e-05				22.6627	0.70872					618.667	2.79e-05				2.66266	0.60468					618.667	1.63e-05				22.6627	0.61133
		621.333	2.73493e-05				23.7838	0.71491					621.333	2.55e-05				3.78378	0.61176					621.333	1.48e-05				23.7838	0.61733
		624	2.49859e-05				24.9049	0.72107					624	2.33e-05				4.9049	0.61884					624	1.34e-05				24.9049	0.62334
		626.667	2.28178e-05				26.026	0.72721					626.667	2.12e-05				6.02603	0.62592					626.667	1.22e-05				26.026	0.62934
		629.333	2.08298e-05				27.1471	0.73332					629.333	1.94e-05				7.14715	0.633					629.333	1.11e-05				27.1471	0.63533
		632	1.90076e-05				28.2683	0.7394					632	1.77e-05				8.26827	0.64006					632	1.01e-05				28.2683	0.64133
		634.667	1.73381e-05				29.3894	0.74544					634.667	1.61e-05				9.38939	0.64712					634.667	9.13e-06				29.3894	0.64731
		637.333	1.58091e-05				30.5105	0.75145					637.333	1.47e-05				10.5105	0.65417					637.333	8.28e-06				30.5105	0.65329
		640	1.44094e-05				31.6316	0.75742					640	1.34e-05				11.6316	0.6612					640	7.51e-06				31.6316	0.65926
		642.667	1.31285e-05				32.7527	0.76336					642.667	1.22e-05				12.7528	0.66822					642.667	6.8e-06				32.7527	0.66522
		645.333	1.19569e-05				33.8739	0.76926					645.333	1.11e-05				13.8739	0.67522					645.333	6.16e-06				33.8739	0.67116
		648	1.08856e-05				34.995	0.77512					648	1.01e-05				14.995	0.6822					648	5.58e-06				34.995	0.6771
		650.667	9.90643e-06				36.1161	0.78093					650.667	9.16e-06				16.1161	0.68916					650.667	5.05e-06				36.1161	0.68302
		653.333	9.01185e-06				37.2372	0.7867					653.333	8.33e-06				17.2372	0.6961					653.333	4.57e-06				37.2372	0.68893
		656	8.19488e-06				38.3584	0.79243					656	7.57e-06				18.3584	0.70301					656	4.13e-06				38.3584	0.69481
		658.667	7.44908e-06				39.4795	0.7981					658.667	6.88e-06				19.4795	0.70989					658.667	3.73e-06				39.4795	0.70069
		661.333	6.76853e-06				40.6006	0.80373					661.333	6.24e-06				20.6006	0.71675					661.333	3.37e-06				40.6006	0.70654
		664	6.14777e-06				41.7217	0.80931					664	5.67e-06				21.7217	0.72357					664	3.05e-06				41.7217	0.71237
		666.667	5.58178e-06				42.8428	0.81484					666.667	5.14e-06				22.8428	0.73036					666.667	2.75e-06				42.8428	0.71818
		669.333	5.06593e-06				43.964	0.82031					669.333	4.66e-06				23.964	0.73711					669.333	2.48e-06				43.964	0.72396
		672	4.59597e-06				45.0851	0.82573					672	4.23e-06				25.0851	0.74382					672	2.24e-06				45.0851	0.72973
		674.667	4.16799e-06				46.2062	0.83109					674.667	3.83e-06				26.2062	0.75049					674.667	2.02e-06				46.2062	0.73546
		677.333	3.77839e-06				47.3273	0.8364					677.333	3.47e-06				27.3273	0.75712					677.333	1.82e-06				47.3273	0.74117
		680	3.42389e-06				48.4485	0.84164					680	3.14e-06				28.4485	0.7637					680	1.64e-06				48.4485	0.74685
		682.667	3.10143e-06				49.5696	0.84682					682.667	2.85e-06				29.5696	0.77023					682.667	1.48e-06				49.5696	0.7525
		685.333	2.80826e-06				50.6907	0.85194					685.333	2.58e-06				30.6907	0.77672					685.333	1.33e-06				50.6907	0.75812
		688	2.54181e-06				51.8118	0.857					688	2.33e-06				31.8118	0.78315					688	1.2e-06				51.8118	0.76371
		690.667	2.29974e-06				52.9329	0.86199					690.667	2.11e-06				32.9329	0.78953					690.667	1.08e-06				52.9329	0.76926
		693.333	2.07992e-06				54.054	0.86691					693.333	1.9e-06				34.054	0.79585					693.333	9.68e-07				54.054	0.77478
		696	1.88038e-06				55.1752	0.87176					696	1.72e-06				35.1752	0.80212					696	8.7e-07				55.1752	0.78026
		698.667	1.69931e-06				56.2963	0.87654					698.667	1.55e-06				36.2963	0.80832					698.667	7.81e-07				56.2963	0.7857
		701.333	1.53509e-06				57.4174	0.88126					701.333	1.4e-06				37.4174	0.81446					701.333	7.02e-07				57.4174	0.79111
		704	1.38619e-06				58.5385	0.88589					704	1.27e-06				38.5385	0.82054					704	6.3e-07				58.5385	0.79647
		706.667	1.25125e-06				59.6597	0.89046					706.667	1.14e-06				39.6597	0.82654					706.667	5.65e-07				59.6597	0.80179
		709.333	1.129e-06				60.7808	0.89494					709.333	1.03e-06				40.7808	0.83248					709.333	5.07e-07				60.7808	0.80707
		712	1.01829e-06				61.9019	0.89935					712	9.28e-07				41.9019	0.83835					712	4.54e-07				61.9019	0.8123
		714.667	9.18083e-07				63.023	0.90368					714.667	8.36e-07				43.023	0.84414					714.667	4.07e-07				63.023	0.81749
		717.333	8.27409e-07				64.1441	0.90793					717.333	7.53e-07				44.1441	0.84986					717.333	3.65e-07				64.1441	0.82263
		720	7.45397e-07				65.2653	0.9121					720	6.78e-07				45.2653	0.8555					720	3.27e-07				65.2653	0.82772
							66.3864	0.91619										46.3864	0.86106										66.3864	0.83276
							67.5075	0.92019										47.5075	0.86654										67.5075	0.83775
							68.6286	0.9241										48.6286	0.87193										68.6286	0.84268
							69.7498	0.92793										49.7497	0.87724										69.7498	0.84757
							70.8709	0.93168										50.8709	0.88246										70.8709	0.8524
							71.992	0.93533										51.992	0.88759										71.992	0.85717
							73.1131	0.93889										53.1131	0.89262										73.1131	0.86188
							74.2342	0.94236										54.2342	0.89757										74.2342	0.86654
							75.3554	0.94574										55.3554	0.90241										75.3554	0.87113
							76.4765	0.94903										56.4765	0.90717										76.4765	0.87567
							77.5976	0.95222										57.5976	0.91182										77.5976	0.88014
							78.7187	0.95531										58.7187	0.91637										78.7187	0.88455
							79.8398	0.95831										59.8398	0.92081										79.8398	0.88889
							80	0.95873										60	0.92144										80	0.8895
							80.961	0.96121										60.961	0.92516										80.961	0.89317
							82.0821	0.96402										62.0821	0.92939										82.0821	0.89738
							83.2032	0.96672										63.2032	0.93352										83.2032	0.90152
							84.3243	0.96932										64.3243	0.93754										84.3243	0.90559
							85.4454	0.97183										65.4454	0.94145										85.4454	0.90959
							86.5666	0.97423										66.5666	0.94524										86.5666	0.91352
							87.6877	0.97652										67.6877	0.94892										87.6877	0.91737
							88.8088	0.97872										68.8088	0.95249										88.8088	0.92115
							89.9299	0.98081										69.9299	0.95593										89.9299	0.92486
							91.0511	0.98279										71.0511	0.95926										91.0511	0.92849
							92.1722	0.98467										72.1722	0.96247										92.1722	0.93205
							93.2933	0.98644										73.2933	0.96556										93.2933	0.93552
							94.4144	0.98811										74.4144	0.96853										94.4144	0.93892
							95.5355	0.98967										75.5355	0.97137										95.5355	0.94223
							96.6567	0.99112										76.6567	0.97409										96.6567	0.94547
							97.7778	0.99246										77.7778	0.97668										97.7778	0.94862
							98.8989	0.9937										78.8989	0.97915										98.8989	0.95169
							100.02	0.99482										80.02	0.98148										100.02	0.95468
							101.141	0.99584										81.1411	0.98369										101.141	0.95758
							102.262	0.99674										82.2623	0.98577										102.262	0.9604
							103.383	0.99754										83.3834	0.98772										103.383	0.96313
							104.504	0.99822										84.5045	0.98954										104.504	0.96577
							105.626	0.9988										85.6256	0.99122										105.626	0.96833
							106.747	0.99926										86.7468	0.99278										106.747	0.9708
							107.868	0.99961										87.8679	0.9942										107.868	0.97318
							108.989	0.99985										88.989	0.99548										108.989	0.97547
							110.11	0.99998										90.1101	0.99663										110.11	0.97767
							111.231	1										91.2312	0.99765										111.231	0.97977
							112.352	0.99991										92.3524	0.99853										112.352	0.98179
							113.473	0.99971										93.4735	0.99928										113.473	0.98371
							114.595	0.99939										94.5946	0.99988										114.595	0.98554
							115.716	0.99897										95.7157	1.00036										115.716	0.98728
							116.837	0.99843										96.8368	1.00069										116.837	0.98892
							117.958	0.99778										97.958	1.00089										117.958	0.99047
							119.079	0.99702										99.0791	1.00096										119.079	0.99192
							120.2	0.99615										100.2	1.00088										120.2	0.99328
							121.321	0.99518										101.321	1.00067										121.321	0.99454
							122.442	0.99409										102.442	1.00033										122.442	0.99571
							123.564	0.99289										103.564	0.99985										123.564	0.99678
							124.685	0.99158										104.685	0.99923										124.685	0.99775
							125.806	0.99017										105.806	0.99847										125.806	0.99863
							126.927	0.98865										106.927	0.99758										126.927	0.99941
							128.048	0.98702										108.048	0.99655										128.048	1.00009
							129.169	0.98528										109.169	0.99539										129.169	1.00067
							130.29	0.98344										110.29	0.9941										130.29	1.00116
							131.411	0.98149										111.411	0.99267										131.411	1.00155
							132.533	0.97943										112.533	0.99111										132.533	1.00184
							133.654	0.97727										113.654	0.98941										133.654	1.00203
							134.775	0.97501										114.775	0.98758										134.775	1.00212
							135.896	0.97264										115.896	0.98563										135.896	1.00211
							137.017	0.97018										117.017	0.98354										137.017	1.00201
							138.138	0.96761										118.138	0.98132										138.138	1.00181
							139.259	0.96494										119.259	0.97897										139.259	1.00151
							140.38	0.96217										120.38	0.9765										140.38	1.00111
							141.501	0.9593										121.501	0.9739										141.501	1.00061
							142.623	0.95633										122.623	0.97117										142.623	1.00002
							143.744	0.95327										123.744	0.96832										143.744	0.99933
							144.865	0.95011										124.865	0.96534										144.865	0.99854
							145.986	0.94686										125.986	0.96225										145.986	0.99765
							147.107	0.94351										127.107	0.95903										147.107	0.99667
							148.228	0.94007										128.228	0.95569										148.228	0.99559
							149.349	0.93654										129.349	0.95223										149.349	0.99441
							150.47	0.93291										130.47	0.94866										150.47	0.99314
							151.592	0.9292										131.592	0.94497										151.592	0.99177
							152.713	0.9254										132.713	0.94117										152.713	0.9903
							153.834	0.92151										133.834	0.93725										153.834	0.98875
							154.955	0.91754										134.955	0.93323										154.955	0.98709
							156.076	0.91348										136.076	0.92909										156.076	0.98534
							157.197	0.90934										137.197	0.92485										157.197	0.9835
							158.318	0.90512										138.318	0.9205										158.318	0.98157
							159.439	0.90082										139.439	0.91604										159.439	0.97955
							160	0.89863										140	0.91378										160	0.9785
							160.561	0.89643										140.561	0.91149										160.561	0.97743
							161.682	0.89197										141.682	0.90683										161.682	0.97522
							162.803	0.88744										142.803	0.90207										162.803	0.97292
							163.924	0.88282										143.924	0.89722										163.924	0.97053
							165.045	0.87814										145.045	0.89227										165.045	0.96805
							166.166	0.87338										146.166	0.88722										166.166	0.96549
							167.287	0.86855										147.287	0.88208										167.287	0.96284
							168.408	0.86365										148.408	0.87686										168.408	0.96009
							169.53	0.85868										149.53	0.87155										169.53	0.95727
							170.651	0.85365										150.651	0.86615										170.651	0.95436
							171.772	0.84855										151.772	0.86066										171.772	0.95136
							172.893	0.84339										152.893	0.8551										172.893	0.94828
							174.014	0.83817										154.014	0.84945										174.014	0.94512
							175.135	0.83288										155.135	0.84373										175.135	0.94187
							176.256	0.82754										156.256	0.83793										176.256	0.93855
							177.377	0.82214										157.377	0.83206										177.377	0.93514
							178.499	0.81669										158.499	0.82612										178.499	0.93166
							179.62	0.81118										159.62	0.8201										179.62	0.9281
							180.741	0.80562										160.741	0.81402										180.741	0.92446
							181.862	0.8										161.862	0.80788										181.862	0.92074
							182.983	0.79434										162.983	0.80167										182.983	0.91695
							184.104	0.78863										164.104	0.7954										184.104	0.91309
							185.225	0.78288										165.225	0.78908										185.225	0.90915
							186.346	0.77708										166.346	0.78269										186.346	0.90514
							187.467	0.77123										167.467	0.77626										187.467	0.90107
							188.589	0.76535										168.589	0.76977										188.589	0.89692
							189.71	0.75942										169.71	0.76323										189.71	0.8927
							190.831	0.75346										170.831	0.75664										190.831	0.88842
							191.952	0.74746										171.952	0.75001										191.952	0.88407
							193.073	0.74143										173.073	0.74334										193.073	0.87965
							194.194	0.73537										174.194	0.73662										194.194	0.87517
							195.315	0.72927										175.315	0.72987										195.315	0.87063
							196.436	0.72314										176.436	0.72308										196.436	0.86603
							197.558	0.71698										177.558	0.71626										197.558	0.86137
							198.679	0.7108										178.679	0.7094										198.679	0.85665
							199.8	0.70459										179.8	0.70252										199.8	0.85187
							200.921	0.69836										180.921	0.6956										200.921	0.84703
							202.042	0.69211										182.042	0.68866										202.042	0.84215
							203.163	0.68584										183.163	0.6817										203.163	0.8372
							204.284	0.67954										184.284	0.67472										204.284	0.83221
							205.405	0.67324										185.405	0.66772										205.405	0.82716
							206.527	0.66691										186.527	0.6607										206.527	0.82206
							207.648	0.66057										187.648	0.65366										207.648	0.81692
							208.769	0.65422										188.769	0.64661										208.769	0.81173
							209.89	0.64786										189.89	0.63956										209.89	0.80649
							211.011	0.64149										191.011	0.63249										211.011	0.80121
							212.132	0.6351										192.132	0.62542										212.132	0.79588
							213.253	0.62872										193.253	0.61834										213.253	0.79051
							214.374	0.62233										194.374	0.61126										214.374	0.78511
							215.495	0.61593										195.495	0.60418										215.495	0.77966
							216.617	0.60953										196.617	0.59709										216.617	0.77417
							217.738	0.60314										197.738	0.59002										217.738	0.76865
							218.859	0.59674										198.859	0.58295										218.859	0.7631
							219.98	0.59034										199.98	0.57588										219.98	0.75751
							221.101	0.58395										201.101	0.56882										221.101	0.75188
							222.222	0.57757										202.222	0.56178										222.222	0.74623
							223.343	0.57119										203.343	0.55474										223.343	0.74055
							224.464	0.56481										204.464	0.54772										224.464	0.73483
							225.586	0.55845										205.586	0.54072										225.586	0.7291
							226.707	0.5521										206.707	0.53373										226.707	0.72333
							227.828	0.54575										207.828	0.52676										227.828	0.71754
							228.949	0.53942										208.949	0.51982										228.949	0.71173
							230.07	0.53311										210.07	0.51289										230.07	0.7059
							231.191	0.52681										211.191	0.50599										231.191	0.70004
							232.312	0.52053										212.312	0.49912										232.312	0.69417
							233.433	0.51426										213.433	0.49227										233.433	0.68828
							234.555	0.50802										214.555	0.48545										234.555	0.68237
							235.676	0.50179										215.676	0.47866										235.676	0.67645
							236.797	0.49558										216.797	0.47191										236.797	0.67051
							237.918	0.4894										217.918	0.46518										237.918	0.66456
							239.039	0.48324										219.039	0.45849										239.039	0.6586
							240	0.47798										220	0.45279										240	0.65349
							240.16	0.47711										220.16	0.45184										240.16	0.65263
							241.281	0.471										221.281	0.44522										241.281	0.64665
							242.402	0.46491										222.402	0.43864										242.402	0.64067
							243.524	0.45886										223.524	0.4321										243.524	0.63467
							244.645	0.45283										224.645	0.4256										244.645	0.62868
							245.766	0.44683										225.766	0.41914										245.766	0.62268
							246.887	0.44086										226.887	0.41273										246.887	0.61667
							248.008	0.43493										228.008	0.40635										248.008	0.61067
							249.129	0.42902										229.129	0.40003										249.129	0.60466
							250.25	0.42315										230.25	0.39375										250.25	0.59866
							251.371	0.41732										231.371	0.38751										251.371	0.59265
							252.492	0.41151										232.492	0.38133										252.492	0.58666
							253.614	0.40575										233.614	0.37519										253.614	0.58066
							254.735	0.40002										234.735	0.3691										254.735	0.57467
							255.856	0.39432										235.856	0.36306										255.856	0.56869
							256.977	0.38867										236.977	0.35708										256.977	0.56272
							258.098	0.38305										238.098	0.35114										258.098	0.55675
							259.219	0.37747										239.219	0.34526										259.219	0.5508
							260.34	0.37193										240.34	0.33943										260.34	0.54485
							261.461	0.36644										241.461	0.33366										261.461	0.53892
							262.583	0.36098										242.583	0.32794										262.583	0.533
							263.704	0.35557										243.704	0.32228										263.704	0.52709
							264.825	0.35019										244.825	0.31667										264.825	0.52121
							265.946	0.34486										245.946	0.31112										265.946	0.51533
							267.067	0.33958										247.067	0.30563										267.067	0.50948
							268.188	0.33433										248.188	0.30019										268.188	0.50364
							269.309	0.32914										249.309	0.29481										269.309	0.49782
							270.43	0.32398										250.43	0.28949										270.43	0.49202
							271.552	0.31887										251.552	0.28423										271.552	0.48624
							272.673	0.31381										252.673	0.27903										272.673	0.48048
							273.794	0.3088										253.794	0.27389										273.794	0.47475
							274.915	0.30382										254.915	0.2688										274.915	0.46904
							276.036	0.2989										256.036	0.26378										276.036	0.46335
							277.157	0.29402										257.157	0.25882										277.157	0.45769
							278.278	0.2892										258.278	0.25391										278.278	0.45205
							279.399	0.28441										259.399	0.24907										279.399	0.44644
							280.521	0.27968										260.521	0.24429										280.521	0.44086
							281.642	0.275										261.642	0.23957										281.642	0.43531
							282.763	0.27036										262.763	0.23491										282.763	0.42978
							283.884	0.26577										263.884	0.23031										283.884	0.42429
							285.005	0.26123										265.005	0.22577										285.005	0.41882
							286.126	0.25674										266.126	0.2213										286.126	0.41339
							287.247	0.2523										267.247	0.21688										287.247	0.40799
							288.368	0.24791										268.368	0.21253										288.368	0.40262
							289.489	0.24356										269.489	0.20823										289.489	0.39728
							290.611	0.23927										270.611	0.204										290.611	0.39198
							291.732	0.23503										271.732	0.19983										291.732	0.38671
							292.853	0.23083										272.853	0.19571										292.853	0.38147
							293.974	0.22669										273.974	0.19166										293.974	0.37627
							295.095	0.22259										275.095	0.18767										295.095	0.37111
							296.216	0.21855										276.216	0.18374										296.216	0.36598
							297.337	0.21455										277.337	0.17987										297.337	0.36089
							298.458	0.21061										278.458	0.17606										298.458	0.35584
							299.58	0.20671										279.58	0.1723										299.58	0.35082
							300.701	0.20286										280.701	0.16861										300.701	0.34584
							301.822	0.19907										281.822	0.16497										301.822	0.3409
							302.943	0.19532										282.943	0.1614										302.943	0.336
							304.064	0.19162										284.064	0.15788										304.064	0.33114
							305.185	0.18797										285.185	0.15442										305.185	0.32632
							306.306	0.18437										286.306	0.15102										306.306	0.32154
							307.427	0.18082										287.427	0.14767										307.427	0.3168
							308.549	0.17731										288.549	0.14438										308.549	0.3121
							309.67	0.17386										289.67	0.14115										309.67	0.30744
							310.791	0.17045										290.791	0.13797										310.791	0.30282
							311.912	0.16709										291.912	0.13485										311.912	0.29825
							313.033	0.16378										293.033	0.13178										313.033	0.29371
							314.154	0.16052										294.154	0.12877										314.154	0.28922
							315.275	0.15731										295.275	0.12581										315.275	0.28477
							316.396	0.15414										296.396	0.12291										316.396	0.28036
							317.518	0.15102										297.518	0.12005										317.518	0.276
							318.639	0.14794										298.639	0.11726										318.639	0.27168
							319.76	0.14492										299.76	0.11451										319.76	0.2674
							320	0.14427										300	0.11393										320	0.26649
							320.881	0.14193										300.881	0.11181										320.881	0.26316
							322.002	0.139										302.002	0.10917										322.002	0.25897
							323.123	0.13611										303.123	0.10658										323.123	0.25482
							324.244	0.13326										304.244	0.10403										324.244	0.25072
							325.365	0.13046										305.365	0.10154										325.365	0.24666
							326.486	0.12771										306.486	0.09909										326.486	0.24264
							327.608	0.125										307.608	0.09669										327.608	0.23867
							328.729	0.12233										308.729	0.09434										328.729	0.23474
							329.85	0.11971										309.85	0.09204										329.85	0.23085
							330.971	0.11713										310.971	0.08979										330.971	0.22701
							332.092	0.11459										312.092	0.08758										332.092	0.22321
							333.213	0.1121										313.213	0.08541										333.213	0.21946
							334.334	0.10964										314.334	0.08329										334.334	0.21574
							335.455	0.10723										315.455	0.08122										335.455	0.21208
							336.577	0.10486										316.577	0.07919										336.577	0.20846
							337.698	0.10253										317.698	0.0772										337.698	0.20488
							338.819	0.10025										318.819	0.07525										338.819	0.20134
							339.94	0.098										319.94	0.07335										339.94	0.19785
							341.061	0.09579										321.061	0.07149										341.061	0.1944
							342.182	0.09362										322.182	0.06966										342.182	0.19099
							343.303	0.09149										323.303	0.06788										343.303	0.18763
							344.424	0.0894										324.424	0.06614										344.424	0.18431
							345.546	0.08735										325.546	0.06444										345.546	0.18104
							346.667	0.08533										326.667	0.06277										346.667	0.17781
							347.788	0.08335										327.788	0.06114										347.788	0.17461
							348.909	0.08141										328.909	0.05955										348.909	0.17147
							350.03	0.07951										330.03	0.058										350.03	0.16836
							351.151	0.07764										331.151	0.05648										351.151	0.1653
							352.272	0.0758										332.272	0.055										352.272	0.16228
							353.393	0.074										333.393	0.05355										353.393	0.1593
							354.515	0.07224										334.515	0.05214										354.515	0.15636
							355.636	0.07051										335.636	0.05076										355.636	0.15346
							356.757	0.06881										336.757	0.04941										356.757	0.15061
							357.878	0.06715										337.878	0.04809										357.878	0.14779
							358.999	0.06552										338.999	0.04681										358.999	0.14502
							360.12	0.06392										340.12	0.04556										360.12	0.14229
							361.241	0.06236										341.241	0.04434										361.241	0.13959
							362.362	0.06082										342.362	0.04315										362.362	0.13694
							363.483	0.05932										343.483	0.04199										363.483	0.13433
							364.605	0.05785										344.605	0.04085										364.605	0.13175
							365.726	0.05641										345.726	0.03975										365.726	0.12922
							366.847	0.055										346.847	0.03867										366.847	0.12672
							367.968	0.05361										347.968	0.03762										367.968	0.12426
							369.089	0.05226										349.089	0.0366										369.089	0.12184
							370.21	0.05094										350.21	0.03561										370.21	0.11946
							371.331	0.04964										351.331	0.03464										371.331	0.11711
							372.452	0.04837										352.452	0.03369										372.452	0.11481
							373.574	0.04713										353.574	0.03277										373.574	0.11254
							374.695	0.04591										354.695	0.03188										374.695	0.1103
							375.816	0.04472										355.816	0.03101										375.816	0.1081
							376.937	0.04356										356.937	0.03016										376.937	0.10594
							378.058	0.04242										358.058	0.02933										378.058	0.10382
							379.179	0.04131										359.179	0.02853										379.179	0.10173
							380.3	0.04022										360.3	0.02775										380.3	0.09967
							381.421	0.03916										361.421	0.02699										381.421	0.09765
							382.543	0.03812										362.543	0.02625										382.543	0.09566
							383.664	0.0371										363.664	0.02553										383.664	0.09371
							384.785	0.03611										364.785	0.02483										384.785	0.09179
							385.906	0.03514										365.906	0.02415										385.906	0.0899
							387.027	0.03419										367.027	0.02349										387.027	0.08805
							388.148	0.03327										368.148	0.02285										388.148	0.08623
							389.269	0.03236										369.269	0.02222										389.269	0.08444
							390.39	0.03148										370.39	0.02162										390.39	0.08268
							391.512	0.03061										371.512	0.02103										391.512	0.08096
							392.633	0.02977										372.633	0.02046										392.633	0.07927
							393.754	0.02895										373.754	0.0199										393.754	0.0776
							394.875	0.02815										374.875	0.01936										394.875	0.07597
							395.996	0.02736										375.996	0.01884										395.996	0.07436
							397.117	0.0266										377.117	0.01833										397.117	0.07279
							398.238	0.02585										378.238	0.01784										398.238	0.07125
							399.359	0.02512										379.359	0.01736										399.359	0.06973
							400	0.02472										380	0.01709										400	0.06888
							400.48	0.02441										380.48	0.01689										400.48	0.06824
							401.602	0.02372										381.602	0.01644										401.602	0.06678
							402.723	0.02304										382.723	0.01601										402.723	0.06535
							403.844	0.02238										383.844	0.01558										403.844	0.06395
							404.965	0.02174										384.965	0.01517										404.965	0.06257
							406.086	0.02112										386.086	0.01478										406.086	0.06122
							407.207	0.02051										387.207	0.01439										407.207	0.0599
							408.328	0.01991										388.328	0.01402										408.328	0.0586
							409.449	0.01933										389.449	0.01365										409.449	0.05733
							410.571	0.01876										390.571	0.0133										410.571	0.05608
							411.692	0.01821										391.692	0.01296										411.692	0.05486
							412.813	0.01768										392.813	0.01263										412.813	0.05366
							413.934	0.01715										393.934	0.01231										413.934	0.05249
							415.055	0.01665										395.055	0.01201										415.055	0.05134
							416.176	0.01615										396.176	0.01171										416.176	0.05021
							417.297	0.01567										397.297	0.01142										417.297	0.04911
							418.418	0.0152										398.418	0.01114										418.418	0.04803
							419.54	0.01474										399.54	0.01087										419.54	0.04697
							420.661	0.01429										400.661	0.0106										420.661	0.04594
							421.782	0.01386										401.782	0.01035										421.782	0.04492
							422.903	0.01344										402.903	0.0101										422.903	0.04393
							424.024	0.01303										404.024	0.00987										424.024	0.04296
							425.145	0.01263										405.145	0.00964										425.145	0.04201
							426.266	0.01224										406.266	0.00942										426.266	0.04107
							427.387	0.01186										407.387	0.0092										427.387	0.04016
							428.509	0.0115										408.509	0.00899										428.509	0.03927
							429.63	0.01114										409.63	0.00879										429.63	0.0384
							430.751	0.01079										410.751	0.0086										430.751	0.03755
							431.872	0.01045										411.872	0.00841										431.872	0.03671
							432.993	0.01012										412.993	0.00823										432.993	0.0359
							434.114	0.00981										414.114	0.00806										434.114	0.0351
							435.235	0.0095										415.235	0.00789										435.235	0.03432
							436.356	0.00919										416.356	0.00773										436.356	0.03356
							437.477	0.0089										417.477	0.00757										437.477	0.03281
							438.599	0.00862										418.599	0.00742										438.599	0.03209
							439.72	0.00834										419.72	0.00727										439.72	0.03137
							440.841	0.00807										420.841	0.00713										440.841	0.03068
							441.962	0.00781										421.962	0.00699										441.962	0.03
							443.083	0.00756										423.083	0.00686										443.083	0.02934
							444.204	0.00731										424.204	0.00674										444.204	0.02869
							445.325	0.00708										425.325	0.00661										445.325	0.02805
							446.446	0.00685										426.446	0.0065										446.446	0.02744
							447.568	0.00662										427.568	0.00638										447.568	0.02683
							448.689	0.0064										428.689	0.00627										448.689	0.02624
							449.81	0.00619										429.81	0.00617										449.81	0.02567
							450.931	0.00599										430.931	0.00607										450.931	0.0251
							452.052	0.00579										432.052	0.00597										452.052	0.02456
							453.173	0.0056										433.173	0.00587										453.173	0.02402
							454.294	0.00541										434.294	0.00578										454.294	0.0235
							455.415	0.00523										435.415	0.0057										455.415	0.02299
							456.537	0.00505										436.537	0.00561										456.537	0.02249
							457.658	0.00488										437.658	0.00553										457.658	0.02201
							458.779	0.00472										438.779	0.00545										458.779	0.02153
							459.9	0.00456										439.9	0.00538										459.9	0.02107
							461.021	0.0044										441.021	0.0053										461.021	0.02062
							462.142	0.00425										442.142	0.00524										462.142	0.02018
							463.263	0.0041										443.263	0.00517										463.263	0.01975
							464.384	0.00396										444.384	0.0051										464.384	0.01934
							465.506	0.00383										445.506	0.00504										465.506	0.01893
							466.627	0.00369										446.627	0.00498										466.627	0.01853
							467.748	0.00357										447.748	0.00493										467.748	0.01815
							468.869	0.00344										448.869	0.00487										468.869	0.01777
							469.99	0.00332										449.99	0.00482										469.99	0.0174
							471.111	0.0032										451.111	0.00477										471.111	0.01705
							472.232	0.00309										452.232	0.00472										472.232	0.0167
							473.353	0.00298										453.353	0.00467										473.353	0.01636
							474.474	0.00288										454.474	0.00463										474.474	0.01603
							475.596	0.00278										455.596	0.00458										475.596	0.01571
							476.717	0.00268										456.717	0.00454										476.717	0.01539
							477.838	0.00258										457.838	0.0045										477.838	0.01509
							478.959	0.00249										458.959	0.00446										478.959	0.01479
							480	0.00241										460	0.00443										480	0.01452
							480.08	0.0024										460.08	0.00443										480.08	0.0145
							481.201	0.00231										461.201	0.00439										481.201	0.01422
							482.322	0.00223										462.322	0.00436										482.322	0.01395
							483.443	0.00215										463.443	0.00432										483.443	0.01368
							484.565	0.00207										464.565	0.00429										484.565	0.01342
							485.686	0.002										465.686	0.00426										485.686	0.01317
							486.807	0.00192										466.807	0.00423										486.807	0.01293
							487.928	0.00185										467.928	0.00421										487.928	0.01269
							489.049	0.00179										469.049	0.00418										489.049	0.01246
							490.17	0.00172										470.17	0.00415										490.17	0.01223
							491.291	0.00166										471.291	0.00413										491.291	0.01201
							492.412	0.00159										472.412	0.00411										492.412	0.0118
							493.534	0.00154										473.534	0.00408										493.534	0.01159
							494.655	0.00148										474.655	0.00406										494.655	0.01139
							495.776	0.00142										475.776	0.00404										495.776	0.01119
							496.897	0.00137										476.897	0.00402										496.897	0.011
							498.018	0.00132										478.018	0.004										498.018	0.01082
							499.139	0.00127										479.139	0.00399										499.139	0.01064
							500.26	0.00122										480.26	0.00397										500.26	0.01046
							501.381	0.00118										481.381	0.00395										501.381	0.01029
							502.502	0.00113										482.502	0.00394										502.502	0.01013
							503.624	0.00109										483.624	0.00392										503.624	0.00997
							504.745	0.00105										484.745	0.00391										504.745	0.00981
							505.866	0.00101										485.866	0.00389										505.866	0.00966
							506.987	0.0009677										486.987	0.00388										506.987	0.00952
							508.108	0.000930532										488.108	0.00387										508.108	0.00938
							509.229	0.0008947										489.229	0.00386										509.229	0.00924
							510.35	0.00086016										490.35	0.00384										510.35	0.0091
							511.471	0.000826869										491.471	0.00383										511.471	0.00897
							512.593	0.000794787										492.593	0.00382										512.593	0.00885
							513.714	0.000763872										493.714	0.00381										513.714	0.00873
							514.835	0.000734087										494.835	0.0038										514.835	0.00861
							515.956	0.000705392										495.956	0.00379										515.956	0.00849
							517.077	0.000677752										497.077	0.00378										517.077	0.00838
							518.198	0.00065113										498.198	0.00378										518.198	0.00827
							519.319	0.000625493										499.319	0.00377										519.319	0.00817
							520.44	0.000600807										500.44	0.00376										520.44	0.00807
							521.562	0.000577039										501.562	0.00375										521.562	0.00797
							522.683	0.000554158										502.683	0.00375										522.683	0.00787
							523.804	0.000532134										503.804	0.00374										523.804	0.00778
							524.925	0.000510937										504.925	0.00373										524.925	0.00769
							526.046	0.000490538										506.046	0.00373										526.046	0.0076
							527.167	0.000470909										507.167	0.00372										527.167	0.00752
							528.288	0.000452024										508.288	0.00372										528.288	0.00744
							529.409	0.000433857										509.409	0.00371										529.409	0.00736
							530.531	0.000416382										510.531	0.00371										530.531	0.00728
							531.652	0.000399576										511.652	0.0037										531.652	0.0072
							532.773	0.000383413										512.773	0.0037										532.773	0.00713
							533.894	0.000367873										513.894	0.00369										533.894	0.00706
							535.015	0.000352932										515.015	0.00369										535.015	0.007
							536.136	0.000338568										516.136	0.00368										536.136	0.00693
							537.257	0.000324762										517.257	0.00368										537.257	0.00687
							538.378	0.000311494										518.378	0.00368										538.378	0.00681
							539.5	0.000298743										519.5	0.00367										539.5	0.00675
							540.621	0.000286491										520.621	0.00367										540.621	0.00669
							541.742	0.00027472										521.742	0.00367										541.742	0.00663
							542.863	0.000263413										522.863	0.00366										542.863	0.00658
							543.984	0.000252552										523.984	0.00366										543.984	0.00653
							545.105	0.000242121										525.105	0.00366										545.105	0.00648
							546.226	0.000232104										526.226	0.00366										546.226	0.00643
							547.347	0.000222486										527.347	0.00365										547.347	0.00638
							548.468	0.000213252										528.468	0.00365										548.468	0.00634
							549.59	0.000204388										529.59	0.00365										549.59	0.00629
							550.711	0.00019588										530.711	0.00365										550.711	0.00625
							551.832	0.000187714										531.832	0.00364										551.832	0.00621
							552.953	0.000179879										532.953	0.00364										552.953	0.00617
							554.074	0.00017236										534.074	0.00364										554.074	0.00613
							555.195	0.000165147										535.195	0.00364										555.195	0.00609
							556.316	0.000158228										536.316	0.00364										556.316	0.00606
							557.437	0.000151591										537.437	0.00364										557.437	0.00602
							558.559	0.000145226										538.559	0.00363										558.559	0.00599
							559.68	0.000139123										539.68	0.00363										559.68	0.00596
							560	0.000137425										540	0.00363										560	0.00595
							560.801	0.00013327										540.801	0.00363										560.801	0.00593
							561.922	0.00012766										541.922	0.00363										561.922	0.0059
							563.043	0.000122281										543.043	0.00363										563.043	0.00587
							564.164	0.000117126										544.164	0.00363										564.164	0.00584
							565.285	0.000112186										545.285	0.00363										565.285	0.00581
							566.406	0.000107451										546.406	0.00363										566.406	0.00579
							567.528	0.000102915										547.528	0.00362										567.528	0.00576
							568.649	9.85694e-05										548.649	0.00362										568.649	0.00574
							569.77	9.44064e-05										549.77	0.00362										569.77	0.00571
							570.891	9.04191e-05										550.891	0.00362										570.891	0.00569
							572.012	8.66004e-05										552.012	0.00362										572.012	0.00567
							573.133	8.29437e-05										553.133	0.00362										573.133	0.00565
							574.254	7.94424e-05										554.254	0.00362										574.254	0.00563
							575.375	7.60905e-05										555.375	0.00362										575.375	0.00561
							576.496	7.28818e-05										556.496	0.00362										576.496	0.00559
							577.618	6.98107e-05										557.618	0.00362										577.618	0.00557
							578.739	6.68716e-05										558.739	0.00362										578.739	0.00555
							579.86	6.4059e-05										559.86	0.00362										579.86	0.00554
							580.981	6.1368e-05										560.981	0.00362										580.981	0.00552
							582.102	5.87935e-05										562.102	0.00362										582.102	0.0055
							583.223	5.63308e-05										563.223	0.00362										583.223	0.00549
							584.344	5.39753e-05										564.344	0.00361										584.344	0.00547
							585.465	5.17227e-05										565.465	0.00361										585.465	0.00546
							586.587	4.95685e-05										566.587	0.00361										586.587	0.00545
							587.708	4.75089e-05										567.708	0.00361										587.708	0.00543
							588.829	4.55399e-05										568.829	0.00361										588.829	0.00542
							589.95	4.36576e-05										569.95	0.00361										589.95	0.00541
							591.071	4.18586e-05										571.071	0.00361										591.071	0.0054
							592.192	4.01393e-05										572.192	0.00361										592.192	0.00538
							593.313	3.84964e-05										573.313	0.00361										593.313	0.00537
							594.434	3.69266e-05										574.434	0.00361										594.434	0.00536
							595.556	3.5427e-05										575.556	0.00361										595.556	0.00535
							596.677	3.39944e-05										576.677	0.00361										596.677	0.00534
							597.798	3.26262e-05										577.798	0.00361										597.798	0.00533
							598.919	3.13194e-05										578.919	0.00361										598.919	0.00532
							600.04	3.00717e-05										580.04	0.00361										600.04	0.00532
							601.161	2.88803e-05										581.161	0.00361										601.161	0.00531
							602.282	2.77429e-05										582.282	0.00361										602.282	0.0053
							603.403	2.66572e-05										583.403	0.00361										603.403	0.00529
							604.525	2.56209e-05										584.525	0.00361										604.525	0.00528
							605.646	2.46319e-05										585.646	0.00361										605.646	0.00528
							606.767	2.36882e-05										586.767	0.00361										606.767	0.00527
							607.888	2.27878e-05										587.888	0.00361										607.888	0.00526
							609.009	2.19287e-05										589.009	0.00361										609.009	0.00526
							610.13	2.11093e-05										590.13	0.00361										610.13	0.00525
							611.251	2.03277e-05										591.251	0.00361										611.251	0.00525
							612.372	1.95824e-05										592.372	0.00361										612.372	0.00524
							613.493	1.88716e-05										593.493	0.00361										613.493	0.00523
							614.615	1.81939e-05										594.615	0.00361										614.615	0.00523
							615.736	1.75479e-05										595.736	0.00361										615.736	0.00522
							616.857	1.6932e-05										596.857	0.00361										616.857	0.00522
							617.978	1.6345e-05										597.978	0.00361										617.978	0.00521
							619.099	1.57856e-05										599.099	0.00361										619.099	0.00521
							620.22	1.52525e-05										600.22	0.00361										620.22	0.00521
							621.341	1.47446e-05										601.341	0.00361										621.341	0.0052
							622.462	1.42607e-05										602.462	0.00361										622.462	0.0052
							623.584	1.37998e-05										603.584	0.00361										623.584	0.00519
							624.705	1.33608e-05										604.705	0.00361										624.705	0.00519
							625.826	1.29426e-05										605.826	0.00361										625.826	0.00519
							626.947	1.25445e-05										606.947	0.00361										626.947	0.00518
							628.068	1.21654e-05										608.068	0.00361										628.068	0.00518
							629.189	1.18045e-05										609.189	0.00361										629.189	0.00518
							630.31	1.1461e-05										610.31	0.00361										630.31	0.00517
							631.431	1.1134e-05										611.431	0.00361										631.431	0.00517
							632.553	1.08228e-05										612.553	0.00361										632.553	0.00517
							633.674	1.05267e-05										613.674	0.00361										633.674	0.00517
							634.795	1.02449e-05										614.795	0.00361										634.795	0.00516
							635.916	9.97688e-06										615.916	0.00361										635.916	0.00516
							637.037	9.7219e-06										617.037	0.00361										637.037	0.00516
							638.158	9.47938e-06										618.158	0.00361										638.158	0.00516
							639.279	9.24873e-06										619.279	0.00361										639.279	0.00515
							640	9.10647e-06										620	0.00361										640	0.00515
							640.4	9.0294e-06										620.4	0.00361										640.4	0.00515
							641.522	8.82086e-06										621.522	0.00361										641.522	0.00515
							642.643	8.6226e-06										622.643	0.00361										642.643	0.00515
							643.764	8.43414e-06										623.764	0.00361										643.764	0.00515
							644.885	8.25501e-06										624.885	0.00361										644.885	0.00515
							646.006	8.08476e-06										626.006	0.00361										646.006	0.00514
							647.127	7.92299e-06										627.127	0.00361										647.127	0.00514
							648.248	7.76928e-06										628.248	0.00361										648.248	0.00514
							649.369	7.62325e-06										629.369	0.00361										649.369	0.00514
							650.49	7.48453e-06										630.49	0.00361										650.49	0.00514
							651.612	7.35277e-06										631.612	0.00361										651.612	0.00514
							652.733	7.22764e-06										632.733	0.00361										652.733	0.00514
							653.854	7.10881e-06										633.854	0.00361										653.854	0.00513
							654.975	6.99599e-06										634.975	0.00361										654.975	0.00513
							656.096	6.88888e-06										636.096	0.00361										656.096	0.00513
							657.217	6.78719e-06										637.217	0.00361										657.217	0.00513
							658.338	6.69068e-06										638.338	0.00361										658.338	0.00513
							659.459	6.59909e-06										639.459	0.00361										659.459	0.00513
							660.581	6.51217e-06										640.581	0.00361										660.581	0.00513
							661.702	6.4297e-06										641.702	0.00361										661.702	0.00513
							662.823	6.35146e-06										642.823	0.00361										662.823	0.00513
							663.944	6.27723e-06										643.944	0.00361										663.944	0.00513
							665.065	6.20683e-06										645.065	0.00361										665.065	0.00512
							666.186	6.14007e-06										646.186	0.00361										666.186	0.00512
							667.307	6.07675e-06										647.307	0.00361										667.307	0.00512
							668.428	6.01672e-06										648.428	0.00361										668.428	0.00512
							669.55	5.9598e-06										649.55	0.00361										669.55	0.00512
							670.671	5.90585e-06										650.671	0.00361										670.671	0.00512
							671.792	5.85471e-06										651.792	0.00361										671.792	0.00512
							672.913	5.80624e-06										652.913	0.00361										672.913	0.00512
							674.034	5.76031e-06										654.034	0.00361										674.034	0.00512
							675.155	5.71679e-06										655.155	0.00361										675.155	0.00512
							676.276	5.67556e-06										656.276	0.00361										676.276	0.00512
							677.397	5.6365e-06										657.397	0.00361										677.397	0.00512
							678.519	5.5995e-06										658.519	0.00361										678.519	0.00512
							679.64	5.56446e-06										659.64	0.00361										679.64	0.00512
							680.761	5.53128e-06										660.761	0.00361										680.761	0.00512
							681.882	5.49987e-06										661.882	0.00361										681.882	0.00512
							683.003	5.47012e-06										663.003	0.00361										683.003	0.00512
							684.124	5.44196e-06										664.124	0.00361										684.124	0.00512
							685.245	5.41531e-06										665.245	0.00361										685.245	0.00511
							686.366	5.39009e-06										666.366	0.00361										686.366	0.00511
							687.487	5.36621e-06										667.487	0.00361										687.487	0.00511
							688.609	5.34363e-06										668.609	0.00361										688.609	0.00511
							689.73	5.32226e-06										669.73	0.00361										689.73	0.00511
							690.851	5.30204e-06										670.851	0.00361										690.851	0.00511
							691.972	5.28292e-06										671.972	0.00361										691.972	0.00511
							693.093	5.26483e-06										673.093	0.00361										693.093	0.00511
							694.214	5.24773e-06										674.214	0.00361										694.214	0.00511
							695.335	5.23156e-06										675.335	0.00361										695.335	0.00511
							696.456	5.21627e-06										676.456	0.00361										696.456	0.00511
							697.578	5.20182e-06										677.578	0.00361										697.578	0.00511
							698.699	5.18815e-06										678.699	0.00361										698.699	0.00511
							699.82	5.17524e-06										679.82	0.00361										699.82	0.00511
							700.941	5.16304e-06										680.941	0.00361										700.941	0.00511
							702.062	5.15151e-06										682.062	0.00361										702.062	0.00511
							703.183	5.14061e-06										683.183	0.00361										703.183	0.00511
							704.304	5.13032e-06										684.304	0.00361										704.304	0.00511
							720	5.03416e-06										700	0.00361										720	0.00511

## Sheet: Figure.2B
position (nm)	normalized position distribution probability of GFP-MCAK	normalized position distribution probability of EB1-GFP	normalized position distribution probability of XMAP215-GFP		position (nm)	Gaussian fit to the position distribution probability of GFP-MCAK		position (nm)	exponentially modified Gaussian fit to the position distribution probability of EB1-GFP		position (nm)	Gaussian fit to the position distribution probability of XMAP215-GFP				dwell time of proximally distributed GFP-MCAK	dwell time of distally distributed GFP-MCAK	the two-tailed Mann-Whitney U test with Bonferroni correction
380	0	0	0		380	0.03243		380	0.00354		380	0.01031				1.4	0.5	τproximal<->τdistal :p>1
340	0	0	0.04877		373.939	0.03597		379	0.00355		373.939	0.01062				0.4	0.7
300	0.08333	0	0.07318		367.879	0.04023		378	0.00356		367.879	0.01109				0.6	0.8
260	0.5	0.11903	0.31708		361.818	0.04536		377	0.00356		361.818	0.01177				2.8	0.3
220	0.70833	0.40476	0.73172		355.758	0.05147		376	0.00357		355.758	0.01276				0.5	0.3
180	0.875	0.71427	1		349.697	0.05875		375	0.00358		349.697	0.01419				1	0.3
140	1	1	0.82929		343.636	0.06732		374	0.00359		343.636	0.01619				0.3	0.4
100	0.83333	0.90476	0.2927		337.576	0.07733		373	0.0036		337.576	0.01898				0.4	1.7
60	0.5	0.54762	0.12195		331.515	0.08898		372	0.00361		331.515	0.02283				0.4	1.5
20	0.29167	0.19048	0		325.455	0.10237		371	0.00362		325.455	0.028				0.5	0.7
-20	0.08333	0.28573	0.02438		319.394	0.11776		370	0.00363		319.394	0.03491				0.4	0.4
-60	0.04167	0.16665	0		313.333	0.13526		369	0.00365		313.333	0.04396				0.8	0.5
-100	0.08333	0.02379	0.02438		307.273	0.15502		368	0.00366		307.273	0.05566				0.5	0.5
-140	0.125	0.02379	0		301.212	0.17713		367	0.00367		301.212	0.07053				0.2	1.3
-180	0	0	0		295.152	0.20177		366	0.00369		295.152	0.08917				0.6	0.4
-220	0	0	0		289.091	0.22891		365	0.00371		289.091	0.11211				3	0.4
					283.03	0.25867		364	0.00373		283.03	0.13994				0.6	1.3
					276.97	0.291		363	0.00375		276.97	0.17307				1	1
					270.909	0.32589		362	0.00377		270.909	0.21196				0.4	1.1
					264.848	0.36315		361	0.00379		264.848	0.25674				0.5	0.3
					258.788	0.40266		360	0.00382		258.788	0.3074				1.3	0.6
					252.727	0.44417		359	0.00384		252.727	0.36367				0.7	0.3
					246.667	0.48733		358	0.00387		246.667	0.42495				0.7	0.7
					240.606	0.53181		357	0.0039		240.606	0.49034				0.3	0.5
					234.545	0.57723		356	0.00393		234.545	0.55859				0.4	0.7
					228.485	0.62305		355	0.00397		228.485	0.62816				0.6	2.1
					222.424	0.66872		354	0.00401		222.424	0.69726				0.5	1.4
					216.364	0.71372		353	0.00405		216.364	0.76388				0.5	1
					210.303	0.75749		352	0.00409		210.303	0.82591				0.4
					204.242	0.79931		351	0.00414		204.242	0.88119				0.5
					198.182	0.83862		350	0.00419		198.182	0.92784				0.4
					192.121	0.87485		349	0.00424		192.121	0.96404				0.4
					186.061	0.90738		348	0.0043		186.061	0.9884				0.3
					180	0.9357		347	0.00436		180	1				1.6
					173.939	0.95931		346	0.00442		173.939	0.99833				0.9
					167.879	0.97783		345	0.00451		167.879	0.9835				0.4
					161.818	0.99092		344	0.00455		161.818	0.95608				0.5
					155.758	0.99836		343	0.00464		155.758	0.91715				0.4
					149.697	1		342	0.00473		149.697	0.8682				0.7
					143.636	0.99589		341	0.00482		143.636	0.81104				0.4
					137.576	0.98599		340	0.00491		137.576	0.74769				1
					131.515	0.97055		339	0.00499		131.515	0.68025				1
					125.455	0.94982		338	0.00513		125.455	0.61088				0.3
					119.394	0.92416		337	0.00522		119.394	0.54144				0.4
					113.333	0.89399		336	0.00535		113.333	0.47377				0.4
					107.273	0.85981		335	0.00548		107.273	0.4093
					101.212	0.8222		334	0.00561		101.212	0.34918
					95.1515	0.78171		333	0.00575		95.1515	0.29426
					89.0909	0.73902		332	0.00592		89.0909	0.24507
					83.0303	0.69463		331	0.00606		83.0303	0.20176
					76.9697	0.64927		330	0.00623		76.9697	0.16433
					70.9091	0.60345		329	0.00645		70.9091	0.13252
					64.8485	0.55778		328	0.00663		64.8485	0.10598
					58.7879	0.51267		327	0.00685		58.7879	0.08414
					52.7273	0.4687		326	0.00707		52.7273	0.06651
					46.6667	0.42621		325	0.00729		46.6667	0.0525
					40.6061	0.38552		324	0.00751		40.6061	0.04147
					34.5455	0.34698		323	0.00778		34.5455	0.033
					28.4849	0.3107		322	0.00804		28.4849	0.02657
					22.4242	0.27689		321	0.00835		22.4242	0.02174
					16.3636	0.24564		320	0.00866		16.3636	0.0182
					10.303	0.21701		319	0.00897		10.303	0.01562
					4.24242	0.19094		318	0.00933		4.24242	0.01378
					-1.81818	0.16739		317	0.00968		-1.81818	0.01249
					-7.87879	0.1463		316	0.01008		-7.87879	0.01157
					-13.9394	0.12751		315	0.01048		-13.9394	0.01096
					-20	0.11094		314	0.01087		-20	0.01055
					-26.0606	0.09642		313	0.01131		-26.0606	0.01027
					-32.1212	0.0838		312	0.0118		-32.1212	0.01007
					-38.1818	0.07287		311	0.01229		-38.1818	0.00997
					-44.2424	0.06347		310	0.01282		-44.2424	0.00987
					-50.303	0.05552		309	0.01335		-50.303	0.00983
					-56.3636	0.04875		308	0.01392		-56.3636	0.0098
					-62.4242	0.04305		307	0.0145		-62.4242	0.0098
					-68.4848	0.03833		306	0.01516		-68.4848	0.00976
					-74.5455	0.03438		305	0.01582		-74.5455	0.00976
					-80.6061	0.03115		304	0.01653		-80.6061	0.00976
					-86.6667	0.02848		303	0.01724		-86.6667	0.00976
					-92.7273	0.02632		302	0.01799		-92.7273	0.00976
					-98.7879	0.02458		301	0.01883		-98.7879	0.00976
					-104.848	0.02314		300	0.01967		-104.848	0.00976
					-110.909	0.02206		299	0.02055		-110.909	0.00976
					-116.97	0.02114		298	0.02144		-116.97	0.00976
					-123.03	0.02047		297	0.02241		-123.03	0.00976
					-129.091	0.01991		296	0.02343		-129.091	0.00976
					-135.152	0.0195		295	0.02449		-135.152	0.00976
					-141.212	0.01919		294	0.02559		-141.212	0.00976
					-147.273	0.01893		293	0.02674		-147.273	0.00976
					-153.333	0.01873		292	0.02798		-153.333	0.00976
					-159.394	0.01858		291	0.02922		-159.394	0.00976
					-165.455	0.01847		290	0.03054		-165.455	0.00976
					-171.515	0.01837		289	0.03191		-171.515	0.00976
					-177.576	0.01832		288	0.03333		-177.576	0.00976
					-183.636	0.01827		287	0.03483		-183.636	0.00976
					-189.697	0.01827		286	0.03638		-189.697	0.00976
					-195.758	0.01822		285	0.03801		-195.758	0.00976
					-201.818	0.01822		284	0.03969		-201.818	0.00976
					-207.879	0.01822		283	0.04146		-207.879	0.00976
					-213.939	0.01822		282	0.04327		-213.939	0.00976
					-220	0.01817		281	0.04517		-220	0.00976
								280	0.04712
								279	0.04919
								278	0.05131
								277	0.05352
								276	0.05582
								275	0.05817
								274	0.06064
								273	0.0632
								272	0.06586
								271	0.0686
								270	0.07143
								269	0.07434
								268	0.07739
								267	0.08053
								266	0.08376
								265	0.08712
								264	0.09056
								263	0.09414
								262	0.09781
								261	0.10161
								260	0.1055
								259	0.10952
								258	0.11368
								257	0.11797
								256	0.12234
								255	0.12685
								254	0.13149
								253	0.13627
								252	0.14117
								251	0.14621
								250	0.15138
								249	0.15669
								248	0.16212
								247	0.16769
								246	0.17339
								245	0.17923
								244	0.18524
								243	0.19134
								242	0.19761
								241	0.20398
								240	0.21052
								239	0.21719
								238	0.224
								237	0.23098
								236	0.23806
								235	0.2453
								234	0.25264
								233	0.26015
								232	0.2678
								231	0.27558
								230	0.28345
								229	0.29149
								228	0.29967
								227	0.30798
								226	0.31638
								225	0.32491
								224	0.33357
								223	0.34236
								222	0.35125
								221	0.36027
								220	0.36941
								219	0.37865
								218	0.38798
								217	0.39744
								216	0.40694
								215	0.41657
								214	0.4263
								213	0.43611
								212	0.44597
								211	0.45596
								210	0.46599
								209	0.47607
								208	0.48623
								207	0.49644
								206	0.5067
								205	0.51704
								204	0.52738
								203	0.53777
								202	0.5482
								201	0.55863
								200	0.5691
								199	0.57954
								198	0.59001
								197	0.60049
								196	0.61096
								195	0.62144
								194	0.63187
								193	0.64225
								192	0.65264
								191	0.66298
								190	0.67328
								189	0.68349
								188	0.6937
								187	0.70378
								186	0.71381
								185	0.7238
								184	0.73366
								183	0.74343
								182	0.7531
								181	0.7627
								180	0.77215
								179	0.78148
								178	0.79072
								177	0.79978
								176	0.80875
								175	0.81755
								174	0.82617
								173	0.8347
								172	0.84301
								171	0.85118
								170	0.85918
								169	0.86696
								168	0.87461
								167	0.88203
								166	0.88928
								165	0.89635
								164	0.9032
								163	0.90983
								162	0.91624
								161	0.92248
								160	0.92844
								159	0.93423
								158	0.93976
								157	0.94506
								156	0.95014
								155	0.95496
								154	0.9596
								153	0.96393
								152	0.96804
								151	0.97193
								150	0.97556
								149	0.97892
								148	0.98206
								147	0.98493
								146	0.98758
								145	0.98992
								144	0.99204
								143	0.99394
								142	0.99554
								141	0.99691
								140	0.99806
								139	0.9989
								138	0.99951
								137	0.99987
								136	1
								135	0.99987
								134	0.99951
								133	0.9989
								132	0.99806
								131	0.99695
								130	0.99562
								129	0.99408
								128	0.99231
								127	0.99028
								126	0.98807
								125	0.98559
								124	0.98294
								123	0.98007
								122	0.97697
								121	0.97366
								120	0.97017
								119	0.9665
								118	0.96261
								117	0.95854
								116	0.95425
								115	0.94983
								114	0.94524
								113	0.94046
								112	0.93551
								111	0.93043
								110	0.92517
								109	0.91973
								108	0.91421
								107	0.90851
								106	0.90267
								105	0.89671
								104	0.89061
								103	0.88442
								102	0.8781
								101	0.87165
								100	0.8651
								99	0.85848
								98	0.85176
								97	0.84491
								96	0.83801
								95	0.83103
								94	0.82396
								93	0.8168
								92	0.80959
								91	0.80234
								90	0.79501
								89	0.78762
								88	0.7802
								87	0.77273
								86	0.76522
								85	0.75766
								84	0.7501
								83	0.7425
								82	0.73485
								81	0.72725
								80	0.71956
								79	0.71191
								78	0.70422
								77	0.69653
								76	0.68888
								75	0.68119
								74	0.6735
								73	0.66586
								72	0.65821
								71	0.65056
								70	0.64296
								69	0.63536
								68	0.6278
								67	0.62024
								66	0.61273
								65	0.60526
								64	0.59779
								63	0.59041
								62	0.58303
								61	0.57569
								60	0.5684
								59	0.56115
								58	0.55394
								57	0.54683
								56	0.53971
								55	0.53264
								54	0.52566
								53	0.51872
								52	0.51182
								51	0.50502
								50	0.49821
								49	0.49149
								48	0.48486
								47	0.47823
								46	0.47173
								45	0.46524
								44	0.45883
								43	0.45251
								42	0.44619
								41	0.44
								40	0.43381
								39	0.42776
								38	0.4217
								37	0.41578
								36	0.40986
								35	0.40402
								34	0.39828
								33	0.39257
								32	0.38696
								31	0.38139
								30	0.37591
								29	0.37048
								28	0.36513
								27	0.35982
								26	0.35461
								25	0.34944
								24	0.34435
								23	0.33931
								22	0.33432
								21	0.32946
								20	0.3246
								19	0.31982
								18	0.31509
								17	0.31045
								16	0.30586
								15	0.30135
								14	0.29688
								13	0.29246
								12	0.28813
								11	0.28385
								10	0.27965
								9	0.27549
								8	0.27138
								7	0.26731
								6	0.26334
								5	0.2594
								4	0.25551
								3	0.25171
								2	0.24791
								1	0.2442
								0	0.24057
								-1	0.23695
								-2	0.23341
								-3	0.22988
								-4	0.22643
								-5	0.22303
								-6	0.21971
								-7	0.2164
								-8	0.21313
								-9	0.20994
								-10	0.20681
								-11	0.20367
								-12	0.20062
								-13	0.19761
								-14	0.19461
								-15	0.19169
								-16	0.18882
								-17	0.18599
								-18	0.18316
								-19	0.18042
								-20	0.17772
								-21	0.17503
								-22	0.17238
								-23	0.16981
								-24	0.16725
								-25	0.16473
								-26	0.16225
								-27	0.15982
								-28	0.15739
								-29	0.15505
								-30	0.15271
								-31	0.15041
								-32	0.14815
								-33	0.14594
								-34	0.14373
								-35	0.14157
								-36	0.13945
								-37	0.13737
								-38	0.13529
								-39	0.1333
								-40	0.13127
								-41	0.12933
								-42	0.12738
								-43	0.12548
								-44	0.12358
								-45	0.12177
								-46	0.11991
								-47	0.11814
								-48	0.11638
								-49	0.11465
								-50	0.11293
								-51	0.11125
								-52	0.10957
								-53	0.10793
								-54	0.10634
								-55	0.10475
								-56	0.1032
								-57	0.10166
								-58	0.10015
								-59	0.09865
								-60	0.09719
								-61	0.09573
								-62	0.09432
								-63	0.09291
								-64	0.09154
								-65	0.09017
								-66	0.08884
								-67	0.08751
								-68	0.08623
								-69	0.08495
								-70	0.08371
								-71	0.08248
								-72	0.08124
								-73	0.08004
								-74	0.0789
								-75	0.0777
								-76	0.07655
								-77	0.07545
								-78	0.07434
								-79	0.07324
								-80	0.07218
								-81	0.07112
								-82	0.07006
								-83	0.06904
								-84	0.06802
								-85	0.06705
								-86	0.06608
								-87	0.0651
								-88	0.06413
								-89	0.0632
								-90	0.06228
								-91	0.06139
								-92	0.06051
								-93	0.05962
								-94	0.05874
								-95	0.0579
								-96	0.05706
								-97	0.05622
								-98	0.05543
								-99	0.05463
								-100	0.05383
								-101	0.05304
								-102	0.05229
								-103	0.05154
								-104	0.05078
								-105	0.05008
								-106	0.04937
								-107	0.04866
								-108	0.04796
								-109	0.04725
								-110	0.04659
								-111	0.04592
								-112	0.04526
								-113	0.04464
								-114	0.04398
								-115	0.04336
								-116	0.04274
								-117	0.04217
								-118	0.04155
								-119	0.04097
								-120	0.0404
								-121	0.03982
								-122	0.03925
								-123	0.03872
								-124	0.03819
								-125	0.03761
								-126	0.03713
								-127	0.0366
								-128	0.03607
								-129	0.03558
								-130	0.03509
								-131	0.03461
								-132	0.03412
								-133	0.03364
								-134	0.03319
								-135	0.03271
								-136	0.03227
								-137	0.03182
								-138	0.03138
								-139	0.03094
								-140	0.03054
								-141	0.0301
								-142	0.0297
								-143	0.0293
								-144	0.02891
								-145	0.02851
								-146	0.02811
								-147	0.02776
								-148	0.02736
								-149	0.02701
								-150	0.02665
								-151	0.0263
								-152	0.02594
								-153	0.02559
								-154	0.02524
								-155	0.02493
								-156	0.02457
								-157	0.02427
								-158	0.02396
								-159	0.0236
								-160	0.02329
								-161	0.02298
								-162	0.02272
								-163	0.02241
								-164	0.0221
								-165	0.02183
								-166	0.02152
								-167	0.02126
								-168	0.02099
								-169	0.02073
								-170	0.02046
								-171	0.0202
								-172	0.01993
								-173	0.01967
								-174	0.01945
								-175	0.01918
								-176	0.01896
								-177	0.0187
								-178	0.01848
								-179	0.01825
								-180	0.01803
								-181	0.01781
								-182	0.01759
								-183	0.01737
								-184	0.01715
								-185	0.01693
								-186	0.01671
								-187	0.01653
								-188	0.01631
								-189	0.01613
								-190	0.01591
								-191	0.01573
								-192	0.01556
								-193	0.01534
								-194	0.01516
								-195	0.01498
								-196	0.01481
								-197	0.01463
								-198	0.01445
								-199	0.01432
								-200	0.01414
								-201	0.01397
								-202	0.01379
								-203	0.01366
								-204	0.01348
								-205	0.01335
								-206	0.01317
								-207	0.01304
								-208	0.01291
								-209	0.01273
								-210	0.0126
								-211	0.01246
								-212	0.01233
								-213	0.0122
								-214	0.01207
								-215	0.01193
								-216	0.0118
								-217	0.01167
								-218	0.01154
								-219	0.0114
								-220	0.01127

## Sheet: Figure.2C
	GFP-MCAK		EB1-GFP		XMAP215-GFP					half-Gaussian fit to the growing microtubule end
position (nm)	normalized intensity of microtubule end (A.U.)	STD	normalized intensity of microtubule end (A.U.)	STD	normalized intensity of microtubule end (A.U.)	STD			position (nm)	GFP-MCAK	EB1-GFP	XMAP215-GFP
-400	0.93918	0.15071	0.95441	0.11885	0.91982	0.13411			-400	0.99445	0.99322	0.9943
-320	0.9537	0.13332	0.97165	0.11022	0.97496	0.12913			-397.333	0.99445	0.99322	0.9943
-240	1.01362	0.12813	1.00941	0.10997	0.9904	0.1313			-394.667	0.99445	0.99322	0.9943
-160	1.04804	0.16994	1.01672	0.12075	1.05523	0.12621			-392	0.99445	0.99322	0.9943
-80	1.05735	0.17817	1.02919	0.13496	1.02385	0.16398			-389.333	0.99445	0.99322	0.9943
0	1.05039	0.10702	1.00439	0.10068	1.05429	0.10578			-386.667	0.99445	0.99322	0.9943
80	0.7675	0.08854	0.77659	0.0865	0.76876	0.08536			-384	0.99445	0.99322	0.9943
160	0.46179	0.08534	0.48755	0.07938	0.48347	0.10044			-381.333	0.99445	0.99322	0.9943
240	0.23877	0.09772	0.26581	0.08667	0.26992	0.1024			-378.667	0.99445	0.99322	0.9943
320	0.08383	0.08968	0.13004	0.08049	0.13634	0.12139			-376	0.99445	0.99322	0.9943
400	0.02873	0.08176	0.06829	0.07568	0.08661	0.10336			-373.333	0.99445	0.99322	0.9943
480	0.00231	0.07614	0.0469	0.07061	0.05738	0.08686			-370.667	0.99445	0.99322	0.9943
560	-0.00923	0.07192	0.03354	0.07279	0.04351	0.08405			-368	0.99445	0.99322	0.9943
640	-0.0114	0.07569	0.02156	0.06373	0.03763	0.06951			-365.333	0.99445	0.99322	0.9943
720	-0.01189	0.08495	0.01818	0.06356	0.02082	0.07554			-362.667	0.99445	0.99322	0.9943
									-360	0.99445	0.99322	0.9943
									-357.333	0.99445	0.99322	0.9943
									-354.667	0.99445	0.99322	0.9943
									-352	0.99445	0.99322	0.9943
									-349.333	0.99445	0.99322	0.9943
									-346.667	0.99445	0.99322	0.9943
									-344	0.99445	0.99322	0.9943
									-341.333	0.99445	0.99322	0.9943
									-338.667	0.99445	0.99322	0.9943
									-336	0.99445	0.99322	0.9943
									-333.333	0.99445	0.99322	0.9943
									-330.667	0.99445	0.99322	0.9943
									-328	0.99445	0.99322	0.9943
									-325.333	0.99445	0.99322	0.9943
									-322.667	0.99445	0.99322	0.9943
									-320	0.99445	0.99322	0.9943
									-317.333	0.99445	0.99322	0.9943
									-314.667	0.99445	0.99322	0.9943
									-312	0.99445	0.99322	0.9943
									-309.333	0.99445	0.99322	0.9943
									-306.667	0.99445	0.99322	0.9943
									-304	0.99445	0.99322	0.9943
									-301.333	0.99445	0.99322	0.9943
									-298.667	0.99445	0.99322	0.9943
									-296	0.99445	0.99322	0.9943
									-293.333	0.99445	0.99322	0.9943
									-290.667	0.99445	0.99322	0.9943
									-288	0.99445	0.99322	0.9943
									-285.333	0.99445	0.99322	0.9943
									-282.667	0.99445	0.99322	0.9943
									-280	0.99445	0.99322	0.9943
									-277.333	0.99445	0.99322	0.9943
									-274.667	0.99445	0.99322	0.9943
									-272	0.99445	0.99322	0.9943
									-269.333	0.99445	0.99322	0.9943
									-266.667	0.99445	0.99322	0.9943
									-264	0.99445	0.99322	0.9943
									-261.333	0.99445	0.99322	0.9943
									-258.667	0.99445	0.99322	0.9943
									-256	0.99445	0.99322	0.9943
									-253.333	0.99445	0.99322	0.9943
									-250.667	0.99445	0.99322	0.9943
									-248	0.99445	0.99322	0.9943
									-245.333	0.99445	0.99322	0.9943
									-242.667	0.99445	0.99322	0.9943
									-240	0.99445	0.99322	0.9943
									-237.333	0.99445	0.99322	0.9943
									-234.667	0.99445	0.99322	0.9943
									-232	0.99445	0.99322	0.9943
									-229.333	0.99445	0.99322	0.9943
									-226.667	0.99445	0.99322	0.9943
									-224	0.99445	0.99322	0.9943
									-221.333	0.99445	0.99322	0.9943
									-218.667	0.99445	0.99322	0.9943
									-216	0.99445	0.99322	0.9943
									-213.333	0.99445	0.99322	0.9943
									-210.667	0.99445	0.99322	0.9943
									-208	0.99445	0.99322	0.9943
									-205.333	0.99445	0.99322	0.9943
									-202.667	0.99445	0.99322	0.9943
									-200	0.99445	0.99322	0.9943
									-197.333	0.99445	0.99322	0.9943
									-194.667	0.99445	0.99322	0.9943
									-192	0.99445	0.99322	0.9943
									-189.333	0.99445	0.99322	0.9943
									-186.667	0.99445	0.99322	0.9943
									-184	0.99445	0.99322	0.9943
									-181.333	0.99445	0.99322	0.9943
									-178.667	0.99445	0.99322	0.9943
									-176	0.99445	0.99322	0.9943
									-173.333	0.99445	0.99322	0.9943
									-170.667	0.99445	0.99322	0.9943
									-168	0.99445	0.99322	0.9943
									-165.333	0.99445	0.99322	0.9943
									-162.667	0.99445	0.99322	0.9943
									-160	0.99445	0.99322	0.9943
									-157.333	0.99445	0.99322	0.9943
									-154.667	0.99445	0.99322	0.9943
									-152	0.99445	0.99322	0.9943
									-149.333	0.99445	0.99322	0.9943
									-146.667	0.99445	0.99322	0.9943
									-144	0.99445	0.99322	0.9943
									-141.333	0.99445	0.99322	0.9943
									-138.667	0.99445	0.99322	0.9943
									-136	0.99445	0.99322	0.9943
									-133.333	0.99445	0.99322	0.9943
									-130.667	0.99445	0.99322	0.9943
									-128	0.99445	0.99322	0.9943
									-125.333	0.99445	0.99322	0.9943
									-122.667	0.99445	0.99322	0.9943
									-120	0.99445	0.99322	0.9943
									-117.333	0.99445	0.99322	0.9943
									-114.667	0.99445	0.99322	0.9943
									-112	0.99445	0.99322	0.9943
									-109.333	0.99445	0.99322	0.9943
									-106.667	0.99445	0.99322	0.9943
									-104	0.99445	0.99322	0.9943
									-101.333	0.99445	0.99322	0.9943
									-98.6667	0.99445	0.99322	0.9943
									-96	0.99445	0.99322	0.9943
									-93.3333	0.99445	0.99322	0.9943
									-90.6667	0.99445	0.99322	0.9943
									-88	0.99445	0.99322	0.9943
									-85.3333	0.99445	0.99322	0.9943
									-82.6667	0.99445	0.99322	0.9943
									-80	0.99445	0.99322	0.9943
									-77.3333	0.99445	0.99322	0.9943
									-74.6667	0.99445	0.99322	0.9943
									-72	0.99445	0.99322	0.9943
									-69.3333	0.99445	0.99322	0.9943
									-66.6667	0.99445	0.99322	0.9943
									-64	0.99445	0.99322	0.9943
									-61.3333	0.99445	0.99322	0.9943
									-58.6667	0.99445	0.99322	0.9943
									-56	0.99445	0.99322	0.9943
									-53.3333	0.99445	0.99322	0.9943
									-50.6667	0.99445	0.99322	0.9943
									-48	0.99445	0.99322	0.9943
									-45.3333	0.99445	0.99322	0.9943
									-42.6667	0.99445	0.99322	0.9943
									-40	0.99445	0.99322	0.9943
									-37.3333	0.99445	0.99322	0.9943
									-34.6667	0.99445	0.99322	0.9943
									-32	0.99445	0.99322	0.9943
									-29.3333	0.99445	0.99322	0.9943
									-26.6667	0.99445	0.99322	0.9943
									-24	0.99445	0.99322	0.9943
									-21.3333	0.99445	0.99322	0.9943
									-18.6667	0.99445	0.99322	0.9943
									-16	0.99445	0.99322	0.9943
									-13.3333	0.99445	0.99322	0.9943
									-10.6667	0.99445	0.99322	0.9943
									-8	0.99445	0.99322	0.9943
									-5.33333	0.99445	0.99322	0.9943
									-2.66667	0.99445	0.99322	0.9943
									0	0.99445	0.99322	0.9943
									2.66667	0.99425	0.99305	0.99411
									5.33333	0.99366	0.99252	0.99354
									8	0.99267	0.99164	0.99259
									10.6667	0.99129	0.99041	0.99127
									13.3333	0.98952	0.98883	0.98956
									16	0.98736	0.9869	0.98749
									18.6667	0.98482	0.98463	0.98504
									21.3333	0.98189	0.98202	0.98223
									24	0.97858	0.97906	0.97905
									26.6667	0.97489	0.97577	0.9755
									29.3333	0.97084	0.97215	0.9716
									32	0.96641	0.9682	0.96735
									34.6667	0.96162	0.96392	0.96275
									37.3333	0.95648	0.95932	0.95781
									40	0.95099	0.95441	0.95253
									42.6667	0.94515	0.94918	0.94692
									45.3333	0.93898	0.94365	0.94099
									48	0.93247	0.93783	0.93474
									50.6667	0.92564	0.93171	0.92819
									53.3333	0.9185	0.9253	0.92133
									56	0.91105	0.91862	0.91417
									58.6667	0.90331	0.91166	0.90673
									61.3333	0.89527	0.90444	0.89901
									64	0.88695	0.89696	0.89102
									66.6667	0.87836	0.88923	0.88278
									69.3333	0.86951	0.88126	0.87428
									72	0.8604	0.87305	0.86554
									74.6667	0.85105	0.86462	0.85657
									77.3333	0.84147	0.85597	0.84737
									80	0.83167	0.84712	0.83796
									82.6667	0.82165	0.83806	0.82835
									85.3333	0.81143	0.82881	0.81855
									88	0.80103	0.81938	0.80857
									90.6667	0.79044	0.80978	0.79841
									93.3333	0.77968	0.80001	0.78809
									96	0.76876	0.79009	0.77762
									98.6667	0.75769	0.78002	0.76701
									101.333	0.74649	0.76981	0.75627
									104	0.73515	0.75948	0.74541
									106.667	0.72371	0.74903	0.73444
									109.333	0.71216	0.73847	0.72337
									112	0.70051	0.72782	0.71222
									114.667	0.68878	0.71707	0.70098
									117.333	0.67698	0.70624	0.68968
									120	0.66512	0.69534	0.67832
									122.667	0.6532	0.68438	0.66691
									125.333	0.64124	0.67336	0.65547
									128	0.62925	0.66231	0.64399
									130.667	0.61724	0.65121	0.6325
									133.333	0.60522	0.64009	0.621
									136	0.5932	0.62895	0.6095
									138.667	0.58118	0.6178	0.59801
									141.333	0.56918	0.60664	0.58654
									144	0.55721	0.5955	0.5751
									146.667	0.54527	0.58437	0.56369
									149.333	0.53338	0.57326	0.55232
									152	0.52154	0.56218	0.54101
									154.667	0.50975	0.55113	0.52976
									157.333	0.49804	0.54014	0.51857
									160	0.4864	0.52919	0.50746
									162.667	0.47485	0.5183	0.49643
									165.333	0.46338	0.50748	0.48549
									168	0.45201	0.49673	0.47465
									170.667	0.44075	0.48605	0.46391
									173.333	0.42959	0.47546	0.45327
									176	0.41855	0.46496	0.44275
									178.667	0.40763	0.45455	0.43234
									181.333	0.39684	0.44425	0.42206
									184	0.38618	0.43405	0.41191
									186.667	0.37565	0.42396	0.40188
									189.333	0.36527	0.41398	0.392
									192	0.35503	0.40412	0.38226
									194.667	0.34495	0.39438	0.37266
									197.333	0.33501	0.38477	0.36321
									200	0.32523	0.37529	0.35391
									202.667	0.31561	0.36595	0.34477
									205.333	0.30616	0.35674	0.33578
									208	0.29687	0.34767	0.32696
									210.667	0.28774	0.33874	0.31829
									213.333	0.27879	0.32996	0.30979
									216	0.27	0.32132	0.30145
									218.667	0.26139	0.31284	0.29328
									221.333	0.25295	0.3045	0.28527
									224	0.24468	0.29631	0.27744
									226.667	0.2366	0.28828	0.26977
									229.333	0.22868	0.28041	0.26227
									232	0.22095	0.27268	0.25494
									234.667	0.21338	0.26512	0.24778
									237.333	0.206	0.25771	0.24079
									240	0.19879	0.25046	0.23397
									242.667	0.19176	0.24336	0.22731
									245.333	0.1849	0.23643	0.22083
									248	0.17821	0.22964	0.21451
									250.667	0.1717	0.22302	0.20835
									253.333	0.16536	0.21655	0.20236
									256	0.15919	0.21024	0.19654
									258.667	0.15319	0.20408	0.19087
									261.333	0.14735	0.19808	0.18536
									264	0.14168	0.19223	0.18002
									266.667	0.13617	0.18653	0.17482
									269.333	0.13083	0.18098	0.16979
									272	0.12564	0.17558	0.1649
									274.667	0.12061	0.17032	0.16016
									277.333	0.11573	0.16521	0.15557
									280	0.11101	0.16025	0.15113
									282.667	0.10644	0.15543	0.14682
									285.333	0.10201	0.15074	0.14266
									288	0.09773	0.1462	0.13864
									290.667	0.09358	0.14179	0.13475
									293.333	0.08958	0.13751	0.13099
									296	0.08571	0.13337	0.12736
									298.667	0.08198	0.12936	0.12386
									301.333	0.07838	0.12547	0.12048
									304	0.0749	0.12171	0.11722
									306.667	0.07155	0.11807	0.11408
									309.333	0.06832	0.11455	0.11105
									312	0.06521	0.11114	0.10814
									314.667	0.06222	0.10785	0.10534
									317.333	0.05933	0.10468	0.10264
									320	0.05656	0.10161	0.10005
									322.667	0.0539	0.09866	0.09756
									325.333	0.05133	0.0958	0.09517
									328	0.04887	0.09305	0.09287
									330.667	0.04651	0.0904	0.09067
									333.333	0.04424	0.08785	0.08855
									336	0.04207	0.08539	0.08653
									338.667	0.03998	0.08303	0.08458
									341.333	0.03798	0.08075	0.08272
									344	0.03607	0.07856	0.08094
									346.667	0.03424	0.07646	0.07924
									349.333	0.03248	0.07444	0.0776
									352	0.03081	0.07249	0.07604
									354.667	0.0292	0.07063	0.07455
									357.333	0.02767	0.06884	0.07313
									360	0.0262	0.06713	0.07177
									362.667	0.0248	0.06548	0.07047
									365.333	0.02347	0.06391	0.06924
									368	0.0222	0.0624	0.06806
									370.667	0.02098	0.06095	0.06693
									373.333	0.01982	0.05957	0.06586
									376	0.01872	0.05825	0.06484
									378.667	0.01767	0.05698	0.06387
									381.333	0.01667	0.05577	0.06295
									384	0.01572	0.05461	0.06207
									386.667	0.01482	0.05351	0.06123
									389.333	0.01396	0.05245	0.06044
									392	0.01314	0.05145	0.05969
									394.667	0.01236	0.05049	0.05897
									397.333	0.01163	0.04957	0.05829
									400	0.01093	0.0487	0.05765
									402.667	0.01026	0.04787	0.05704
									405.333	0.00964	0.04708	0.05646
									408	0.00904	0.04632	0.05592
									410.667	0.00848	0.04561	0.0554
									413.333	0.00794	0.04492	0.05491
									416	0.00744	0.04427	0.05445
									418.667	0.00696	0.04366	0.05401
									421.333	0.00651	0.04307	0.05359
									424	0.00608	0.04252	0.0532
									426.667	0.00567	0.04199	0.05283
									429.333	0.00529	0.04149	0.05248
									432	0.00493	0.04101	0.05215
									434.667	0.00459	0.04056	0.05184
									437.333	0.00427	0.04013	0.05155
									440	0.00397	0.03973	0.05128
									442.667	0.00369	0.03935	0.05102
									445.333	0.00342	0.03898	0.05077
									448	0.00317	0.03864	0.05054
									450.667	0.00293	0.03831	0.05033
									453.333	0.00271	0.03801	0.05013
									456	0.0025	0.03772	0.04993
									458.667	0.0023	0.03744	0.04976
									461.333	0.00211	0.03718	0.04959
									464	0.00194	0.03694	0.04943
									466.667	0.00177	0.03671	0.04928
									469.333	0.00162	0.03649	0.04914
									472	0.00148	0.03629	0.04901
									474.667	0.00134	0.03609	0.04889
									477.333	0.00122	0.03591	0.04878
									480	0.0011	0.03574	0.04867
									482.667	0.000987339	0.03558	0.04857
									485.333	0.000883685	0.03543	0.04848
									488	0.000786725	0.03529	0.04839
									490.667	0.000696066	0.03515	0.04831
									493.333	0.000611334	0.03502	0.04823
									496	0.000532175	0.03491	0.04816
									498.667	0.000458254	0.0348	0.04809
									501.333	0.000389255	0.03469	0.04803
									504	0.000324876	0.03459	0.04797
									506.667	0.000264835	0.0345	0.04792
									509.333	0.000208862	0.03441	0.04787
									512	0.000156703	0.03433	0.04782
									514.667	0.000108121	0.03426	0.04778
									517.333	6.29e-05	0.03419	0.04774
									520	2.08e-05	0.03412	0.0477
									522.667	-1.84e-05	0.03406	0.04767
									525.333	-5.48e-05	0.034	0.04763
									528	-8.86e-05	0.03395	0.0476
									530.667	-0.000120076	0.0339	0.04758
									533.333	-0.000149279	0.03385	0.04755
									536	-0.000176389	0.0338	0.04753
									538.667	-0.000201545	0.03376	0.0475
									541.333	-0.000224877	0.03372	0.04748
									544	-0.000246509	0.03369	0.04746
									546.667	-0.000266556	0.03365	0.04745
									549.333	-0.000285126	0.03362	0.04743
									552	-0.000302321	0.03359	0.04741
									554.667	-0.000318237	0.03357	0.0474
									557.333	-0.000332962	0.03354	0.04739
									560	-0.000346579	0.03352	0.04738
									562.667	-0.000359167	0.0335	0.04736
									565.333	-0.000370798	0.03348	0.04735
									568	-0.000381541	0.03346	0.04734
									570.667	-0.000391459	0.03344	0.04734
									573.333	-0.000400612	0.03342	0.04733
									576	-0.000409056	0.03341	0.04732
									578.667	-0.000416842	0.03339	0.04731
									581.333	-0.000424017	0.03338	0.04731
									584	-0.000430629	0.03337	0.0473
									586.667	-0.000436717	0.03336	0.0473
									589.333	-0.000442322	0.03335	0.04729
									592	-0.000447479	0.03334	0.04729
									594.667	-0.000452222	0.03333	0.04728
									597.333	-0.000456584	0.03332	0.04728
									600	-0.000460591	0.03331	0.04728
									602.667	-0.000464273	0.03331	0.04727
									605.333	-0.000467654	0.0333	0.04727
									608	-0.000470757	0.03329	0.04727
									610.667	-0.000473604	0.03329	0.04726
									613.333	-0.000476214	0.03328	0.04726
									616	-0.000478608	0.03328	0.04726
									618.667	-0.000480801	0.03327	0.04726
									621.333	-0.00048281	0.03327	0.04726
									624	-0.000484649	0.03327	0.04725
									626.667	-0.000486332	0.03326	0.04725
									629.333	-0.000487872	0.03326	0.04725
									632	-0.00048928	0.03326	0.04725
									634.667	-0.000490567	0.03325	0.04725
									637.333	-0.000491743	0.03325	0.04725
									640	-0.000492817	0.03325	0.04725
									642.667	-0.000493797	0.03325	0.04725
									645.333	-0.000494692	0.03324	0.04725
									648	-0.000495508	0.03324	0.04725
									650.667	-0.000496252	0.03324	0.04724
									653.333	-0.000496931	0.03324	0.04724
									656	-0.000497548	0.03324	0.04724
									658.667	-0.000498111	0.03324	0.04724
									661.333	-0.000498623	0.03324	0.04724
									664	-0.000499089	0.03324	0.04724
									666.667	-0.000499513	0.03323	0.04724
									669.333	-0.000499898	0.03323	0.04724
									672	-0.000500248	0.03323	0.04724
									674.667	-0.000500567	0.03323	0.04724
									677.333	-0.000500855	0.03323	0.04724
									680	-0.000501118	0.03323	0.04724
									682.667	-0.000501355	0.03323	0.04724
									685.333	-0.000501571	0.03323	0.04724
									688	-0.000501767	0.03323	0.04724
									690.667	-0.000501944	0.03323	0.04724
									693.333	-0.000502104	0.03323	0.04724
									696	-0.00050225	0.03323	0.04724
									698.667	-0.000502381	0.03323	0.04724
									701.333	-0.0005025	0.03323	0.04724
									704	-0.000502608	0.03323	0.04724
									706.667	-0.000502705	0.03323	0.04724
									709.333	-0.000502793	0.03323	0.04724
									712	-0.000502872	0.03323	0.04724
									714.667	-0.000502944	0.03323	0.04724
									717.333	-0.000503009	0.03323	0.04724
									720	-0.000503067	0.03323	0.04724

## Sheet: Figure.2D
	normalized intensity (A.U.)						fit
position (nm)	MCAK-RFP	XMAP215-GFP	a growing microtubule end			position (nm)	Gaussian fit to MCAK-RFP	Gaussian fit to XMAP215-GFP	half-Gaussian fit to the growing microtubule end
-400	-0.02382	-0.23326	1.04836			-400	0.000167243	0.00572	1
-320	-0.01503	0.19677	0.85325			-397.333	0.000182748	0.00601	1
-240	-0.26109	0.08848	1.23413			-394.667	0.0001996	0.00632	1
-160	-0.15271	0.19206	1.26783			-392	0.000217907	0.00663	1
-80	0.37165	0.41336	0.94471			-389.333	0.000237785	0.00696	1
0	0.60893	0.44161	1.01749			-386.667	0.000259358	0.00731	1
80	0.98095	1.10235	0.63831			-384	0.00028276	0.00767	1
160	0.98095	1.10235	0.37948			-381.333	0.000308134	0.00804	1
240	0.50347	0.70684	0.18295			-378.667	0.000335632	0.00843	1
320	0.31306	0.56873	0.13368			-376	0.000365417	0.00884	1
400	0.39215	0.56716	-0.35821			-373.333	0.000397666	0.00927	1
480	-0.04139	0.15753	-0.05379			-370.667	0.000432564	0.00972	1
560	-0.04432	0.04924	-0.05379			-368	0.000470311	0.01018	1
640	-0.16442	0.07278	-0.36699			-365.333	0.000511119	0.01066	1
720	-0.10584	-0.00726	0.34465			-362.667	0.000555216	0.01117	1
						-360	0.000602843	0.01169	1
						-357.333	0.000654259	0.01224	1
						-354.667	0.000709738	0.01281	1
						-352	0.000769571	0.0134	1
						-349.333	0.000834069	0.01402	1
						-346.667	0.000903563	0.01466	1
						-344	0.000978402	0.01533	1
						-341.333	0.00106	0.01602	1
						-338.667	0.00115	0.01675	1
						-336	0.00124	0.0175	1
						-333.333	0.00134	0.01828	1
						-330.667	0.00145	0.01909	1
						-328	0.00156	0.01993	1
						-325.333	0.00169	0.0208	1
						-322.667	0.00182	0.02171	1
						-320	0.00196	0.02265	1
						-317.333	0.00211	0.02362	1
						-314.667	0.00228	0.02464	1
						-312	0.00245	0.02568	1
						-309.333	0.00264	0.02677	1
						-306.667	0.00284	0.0279	1
						-304	0.00306	0.02907	1
						-301.333	0.00329	0.03028	1
						-298.667	0.00353	0.03153	1
						-296	0.00379	0.03283	1
						-293.333	0.00407	0.03417	1
						-290.667	0.00437	0.03556	1
						-288	0.00468	0.03699	1
						-285.333	0.00502	0.03848	1
						-282.667	0.00538	0.04001	1
						-280	0.00576	0.0416	1
						-277.333	0.00617	0.04324	1
						-274.667	0.0066	0.04493	1
						-272	0.00706	0.04668	1
						-269.333	0.00755	0.04848	1
						-266.667	0.00807	0.05034	1
						-264	0.00862	0.05226	1
						-261.333	0.0092	0.05425	1
						-258.667	0.00982	0.05629	1
						-256	0.01048	0.0584	1
						-253.333	0.01117	0.06057	1
						-250.667	0.01191	0.06281	1
						-248	0.01268	0.06511	1
						-245.333	0.01351	0.06749	1
						-242.667	0.01437	0.06993	1
						-240	0.01529	0.07244	1
						-237.333	0.01626	0.07503	1
						-234.667	0.01728	0.07769	1
						-232	0.01836	0.08043	1
						-229.333	0.01949	0.08325	1
						-226.667	0.02069	0.08614	1
						-224	0.02195	0.08911	1
						-221.333	0.02328	0.09216	1
						-218.667	0.02467	0.0953	1
						-216	0.02614	0.09851	1
						-213.333	0.02768	0.10182	1
						-210.667	0.0293	0.1052	1
						-208	0.031	0.10868	1
						-205.333	0.03279	0.11224	1
						-202.667	0.03466	0.1159	1
						-200	0.03662	0.11964	1
						-197.333	0.03867	0.12347	1
						-194.667	0.04083	0.1274	1
						-192	0.04308	0.13142	1
						-189.333	0.04543	0.13554	1
						-186.667	0.04789	0.13975	1
						-184	0.05047	0.14406	1
						-181.333	0.05315	0.14847	1
						-178.667	0.05596	0.15298	1
						-176	0.05888	0.15758	1
						-173.333	0.06193	0.16229	1
						-170.667	0.06511	0.1671	1
						-168	0.06842	0.17201	1
						-165.333	0.07187	0.17702	1
						-162.667	0.07545	0.18213	1
						-160	0.07918	0.18735	1
						-157.333	0.08305	0.19267	1
						-154.667	0.08708	0.1981	1
						-152	0.09126	0.20363	1
						-149.333	0.09559	0.20927	1
						-146.667	0.10009	0.21501	1
						-144	0.10475	0.22085	1
						-141.333	0.10957	0.22681	1
						-138.667	0.11457	0.23286	1
						-136	0.11974	0.23903	1
						-133.333	0.12509	0.24529	1
						-130.667	0.13062	0.25167	1
						-128	0.13632	0.25814	1
						-125.333	0.14222	0.26473	1
						-122.667	0.1483	0.27141	1
						-120	0.15457	0.2782	1
						-117.333	0.16103	0.28509	1
						-114.667	0.16769	0.29208	1
						-112	0.17454	0.29918	1
						-109.333	0.18159	0.30637	1
						-106.667	0.18884	0.31366	1
						-104	0.19629	0.32105	1
						-101.333	0.20394	0.32854	1
						-98.6667	0.21179	0.33612	1
						-96	0.21985	0.34379	1
						-93.3333	0.2281	0.35156	1
						-90.6667	0.23656	0.35942	1
						-88	0.24523	0.36737	1
						-85.3333	0.25409	0.3754	1
						-82.6667	0.26316	0.38352	1
						-80	0.27242	0.39172	1
						-77.3333	0.28188	0.4	1
						-74.6667	0.29154	0.40836	1
						-72	0.30139	0.4168	1
						-69.3333	0.31144	0.42531	1
						-66.6667	0.32167	0.4339	1
						-64	0.33209	0.44255	1
						-61.3333	0.34269	0.45126	1
						-58.6667	0.35347	0.46005	1
						-56	0.36442	0.46889	1
						-53.3333	0.37554	0.47778	1
						-50.6667	0.38682	0.48673	1
						-48	0.39826	0.49574	1
						-45.3333	0.40986	0.50479	1
						-42.6667	0.4216	0.51388	1
						-40	0.43348	0.52301	1
						-37.3333	0.44549	0.53218	1
						-34.6667	0.45762	0.54138	1
						-32	0.46988	0.55062	1
						-29.3333	0.48224	0.55987	1
						-26.6667	0.4947	0.56915	1
						-24	0.50725	0.57845	1
						-21.3333	0.51989	0.58775	1
						-18.6667	0.5326	0.59707	1
						-16	0.54537	0.60639	1
						-13.3333	0.5582	0.61571	1
						-10.6667	0.57106	0.62503	1
						-8	0.58396	0.63434	1
						-5.33333	0.59688	0.64363	1
						-2.66667	0.60981	0.65291	1
						0	0.62273	0.66216	1
						2.66667	0.63564	0.67139	0.99982
						5.33333	0.64852	0.68058	0.99928
						8	0.66136	0.68974	0.99837
						10.6667	0.67415	0.69886	0.99711
						13.3333	0.68688	0.70793	0.99548
						16	0.69953	0.71694	0.9935
						18.6667	0.71208	0.7259	0.99117
						21.3333	0.72454	0.7348	0.98848
						24	0.73687	0.74363	0.98544
						26.6667	0.74908	0.75239	0.98206
						29.3333	0.76114	0.76108	0.97833
						32	0.77305	0.76968	0.97427
						34.6667	0.78478	0.77819	0.96987
						37.3333	0.79633	0.78662	0.96514
						40	0.80769	0.79494	0.96008
						42.6667	0.81883	0.80317	0.95471
						45.3333	0.82975	0.81129	0.94902
						48	0.84044	0.8193	0.94303
						50.6667	0.85087	0.82719	0.93673
						53.3333	0.86105	0.83496	0.93014
						56	0.87095	0.8426	0.92326
						58.6667	0.88056	0.85012	0.9161
						61.3333	0.88987	0.85749	0.90867
						64	0.89888	0.86473	0.90097
						66.6667	0.90756	0.87182	0.89301
						69.3333	0.91592	0.87876	0.8848
						72	0.92392	0.88555	0.87635
						74.6667	0.93158	0.89218	0.86767
						77.3333	0.93887	0.89865	0.85876
						80	0.94579	0.90495	0.84964
						82.6667	0.95233	0.91108	0.84031
						85.3333	0.95848	0.91704	0.83078
						88	0.96423	0.92281	0.82106
						90.6667	0.96957	0.92841	0.81116
						93.3333	0.9745	0.93381	0.80109
						96	0.97901	0.93903	0.79086
						98.6667	0.98309	0.94405	0.78047
						101.333	0.98675	0.94887	0.76995
						104	0.98996	0.9535	0.75929
						106.667	0.99274	0.95792	0.74851
						109.333	0.99507	0.96213	0.73761
						112	0.99696	0.96613	0.72661
						114.667	0.99839	0.96993	0.71551
						117.333	0.99937	0.9735	0.70433
						120	0.9999	0.97686	0.69307
						122.667	0.99997	0.98	0.68175
						125.333	0.99959	0.98292	0.67036
						128	0.99876	0.98561	0.65893
						130.667	0.99748	0.98807	0.64746
						133.333	0.99574	0.99031	0.63596
						136	0.99355	0.99232	0.62444
						138.667	0.99092	0.9941	0.6129
						141.333	0.98785	0.99564	0.60136
						144	0.98434	0.99696	0.58982
						146.667	0.9804	0.99804	0.57829
						149.333	0.97603	0.99888	0.56679
						152	0.97123	0.99949	0.55531
						154.667	0.96603	0.99986	0.54387
						157.333	0.96041	1	0.53247
						160	0.95439	0.9999	0.52112
						162.667	0.94798	0.99956	0.50983
						165.333	0.94118	0.99899	0.4986
						168	0.93401	0.99819	0.48744
						170.667	0.92648	0.99714	0.47636
						173.333	0.91858	0.99587	0.46537
						176	0.91034	0.99436	0.45446
						178.667	0.90177	0.99262	0.44365
						181.333	0.89286	0.99064	0.43294
						184	0.88365	0.98844	0.42233
						186.667	0.87413	0.98601	0.41183
						189.333	0.86433	0.98336	0.40145
						192	0.85424	0.98047	0.39119
						194.667	0.84389	0.97737	0.38106
						197.333	0.83329	0.97405	0.37105
						200	0.82244	0.97051	0.36117
						202.667	0.81137	0.96675	0.35143
						205.333	0.80008	0.96278	0.34183
						208	0.78859	0.9586	0.33237
						210.667	0.77692	0.95421	0.32306
						213.333	0.76507	0.94962	0.31389
						216	0.75305	0.94483	0.30487
						218.667	0.74089	0.93983	0.29601
						221.333	0.7286	0.93465	0.2873
						224	0.71618	0.92927	0.27874
						226.667	0.70366	0.92371	0.27034
						229.333	0.69104	0.91796	0.2621
						232	0.67834	0.91204	0.25402
						234.667	0.66557	0.90593	0.24609
						237.333	0.65274	0.89966	0.23833
						240	0.63987	0.89322	0.23073
						242.667	0.62697	0.88661	0.2233
						245.333	0.61405	0.87985	0.21602
						248	0.60112	0.87293	0.2089
						250.667	0.5882	0.86586	0.20195
						253.333	0.57529	0.85865	0.19515
						256	0.56242	0.85129	0.18852
						258.667	0.54958	0.8438	0.18205
						261.333	0.53679	0.83617	0.17573
						264	0.52405	0.82842	0.16958
						266.667	0.51139	0.82055	0.16358
						269.333	0.49881	0.81256	0.15773
						272	0.48632	0.80446	0.15204
						274.667	0.47392	0.79625	0.1465
						277.333	0.46163	0.78794	0.14111
						280	0.44946	0.77953	0.13587
						282.667	0.4374	0.77103	0.13078
						285.333	0.42548	0.76244	0.12583
						288	0.4137	0.75377	0.12103
						290.667	0.40205	0.74502	0.11636
						293.333	0.39056	0.7362	0.11184
						296	0.37923	0.72731	0.10745
						298.667	0.36805	0.71836	0.1032
						301.333	0.35704	0.70935	0.09908
						304	0.34621	0.70029	0.09509
						306.667	0.33555	0.69119	0.09123
						309.333	0.32507	0.68203	0.08749
						312	0.31478	0.67285	0.08388
						314.667	0.30467	0.66362	0.08039
						317.333	0.29475	0.65437	0.07701
						320	0.28503	0.6451	0.07375
						322.667	0.2755	0.63581	0.0706
						325.333	0.26617	0.6265	0.06756
						328	0.25704	0.61719	0.06463
						330.667	0.24811	0.60787	0.0618
						333.333	0.23938	0.59854	0.05908
						336	0.23086	0.58923	0.05645
						338.667	0.22253	0.57992	0.05393
						341.333	0.21441	0.57062	0.05149
						344	0.20649	0.56134	0.04915
						346.667	0.19878	0.55208	0.0469
						349.333	0.19126	0.54284	0.04474
						352	0.18395	0.53363	0.04266
						354.667	0.17683	0.52446	0.04066
						357.333	0.16992	0.51532	0.03874
						360	0.16319	0.50622	0.0369
						362.667	0.15667	0.49716	0.03513
						365.333	0.15034	0.48815	0.03344
						368	0.14419	0.47919	0.03181
						370.667	0.13824	0.47029	0.03026
						373.333	0.13247	0.46144	0.02877
						376	0.12688	0.45265	0.02734
						378.667	0.12148	0.44392	0.02597
						381.333	0.11625	0.43526	0.02467
						384	0.1112	0.42666	0.02342
						386.667	0.10631	0.41814	0.02222
						389.333	0.1016	0.40969	0.02108
						392	0.09705	0.40132	0.01999
						394.667	0.09266	0.39302	0.01896
						397.333	0.08843	0.38481	0.01796
						400	0.08436	0.37668	0.01702
						402.667	0.08044	0.36863	0.01611
						405.333	0.07666	0.36067	0.01525
						408	0.07303	0.3528	0.01443
						410.667	0.06954	0.34501	0.01365
						413.333	0.06618	0.33733	0.01291
						416	0.06296	0.32973	0.0122
						418.667	0.05987	0.32223	0.01153
						421.333	0.0569	0.31482	0.01089
						424	0.05406	0.30751	0.01028
						426.667	0.05134	0.30031	0.00971
						429.333	0.04873	0.2932	0.00916
						432	0.04623	0.28619	0.00864
						434.667	0.04384	0.27928	0.00815
						437.333	0.04155	0.27248	0.00768
						440	0.03937	0.26578	0.00723
						442.667	0.03728	0.25918	0.00681
						445.333	0.03529	0.25268	0.00641
						448	0.03339	0.24629	0.00604
						450.667	0.03158	0.24001	0.00568
						453.333	0.02985	0.23383	0.00534
						456	0.02821	0.22776	0.00502
						458.667	0.02664	0.22179	0.00472
						461.333	0.02515	0.21592	0.00443
						464	0.02373	0.21017	0.00416
						466.667	0.02238	0.20451	0.00391
						469.333	0.0211	0.19897	0.00367
						472	0.01988	0.19352	0.00344
						474.667	0.01872	0.18818	0.00323
						477.333	0.01763	0.18295	0.00302
						480	0.01659	0.17782	0.00283
						482.667	0.0156	0.17279	0.00265
						485.333	0.01467	0.16787	0.00249
						488	0.01378	0.16304	0.00233
						490.667	0.01295	0.15832	0.00218
						493.333	0.01216	0.1537	0.00204
						496	0.01141	0.14918	0.0019
						498.667	0.0107	0.14475	0.00178
						501.333	0.01003	0.14043	0.00166
						504	0.0094	0.1362	0.00155
						506.667	0.00881	0.13207	0.00145
						509.333	0.00825	0.12803	0.00135
						512	0.00772	0.12409	0.00126
						514.667	0.00722	0.12024	0.00118
						517.333	0.00675	0.11648	0.0011
						520	0.00631	0.11281	0.00102
						522.667	0.0059	0.10924	0.000953707
						525.333	0.0055	0.10575	0.000888207
						528	0.00514	0.10235	0.000826906
						530.667	0.00479	0.09903	0.000769557
						533.333	0.00447	0.0958	0.000715926
						536	0.00417	0.09265	0.000665791
						538.667	0.00388	0.08959	0.000618943
						541.333	0.00361	0.0866	0.000575183
						544	0.00336	0.0837	0.000534324
						546.667	0.00313	0.08087	0.000496187
						549.333	0.00291	0.07812	0.000460606
						552	0.00271	0.07545	0.000427421
						554.667	0.00251	0.07285	0.000396483
						557.333	0.00233	0.07032	0.000367652
						560	0.00217	0.06787	0.000340794
						562.667	0.00201	0.06548	0.000315783
						565.333	0.00186	0.06317	0.000292502
						568	0.00173	0.06092	0.00027084
						570.667	0.0016	0.05874	0.000250691
						573.333	0.00148	0.05662	0.000231957
						576	0.00137	0.05457	0.000214545
						578.667	0.00127	0.05257	0.000198368
						581.333	0.00118	0.05064	0.000183345
						584	0.00109	0.04877	0.000169398
						586.667	0.001	0.04696	0.000156455
						589.333	0.000927519	0.0452	0.000144449
						592	0.000856311	0.0435	0.000133316
						594.667	0.00079021	0.04185	0.000122997
						597.333	0.000728881	0.04026	0.000113435
						600	0.000672006	0.03871	0.000104578
						602.667	0.000619288	0.03722	9.64e-05
						605.333	0.000570447	0.03578	8.88e-05
						608	0.000525218	0.03438	8.18e-05
						610.667	0.000483356	0.03303	7.53e-05
						613.333	0.000444629	0.03173	6.93e-05
						616	0.000408818	0.03047	6.37e-05
						618.667	0.000375722	0.02926	5.86e-05
						621.333	0.000345147	0.02808	5.39e-05
						624	0.000316917	0.02695	4.95e-05
						626.667	0.000290864	0.02585	4.55e-05
						629.333	0.000266831	0.0248	4.18e-05
						632	0.000244672	0.02378	3.83e-05
						634.667	0.000224252	0.0228	3.52e-05
						637.333	0.000205443	0.02185	3.23e-05
						640	0.000188126	0.02094	2.96e-05
						642.667	0.00017219	0.02006	2.71e-05
						645.333	0.000157533	0.01922	2.48e-05
						648	0.000144058	0.0184	2.28e-05
						650.667	0.000131675	0.01762	2.08e-05
						653.333	0.000120303	0.01686	1.91e-05
						656	0.000109862	0.01614	1.74e-05
						658.667	0.000100283	0.01544	1.6e-05
						661.333	9.15e-05	0.01477	1.46e-05
						664	8.34e-05	0.01412	1.33e-05
						666.667	7.61e-05	0.0135	1.22e-05
						669.333	6.93e-05	0.0129	1.11e-05
						672	6.31e-05	0.01233	1.02e-05
						674.667	5.75e-05	0.01178	9.27e-06
						677.333	5.23e-05	0.01125	8.46e-06
						680	4.75e-05	0.01074	7.71e-06
						682.667	4.32e-05	0.01025	7.03e-06
						685.333	3.93e-05	0.00979	6.41e-06
						688	3.57e-05	0.00934	5.84e-06
						690.667	3.24e-05	0.00891	5.32e-06
						693.333	2.94e-05	0.0085	4.84e-06
						696	2.67e-05	0.0081	4.4e-06
						698.667	2.42e-05	0.00772	4.01e-06
						701.333	2.19e-05	0.00736	3.64e-06
						704	1.98e-05	0.00701	3.31e-06
						706.667	1.8e-05	0.00668	3.01e-06
						709.333	1.63e-05	0.00636	2.73e-06
						712	1.47e-05	0.00606	2.48e-06
						714.667	1.33e-05	0.00577	2.25e-06
						717.333	1.2e-05	0.00549	2.04e-06
						720	1.08e-05	0.00522	1.85e-06

## Sheet: Figure.2E
position (nm)	probability		position (nm)	Gaussian fit to probability
-240	0.06452		-240	0.02983
-160	0.12903		-239.52	0.02992
-80	0.48387		-239.039	0.03
0	0.25806		-238.559	0.03009
80	0.04839		-238.078	0.03018
160	0.01613		-237.598	0.03027
240	0		-237.117	0.03036
			-236.637	0.03046
			-236.156	0.03056
			-235.676	0.03066
			-235.195	0.03076
			-234.715	0.03087
			-234.234	0.03098
			-233.754	0.03109
			-233.273	0.0312
			-232.793	0.03132
			-232.312	0.03144
			-231.832	0.03156
			-231.351	0.03169
			-230.871	0.03182
			-230.39	0.03195
			-229.91	0.03208
			-229.429	0.03222
			-228.949	0.03236
			-228.468	0.03251
			-227.988	0.03265
			-227.508	0.03281
			-227.027	0.03296
			-226.547	0.03312
			-226.066	0.03328
			-225.586	0.03345
			-225.105	0.03362
			-224.625	0.03379
			-224.144	0.03397
			-223.664	0.03415
			-223.183	0.03433
			-222.703	0.03452
			-222.222	0.03472
			-221.742	0.03492
			-221.261	0.03512
			-220.781	0.03533
			-220.3	0.03554
			-219.82	0.03576
			-219.339	0.03598
			-218.859	0.0362
			-218.378	0.03643
			-217.898	0.03667
			-217.417	0.03691
			-216.937	0.03716
			-216.456	0.03741
			-215.976	0.03766
			-215.495	0.03793
			-215.015	0.03819
			-214.535	0.03847
			-214.054	0.03875
			-213.574	0.03903
			-213.093	0.03932
			-212.613	0.03962
			-212.132	0.03992
			-211.652	0.04023
			-211.171	0.04055
			-210.691	0.04087
			-210.21	0.04119
			-209.73	0.04153
			-209.249	0.04187
			-208.769	0.04222
			-208.288	0.04257
			-207.808	0.04294
			-207.327	0.04331
			-206.847	0.04368
			-206.366	0.04407
			-205.886	0.04446
			-205.405	0.04485
			-204.925	0.04526
			-204.444	0.04568
			-203.964	0.0461
			-203.483	0.04653
			-203.003	0.04696
			-202.523	0.04741
			-202.042	0.04787
			-201.562	0.04833
			-201.081	0.0488
			-200.601	0.04928
			-200.12	0.04977
			-199.64	0.05027
			-199.159	0.05077
			-198.679	0.05129
			-198.198	0.05181
			-197.718	0.05235
			-197.237	0.05289
			-196.757	0.05345
			-196.276	0.05401
			-195.796	0.05458
			-195.315	0.05516
			-194.835	0.05576
			-194.354	0.05636
			-193.874	0.05697
			-193.393	0.0576
			-192.913	0.05823
			-192.432	0.05888
			-191.952	0.05953
			-191.471	0.0602
			-190.991	0.06088
			-190.511	0.06157
			-190.03	0.06227
			-189.55	0.06298
			-189.069	0.0637
			-188.589	0.06444
			-188.108	0.06518
			-187.628	0.06594
			-187.147	0.06671
			-186.667	0.06749
			-186.186	0.06829
			-185.706	0.06909
			-185.225	0.06991
			-184.745	0.07074
			-184.264	0.07159
			-183.784	0.07244
			-183.303	0.07331
			-182.823	0.0742
			-182.342	0.07509
			-181.862	0.076
			-181.381	0.07693
			-180.901	0.07786
			-180.42	0.07881
			-179.94	0.07977
			-179.459	0.08075
			-178.979	0.08174
			-178.499	0.08275
			-178.018	0.08376
			-177.538	0.0848
			-177.057	0.08584
			-176.577	0.0869
			-176.096	0.08798
			-175.616	0.08907
			-175.135	0.09018
			-174.655	0.09129
			-174.174	0.09243
			-173.694	0.09358
			-173.213	0.09474
			-172.733	0.09592
			-172.252	0.09712
			-171.772	0.09832
			-171.291	0.09955
			-170.811	0.10079
			-170.33	0.10204
			-169.85	0.10332
			-169.369	0.1046
			-168.889	0.1059
			-168.408	0.10722
			-167.928	0.10855
			-167.447	0.1099
			-166.967	0.11127
			-166.486	0.11265
			-166.006	0.11404
			-165.526	0.11546
			-165.045	0.11689
			-164.565	0.11833
			-164.084	0.11979
			-163.604	0.12127
			-163.123	0.12276
			-162.643	0.12427
			-162.162	0.12579
			-161.682	0.12733
			-161.201	0.12889
			-160.721	0.13047
			-160.24	0.13206
			-160	0.13286
			-159.76	0.13366
			-159.279	0.13528
			-158.799	0.13692
			-158.318	0.13858
			-157.838	0.14025
			-157.357	0.14193
			-156.877	0.14364
			-156.396	0.14536
			-155.916	0.14709
			-155.435	0.14884
			-154.955	0.15061
			-154.474	0.15239
			-153.994	0.15419
			-153.514	0.15601
			-153.033	0.15784
			-152.553	0.15968
			-152.072	0.16155
			-151.592	0.16342
			-151.111	0.16532
			-150.631	0.16723
			-150.15	0.16915
			-149.67	0.17109
			-149.189	0.17304
			-148.709	0.17501
			-148.228	0.177
			-147.748	0.179
			-147.267	0.18101
			-146.787	0.18304
			-146.306	0.18509
			-145.826	0.18715
			-145.345	0.18922
			-144.865	0.1913
			-144.384	0.19341
			-143.904	0.19552
			-143.423	0.19765
			-142.943	0.19979
			-142.462	0.20195
			-141.982	0.20412
			-141.501	0.2063
			-141.021	0.20849
			-140.541	0.2107
			-140.06	0.21292
			-139.58	0.21515
			-139.099	0.2174
			-138.619	0.21965
			-138.138	0.22192
			-137.658	0.2242
			-137.177	0.22649
			-136.697	0.2288
			-136.216	0.23111
			-135.736	0.23343
			-135.255	0.23577
			-134.775	0.23811
			-134.294	0.24047
			-133.814	0.24283
			-133.333	0.2452
			-132.853	0.24758
			-132.372	0.24998
			-131.892	0.25238
			-131.411	0.25478
			-130.931	0.2572
			-130.45	0.25962
			-129.97	0.26206
			-129.489	0.26449
			-129.009	0.26694
			-128.529	0.26939
			-128.048	0.27185
			-127.568	0.27431
			-127.087	0.27678
			-126.607	0.27926
			-126.126	0.28174
			-125.646	0.28422
			-125.165	0.28671
			-124.685	0.2892
			-124.204	0.2917
			-123.724	0.2942
			-123.243	0.2967
			-122.763	0.29921
			-122.282	0.30171
			-121.802	0.30422
			-121.321	0.30673
			-120.841	0.30924
			-120.36	0.31176
			-119.88	0.31427
			-119.399	0.31678
			-118.919	0.31929
			-118.438	0.3218
			-117.958	0.32431
			-117.477	0.32682
			-116.997	0.32932
			-116.517	0.33183
			-116.036	0.33433
			-115.556	0.33682
			-115.075	0.33932
			-114.595	0.34181
			-114.114	0.34429
			-113.634	0.34677
			-113.153	0.34924
			-112.673	0.35171
			-112.192	0.35417
			-111.712	0.35663
			-111.231	0.35908
			-110.751	0.36152
			-110.27	0.36395
			-109.79	0.36637
			-109.309	0.36879
			-108.829	0.3712
			-108.348	0.37359
			-107.868	0.37598
			-107.387	0.37835
			-106.907	0.38072
			-106.426	0.38307
			-105.946	0.38541
			-105.465	0.38774
			-104.985	0.39006
			-104.504	0.39236
			-104.024	0.39465
			-103.544	0.39693
			-103.063	0.39919
			-102.583	0.40143
			-102.102	0.40366
			-101.622	0.40588
			-101.141	0.40808
			-100.661	0.41026
			-100.18	0.41242
			-99.6997	0.41457
			-99.2192	0.4167
			-98.7387	0.41881
			-98.2583	0.4209
			-97.7778	0.42297
			-97.2973	0.42503
			-96.8168	0.42706
			-96.3363	0.42907
			-95.8559	0.43106
			-95.3754	0.43303
			-94.8949	0.43498
			-94.4144	0.43691
			-93.9339	0.43881
			-93.4535	0.44069
			-92.973	0.44255
			-92.4925	0.44438
			-92.012	0.44619
			-91.5315	0.44797
			-91.0511	0.44973
			-90.5706	0.45147
			-90.0901	0.45318
			-89.6096	0.45486
			-89.1291	0.45652
			-88.6487	0.45815
			-88.1682	0.45975
			-87.6877	0.46132
			-87.2072	0.46287
			-86.7267	0.46439
			-86.2463	0.46588
			-85.7658	0.46734
			-85.2853	0.46878
			-84.8048	0.47018
			-84.3243	0.47156
			-83.8438	0.4729
			-83.3634	0.47421
			-82.8829	0.4755
			-82.4024	0.47675
			-81.9219	0.47797
			-81.4414	0.47916
			-80.961	0.48032
			-80.4805	0.48144
			-80	0.48254
			-79.5195	0.4836
			-79.039	0.48463
			-78.5586	0.48562
			-78.0781	0.48659
			-77.5976	0.48752
			-77.1171	0.48841
			-76.6366	0.48927
			-76.1562	0.4901
			-75.6757	0.4909
			-75.1952	0.49166
			-74.7147	0.49238
			-74.2342	0.49307
			-73.7537	0.49373
			-73.2733	0.49435
			-72.7928	0.49493
			-72.3123	0.49548
			-71.8318	0.496
			-71.3513	0.49648
			-70.8709	0.49692
			-70.3904	0.49733
			-69.9099	0.4977
			-69.4294	0.49803
			-68.9489	0.49833
			-68.4685	0.4986
			-67.988	0.49883
			-67.5075	0.49902
			-67.027	0.49917
			-66.5465	0.49929
			-66.0661	0.49938
			-65.5856	0.49942
			-65.1051	0.49943
			-64.6246	0.49941
			-64.1441	0.49935
			-63.6637	0.49925
			-63.1832	0.49911
			-62.7027	0.49894
			-62.2222	0.49873
			-61.7417	0.49849
			-61.2613	0.49821
			-60.7808	0.4979
			-60.3003	0.49755
			-59.8198	0.49716
			-59.3393	0.49674
			-58.8589	0.49628
			-58.3784	0.49578
			-57.8979	0.49525
			-57.4174	0.49469
			-56.9369	0.49409
			-56.4565	0.49345
			-55.976	0.49278
			-55.4955	0.49208
			-55.015	0.49134
			-54.5345	0.49056
			-54.054	0.48976
			-53.5736	0.48891
			-53.0931	0.48804
			-52.6126	0.48713
			-52.1321	0.48618
			-51.6516	0.48521
			-51.1712	0.4842
			-50.6907	0.48315
			-50.2102	0.48208
			-49.7297	0.48097
			-49.2493	0.47983
			-48.7688	0.47866
			-48.2883	0.47746
			-47.8078	0.47622
			-47.3273	0.47496
			-46.8469	0.47366
			-46.3664	0.47233
			-45.8859	0.47098
			-45.4054	0.46959
			-44.9249	0.46817
			-44.4444	0.46673
			-43.964	0.46525
			-43.4835	0.46375
			-43.003	0.46222
			-42.5225	0.46066
			-42.042	0.45907
			-41.5616	0.45746
			-41.0811	0.45582
			-40.6006	0.45415
			-40.1201	0.45246
			-39.6396	0.45074
			-39.1592	0.44899
			-38.6787	0.44722
			-38.1982	0.44542
			-37.7177	0.44361
			-37.2372	0.44176
			-36.7568	0.43989
			-36.2763	0.438
			-35.7958	0.43609
			-35.3153	0.43416
			-34.8348	0.4322
			-34.3543	0.43022
			-33.8739	0.42822
			-33.3934	0.4262
			-32.9129	0.42416
			-32.4324	0.4221
			-31.952	0.42002
			-31.4715	0.41792
			-30.991	0.4158
			-30.5105	0.41366
			-30.03	0.41151
			-29.5495	0.40933
			-29.0691	0.40715
			-28.5886	0.40494
			-28.1081	0.40272
			-27.6276	0.40048
			-27.1471	0.39823
			-26.6667	0.39596
			-26.1862	0.39368
			-25.7057	0.39139
			-25.2252	0.38908
			-24.7447	0.38676
			-24.2643	0.38442
			-23.7838	0.38208
			-23.3033	0.37972
			-22.8228	0.37735
			-22.3423	0.37497
			-21.8619	0.37258
			-21.3814	0.37018
			-20.9009	0.36777
			-20.4204	0.36535
			-19.9399	0.36292
			-19.4595	0.36048
			-18.979	0.35804
			-18.4985	0.35559
			-18.018	0.35313
			-17.5375	0.35067
			-17.0571	0.34819
			-16.5766	0.34572
			-16.0961	0.34324
			-15.6156	0.34075
			-15.1351	0.33826
			-14.6547	0.33576
			-14.1742	0.33327
			-13.6937	0.33077
			-13.2132	0.32826
			-12.7327	0.32575
			-12.2523	0.32325
			-11.7718	0.32074
			-11.2913	0.31823
			-10.8108	0.31571
			-10.3303	0.3132
			-9.84985	0.31069
			-9.36937	0.30818
			-8.88889	0.30567
			-8.40841	0.30316
			-7.92793	0.30065
			-7.44745	0.29814
			-6.96697	0.29564
			-6.48649	0.29314
			-6.00601	0.29064
			-5.52553	0.28815
			-5.04505	0.28566
			-4.56456	0.28317
			-4.08408	0.28069
			-3.6036	0.27821
			-3.12312	0.27574
			-2.64264	0.27327
			-2.16216	0.27081
			-1.68168	0.26835
			-1.2012	0.2659
			-0.72072	0.26346
			-0.24024	0.26102
			0	0.25981
			0.24024	0.2586
			0.72072	0.25617
			1.2012	0.25376
			1.68168	0.25136
			2.16216	0.24896
			2.64264	0.24657
			3.12312	0.24419
			3.6036	0.24183
			4.08408	0.23947
			4.56456	0.23712
			5.04505	0.23478
			5.52553	0.23245
			6.00601	0.23013
			6.48649	0.22782
			6.96697	0.22552
			7.44745	0.22323
			7.92793	0.22096
			8.40841	0.2187
			8.88889	0.21644
			9.36937	0.2142
			9.84985	0.21198
			10.3303	0.20976
			10.8108	0.20756
			11.2913	0.20537
			11.7718	0.20319
			12.2523	0.20103
			12.7327	0.19888
			13.2132	0.19674
			13.6937	0.19462
			14.1742	0.19251
			14.6547	0.19042
			15.1351	0.18834
			15.6156	0.18627
			16.0961	0.18422
			16.5766	0.18218
			17.0571	0.18016
			17.5375	0.17815
			18.018	0.17616
			18.4985	0.17418
			18.979	0.17221
			19.4595	0.17026
			19.9399	0.16833
			20.4204	0.16641
			20.9009	0.16451
			21.3814	0.16262
			21.8619	0.16075
			22.3423	0.1589
			22.8228	0.15706
			23.3033	0.15523
			23.7838	0.15343
			24.2643	0.15163
			24.7447	0.14986
			25.2252	0.1481
			25.7057	0.14635
			26.1862	0.14462
			26.6667	0.14291
			27.1471	0.14122
			27.6276	0.13954
			28.1081	0.13787
			28.5886	0.13622
			29.0691	0.13459
			29.5495	0.13298
			30.03	0.13138
			30.5105	0.1298
			30.991	0.12823
			31.4715	0.12668
			31.952	0.12514
			32.4324	0.12363
			32.9129	0.12212
			33.3934	0.12064
			33.8739	0.11917
			34.3543	0.11772
			34.8348	0.11628
			35.3153	0.11486
			35.7958	0.11345
			36.2763	0.11206
			36.7568	0.11069
			37.2372	0.10933
			37.7177	0.10799
			38.1982	0.10666
			38.6787	0.10535
			39.1592	0.10405
			39.6396	0.10277
			40.1201	0.10151
			40.6006	0.10026
			41.0811	0.09903
			41.5616	0.09781
			42.042	0.09661
			42.5225	0.09542
			43.003	0.09425
			43.4835	0.09309
			43.964	0.09195
			44.4444	0.09082
			44.9249	0.08971
			45.4054	0.08861
			45.8859	0.08752
			46.3664	0.08645
			46.8469	0.0854
			47.3273	0.08436
			47.8078	0.08333
			48.2883	0.08232
			48.7688	0.08132
			49.2493	0.08033
			49.7297	0.07936
			50.2102	0.07841
			50.6907	0.07746
			51.1712	0.07653
			51.6516	0.07562
			52.1321	0.07471
			52.6126	0.07382
			53.0931	0.07294
			53.5736	0.07208
			54.054	0.07123
			54.5345	0.07039
			55.015	0.06956
			55.4955	0.06875
			55.976	0.06795
			56.4565	0.06716
			56.9369	0.06638
			57.4174	0.06562
			57.8979	0.06486
			58.3784	0.06412
			58.8589	0.06339
			59.3393	0.06267
			59.8198	0.06197
			60.3003	0.06127
			60.7808	0.06059
			61.2613	0.05992
			61.7417	0.05925
			62.2222	0.0586
			62.7027	0.05796
			63.1832	0.05733
			63.6637	0.05671
			64.1441	0.0561
			64.6246	0.0555
			65.1051	0.05492
			65.5856	0.05434
			66.0661	0.05377
			66.5465	0.05321
			67.027	0.05266
			67.5075	0.05212
			67.988	0.05159
			68.4685	0.05107
			68.9489	0.05056
			69.4294	0.05005
			69.9099	0.04956
			70.3904	0.04907
			70.8709	0.0486
			71.3513	0.04813
			71.8318	0.04767
			72.3123	0.04722
			72.7928	0.04678
			73.2733	0.04634
			73.7537	0.04592
			74.2342	0.0455
			74.7147	0.04509
			75.1952	0.04468
			75.6757	0.04429
			76.1562	0.0439
			76.6366	0.04352
			77.1171	0.04315
			77.5976	0.04278
			78.0781	0.04242
			78.5586	0.04207
			79.039	0.04173
			79.5195	0.04139
			80	0.04105
			80.4805	0.04073
			80.961	0.04041
			81.4414	0.0401
			81.9219	0.03979
			82.4024	0.03949
			82.8829	0.0392
			83.3634	0.03891
			83.8438	0.03863
			84.3243	0.03835
			84.8048	0.03808
			85.2853	0.03781
			85.7658	0.03755
			86.2463	0.0373
			86.7267	0.03705
			87.2072	0.03681
			87.6877	0.03657
			88.1682	0.03633
			88.6487	0.03611
			89.1291	0.03588
			89.6096	0.03566
			90.0901	0.03545
			90.5706	0.03524
			91.0511	0.03503
			91.5315	0.03483
			92.012	0.03464
			92.4925	0.03444
			92.973	0.03426
			93.4535	0.03407
			93.9339	0.03389
			94.4144	0.03372
			94.8949	0.03354
			95.3754	0.03338
			95.8559	0.03321
			96.3363	0.03305
			96.8168	0.03289
			97.2973	0.03274
			97.7778	0.03259
			98.2583	0.03244
			98.7387	0.0323
			99.2192	0.03216
			99.6997	0.03202
			100.18	0.03189
			100.661	0.03176
			101.141	0.03163
			101.622	0.03151
			102.102	0.03139
			102.583	0.03127
			103.063	0.03115
			103.544	0.03104
			104.024	0.03093
			104.504	0.03082
			104.985	0.03072
			105.465	0.03061
			105.946	0.03051
			106.426	0.03042
			106.907	0.03032
			107.387	0.03023
			107.868	0.03014
			108.348	0.03005
			108.829	0.02996
			109.309	0.02988
			109.79	0.0298
			110.27	0.02972
			110.751	0.02964
			111.231	0.02956
			111.712	0.02949
			112.192	0.02942
			112.673	0.02935
			113.153	0.02928
			113.634	0.02921
			114.114	0.02915
			114.595	0.02908
			115.075	0.02902
			115.556	0.02896
			116.036	0.0289
			116.517	0.02885
			116.997	0.02879
			117.477	0.02874
			117.958	0.02868
			118.438	0.02863
			118.919	0.02858
			119.399	0.02853
			119.88	0.02848
			120.36	0.02844
			120.841	0.02839
			121.321	0.02835
			121.802	0.02831
			122.282	0.02827
			122.763	0.02823
			123.243	0.02819
			123.724	0.02815
			124.204	0.02811
			124.685	0.02808
			125.165	0.02804
			125.646	0.02801
			126.126	0.02797
			126.607	0.02794
			127.087	0.02791
			127.568	0.02788
			128.048	0.02785
			128.529	0.02782
			129.009	0.02779
			129.489	0.02777
			129.97	0.02774
			130.45	0.02771
			130.931	0.02769
			131.411	0.02766
			131.892	0.02764
			132.372	0.02762
			132.853	0.0276
			133.333	0.02757
			133.814	0.02755
			134.294	0.02753
			134.775	0.02751
			135.255	0.02749
			135.736	0.02747
			136.216	0.02746
			136.697	0.02744
			137.177	0.02742
			137.658	0.02741
			138.138	0.02739
			138.619	0.02737
			139.099	0.02736
			139.58	0.02734
			140.06	0.02733
			140.541	0.02732
			141.021	0.0273
			141.501	0.02729
			141.982	0.02728
			142.462	0.02727
			142.943	0.02725
			143.423	0.02724
			143.904	0.02723
			144.384	0.02722
			144.865	0.02721
			145.345	0.0272
			145.826	0.02719
			146.306	0.02718
			146.787	0.02717
			147.267	0.02716
			147.748	0.02715
			148.228	0.02715
			148.709	0.02714
			149.189	0.02713
			149.67	0.02712
			150.15	0.02711
			150.631	0.02711
			151.111	0.0271
			151.592	0.02709
			152.072	0.02709
			152.553	0.02708
			153.033	0.02707
			153.514	0.02707
			153.994	0.02706
			154.474	0.02706
			154.955	0.02705
			155.435	0.02705
			155.916	0.02704
			156.396	0.02704
			156.877	0.02703
			157.357	0.02703
			157.838	0.02702
			158.318	0.02702
			158.799	0.02702
			159.279	0.02701
			159.76	0.02701
			160	0.02701
			160.24	0.027
			160.721	0.027
			161.201	0.027
			161.682	0.02699
			162.162	0.02699
			162.643	0.02699
			163.123	0.02698
			163.604	0.02698
			164.084	0.02698
			164.565	0.02698
			165.045	0.02697
			165.526	0.02697
			166.006	0.02697
			166.486	0.02697
			166.967	0.02696
			167.447	0.02696
			167.928	0.02696
			168.408	0.02696
			168.889	0.02696
			169.369	0.02695
			169.85	0.02695
			170.33	0.02695
			170.811	0.02695
			171.291	0.02695
			171.772	0.02695
			172.252	0.02694
			172.733	0.02694
			173.213	0.02694
			173.694	0.02694
			174.174	0.02694
			174.655	0.02694
			175.135	0.02694
			175.616	0.02693
			176.096	0.02693
			176.577	0.02693
			177.057	0.02693
			177.538	0.02693
			178.018	0.02693
			178.499	0.02693
			178.979	0.02693
			179.459	0.02693
			179.94	0.02693
			180.42	0.02692
			180.901	0.02692
			181.381	0.02692
			181.862	0.02692
			182.342	0.02692
			182.823	0.02692
			183.303	0.02692
			183.784	0.02692
			184.264	0.02692
			184.745	0.02692
			185.225	0.02692
			185.706	0.02692
			186.186	0.02692
			186.667	0.02692
			187.147	0.02692
			187.628	0.02692
			188.108	0.02691
			188.589	0.02691
			189.069	0.02691
			189.55	0.02691
			190.03	0.02691
			190.511	0.02691
			190.991	0.02691
			191.471	0.02691
			191.952	0.02691
			192.432	0.02691
			192.913	0.02691
			193.393	0.02691
			193.874	0.02691
			194.354	0.02691
			194.835	0.02691
			195.315	0.02691
			195.796	0.02691
			196.276	0.02691
			196.757	0.02691
			197.237	0.02691
			197.718	0.02691
			198.198	0.02691
			198.679	0.02691
			199.159	0.02691
			199.64	0.02691
			200.12	0.02691
			200.601	0.02691
			201.081	0.02691
			201.562	0.02691
			202.042	0.02691
			202.523	0.02691
			203.003	0.02691
			203.483	0.02691
			203.964	0.02691
			204.444	0.02691
			204.925	0.02691
			205.405	0.02691
			205.886	0.02691
			206.366	0.02691
			206.847	0.02691
			207.327	0.02691
			207.808	0.02691
			208.288	0.02691
			208.769	0.02691
			209.249	0.02691
			209.73	0.02691
			210.21	0.02691
			210.691	0.02691
			211.171	0.02691
			211.652	0.02691
			212.132	0.02691
			212.613	0.0269
			213.093	0.0269
			213.574	0.0269
			214.054	0.0269
			214.535	0.0269
			215.015	0.0269
			215.495	0.0269
			215.976	0.0269
			216.456	0.0269
			216.937	0.0269
			217.417	0.0269
			217.898	0.0269
			218.378	0.0269
			218.859	0.0269
			219.339	0.0269
			219.82	0.0269
			220.3	0.0269
			220.781	0.0269
			221.261	0.0269
			221.742	0.0269
			222.222	0.0269
			222.703	0.0269
			223.183	0.0269
			223.664	0.0269
			224.144	0.0269
			224.625	0.0269
			225.105	0.0269
			225.586	0.0269
			226.066	0.0269
			226.547	0.0269
			227.027	0.0269
			227.508	0.0269
			227.988	0.0269
			228.468	0.0269
			228.949	0.0269
			229.429	0.0269
			229.91	0.0269
			230.39	0.0269
			230.871	0.0269
			231.351	0.0269
			231.832	0.0269
			232.312	0.0269
			232.793	0.0269
			233.273	0.0269
			233.754	0.0269
			234.234	0.0269
			234.715	0.0269
			235.195	0.0269
			235.676	0.0269
			236.156	0.0269
			236.637	0.0269
			237.117	0.0269
			237.598	0.0269
			238.078	0.0269
			240	0.0269
