# Supplementary material for: MCAK recognizes the nucleotide-dependent feature at growing microtubule ends
Source: eLife journal article supplement (doi:10.7554/elife.92958), 2023-11-17
Supplement: fig3-data1 [file Figure3_source data 1.xlsx]

## Sheet: Figure.3B
AMPPNP, kon (×10-6, s-1 nM-1tubulin dimer-1)			ADP, kon (×10-6, s-1 nM-1tubulin dimer-1)			APO, kon (×10-6, s-1 nM-1tubulin dimer-1)			p value of two-tailed Mann_x0002_Whitney U test with Bonferroni correction
end	lattce		end	lattce		end	lattce		endAMPNP<-> endATP:p< 0.001
19.943	0.87568		53.8145	23.1696		0	177.999		endADP<-> endATP:p>1
6.83761	1.06667		47.566	28.5396		0	198.279		endAPO<-> endATP:p<0.001
5.12821	0.6993		52.3096	31.3857		289.729	107.16		latticeAMPNP<-> latticeATP:p< 0.001
6.92065	0.19464		42.3569	27.2294		569.801	208.888		latticeADP<-> latticeATP:p< 0.001
6.21601	0.48228		47.8633	12.973		759.734	358.526		latticeAPO<-> latticeATP:p< 0.001
2.57053	2.1699		14.1712	12.2835		379.867	265.252
2.81383	0.77682		18.4089	4.85824		569.801	276.875
5.2063	0.56284		25.1912	9.27025		621.601	235.554
13.9353	0.58842		22.792	26.7054		203.5	281.077
5.2597	0.69742		19.536	9.85131		0	131.883
1.1396	0.28004		26.7094	11.0765		0	177.391
6.83761	0.33152		4.3276	16.2918		0	177.025
3.08	0.46551		17.5824	9.61773		828.801	213.041
1.1396	0.23027		8.99685	6.53456		949.668	191.262
4.45931	0.95557		15.1947	11.6975		0	114.198
6.93001	1.69714		15.5991	20.2327		379.867	132.837
5.69801	0.44114		26.5907	34.188		216.38	136.661
24.42	1.73788		30.7692	6.96735		189.934	161.518
4.44	0.33455		10.8533	12.1454		189.934	98.3828
4.57365	1.09929		35.3669	10.1841		569.801	153.081
3.59874	0.45299		46.7836	14.5977		949.668	408.77
6.97715	2.18428					759.734	200.614
9.11681	0.6689					0	118.385
2.65024	0.47091					569.801	145.886
3.4188	0.39196					379.867	154
3.79867	0.15339					189.934	105.656
10.2564	0.41487					189.934	211.472
12.21	0.90551					189.934	98.1475
1.80889	1.57953					759.734	390.336
						569.801	301.659
						759.734	458.387
						569.801	208.464
						379.867	163.579
						189.934	212.019
						189.934	451.54
						189.934	244.2

## Sheet: Figure.3C
RE/L					p value of two-tailed Mann_x0002_Whitney U test with Bonferroni correction
AMPPNP	ADP	APO			RE/L-AMPNP<-> RE/L-ATP:p>1
35.5556	2.32263	0			RE/L-ADP<-> RE/L-ATP:p<0.001
24.7654	1.66667	0			RE/L-APO<-> RE/L-ATP:p<0.001
24.7222	1.66667	2.7037
23.6826	1.55556	2.72778
22.7743	3.68946	2.11905
20.625	1.15367	1.4321
14.0516	3.78922	2.05797
13.6296	2.71742	2.63889
13.4841	0.85346	0.724
13.2718	1.98309	0
12.9167	2.41135	0
12.8889	0.26563	0
9.25	1.82813	3.89033
8.72222	1.37681	4.96528
7.94444	1.29897	0
7.54167	0.77099	2.85965
7.33333	0.77778	1.58333
6.61637	4.4162	1.17593
6.41026	0.89362	1.93056
5.62791	3.47277	3.72222
4.94907	3.20486	2.32323
4.66667		3.78704
4.16054		0
4.08333		3.9058
4.06944		2.46667
3.62222		1.79767
3.19426		0.89815
1.18463		1.93519
1.14521		1.94636
		1.88889
		1.65741
		2.73333
		2.32222
		0.89583
		0.42063
		0.77778

## Sheet: Figure.3D
dwell time (s)-AMPPNP		dwell time (s)-ADP		dwell time (s)-APO				p value of two-tailed Mann_x0002_Whitney U test with Bonferroni correction
end	lattice	end	lattice	end	lattice			endAMPNP<-> endATP:p< 0.001
0.225	0.25	3.1167	0.2	10.6005	1.5			endADP<-> endATP:p< 0.001
0.2333	0.25	3.025	0.2125	8.25	12.4002			endAPO<-> endATP:p< 0.001
0.25	0.2583	2.5	0.2167	6.0334	11.2501			latticeAMPNP<-> latticeATP:p< 0.001
0.325	0.2667	2.3	0.2167	5.7335	0.7667			latticeADP<-> latticeATP:p< 0.001
0.325	0.2667	1.9833	0.2167	5.2	0.3			latticeAPO<-> latticeATP:p< 0.001
0.3333	0.275	1.95	0.2167	5.1668	1.775
0.3417	0.3	1.9333	0.2167	5.0377	1
0.3667	0.3	1.475	0.2167	4.2334	5.5
0.3833	0.3	1.45	0.2167	4.075	3.5333
0.3833	0.3	1.3007	0.2167	3.75	8.9002
0.4	0.3	1.175	0.225	3.7333	10.8334
0.4167	0.3167	1.125	0.225	3.2337	2.5015
0.45	0.3417	1.05	0.225	2.8764	1.7334
0.45	0.35	1	0.225	2.6584	0.9333
0.4667	0.35	0.95	0.2333	2.6007	3.6337
0.475	0.35	0.9375	0.2333	2.5003	0.45
0.4833	0.35	0.9333	0.2333	2.4501	0.8
0.5	0.3667	0.9125	0.2333	2.4345	3.4
0.5333	0.375	0.8167	0.2333	2.4254	1.1333
0.55	0.375	0.8125	0.2333	2.1	0.8
0.5667	0.375	0.8	0.2333	2.1	0.9667
0.5667	0.375	0.8	0.2333	2.0667	3.7667
0.5667	0.375	0.7625	0.2333	2.0003	5.3335
0.575	0.375	0.75	0.2333	1.9835	0.3667
0.6	0.4	0.7375	0.2333	1.975	0.9667
0.6	0.4	0.7333	0.2333	1.9667	0.6
0.6	0.4	0.725	0.2333	1.9167	1.1667
0.6	0.4167	0.725	0.2333	1.8167	2.7334
0.6	0.4167	0.725	0.2333	1.65	0.6667
0.6167	0.4333	0.7	0.2333	1.6174	0.4
0.625	0.4333	0.6833	0.2333	1.5333	1.45
0.6333	0.4333	0.65	0.2333	1.4667	0.25
0.65	0.45	0.65	0.2333	1.2667	0.6
0.675	0.4667	0.6333	0.2375	1.225	0.475
0.7	0.4667	0.625	0.2375	1.2167	3.8004
0.7	0.4667	0.625	0.2375	1.2167	0.35
0.725	0.4667	0.6167	0.2375	1.2	0.575
0.725	0.475	0.6167	0.2417	1.125	2.025
0.725	0.475	0.6167	0.2417	1.1083	4.175
0.75	0.475	0.6083	0.2417	1.075	1.45
0.75	0.475	0.6	0.2417	1.05	0.25
0.75	0.475	0.6	0.2417	0.98301	1.625
0.7667	0.5	0.6	0.2417	0.975	0.275
0.7667	0.5	0.6	0.25	0.85	0.8
0.775	0.5	0.6	0.25	0.8	1.75
0.7833	0.5	0.6	0.25	0.7833	1.625
0.825	0.525	0.5833	0.25	0.7833	0.925
0.875	0.525	0.5833	0.25	0.76083	0.525
0.9	0.5333	0.5833	0.25	0.75	0.45
0.9	0.55	0.575	0.25	0.735	1.975
0.9333	0.55	0.575	0.25	0.7	0.825
0.9333	0.55	0.575	0.25	0.65	0.3625
0.95	0.575	0.5667	0.25	0.6333	0.35
0.9667	0.5833	0.5667	0.25	0.6	1.1
0.975	0.5833	0.5667	0.25	0.525	1.475
1	0.6	0.5667	0.25	0.5	0.425
1	0.6333	0.5667	0.25	0.5	1.575
1.0333	0.6333	0.5625	0.25	0.5	3.275
1.0667	0.65	0.5583	0.25	0.4833	0.425
1.075	0.65	0.55	0.25	0.45	1.9
1.1	0.6667	0.55	0.25	0.45	0.325
1.1	0.6667	0.55	0.25	0.4375	1.225
1.1	0.6667	0.55	0.25	0.4167	1.45
1.1333	0.7	0.55	0.25	0.4	0.625
1.1333	0.7	0.55	0.25	0.3667	0.725
1.1333	0.7	0.55	0.25	0.3333	1.475
1.15	0.7	0.5375	0.25	0.3333	5.3007
1.15	0.7	0.5333	0.25	0.2833	1.2011
1.1667	0.725	0.5333	0.25	0.275	2.9006
1.175	0.725	0.525	0.25	0.2583	1.2
1.2	0.7333	0.525	0.25	0.2417	0.4167
1.2667	0.7333	0.525	0.25		0.7
1.2667	0.7333	0.5167	0.25		0.25
1.3	0.7333	0.5167	0.25		3.9167
1.3	0.75	0.5167	0.25		1.3
1.3	0.75	0.5167	0.25		0.6
1.3333	0.75	0.5167	0.25		0.55
1.35	0.775	0.5125	0.25		2.7501
1.3667	0.8	0.5125	0.25		0.375
1.4	0.8	0.5	0.25		2.8
1.4	0.8	0.5	0.25		0.2667
1.4	0.8	0.5	0.25		0.3
1.4	0.8	0.5	0.25		0.9667
1.45	0.8333	0.5	0.25		2.2515
1.475	0.85	0.5	0.25		0.4
1.4833	0.85	0.5	0.25		1.8005
1.5	0.9	0.5	0.25		0.6
1.5	0.9	0.4833	0.25		0.5
1.5	0.9	0.4833	0.25		0.4833
1.525	0.9	0.4833	0.25		0.3167
1.5333	0.925	0.475	0.25		5.167
1.6	0.95	0.475	0.25		0.45
1.6	0.9667	0.475	0.25		1.6667
1.6	0.9667	0.4667	0.25		0.45
1.65	0.9667	0.4667	0.25		0.3167
1.6667	0.9667	0.4667	0.25		2.7
1.675	0.975	0.45	0.2542		5.5343
1.7	0.975	0.45	0.2542		0.3833
1.7333	1.05	0.45	0.2542		0.3167
1.7333	1.05	0.45	0.2583		0.5
1.7667	1.075	0.45	0.2583		0.4333
1.775	1.1	0.45	0.2583		0.475
1.8	1.1	0.45	0.2583		0.35
1.8333	1.1	0.45	0.2583		1.3751
1.875	1.1333	0.45	0.2583		0.35
1.875	1.1333	0.45	0.2583		1.225
1.9	1.15	0.45	0.2583		0.525
1.925	1.2	0.4333	0.2583		8.8509
1.925	1.225	0.4333	0.2583		0.575
1.9667	1.2667	0.4333	0.2583		1.6253
1.9667	1.3	0.4333	0.2583		0.55
1.975	1.3	0.425	0.2583		1.225
2	1.4	0.425	0.2583		5.7258
2	1.4004	0.425	0.2583		0.575
2	1.4167	0.425	0.2625		0.375
2	1.5	0.425	0.2625		1.925
2.05	1.6	0.4167	0.2625		2.5001
2.05	1.675	0.4167	0.2625		4.1754
2.05	1.675	0.4167	0.2625		2.2751
2.05	1.6833	0.4167	0.2625		0.8
2.05	1.7	0.4167	0.2625		1.675
2.1	1.775	0.4167	0.2625		0.7
2.15	1.7833	0.4167	0.2625		1.525
2.15	1.8333	0.4167	0.2625		7.7
2.1833	1.8667	0.4167	0.2625		1.4254
2.2	1.9	0.4125	0.2625		0.4333
2.2	1.9667	0.4125	0.2625		1.45
2.2	2.4001	0.4	0.2667		4.65
2.2	2.575	0.4	0.2667		1.1
2.2	2.6	0.4	0.2667		1.9764
2.2333	3.5333	0.4	0.2667		0.25
2.25	3.9333	0.4	0.2667		6.9504
2.25	4.85	0.4	0.2667		0.425
2.25	4.95	0.4	0.2667		1.45
2.3	5.65	0.4	0.2667		0.75
2.3	6.375	0.4	0.2667		0.525
2.35	6.7667	0.4	0.2667		0.7667
2.3833	8.675	0.4	0.2667		2.2503
2.4	11.2667	0.4	0.2667		0.4833
2.4667	11.5	0.4	0.2667		2.2
2.55	16.6667	0.4	0.2667		3.05
2.55	17.2	0.4	0.2667		4.017
2.575		0.4	0.2667		0.4
2.6		0.4	0.2667		1
2.6001		0.3958	0.2667		0.55
2.65		0.3833	0.2667		0.25
2.65		0.3833	0.2667		0.3833
2.7		0.3833	0.2667		1.3833
2.7		0.3833	0.2667		0.5333
2.85		0.3833	0.2667		1.55
2.8667		0.3833	0.2667		1.6333
2.9333		0.375	0.2667		0.9172
3.0333		0.375	0.2667		1.7
3.05		0.375	0.2667		0.4167
3.1333		0.375	0.2667		0.45
3.2833		0.375	0.2667		0.6
3.2833		0.375	0.2667		0.6
3.4		0.375	0.2667		0.5667
3.4		0.375	0.2667		0.35
3.4833		0.375	0.2667		0.2417
3.5667		0.375	0.2667		1.3515
3.5667		0.3667	0.2667		0.775
3.6		0.3667	0.2667		1.4
3.6		0.3667	0.2667		1.2
3.625		0.3667	0.2667		1.475
3.7		0.3667	0.2667		0.475
3.775		0.3667	0.2667		0.9
3.825		0.3667	0.2667		2.375
3.9333		0.3625	0.2667		0.55
3.95		0.3625	0.2667		0.375
3.95		0.3583	0.2667		2.475
4.275		0.35	0.2667		0.575
4.3333		0.35	0.2667		0.725
4.35		0.35	0.2667		0.525
4.4		0.35	0.2667		0.35
4.4667		0.35	0.2708		0.3667
4.5		0.35	0.2708		1
4.525		0.35	0.2708		0.9
4.5333		0.35	0.2708		1.4841
4.65		0.35	0.275		0.4667
4.925		0.35	0.275		0.4
5		0.35	0.275		2.2667
5.0167		0.35	0.275		6.1836
5.2333		0.35	0.275		2.4337
5.4		0.35	0.275		1.1
5.4833		0.35	0.275		0.6833
5.5002		0.35	0.275		0.4833
5.5667		0.35	0.275		3.65
5.7		0.3458	0.275		0.425
5.7667		0.3417	0.275		0.475
5.8667		0.3417	0.275		0.3833
5.9		0.3375	0.275		0.6083
5.9333		0.3375	0.275		0.9
6		0.3375	0.275		0.6167
6		0.3375	0.275		0.2833
6.1167		0.3333	0.275		0.7833
6.1333		0.3333	0.275		0.95
6.2		0.3333	0.275		0.4
6.25		0.3333	0.275		1.4757
6.3		0.3333	0.275		1.7004
6.4333		0.3333	0.275		0.7833
6.4333		0.3333	0.275		1.4333
6.5833		0.3333	0.275		0.9667
6.6333		0.3333	0.275		0.6
6.7		0.3333	0.275		2.1167
6.875		0.325	0.275		0.35
7.2		0.325	0.275		0.4
7.35		0.325	0.275		3.4503
7.5667		0.325	0.275		3.1341
8		0.325	0.275		0.5333
8.2		0.325	0.275		0.2667
8.35		0.3167	0.2833		0.55
8.675		0.3167	0.2833		3.2838
9.1333		0.3167	0.2833		0.817
9.5667		0.3167	0.2833		0.4167
9.7667		0.3167	0.2833		1.2834
9.85		0.3167	0.2833		0.9
10		0.3167	0.2833		2.4667
10.2833		0.3167	0.2833		1.2667
10.4333		0.3167	0.2833		1.0167
11.35		0.3167	0.2833		0.5333
11.47		0.3167	0.2833		0.625
11.8		0.3125	0.2833		3.9
12.1		0.3125	0.2833		3.625
13.875		0.3083	0.2833		1.05
16.6667		0.3083	0.2833		2.8501
17.1		0.3083	0.2833		0.375
17.4		0.3	0.2833		1.4875
18.6		0.3	0.2833		0.725
20.1		0.3	0.2833		3.5
21.5		0.3	0.2833		3.175
		0.3	0.2833		1.7001
		0.3	0.2833		1.275
		0.3	0.2833		1.05
		0.3	0.2833		1.875
		0.3	0.2833		0.65
		0.3	0.2833		1.275
		0.3	0.2833		1.5251
		0.3	0.2833		2.2001
		0.3	0.2833		1.3501
		0.3	0.2833		0.275
		0.3	0.2833		2.625
		0.3	0.2833		1
		0.2875	0.2833		1.25
		0.2875	0.2833		0.475
		0.2833	0.2833		0.25
		0.2833	0.2833		0.475
		0.2833	0.2833		0.65
		0.2833	0.2833		0.625
		0.2833	0.2875		0.575
		0.2833	0.2875		0.525
		0.2833	0.2875		0.575
		0.2833	0.2875		1.6001
		0.2833	0.2875		8.8253
		0.2833	0.2917		1
		0.2833	0.2917		1.2
		0.2771	0.3		2.1667
		0.275	0.3		0.6333
		0.275	0.3		2.3334
		0.275	0.3		0.7251
		0.275	0.3		0.425
		0.275	0.3		8.025
		0.275	0.3		1.6174
		0.275	0.3		0.4
		0.275	0.3		1.1167
		0.275	0.3		0.6
		0.275	0.3		0.25
		0.2667	0.3		1.9
		0.2667	0.3		1.2333
		0.2667	0.3		0.8
		0.2667	0.3		0.6333
		0.2667	0.3		0.9
		0.2667	0.3		2.2503
		0.2667	0.3		0.35
		0.2667	0.3		0.6833
		0.2667	0.3		0.3667
		0.2667	0.3		0.9667
		0.2667	0.3		0.35
		0.2667	0.3		5.4704
		0.2667	0.3		4.0506
		0.2667	0.3		1.35
		0.2625	0.3		2.75
		0.2625	0.3		0.5333
		0.2625	0.3		0.875
		0.2625	0.3		7.6672
		0.2583	0.3		2.3167
		0.2583	0.3		5.8669
		0.2542	0.3		2.0502
		0.25	0.3		0.5667
		0.25	0.3		2.2506
		0.25	0.3		3.2001
		0.25	0.3		0.65
		0.25	0.3		5.4508
		0.25	0.3		0.3333
		0.25	0.3		12.6848
		0.25	0.3		0.35
		0.25	0.3		2.1339
		0.25	0.3		0.5
		0.25	0.3		0.4167
		0.25	0.3		0.4667
		0.25	0.3		2.3167
		0.25	0.3		4.7506
		0.25	0.3		2.4834
		0.25	0.3		2.8501
		0.25	0.3		1.0628
		0.25	0.3		1.2132
		0.25	0.3		0.3583
		0.25	0.3		0.3
		0.25	0.3		0.2667
		0.2417	0.3		0.5375
		0.2375	0.3		0.5
		0.2375	0.3		3.0505
		0.2375	0.3		3.1632
		0.2375	0.3		0.4875
		0.2333	0.3		1.6003
		0.2333	0.3		1.5379
		0.2333	0.3		6.7767
		0.2333	0.3		0.475
		0.2333	0.3		0.625
		0.225	0.3		0.3
		0.225	0.3		0.5125
		0.225	0.3		2.5264
		0.2167	0.3		2.0004
		0.2167	0.3		1.0375
		0.2167	0.3		0.6375
		0.2167	0.3		0.575
		0.2125	0.3		4.4502
			0.3		1.05
			0.3		3.1172
			0.3		1.3501
			0.3038		0.6833
			0.3042		0.55
			0.3083		1.0168
			0.3083		0.4167
			0.3083		1
			0.3083		3.9333
			0.3083		1.15
			0.3083		1.9673
			0.3083		0.7333
			0.3125		0.6833
			0.3125		1.1667
			0.3125		0.7833
			0.3125		1.5
			0.3125		1.7
			0.3125		0.6333
			0.3125		0.85
			0.3167		0.2417
			0.3167		1.375
			0.3167		0.85
			0.3167		2.2766
			0.3167		5.325
			0.3167		0.325
			0.3167		0.8
			0.3167		2.15
			0.3167		0.45
			0.3167		0.525
			0.3167		1.325
			0.3167		1.15
			0.3167		1.5667
			0.3167		1.8252
			0.3167		0.95
			0.3167		2.4253
			0.3167		1.8503
			0.3167		5.8014
			0.3167		3.4836
			0.3167		1.275
			0.3167		1.4001
			0.3167		7.1262
			0.3167		0.45
			0.3167		2.9753
			0.3167		0.4
			0.3167		0.4333
			0.3167		1.7
			0.3167		4.1251
			0.3167		1.275
			0.3167		0.475
			0.3167		1.1
			0.3167		2.2257
			0.3167		0.525
			0.3167		1.6667
			0.3167		2.2917
			0.3167		0.4
			0.3208		1.1
			0.3208		0.3833
			0.325		0.9167
			0.325		1.1167
			0.325		3.1883
			0.325		0.4833
			0.325		0.6
			0.325		3.1
			0.325		1.1167
			0.325		0.4833
			0.325		1.1833
			0.325		0.6
			0.325		1.0001
			0.325		2.55
			0.325		1
			0.325		0.2667
			0.325		1.2333
			0.325		3.3188
			0.325		0.5
			0.325		0.6333
			0.325		0.3167
			0.325		2.317
			0.325		0.65
			0.325		3.35
			0.325		0.7667
			0.325		4.5862
			0.325		1.2333
			0.325		1.9837
			0.325		2.1168
			0.325		2.5167
			0.325		0.8833
			0.325		1.4504
			0.325		4.3333
			0.325		1.775
			0.325		1.35
			0.325		4.1751
			0.325		1.2
			0.325		1.125
			0.325		2.3257
			0.325		3.5004
			0.325		2.8572
			0.325		0.85
			0.325		0.625
			0.325		1.5755
			0.325		0.725
			0.325		1.2509
			0.325		0.95
			0.3292		0.8001
			0.3292		1.325
			0.3333		1.25
			0.3333		2.3
			0.3333		3.025
			0.3333		3.3255
			0.3333		0.925
			0.3333		2.4007
			0.3333		1.2502
			0.3333		15.1339
			0.3333		3.4333
			0.3333		1.1667
			0.3333		4.9752
			0.3333		3.0834
			0.3333		3.1002
			0.3333		8.1669
			0.3333		7.068
			0.3333		3.3334
			0.3333		0.8667
			0.3333		4.5667
			0.3333		0.6333
			0.3333		0.7333
			0.3333		2.3667
			0.3333		1.2
			0.3333		1.4333
			0.3333		0.6333
			0.3333		2.1667
			0.3333		5.1668
			0.3333		2.0333
			0.3333		0.45
			0.3333		1.6504
			0.3333		2.1503
			0.3333		0.75
			0.3333		0.55
			0.3333		1.4502
			0.3333		1.8258
			0.3333		0.4333
			0.3333		0.725
			0.3333		1.4501
			0.3333		1.525
			0.3333		7.252
			0.3333		0.4667
			0.3333		5.0758
			0.3333		0.45
			0.3333		0.3833
			0.3333		3.1359
			0.3333		1.8833
			0.3375		1.15
			0.3375		3.6346
			0.3375		1.1667
			0.3375		0.35
			0.3375		0.4
			0.3375		4.6006
			0.3375		2.2167
			0.3375		0.25
			0.3375		1.4518
			0.3375		0.75
			0.3417		1.15
			0.3417		0.35
			0.3417		0.8833
			0.3417		9.2515
			0.35		0.5
			0.35		1.2333
			0.35		1.05
			0.35		0.4167
			0.35		2.3001
			0.35		2.6667
			0.35		1.0833
			0.35		0.4667
			0.35		1.3333
			0.35		0.4667
			0.35		4.0514
			0.35		2.6671
			0.35		0.9167
			0.35		0.3833
			0.35		0.5833
			0.35		1.6502
			0.35		0.4167
			0.35		0.3333
			0.35		1.1833
			0.35		0.8833
			0.35		0.6
			0.35		0.5167
			0.35		1.0333
			0.35		2.0751
			0.35		0.9002
			0.35		0.3167
			0.35		0.4167
			0.35		0.2667
			0.35		0.3333
			0.35		0.4
			0.35		0.4167
			0.35		4.6668
			0.35		0.4
			0.35		0.6833
			0.35		0.4167
			0.35		2.55
			0.35		1.9083
			0.35		1.9
			0.35		0.3833
			0.35		1.0667
			0.35		0.45
			0.35		0.3
			0.35		0.2667
			0.35		0.6
			0.35		3.8002
			0.35		1.5167
			0.35		1.6669
			0.35		6.5669
			0.35		0.6333
			0.35		0.55
			0.35		1
			0.35		1.175
			0.35		1.6505
			0.35		1.6002
			0.35		4.0278
			0.35		1.3005
			0.35		1.3
			0.35		0.8
			0.35		3.85
			0.35		5.8003
			0.35		0.85
			0.35		0.4
			0.35		1.0083
			0.35		0.9167
			0.35		0.5
			0.35		0.6667
			0.35		1.0583
			0.35		0.45
			0.35		0.5833
			0.35		0.2833
			0.35		2.15
			0.35		0.7333
			0.35		3.2379
			0.3542		0.4125
			0.3583		2.8255
			0.3583		1.2377
			0.3583		1.1502
			0.3625		1.4375
			0.3625		1.0125
			0.3625		1.525
			0.3667		0.5125
			0.3667		1.175
			0.3667		2.8506
			0.3667
			0.3667
			0.3667
			0.3667
			0.3667
			0.3667
			0.3667
			0.3667
			0.3667
			0.3667
			0.3667
			0.3667
			0.3667
			0.3667
			0.3667
			0.3667
			0.3667
			0.3667
			0.3667
			0.3667
			0.3667
			0.3667
			0.3667
			0.3667
			0.3667
			0.3667
			0.3667
			0.3667
			0.3667
			0.3708
			0.375
			0.375
			0.375
			0.375
			0.375
			0.375
			0.375
			0.375
			0.375
			0.375
			0.375
			0.375
			0.375
			0.375
			0.375
			0.375
			0.375
			0.375
			0.375
			0.375
			0.375
			0.375
			0.375
			0.375
			0.375
			0.3833
			0.3833
			0.3833
			0.3833
			0.3833
			0.3833
			0.3833
			0.3833
			0.3833
			0.3833
			0.3833
			0.3833
			0.3833
			0.3833
			0.3833
			0.3833
			0.3833
			0.3833
			0.3833
			0.3833
			0.3833
			0.3833
			0.3833
			0.3833
			0.3833
			0.3875
			0.3875
			0.3875
			0.3917
			0.3958
			0.4
			0.4
			0.4
			0.4
			0.4
			0.4
			0.4
			0.4
			0.4
			0.4
			0.4
			0.4
			0.4
			0.4
			0.4
			0.4
			0.4
			0.4
			0.4
			0.4
			0.4
			0.4
			0.4
			0.4
			0.4
			0.4
			0.4
			0.4
			0.4
			0.4
			0.4
			0.4
			0.4
			0.4
			0.4
			0.4
			0.4
			0.4
			0.4
			0.4
			0.4
			0.4
			0.4
			0.4
			0.4
			0.4
			0.4
			0.4
			0.4
			0.4
			0.4
			0.4029
			0.4083
			0.4083
			0.4083
			0.4125
			0.4125
			0.4125
			0.4167
			0.4167
			0.4167
			0.4167
			0.4167
			0.4167
			0.4167
			0.4167
			0.4167
			0.4167
			0.4167
			0.4167
			0.4167
			0.4167
			0.4167
			0.4167
			0.4167
			0.4167
			0.425
			0.425
			0.425
			0.425
			0.425
			0.425
			0.425
			0.425
			0.425
			0.425
			0.425
			0.425
			0.425
			0.425
			0.425
			0.425
			0.425
			0.425
			0.425
			0.425
			0.425
			0.425
			0.425
			0.425
			0.4292
			0.4333
			0.4333
			0.4333
			0.4333
			0.4333
			0.4333
			0.4333
			0.4333
			0.4333
			0.4333
			0.4333
			0.4333
			0.4333
			0.4333
			0.4333
			0.4333
			0.4333
			0.4333
			0.4333
			0.4333
			0.4333
			0.4333
			0.4333
			0.4333
			0.4333
			0.4333
			0.4333
			0.4333
			0.4333
			0.4333
			0.4333
			0.4333
			0.4333
			0.4375
			0.4375
			0.4375
			0.4417
			0.4417
			0.4417
			0.4417
			0.4417
			0.4458
			0.45
			0.45
			0.45
			0.45
			0.45
			0.45
			0.45
			0.45
			0.45
			0.45
			0.45
			0.45
			0.45
			0.45
			0.45
			0.45
			0.45
			0.45
			0.45
			0.45
			0.45
			0.45
			0.45
			0.45
			0.45
			0.45
			0.45
			0.45
			0.45
			0.45
			0.45
			0.45
			0.45
			0.45
			0.45
			0.45
			0.45
			0.45
			0.45
			0.4583
			0.4583
			0.4583
			0.4583
			0.4625
			0.4625
			0.4625
			0.4625
			0.4667
			0.4667
			0.4667
			0.4667
			0.4667
			0.4667
			0.4667
			0.4667
			0.4667
			0.4667
			0.4667
			0.4667
			0.4667
			0.4667
			0.4667
			0.4667
			0.4667
			0.4667
			0.475
			0.475
			0.475
			0.475
			0.475
			0.475
			0.475
			0.4833
			0.4833
			0.4833
			0.4833
			0.4833
			0.4833
			0.4833
			0.4833
			0.4833
			0.4833
			0.4875
			0.4917
			0.5
			0.5
			0.5
			0.5
			0.5
			0.5
			0.5
			0.5
			0.5
			0.5
			0.5
			0.5
			0.5
			0.5
			0.5
			0.5
			0.5
			0.5
			0.5
			0.5
			0.5
			0.5
			0.5
			0.5
			0.5167
			0.5167
			0.5167
			0.5167
			0.5167
			0.5167
			0.5167
			0.5167
			0.5167
			0.5167
			0.5167
			0.5167
			0.5167
			0.5167
			0.5167
			0.5167
			0.5167
			0.5167
			0.5208
			0.525
			0.525
			0.525
			0.525
			0.525
			0.525
			0.525
			0.525
			0.525
			0.525
			0.525
			0.525
			0.525
			0.525
			0.525
			0.525
			0.5333
			0.5333
			0.5333
			0.5333
			0.5333
			0.5333
			0.5333
			0.5333
			0.5333
			0.5333
			0.5375
			0.5375
			0.5375
			0.5375
			0.5417
			0.55
			0.55
			0.55
			0.55
			0.55
			0.55
			0.55
			0.55
			0.55
			0.55
			0.55
			0.55
			0.55
			0.55
			0.55
			0.55
			0.55
			0.55
			0.55
			0.55
			0.55
			0.55
			0.55
			0.5625
			0.5625
			0.5667
			0.5667
			0.5667
			0.5667
			0.5667
			0.5667
			0.5667
			0.5667
			0.575
			0.575
			0.575
			0.575
			0.575
			0.5833
			0.5833
			0.5833
			0.5833
			0.5833
			0.5875
			0.6
			0.6
			0.6
			0.6
			0.6
			0.6
			0.6
			0.6
			0.6
			0.6
			0.6
			0.6
			0.6
			0.6
			0.6
			0.6
			0.6
			0.6019
			0.6083
			0.6125
			0.6167
			0.6167
			0.6167
			0.6167
			0.6167
			0.6167
			0.6167
			0.6167
			0.6167
			0.6167
			0.625
			0.625
			0.625
			0.625
			0.625
			0.625
			0.625
			0.625
			0.625
			0.6333
			0.6333
			0.6333
			0.6333
			0.6333
			0.6333
			0.6333
			0.6417
			0.65
			0.65
			0.65
			0.65
			0.65
			0.65
			0.65
			0.65
			0.65
			0.65
			0.65
			0.65
			0.6667
			0.6667
			0.6667
			0.6667
			0.6667
			0.675
			0.675
			0.675
			0.675
			0.6833
			0.6833
			0.6833
			0.7
			0.7
			0.7
			0.7
			0.7
			0.7
			0.7
			0.7
			0.7167
			0.7167
			0.725
			0.725
			0.7333
			0.7333
			0.7333
			0.7333
			0.7333
			0.75
			0.75
			0.75
			0.75
			0.75
			0.7536
			0.775
			0.7833
			0.7833
			0.8
			0.8
			0.8
			0.8
			0.8
			0.8167
			0.8167
			0.8167
			0.825
			0.825
			0.8417
			0.85
			0.85
			0.85
			0.85
			0.85
			0.85
			0.85
			0.8625
			0.8667
			0.875
			0.9
			0.9
			0.9
			0.9167
			0.9333
			0.9333
			0.9333
			0.95
			1.0625
			1.075
			1.1
			1.1
			1.1
			1.1167
			1.125
			1.1333
			1.15
			1.15
			1.1667
			1.175
			1.2
			1.225
			1.225
			1.2375
			1.25
			1.3
			1.3125
			1.3333
			1.35
			1.4
			1.4167
			1.4167
			1.4333
			1.4667
			1.4667
			1.47
			1.475
			1.5
			1.5013
			1.525
			1.525
			1.55
			1.5667
			1.5667
			1.575
			1.675
			1.675
			1.6833
			1.7125
			1.875
			1.9167
			1.9667
			2
			2.1167
			2.5
			2.5167
			2.725
			2.75
			3
			3.1
			3.1375
			3.15
			3.3667
