# Supplementary material for: MCAK recognizes the nucleotide-dependent feature at growing microtubule ends
Source: eLife journal article supplement (doi:10.7554/elife.92958), 2023-11-17
Supplement: fig4-data1 [file Figure4_source data 1.xlsx]

## Sheet: Figure.4B
normalized intensity (A.U.)	ATP		AMPPNP		ADP		APO				p value of two-tailed Mann_x0002_Whitney U test with Bonferroni correction
	GTPgS	GDP	GTPgS	GDP	GTPgS	GDP	GTPgS	GDP			GTPgSATP<-> GDPATP:p< 0.001
	0.03518	0.01528	0.84389	0.27414	0.14153	0.15441	63.4132	53.9087			GTPgSAMPPNP<-> GDPAMPPNP:p< 0.001
	0.02685	0.01667	0.73641	0.44402	0.15074	0.15416	58.8247	43.6642			GTPgSADP<-> GDPADP:p=0.0015
	0.04126	0.01892	0.76593	0.44726	0.16561	0.15457	54.2327	42.5038			GTPgSAPO<-> GDPAPO:p< 0.001
	0.02567	0.01808	0.7162	0.32787	0.15333	0.18104	54.1541	40.5391
	0.0354	0.01809	0.83997	0.14614	0.15313	0.1266	53.2884	36.4834
	0.03927	0.01495	0.4717	0.32515	0.13187	0.13442	53.2013	35.8478
	0.03961	0.01576	0.62715	0.18478	0.14637	0.10002	52.351	35.7071
	0.04364	0.00985	0.74759	0.72695	0.12554	0.07039	49.9175	35.018
	0.03931	0.01556	1.36424	0.65432	0.07768	0.06122	49.8917	33.8064
	0.03249	0.01824	1.05675	0.34736	0.08131	0.08491	47.9522	30.8152
	0.03798	0.01403	0.89973	0.48179	0.1087	0.04903	46.0757	30.5329
	0.03709	0.01303	1.29581	0.25073	0.07992	0.11131	43.8033	29.1959
	0.03208	0.01278	0.79198	0.31691	0.07235	0.10025	43.7758	28.1767
	0.02929	0.01011	0.92762	0.24076	0.11209	0.07341	43.7174	28.0839
	0.01809	0.01594	0.91635	0.49813	0.10449	0.11304	43.6972	26.9422
	0.01995	0.01596	0.87385	0.30063	0.12188	0.09544	40.7745	26.35
	0.0184	0.03443	1.05222	0.30344	0.0958	0.10394	39.7276	26.1604
	0.0551	0.03484	0.86544	0.43694	0.11978	0.09074	38.6902	25.5952
	0.06897	0.03225	0.98242	0.24562	0.09513	0.08891	32.7711	25.2623
	0.07004	0.03981	1.01163	0.37699	0.11329	0.10387	31.9488	23.2445
	0.05942	0.02832	0.87663	0.45467	0.10469	0.07804	24.4087	22.7323
	0.07238	0.03025	1.12908	0.2052	0.10904	0.04765	23.1142	21.764
	0.05309	0.03281	0.94088	0.29995	0.07943	0.126	22.8676	21.6123
	0.05829	0.02821	0.88636	0.38348	0.09579	0.12608	20.0366	21.3637
	0.05387	0.03012	1.00026	0.2912	0.11893	0.09896	19.4481	21.2148
	0.03932	0.02905	0.7903	0.39773	0.10857	0.11564	19.4018	19.9216
	0.09202	0.02808	1.28533	0.3372	0.11034	0.08527	18.3406	19.809
	0.05995	0.02167	0.58086	0.32082	0.0813	0.08498	16.2689	19.5603
	0.05535		0.57991	0.29711	0.0887	0.08988	12.762	19.5556
	0.07724		0.71952	0.37315	0.10278	0.09633	94.2331	19.4425
	0.04592		0.72165	0.28654	0.07966	0.10689	71.2107	19.0531
	0.05972		0.76241	0.17976	0.09019	0.10642	69.8363	16.2898
	0.04854		0.7386	0.55856	0.12249	0.12399	64.4927	15.156
	0.06346		0.60612	0.28712	0.1336	0.10643	53.3322	14.0703
	0.04517		0.59932	0.65101	0.10357	0.09303	53.251	12.4631
	0.05252		0.65423	0.41252	0.12112	0.08029	53.1071	11.8458
	0.05765		0.64933	0.57359	0.08844	0.09279	50.6042
	0.06047		0.72947	0.36088	0.09207	0.08571	49.1971
	0.04023		0.63233	0.14478	0.10797	0.10475	48.5129
	0.0623		0.70042	0.30789	0.11329	0.10075	47.4948
	0.05595		0.69458	0.30704	0.12355	0.10106	46.8585
	0.05221		0.52863	0.29949	0.10457	0.07258	40.4813
	0.04998		0.68849	0.55627	0.11463	0.0836	39.3723
	0.06498		0.62409	0.30759	0.11588	0.09744	39.0407
	0.04122		0.48824	0.78543	0.1344		37.8837
	0.03755		0.58968	0.40781	0.12127		37.1628
	0.04225		0.46473	0.46247	0.10655		35.6545
	0.07332		0.83074	0.55262	0.10631		35.3141
	0.05212		0.59238	0.50198	0.14044		32.6399
	0.0598		0.61633	0.30783	0.10549		30.454
	0.04356		0.65128	0.44039	0.10111		27.6384
	0.0447		0.98597	0.14109	0.11733		25.192
	0.0353		0.85715	0.30848	0.12261
	0.041		0.93232	0.48346	0.1266
	0.04374		0.7717	0.53054	0.10618
	0.04831		0.84797	0.50021	0.09296
	0.04642		1.05304		0.10593
	0.05377		0.92874		0.10045
	0.03157		0.78023		0.09007
	0.04515		0.87393		0.14094
	0.04049		0.81549		0.19057
	0.04056		1.34726		0.17503
	0.03937		0.77859		0.14625
	0.03322		1.37495		0.17276
	0.03412		0.69627		0.12573
	0.03691		0.77608		0.13833
	0.04303		1.10814		0.14658
	0.03834		0.67267		0.14833
	0.04611		0.80924		0.14633
	0.0346		0.95099		0.13658
	0.02016		1.29675		0.1487
	0.0303		0.75307		0.17677
	0.02393		0.78727		0.14831
	0.03091		0.869		0.1259
	0.03394		0.69922		0.13459
	0.03312		1.20398		0.14905
	0.03217		1.18371		0.12613
	0.03846		0.99387		0.13088
	0.03894		1.0907		0.1208
	0.05231		1.15999		0.11864
	0.03189		1.22302		0.12151
	0.04057		1.35127		0.12616
	0.05322		1.07242		0.11619
	0.03356		1.02175		0.13681
	0.04272		1.07636		0.15736
	0.03029		1.19452		0.12816
	0.02701		1.22508		0.11722
	0.03483		1.26439		0.10383
	0.03155		1.20872		0.11769
	0.03082		1.10848		0.12212
	0.03784		1.00729		0.16812
	0.04382		1.52689		0.14071
	0.02867		1.06649		0.12684
	0.02597		1.14158		0.12726
	0.03217		1.42675		0.10587
			0.99752		0.1036
			1.0004		0.10546
			0.94304		0.13719
			1.09414		0.12966
			1.10202		0.12725
			1.19856		0.11647
			0.98734		0.09528
			0.99902		0.11726
			1.35334		0.14408
			1.06426		0.11741
			1.36787		0.09522
			1.50225		0.12872
			1.32222		0.12147
			1.36333		0.11712
			1.23949		0.10518
			1.42372		0.09718
			1.72867
			1.47825
			1.35773
			1.19004
			1.2175
			1.77569
			1.25076
			1.37789
			1.60981
			1.23064
			1.07412
			1.31584
			1.17883
			1.22553
			1.52641
			1.09994
			1.05812
			1.22291
			1.10177
			1.12288
			1.07757
			1.36821

## Sheet: Figure.4C
the binding intensity ratio of GFP-MCAK at GTPgS microtubules to GDP microtubules							p value of two-tailed Mann_x0002_Whitney U test with Bonferroni correction
ATP	AMPPNP	ADP	APO				ratioATP<-> 1:p< 0.001
1.94922	3.45634	1.07517	0.994				ratioAMPPNP<-> 1:p< 0.001
1.7869	1.85686	1.07694	1.08409				ratioADP<-> 1:p<0.001
1.731	1.84341	1.07408	1.27066				ratioAPO<-> 1:p< 0.001
1.81131	2.51461	0.91707	1.2722
1.81001	5.64148	1.15462	1.27694
1.94421	2.53567	1.08739	1.30087
1.84418	7.0923	1.4614	1.30529
2.95219	1.80275	1.29585	1.31262
1.7052	2.00287	1.49004	1.35118
1.45505	3.7728	1.07427	1.38155
1.22807	2.37011	1.86067	1.38541
1.32256	4.55421	1.0812	1.46218
1.34862	3.60312	1.20042	1.47322
1.70381	4.86948	1.56125	1.48356
1.04611	2.35356	1.01401	1.50082
1.04428	3.99196	1.16763	1.50664
1.71532	3.95493	1.07214	1.51484
1.69483	2.7466	1.22815	1.52578
1.83122	4.88591	1.25338	1.53207
1.48338	3.18334	1.07293	1.62423
1.89733	1.72588	1.23198	1.72139
1.92208	3.82419	2.01788	1.75191
1.77202	2.61615	1.03603	1.76646
2.06153	2.13497	1.03534	1.87238
1.5461	2.81156	1.31903	1.89332
1.69388	1.86953	1.12883	1.95117
1.83553	2.13182	1.33705	2.03497
2.20889	2.24072	1.34163	2.09036
	2.41947	1.26847	2.26236
	1.92647	1.18361	2.28024
	2.6214	1.06669	2.7335
	4.17853	1.24039	2.87593
	1.92344	1.0646	2.96029
	3.74189	1.2403
	1.6503	1.33898
	2.6044	1.55154
	1.99231	1.34325
	3.16665	1.45417
	7.89301	1.18986
	3.61663	1.23715
	3.62657	1.2333
	3.718	1.45667
	2.00175	1.26465
	3.89492	1.08509
	1.52532
	2.9377
	2.34869
	1.96554
	2.1638
	3.52857
	2.46644
	7.69847
	3.08369
	1.96761
	1.79297
	1.90172
