# Supplementary material for: MCAK recognizes the nucleotide-dependent feature at growing microtubule ends
Source: eLife journal article supplement (doi:10.7554/elife.92958), 2023-11-17
Supplement: fig4-figsupp2-data1 [file supplementary Figure4 source data1.xlsx]

## Sheet: Fig. s4B
GTPS/GDP binding ratio			two-tailed Mann–Whitney U test with Bonferroni correction
0.97263			ratio <-> 1, p<0.001
1.13659
1.28192
1.31761
1.34718
1.48961
1.60505
1.69763
1.72246
1.74592
1.79167
1.85127
1.85376
1.86936
1.96897
2.03529
2.09422
2.10875
2.32815
2.35826
2.63149
2.66704
2.80025
3.03558
3.10142
3.12565
3.22605
3.40267
3.5938
4.06891
4.3653
4.72581
4.73157
4.96606
6.54154
7.0319
