# Supplementary material for: MCAK recognizes the nucleotide-dependent feature at growing microtubule ends
Source: eLife journal article supplement (doi:10.7554/elife.92958), 2023-11-17
Supplement: fig5-data1 [file Figure5_source data 1.xlsx]

## Sheet: Figure.5A-5D
ATP						AMPPNP						ADP						APO
position (mm)	intensity of microtubule (A.U.)	position (mm)	intensity of GFP-MCAK (×106, A.U.)			position (mm)	intensity of microtubule (A.U.)	position (mm)	intensity of GFP-MCAK (×106, A.U.)			position (mm)	intensity of microtubule (A.U.)	position (mm)	intensity of GFP-MCAK (×106, A.U.)			position (mm)	intensity of microtubule (A.U.)	position (mm)	intensity of GFP-MCAK (×106, A.U.)
0	114.417	0	0.00229344			0	38.917	0	0.0594242			0	326.889	0	0.00220686			0	112.533	0	0.508661
0.16	7.439	0.16	0.00203293			0.16	45.981	0.16	0.0646271			0.16	423.053	0.16	0.00316886			0.16	124.582	0.16	0.506781
0.32	7.471	0.32	0.00233942			0.32	51.681	0.32	0.0649851			0.32	389.465	0.32	0.00283827			0.32	128.259	0.32	0.516386
0.48	64.358	0.48	0.00221155			0.48	82.916	0.48	0.0753366			0.48	474.067	0.48	0.0025959			0.48	148.338	0.48	0.531838
0.64	52.282	0.64	0.00226881			0.64	83.935	0.64	0.0755499			0.64	309.247	0.64	0.00333342			0.64	184.519	0.64	0.551033
0.8	47.782	0.8	0.00187488			0.8	122.023	0.8	0.0881086			0.8	240.095	0.8	0.00424359			0.8	232.113	0.8	0.599067
0.96	121.904	0.96	0.00255608			0.96	173.603	0.96	0.112228			0.96	323.448	0.96	0.00526554			0.96	411.385	0.96	0.696485
1.12	93.685	1.12	0.00451906			1.12	331.506	1.12	0.180832			1.12	497.966	1.12	0.00616294			1.12	893.262	1.12	0.985719
1.28	161.895	1.28	0.00635289			1.28	960.609	1.28	0.284343			1.28	665.601	1.28	0.0097487			1.28	1761.11	1.28	1.59809
1.44	637.677	1.44	0.0132492			1.44	1869.98	1.44	0.273778			1.44	971.98	1.44	0.0186163			1.44	2724.3	1.44	2.34543
1.6	1636.43	1.6	0.0224733			1.6	2592.25	1.6	0.185189			1.6	2312.97	1.6	0.0326983			1.6	3286.07	1.6	2.81833
1.76	2286.32	1.76	0.023812			1.76	2562.8	1.76	0.144505			1.76	3216.86	1.76	0.0492081			1.76	2646.35	1.76	3.00885
1.92	2953.55	1.92	0.0162519			1.92	2352.96	1.92	0.144611			1.92	4147.49	1.92	0.0556073			1.92	2287.53	1.92	3.10196
2.08	3100.2	2.08	0.0142496			2.08	2388.85	2.08	0.149297			2.08	3561.87	2.08	0.0538797			2.08	2477.48	2.08	3.18767
2.24	2643.65	2.24	0.0122644			2.24	2819.05	2.24	0.141649			2.24	3557.75	2.24	0.0563013			2.24	2695.35	2.24	3.29491
2.4	2692.25	2.4	0.0122179			2.4	2987.61	2.4	0.112962			2.4	2765.99	2.4	0.0533751			2.4	2568.77	2.4	3.40185
2.56	2160.46	2.56	0.0116397			2.56	2969.66	2.56	0.108904			2.56	2788.72	2.56	0.0519018			2.56	2632.75	2.56	3.7709
2.72	2333.77	2.72	0.0124698			2.72	3123.53	2.72	0.128241			2.72	2617.69	2.72	0.0472977			2.72	3267.81	2.72	4.02971
2.88	1980.96	2.88	0.0117674			2.88	3298.2	2.88	0.145134			2.88	2525.39	2.88	0.0450445			2.88	3761.22	2.88	4.25562
3.04	2211.53	3.04	0.0130014			3.04	3168.37	3.04	0.130901			3.04	3581.92	3.04	0.0479889			3.04	3567.56	3.04	3.88833
3.2	1760.06	3.2	0.012904			3.2	3166.26	3.2	0.118599			3.2	3582.73	3.2	0.0480006			3.2	3708.77	3.2	3.64054
3.36	1711.62	3.36	0.0125641			3.36	3069.74	3.36	0.122233			3.36	4007.01	3.36	0.0506722			3.36	3827.68	3.36	3.40965
3.52	2438.58	3.52	0.0146914			3.52	2618.08	3.52	0.119097			3.52	3757.43	3.52	0.0501148			3.52	3939.95	3.52	3.27864
3.68	2324.12	3.68	0.0136744			3.68	2566.77	3.68	0.147617			3.68	4282.86	3.68	0.0533496			3.68	3787.27	3.68	3.09595
3.84	2630.22	3.84	0.0140177			3.84	2698.51	3.84	0.209026			3.84	3714.37	3.84	0.0532724			3.84	3517.36	3.84	3.33468
4	2434.81	4	0.0142305			4	2509.76	4	0.209495			4	3192.34	4	0.0521253			4	3329.95	4	3.54961
4.16	2046.17	4.16	0.014412			4.16	2464.09	4.16	0.169546			4.16	2588.51	4.16	0.0557709			4.16	3603.28	4.16	3.5904
4.32	1599	4.32	0.0168584			4.32	2824.05	4.32	0.153996			4.32	2715.77	4.32	0.0523616			4.32	3470.66	4.32	3.31976
4.48	1182.86	4.48	0.0216852			4.48	3511.67	4.48	0.125853			4.48	3509.99	4.48	0.0517983			4.48	3087.7	4.48	3.11697
4.64	615.963	4.64	0.0164399			4.64	3827.87	4.64	0.108803			4.64	2937.5	4.64	0.0507697			4.64	2813.05	4.64	3.02389
4.8	208.494	4.8	0.00828646			4.8	4042.61	4.8	0.112002			4.8	3083.84	4.8	0.0489338			4.8	3158.18	4.8	3.18927
4.96	105.389	4.96	0.00526348			4.96	4304.11	4.96	0.13752			4.96	3665.03	4.96	0.0515592			4.96	3281.85	4.96	3.12123
5.12	255.732	5.12	0.00408999			5.12	3584.18	5.12	0.158141			5.12	3301.15	5.12	0.0500983			5.12	3162.38	5.12	2.91098
5.28	210.128	5.28	0.00429135			5.28	2856.28	5.28	0.167305			5.28	3527.19	5.28	0.0539603			5.28	3067.55	5.28	2.86101
5.44	86.11	5.44	0.00406912			5.44	2908.7	5.44	0.131179			5.44	4638.24	5.44	0.053372			5.44	3165.93	5.44	3.23485
5.6	58.53	5.6	0.0033488			5.6	3221.56	5.6	0.141648			5.6	3575.67	5.6	0.0515819			5.6	3022.79	5.6	3.37153
5.76	72.472	5.76	0.00379613			5.76	3210.36	5.76	0.228978			5.76	3307.69	5.76	0.0505275			5.76	2632.96	5.76	3.06019
5.92	139.042	5.92	0.00336824			5.92	1927.39	5.92	0.356536			5.92	3275.13	5.92	0.0489213			5.92	2211.68	5.92	2.68235
6.08	9.137	6.08	0.00340829			6.08	959.837	6.08	0.259028			6.08	3147.98	6.08	0.0521265			6.08	1550.41	6.08	2.22343
6.24	32.361	6.24	0.00366299			6.24	482.458	6.24	0.113605			6.24	3512.25	6.24	0.0521475			6.24	836.488	6.24	1.53087
						6.4	318.209	6.4	0.0615981			6.4	3459.49	6.4	0.0524995			6.4	434.34	6.4	0.952533
						6.56	311.056	6.56	0.0380619			6.56	3483.71	6.56	0.0515639			6.56	269.429	6.56	0.740956
						6.72	333.037	6.72	0.0357062			6.72	2830.73	6.72	0.0480185			6.72	243.402	6.72	0.64993
						6.88	285.669	6.88	0.0317956			6.88	3561.17	6.88	0.0494124			6.88	204.449	6.88	0.604997
						7.04	220.438	7.04	0.0340765			7.04	2785.58	7.04	0.0471374			7.04	209.548	7.04	0.567171
						7.2	186.139	7.2	0.0286475			7.2	2496.18	7.2	0.0433589			7.2	156.09	7.2	0.551277
												7.36	2254.67	7.36	0.040034			7.36	105.558	7.36	0.531332
												7.52	2782.28	7.52	0.0383083
												7.68	3105.31	7.68	0.0378683
												7.84	2755.17	7.84	0.0354436
												8	2183.69	8	0.033288
												8.16	1345.92	8.16	0.0244392
												8.32	710.988	8.32	0.0130265
												8.48	246.127	8.48	0.00504526
												8.64	234.672	8.64	0.00301064
												8.8	93.008	8.8	0.00173653
												8.96	58.161	8.96	0.000698781

## Sheet: Figure.5E
normalized binding intensity of GFP-MCAK (A.U.)	ATP			AMPPNP			ADP			APO				two-tailed paired t-test by Bonferroni correction
	end	lattice		end	lattice		end	lattice		end	lattice			endATP<-> latticeATP:p< 0.001
	0.02963	0.01862		0.61445	0.50925		0.06396	0.07689		16.9954	18.7753			endAMPPNP<-> latticeAMPPNP:p< 0.001
	0.02876	0.01785		0.55579	0.45763		0.0635	0.06991		15.4495	17.6485			endADP<-> latticeADP:p< 0.001
	0.02695	0.01491		0.51935	0.42944		0.06149	0.06188		15.006	17.1443			endAPO<-> latticeAPO:p< 0.001
	0.0253	0.01484		0.51928	0.42321		0.05706	0.06177		14.9737	16.9118
	0.02489	0.01482		0.51901	0.41176		0.05616	0.06152		14.837	15.5842
	0.02439	0.01445		0.51605	0.39199		0.0558	0.061		14.8081	15.4789
	0.02373	0.01442		0.50785	0.37418		0.05512	0.06094		14.6935	15.4617
	0.02202	0.01353		0.50008	0.36573		0.05415	0.06001		13.3601	15.4221
	0.02109	0.01352		0.49845	0.36138		0.0531	0.05977		12.8206	15.3468
	0.02054	0.01347		0.49436	0.35321		0.05245	0.05858		12.779	15.0524
	0.02034	0.01269		0.48708	0.34765		0.0517	0.05757		12.7156	14.5941
	0.02033	0.01268		0.46286	0.34712		0.05132	0.05691		12.6218	14.1409
	0.01999	0.01261		0.45926	0.34396		0.05127	0.05566		12.1222	14.0334
	0.01979	0.01255		0.45137	0.34076		0.051	0.05493		11.6605	13.5562
	0.01869	0.01241		0.44803	0.33694		0.04999	0.05425		11.5553	13.0696
	0.0184	0.01225		0.43565	0.32396		0.0498	0.05424		11.4041	12.7769
	0.01828	0.01188		0.43289	0.32122		0.04946	0.05331		10.5858	12.7583
	0.018	0.01185		0.43162	0.32073		0.04911	0.05307		10.5783	12.7425
	0.01784	0.01185		0.42224	0.32073		0.04717	0.05119		10.2882	11.6913
	0.01766	0.01183		0.41422	0.31752		0.04685	0.05051		10.0759	11.3685
	0.01735	0.01154		0.4109	0.31662		0.04658	0.05045		9.92576	11.3624
	0.01733	0.01146		0.40706	0.31537		0.04646	0.05033		9.89489	11.252
	0.01717	0.01138		0.40671	0.31326		0.04645	0.05031		9.89458	11.0746
	0.01644	0.01087		0.40386	0.3108		0.04645	0.05031		9.8128	10.8702
	0.01623	0.01077		0.38954	0.30907		0.04526	0.04944		9.68678	10.6349
	0.01615	0.01063		0.3886	0.30141		0.04429	0.04941		9.33311	10.5044
	0.0161	0.01041		0.38237	0.29787		0.04386	0.04917		9.19395	10.424
	0.01551	0.01034		0.3781	0.2952		0.04368	0.04886		8.87407	10.3105
	0.01531	0.01028		0.37681	0.29474		0.04343	0.04867		8.72594	10.2559
	0.01507	0.00989		0.37583	0.29248		0.04332	0.04783		8.47287	10.1883
	0.01493	0.00979		0.37182	0.28771		0.04173	0.0468		8.18502	10.1591
	0.01373	0.00962		0.36948	0.28612		0.0409	0.0466		8.0279	10.1265
	0.01291	0.00957		0.36724	0.28032		0.04065	0.04654		7.98133	9.32067
	0.01264	0.00842		0.36717	0.27734		0.04044	0.04609		7.59468	9.21298
	0.01255	0.00825		0.36216	0.26347		0.03974	0.04576		7.14516	8.67441
	0.01239	0.00765		0.36075	0.26255		0.03903	0.04555		7.10474	8.56282
	0.01237	0.00762		0.34875	0.26093		0.03852	0.04521		7.07671	8.51339
	0.01161	0.0073		0.34259	0.25335		0.03805	0.04477		6.6446	8.47372
	0.0116	0.00665		0.333	0.25155		0.03679	0.04462		6.51931	8.4293
	0.00878	0.00521		0.33288	0.24528		0.03541	0.04417		6.39269	8.20685
				0.31048	0.2432		0.03465	0.03972		6.35264	8.19921
				0.30983	0.22868		0.03251	0.03955		6.1055	8.10976
				0.30506	0.22249		0.03078	0.03593		5.84792	7.86051
				0.29884	0.21728		0.03069	0.03586		5.69033	7.29795
				0.28278	0.19826		0.03051	0.03579		5.65632	6.84137
				0.21909	0.19627					5.63212	6.58771
				0.199	0.17408					5.1695	6.2869
										4.55655	6.09892
										4.4333	5.50889
										4.10596	5.47798
										3.31772	2.8049
										2.17214	2.77599

## Sheet: Figure.5F
the end-to-lattice binding intensity ratio	ATP	AMPPNP	ADP	APO			two-tailed Mann-Whitney U testt by Bonferroni correction
	1.04265	1.82667	1.00599	1.26198			ratioATP<-> 1:p< 0.001
	1.12148	1.80358	0.99629	1.19515			ratioAMPPNP<-> 1:p< 0.001
	1.15165	1.76293	0.9937	1.13966			ratioADP<-> 1:p<0.001
	1.20266	1.75969	0.98242	1.13652			ratioAPO<-> 1:p< 0.001
	1.20302	1.72304	0.97605	1.12028
	1.27291	1.64029	0.9543	1.11518
	1.28785	1.63104	0.95297	1.10202
	1.36624	1.61275	0.95076	1.07233
	1.36913	1.6055	0.94271	1.06161
	1.37127	1.57863	0.93414	1.04462
	1.40291	1.54428	0.93213	0.99477
	1.44708	1.45568	0.93208	0.98897
	1.44951	1.44905	0.92983	0.9704
	1.50981	1.43618	0.92449	0.95588
	1.51849	1.40732	0.92371	0.9502
	1.52582	1.39477	0.92151	0.92743
	1.5315	1.39071	0.92123	0.91967
	1.54495	1.37895	0.92055	0.89535
	1.55908	1.36733	0.91493	0.89244
	1.5597	1.33523	0.91294	0.87047
	1.55974	1.33183	0.90642	0.86883
	1.56604	1.32416	0.9045	0.86542
	1.5775	1.30148	0.88707	0.86362
	1.59271	1.29407	0.88006	0.86312
	1.59958	1.27665	0.87897	0.86089
	1.61182	1.2681	0.87878	0.84632
	1.62462	1.26391	0.87049	0.8448
	1.62485	1.23266	0.86976	0.84286
	1.63269	1.22701	0.86864	0.83091
	1.63919	1.21236	0.86835	0.82244
	1.68729	1.20659	0.86822	0.82239
	1.74406	1.20411	0.86326	0.81582
	1.77283	1.1915	0.85871	0.80739
	1.79725	1.17899	0.85769	0.80475
	2.05541	1.15706	0.85742	0.79924
	2.13837	1.14314	0.85295	0.79178
	2.14275	1.14051	0.85268	0.78414
	2.1728	1.13422	0.84919	0.78276
	2.2319	1.12842	0.8455	0.77685
	2.40867	1.08026	0.83159	0.77441
		1.07066	0.8259	0.74954
		1.06403	0.80776	0.74859
		1.03866	0.78449	0.72409
		0.99137	0.77813	0.72391
		0.98693	0.7681	0.69449
		0.9847		0.66805
		0.92862		0.66765
				0.63049
				0.62558
				0.58867
				0.56718
				0.53522
