# Supplementary material for: MCAK recognizes the nucleotide-dependent feature at growing microtubule ends
Source: eLife journal article supplement (doi:10.7554/elife.92958), 2023-11-17
Supplement: fig5-figsupp1-data1 [file supplementary Figure5 source data1.xlsx]

## Sheet: Fig. s5A
GFP-MCAK			microtubule
position (nm)	intensity (×106, A.U.)		position (nm)	intensity ( A.U.)
0	0.000920535		0	49.2379
0.16	0.00218306		0.16	105.877
0.32	0.00275762		0.32	175.874
0.48	0.00384623		0.48	216.86
0.64	0.00632417		0.64	385.421
0.8	0.0148293		0.8	1000.35
0.96	0.0270328		0.96	2589.55
1.12	0.0301376		1.12	3295.97
1.28	0.0257038		1.28	2787.02
1.44	0.0216419		1.44	3200.25
1.6	0.0200459		1.6	3873.74
1.76	0.0201796		1.76	4338.78
1.92	0.0210409		1.92	3782.01
2.08	0.0211735		2.08	3037.79
2.24	0.0217843		2.24	2925.93
2.4	0.0247829		2.4	3454.92
2.56	0.0259126		2.56	4418.96
2.72	0.0248382		2.72	3960.79
2.88	0.0219455		2.88	3432.96
3.04	0.020105		3.04	3744.46
3.2	0.0217456		3.2	3367.02
3.36	0.0211336		3.36	3452.51
3.52	0.0193732		3.52	3472.18
3.68	0.0186676		3.68	3429.18
3.84	0.0178763		3.84	3360.29
4	0.0187398		4	4287.69
4.16	0.0186134		4.16	3448.86
4.32	0.0178381		4.32	3892.18
4.48	0.0186359		4.48	4337.99
4.64	0.0201044		4.64	3830.7
4.8	0.0217019		4.8	3498.44
4.96	0.0212098		4.96	2960.78
5.12	0.0199195		5.12	3198.41
5.28	0.0211437		5.28	3940.68
5.44	0.0230718		5.44	3631.93
5.6	0.0219048		5.6	2825.14
5.76	0.022726		5.76	2754.53
5.92	0.0241159		5.92	3325.6
6.08	0.0253449		6.08	3337.34
6.24	0.026763		6.24	3065.33
6.4	0.0247326		6.4	2891.63
6.56	0.025509		6.56	3379.41
6.72	0.0238942		6.72	3285.15
6.88	0.0204153		6.88	2607.1
7.04	0.0208792		7.04	2433.24
7.2	0.0213295		7.2	2583.52
7.36	0.0176777		7.36	2534.31
7.52	0.017632		7.52	1901.85
7.68	0.0248887		7.68	986.486
7.84	0.0297496		7.84	476.284
8	0.0211135		8	231.905
8.16	0.0093112		8.16	110.625
8.32	0.00448581		8.32	124.881
8.48	0.00325279		8.48	44.2336
8.64	0.00283259		8.64	193.556

## Sheet: Fig. s5B
normalized intensity (A.U.)				two-tailed pair t-test by Bonferroni correction
end	lattice			end <-> lattice, p=0.086
0.41982	0.35967
0.36765	0.35967
0.79728	0.55116
0.75432	0.62481
0.90715	0.69478
0.70153	0.71565
0.7046	0.71565
0.61622	0.7267
1.03788	0.7267
0.57387	0.73897
0.87216	0.75616
0.78808	0.75616
0.79483	0.76046
0.92249	0.7801
0.68926	0.7801
0.87278	0.78378
0.81508	0.78378
0.97221	0.79176
0.71995	0.79176
0.77028	0.80158
1.00842	0.87032
1.14406	0.96791
1.26374	0.96791
1.0833	1.16309
1.40061	1.24165
1.30671	1.2484
1.35213	1.2484
1.99351	1.39386
1.63998	1.42332
1.62034	1.49391
1.70075	1.49391
1.48347	1.63998
1.8726	1.69645
1.88058	2.07576
2.2071	2.07576

## Sheet: Fig. s5C
end/lattice ratio			two-tailed Mann-Whitney U test with Bonferroni correction
1.44686			ratio <-> 1, p=0.035
1.43048
1.42755
1.30567
1.30561
1.2281
1.20739
1.18296
1.18188
1.16675
1.15909
1.15331
1.1519
1.13832
1.1279
1.11357
1.10369
1.08464
1.08293
1.06316
1.04674
1.04593
1.04159
1.04
1.02238
0.98415
0.98013
0.96103
0.93145
0.90944
0.90608
0.90441
0.88359
0.84801
0.7765
