# Supplementary material for: MCAK recognizes the nucleotide-dependent feature at growing microtubule ends
Source: eLife journal article supplement (doi:10.7554/elife.92958), 2023-11-17
Supplement: fig6-data1 [file Figure6_source data 1.xlsx]

## Sheet: Figure.6C
kon (×10-6, s-1 nM-1tubulin dimer-1)			two-tailed Mann_x0002_Whitney U test with Bonferroni correction
K524A	V298S		K524A<-> wild-type:p< 0.001
0	0.65873		V298S<-> wild-type:p< 0.001
0	4.07
0	1.628
1.89934	1.89934
0	0.814
3.79867	0.67833
0	0
1.89934	0
0	0
0	0.79692
0	2.53245
0	0
0	0
0	0
1.89934	0.71225
1.89934	1.89934
0	1.89934
0	1.89934
0	2.53245
1.89934	2.2792
0	0
0.37987	1.3024
3.06619	0.814
1.89934
0
0
3.79867
2.442
0
0
0
0
0
0

## Sheet: Figure.6D
dwell time (s)			two-tailed Mann_x0002_Whitney U test with Bonferroni correction
K524A	V298S		K524A<-> wild-type:p< 0.001
0.2667	0.2333		V298S<-> wild-type:p< 0.001
0.3333	0.2375
0.2667	0.2417
0.4	0.25
0.25	0.25
0.3	0.25
0.225	0.2667
0.225	0.275
0.2	0.2833
0.4333	0.2833
0.35	0.2875
0.25	0.3167
0.2667	0.325
0.3333	0.3312
0.2667	0.3333
0.25	0.35
0.425	0.35
0.7	0.35
	0.35
	0.35
	0.3583
	0.4
	0.4
	0.4
	0.4167
	0.4281
	0.4333
	0.45
	0.45
	0.475
	0.4833
	0.5
	0.5
	0.5333
	0.575
	0.7167
	0.75
	0.8
	0.85

## Sheet: Figure.6F
normalized intensity (A.U.)	K524A		V298S			two-tailed Mann_x0002_Whitney U test with Bonferroni correction
	GTPgS	GDP	GTPgS	GDP		K524AGTPgS<-> K524AGDP:p< 0.001
	0.12876	0.04495	0.08753	0.02965		V298SGTPgS<-> V298SGDP:p< 0.001
	0.1055	0.06483	0.06395	0.02628
	0.1194	0.038	0.06078	0.02418
	0.09808	0.06352	0.05274	0.03264
	0.10564	0.05741	0.06357	0.02146
	0.16431	0.05534	0.04994	0.0245
	0.08512	0.05104	0.04139	0.02481
	0.09608	0.06044	0.03927	0.026
	0.0739	0.04418	0.03604	0.02651
	0.07196	0.046	0.04974	0.02817
	0.08243	0.03552	0.02694	0.02563
	0.09738	0.03873	0.0397	0.02451
	0.10831	0.05663	0.0325	0.02637
	0.07166	0.05956	0.04715	0.02456
	0.08799	0.03015	0.04569	0.02958
	0.10224	0.05327	0.05866	0.0283
	0.07021	0.0553	0.04248	0.02107
	0.0735	0.05264	0.03982	0.03484
	0.07368	0.06463	0.05094	0.01876
	0.09944	0.04268	0.04809	0.02752
	0.08076	0.07404	0.03663	0.02454
	0.09211	0.03361	0.03806	0.02393
	0.10315	0.04525	0.04636	0.02624
	0.09368	0.06222	0.04968	0.02542
	0.08147	0.04517	0.04353	0.0163
	0.10017	0.04031	0.04398	0.02377
	0.09752	0.05911	0.03706	0.02608
	0.10536	0.08481	0.03524	0.0227
	0.10452	0.0507	0.03477	0.02859
	0.08797	0.04127	0.03726	0.02999
	0.11313	0.03397	0.04265	0.02797
	0.11632	0.05893	0.04485	0.02735
	0.07405	0.11208	0.0397	0.02886
	0.07322	0.04752	0.04679	0.01977
	0.08129	0.10074	0.04262	0.03223
	0.1077	0.04918	0.0331	0.02251
	0.06502	0.0436	0.04862	0.02631
	0.11036	0.05928	0.04618	0.03426
	0.10989	0.05852	0.03729	0.02515
	0.10491	0.0451	0.03662	0.02709
	0.07623	0.05345	0.03697	0.02741
	0.07631	0.04128	0.03156	0.03026
	0.09211	0.06087	0.03779	0.02508
	0.11486	0.05588	0.0288	0.02208
	0.07287	0.0812	0.04216	0.02452
	0.07882	0.08474	0.0327	0.02303
	0.07233	0.05434	0.04574	0.02761
	0.09236	0.03981	0.04642	0.03032
	0.14344	0.05121	0.02296	0.03449
	0.10737	0.04848	0.02739	0.02861
	0.14116	0.0484	0.03841	0.03192
	0.14862	0.02898	0.02635	0.02989
	0.10766	0.04445	0.02381	0.0274
	0.11044	0.04376	0.032	0.03059
	0.12297	0.04198	0.02102	0.02687
	0.11174	0.05473	0.02284	0.0224
	0.14353	0.0598	0.03787	0.03009
	0.09517	0.02821	0.0248	0.02636
	0.07822	0.04972	0.02762	0.0222
	0.11127	0.03828	0.02348
	0.0823	0.03762	0.02566
	0.10078	0.05698	0.02692
	0.10007		0.0202
	0.09766		0.02525
	0.10585		0.0226
	0.08464		0.08257
	0.08563		0.06409
	0.07122		0.07765
	0.05557		0.06041
	0.07771		0.05138
	0.07641		0.04501
	0.08465		0.04444
	0.11852		0.05545
	0.11736		0.04459
	0.13006		0.04357
	0.08913		0.04651
	0.10969		0.0463
	0.1138		0.0414
	0.12337		0.05715
	0.1042		0.04458
	0.09741		0.04129
	0.10774		0.05331
	0.10432		0.03693
	0.11181		0.05836
	0.086		0.04694
	0.10357		0.04117
	0.11482		0.03045
	0.10404		0.03465
	0.10021		0.04704
	0.10528		0.05294
	0.08574		0.02568
	0.09641		0.02757
	0.0797		0.02946
	0.08505		0.02658
	0.0964		0.02524
	0.08822		0.03278
	0.09561		0.02857
	0.10527		0.02485
	0.08316		0.02417
	0.08925		0.02129
	0.08594		0.02665
	0.10488		0.02638
	0.11497		0.02153
	0.14534		0.02864
	0.06604		0.02992
	0.12465		0.0278
	0.07243		0.02569
	0.09489		0.02696
	0.068		0.03492
	0.068		0.0331
	0.07325		0.03833
	0.06628		0.03384
	0.08728		0.02656
	0.06484		0.0265
	0.10556		0.03621
	0.11799		0.02721
	0.14544		0.01993
	0.19156		0.02713
	0.1503		0.02523
	0.1555		0.0287
	0.11184		0.02778
	0.12946		0.02312
	0.16419		0.02608
	0.17259		0.02563
	0.11976
	0.12647
	0.09514
	0.12664
	0.11874
	0.12335
	0.14024
	0.12137
	0.10814
	0.12607

## Sheet: Figure.6G
GTPgS/GDP ratio			two-tailed Mann_x0002_Whitney U test with Bonferroni correction
K524A	V298S		K524A<-> wild-type:p< 0.001
2.26971	1.28869		V298S<-> wild-type:p< 0.001
1.57373	1.45379
2.68522	1.58035
1.60613	1.17062
1.77722	1.78008
1.84373	1.55953
1.99881	1.53968
1.68813	1.46947
2.30919	1.44098
2.21773	1.35608
2.87274	1.49069
2.6341	1.55868
1.80156	1.44866
1.71293	1.55582
3.38378	1.2916
1.91543	1.3502
1.845	1.81294
1.93825	1.09644
1.57851	2.03651
2.39051	1.38843
1.37806	1.55695
3.03537	1.59639
2.25466	1.4562
1.63978	1.5029
2.25876	2.34345
2.53115	1.60707
1.72604	1.46472
1.20293	1.6828
2.01243	1.33643
2.47231	1.27378
3.00315	1.36587
1.73129	1.39668
0.9103	1.32371
2.1469	1.93267
1.01275	1.18538
2.07448	1.69692
2.33984	1.4523
1.72111	1.11513
1.74338	1.51921
2.26234	1.4103
1.90874	1.39374
2.47141	1.26265
1.67614	1.52303
1.8259	1.73055
1.25641	1.55788
1.20397	1.65872
1.87741	1.38362
2.56258	1.26026
1.99248	1.10761
2.10461	1.33549
2.10811	1.19672
3.52006	1.27814
2.29536	1.39439
2.33152	1.24875
2.43052	1.42184
1.86416	1.70555
1.7062	1.26957
3.61654	1.4494
2.05203	1.72068
2.66501
2.71205
1.7907
