# Supplementary material for: MCAK recognizes the nucleotide-dependent feature at growing microtubule ends
Source: eLife journal article supplement (doi:10.7554/elife.92958), 2023-11-17
Supplement: fig6-figsupp1-data1 [file supplementary Figure6 source data1.xlsx]

## Sheet: Fig. s6B
depolymerization rate (mm/min)				two-tailed Mann-Whitney U test with Bonferroni correction
GFP-MCAK	GFP-MCAKK524A	GFP-MCAKV298S		WT <-> K524A, p< 0.001
1.10635	0.12834	0.05962		WT <-> V298S, p<0.001
1.45189	0.15484	0.04228
1.20743	0.03352	0.04509
0.88906	0.05806	0.05699
1.77145	0.08604	0.03674
1.31427	0.06258	0.08586
1.71429	0.06483	0.02017
1.25456	0.03754	0.04118
1.94167	0.03603	0.04799
0.98819	0.0847	0.07835
0.94092	0.07665	0.05901
0.79615		0.05161
1.51818		0.03127
1.51999		0.07095
0.67985		0.05819
1.09823		0.03737
1.15109		0.08798
0.50791		0.06918
0.64168		0.04107
0.70286		0.03268
1.34999		0.11574
		0.04216
		0.07493
		0.04444
		0.04138
		0.05304
		0.05423
		0.03529
		0.04629
		0.08257
		0.08239
		0.02308
		0.06038
		0.03214
		0.11781
		0.03478
		0.05936
		0.0766
		0.05869
		0.06451
		0.07529
		0.02243
		0.05379
		0.09842
		0.02875
		0.04258
		0.04941
		0.025
		0.04643
		0.05218
		0.04676
		0.05263

## Sheet: Fig. s6C
relative ATPase activity					two-tailed Student’s t test
GFP-MCAK	GFP-MCAKK524A	GFP-MCAKV298S			WT <-> K524A, p< 0.001
0.8463	0.29768	0.37937			WT <-> V298S, p<0.001
0.98637	0.40273	0.48442
1.05643	0.39105	0.44943
0.91636	0.35602	0.46111
0.99805
1.1965
