# Supplementary material for: MCAK recognizes the nucleotide-dependent feature at growing microtubule ends
Source: eLife journal article supplement (doi:10.7554/elife.92958), 2023-11-17
Supplement: fig7-data1 [file Figure7_source data 1.xlsx]

## Sheet: Figure.7B
	probability distribution							gamma function fit
lifetime (s)	control	20 nM MCAK	50 nM XMAP215	20 nM MCAK+50 nM XMAP215		lifetime (s)	control	20 nM MCAK	50 nM XMAP215	20 nM MCAK+50 nM XMAP215
50	0.19639	0.33977	0.15612	0.33216		0	0	0	0	0
150	0.21445	0.29308	0.35021	0.35689		1	0.01948	0.02472	0.00628	0.01008
250	0.18059	0.15781	0.18143	0.17668		2	0.0301	0.04204	0.01226	0.02102
350	0.11287	0.10628	0.08861	0.0742		3	0.03874	0.05716	0.01808	0.03216
450	0.08126	0.05153	0.08439	0.02473		4	0.04628	0.07088	0.02376	0.0433
550	0.07901	0.02415	0.05063	0.0212		5	0.05306	0.08358	0.02932	0.0544
650	0.03612	0.01288	0.05063	0.01413		6	0.05928	0.09548	0.03478	0.06542
750	0.02709	0.00644	0.01688	0		7	0.06504	0.1067	0.04014	0.0763
850	0.02935	0.00161	0.01266	0		8	0.07044	0.11734	0.04538	0.08704
950	0.00903	0	0.00844	0		9	0.07554	0.12746	0.05054	0.09762
1050	0.00677	0.00483	0	0		10	0.08036	0.13712	0.05558	0.10804
1150	0.02709	0.00161	0	0		11	0.08494	0.14636	0.06056	0.11826
1250	0	0	0	0		12	0.08932	0.15522	0.06544	0.12832
						13	0.09352	0.16374	0.07022	0.13818
						14	0.09752	0.1719	0.07494	0.14786
						15	0.10138	0.17978	0.07956	0.15734
						16	0.1051	0.18734	0.0841	0.16662
						17	0.10868	0.19464	0.08858	0.17572
						18	0.11212	0.20168	0.09296	0.1846
						19	0.11546	0.20846	0.09728	0.19332
						20	0.11868	0.215	0.1015	0.20182
						21	0.1218	0.22134	0.10566	0.21014
						22	0.12482	0.22744	0.10976	0.21826
						23	0.12776	0.23334	0.11378	0.2262
						24	0.1306	0.23904	0.11772	0.23394
						25	0.13334	0.24454	0.1216	0.2415
						26	0.13602	0.24986	0.1254	0.24886
						27	0.13862	0.255	0.12914	0.25606
						28	0.14114	0.25998	0.1328	0.26306
						29	0.1436	0.26478	0.13642	0.26988
						30	0.14598	0.26942	0.13996	0.27654
						31	0.1483	0.2739	0.14344	0.283
						32	0.15056	0.27824	0.14686	0.2893
						33	0.15276	0.28242	0.1502	0.29544
						34	0.1549	0.28648	0.1535	0.3014
						35	0.157	0.29038	0.15672	0.30718
						36	0.15902	0.29416	0.1599	0.31282
						37	0.161	0.2978	0.16302	0.31828
						38	0.16292	0.30132	0.16606	0.3236
						39	0.1648	0.3047	0.16906	0.32874
						40	0.16662	0.30798	0.172	0.33374
						41	0.1684	0.31114	0.1749	0.33858
						42	0.17014	0.31418	0.17772	0.34328
						43	0.17184	0.31712	0.1805	0.34782
						44	0.17348	0.31994	0.18322	0.35222
						45	0.1751	0.32266	0.1859	0.35648
						46	0.17666	0.32528	0.18852	0.3606
						47	0.17818	0.3278	0.19108	0.36458
						48	0.17968	0.33022	0.1936	0.36844
						49	0.18112	0.33256	0.19608	0.37214
						50	0.18254	0.3348	0.1985	0.37572
						51	0.18392	0.33694	0.20086	0.37918
						52	0.18526	0.339	0.20318	0.3825
						53	0.18658	0.34096	0.20546	0.3857
						54	0.18786	0.34286	0.20768	0.38878
						55	0.1891	0.34466	0.20986	0.39174
						56	0.1903	0.3464	0.212	0.39456
						57	0.1915	0.34804	0.21408	0.3973
						58	0.19264	0.34962	0.21614	0.3999
						59	0.19376	0.35112	0.21814	0.4024
						60	0.19486	0.35254	0.2201	0.40478
						61	0.19592	0.3539	0.22202	0.40706
						62	0.19696	0.35518	0.22388	0.40924
						63	0.19796	0.3564	0.22572	0.4113
						64	0.19894	0.35756	0.22752	0.41328
						65	0.1999	0.35864	0.22926	0.41514
						66	0.20084	0.35966	0.23098	0.41692
						67	0.20174	0.36062	0.23264	0.41858
						68	0.20262	0.36154	0.23428	0.42016
						69	0.20348	0.36238	0.23588	0.42166
						70	0.20432	0.36316	0.23744	0.42306
						71	0.20512	0.3639	0.23896	0.42436
						72	0.2059	0.36458	0.24044	0.42558
						73	0.20668	0.3652	0.24188	0.42672
						74	0.20742	0.36576	0.2433	0.42778
						75	0.20814	0.36628	0.24466	0.42874
						76	0.20884	0.36676	0.246	0.42964
						77	0.20952	0.36718	0.24732	0.43044
						78	0.21018	0.36754	0.24858	0.43118
						79	0.21082	0.36786	0.24982	0.43184
						80	0.21144	0.36814	0.25104	0.43242
						81	0.21204	0.36838	0.2522	0.43294
						82	0.21262	0.36858	0.25334	0.43338
						83	0.21318	0.36872	0.25446	0.43376
						84	0.21372	0.36882	0.25552	0.43406
						85	0.21426	0.3689	0.25658	0.43432
						86	0.21476	0.36892	0.2576	0.43448
						87	0.21526	0.3689	0.25858	0.4346
						88	0.21574	0.36886	0.25954	0.43466
						89	0.2162	0.36876	0.26046	0.43464
						90	0.21664	0.36864	0.26136	0.43458
						91	0.21706	0.36848	0.26222	0.43446
						92	0.21746	0.36828	0.26306	0.43426
						93	0.21786	0.36806	0.26388	0.43404
						94	0.21824	0.3678	0.26466	0.43374
						95	0.2186	0.3675	0.26542	0.4334
						96	0.21896	0.36718	0.26616	0.433
						97	0.2193	0.36682	0.26686	0.43256
						98	0.21962	0.36644	0.26754	0.43206
						99	0.21992	0.36602	0.2682	0.43152
						100	0.22022	0.36558	0.26882	0.43092
						101	0.22048	0.36512	0.26942	0.4303
						102	0.22076	0.36462	0.27	0.42962
						103	0.221	0.36408	0.27056	0.42888
						104	0.22124	0.36354	0.2711	0.42812
						105	0.22148	0.36296	0.2716	0.42732
						106	0.22168	0.36236	0.2721	0.42648
						107	0.22188	0.36174	0.27256	0.42558
						108	0.22208	0.36108	0.273	0.42466
						109	0.22226	0.36042	0.27342	0.4237
						110	0.22242	0.35972	0.2738	0.4227
						111	0.22258	0.359	0.27418	0.42168
						112	0.22272	0.35826	0.27454	0.4206
						113	0.22286	0.3575	0.27486	0.4195
						114	0.22298	0.35674	0.27518	0.41838
						115	0.22308	0.35594	0.27546	0.41722
						116	0.22318	0.35512	0.27574	0.41602
						117	0.22328	0.35428	0.276	0.4148
						118	0.22334	0.35342	0.27622	0.41354
						119	0.22342	0.35256	0.27644	0.41226
						120	0.22348	0.35166	0.27664	0.41094
						121	0.22352	0.35076	0.2768	0.40962
						122	0.22356	0.34984	0.27696	0.40826
						123	0.2236	0.3489	0.2771	0.40686
						124	0.22362	0.34796	0.27722	0.40546
						125	0.22362	0.34698	0.27732	0.40402
						126	0.22362	0.346	0.27742	0.40256
						127	0.22362	0.345	0.27748	0.4011
						128	0.2236	0.344	0.27754	0.3996
						129	0.22358	0.34298	0.27756	0.39808
						130	0.22354	0.34194	0.27758	0.39654
						131	0.2235	0.34088	0.2776	0.39498
						132	0.22344	0.33982	0.27758	0.3934
						133	0.22338	0.33876	0.27756	0.3918
						134	0.22332	0.33766	0.2775	0.39018
						135	0.22324	0.33658	0.27746	0.38856
						136	0.22316	0.33546	0.27738	0.38692
						137	0.22308	0.33434	0.27728	0.38526
						138	0.22298	0.33322	0.27718	0.38358
						139	0.22288	0.33208	0.27708	0.38188
						140	0.22276	0.33094	0.27694	0.38018
						141	0.22264	0.32978	0.2768	0.37846
						142	0.22252	0.32862	0.27664	0.37674
						143	0.22238	0.32744	0.27646	0.375
						144	0.22224	0.32626	0.27628	0.37324
						145	0.2221	0.32508	0.27608	0.37148
						146	0.22194	0.32388	0.27588	0.3697
						147	0.22178	0.32268	0.27566	0.36792
						148	0.22162	0.32146	0.27542	0.36612
						149	0.22144	0.32024	0.27518	0.36432
						150	0.22128	0.31902	0.27492	0.3625
						151	0.22108	0.31778	0.27464	0.36068
						152	0.2209	0.31656	0.27436	0.35886
						153	0.2207	0.3153	0.27408	0.35702
						154	0.2205	0.31406	0.27376	0.35518
						155	0.22028	0.3128	0.27346	0.35332
						156	0.22008	0.31154	0.27312	0.35146
						157	0.21986	0.31028	0.2728	0.3496
						158	0.21964	0.30902	0.27244	0.34774
						159	0.2194	0.30774	0.27208	0.34586
						160	0.21916	0.30646	0.27172	0.34398
						161	0.21892	0.30518	0.27134	0.3421
						162	0.21868	0.3039	0.27096	0.34022
						163	0.21842	0.3026	0.27056	0.33834
						164	0.21818	0.30132	0.27016	0.33644
						165	0.21792	0.30002	0.26974	0.33454
						166	0.21764	0.29872	0.26932	0.33266
						167	0.21738	0.29742	0.2689	0.33076
						168	0.2171	0.29612	0.26844	0.32886
						169	0.21682	0.29482	0.268	0.32694
						170	0.21654	0.2935	0.26754	0.32504
						171	0.21626	0.2922	0.26708	0.32314
						172	0.21596	0.29088	0.2666	0.32124
						173	0.21566	0.28956	0.26612	0.31934
						174	0.21536	0.28826	0.26564	0.31742
						175	0.21506	0.28694	0.26514	0.31552
						176	0.21476	0.28562	0.26462	0.31362
						177	0.21444	0.2843	0.26412	0.3117
						178	0.21412	0.28298	0.2636	0.3098
						179	0.2138	0.28166	0.26306	0.3079
						180	0.21348	0.28034	0.26254	0.306
						181	0.21314	0.27902	0.262	0.3041
						182	0.21282	0.2777	0.26144	0.3022
						183	0.21248	0.27636	0.2609	0.3003
						184	0.21214	0.27504	0.26034	0.29842
						185	0.2118	0.27372	0.25976	0.29652
						186	0.21146	0.2724	0.2592	0.29464
						187	0.2111	0.27108	0.25862	0.29276
						188	0.21076	0.26976	0.25804	0.29088
						189	0.2104	0.26844	0.25744	0.289
						190	0.21004	0.26712	0.25684	0.28712
						191	0.20968	0.2658	0.25624	0.28524
						192	0.20932	0.26448	0.25564	0.28338
						193	0.20896	0.26316	0.25502	0.28152
						194	0.20858	0.26184	0.2544	0.27966
						195	0.2082	0.26052	0.25378	0.2778
						196	0.20784	0.2592	0.25316	0.27594
						197	0.20746	0.2579	0.25252	0.2741
						198	0.20708	0.25658	0.25188	0.27226
						199	0.20668	0.25528	0.25124	0.27042
						200	0.2063	0.25396	0.2506	0.2686
						201	0.20592	0.25266	0.24996	0.26676
						202	0.20552	0.25136	0.2493	0.26494
						203	0.20512	0.25006	0.24864	0.26312
						204	0.20474	0.24876	0.24798	0.26132
						205	0.20434	0.24746	0.2473	0.25952
						206	0.20394	0.24616	0.24664	0.25772
						207	0.20352	0.24486	0.24596	0.25592
						208	0.20312	0.24358	0.24528	0.25414
						209	0.20272	0.24228	0.2446	0.25236
						210	0.2023	0.241	0.24392	0.25058
						211	0.2019	0.2397	0.24322	0.24882
						212	0.20148	0.23842	0.24252	0.24706
						213	0.20106	0.23714	0.24184	0.2453
						214	0.20064	0.23588	0.24114	0.24356
						215	0.20022	0.2346	0.24042	0.24182
						216	0.1998	0.23334	0.23972	0.24008
						217	0.19938	0.23206	0.23902	0.23836
						218	0.19896	0.2308	0.2383	0.23664
						219	0.19852	0.22954	0.2376	0.23492
						220	0.1981	0.22828	0.23688	0.23322
						221	0.19766	0.22702	0.23616	0.23152
						222	0.19724	0.22578	0.23544	0.22982
						223	0.1968	0.22452	0.2347	0.22814
						224	0.19636	0.22328	0.23398	0.22646
						225	0.19594	0.22204	0.23326	0.2248
						226	0.1955	0.2208	0.23252	0.22314
						227	0.19506	0.21956	0.23178	0.22148
						228	0.19462	0.21834	0.23106	0.21984
						229	0.19416	0.21712	0.23032	0.2182
						230	0.19372	0.21588	0.22958	0.21656
						231	0.19328	0.21468	0.22884	0.21494
						232	0.19284	0.21346	0.2281	0.21332
						233	0.19238	0.21224	0.22734	0.21172
						234	0.19194	0.21104	0.2266	0.21012
						235	0.19148	0.20984	0.22586	0.20854
						236	0.19104	0.20864	0.2251	0.20694
						237	0.19058	0.20744	0.22436	0.20538
						238	0.19014	0.20624	0.2236	0.2038
						239	0.18968	0.20506	0.22284	0.20224
						240	0.18922	0.20388	0.22208	0.2007
						241	0.18876	0.2027	0.22134	0.19916
						242	0.1883	0.20152	0.22058	0.19762
						243	0.18784	0.20034	0.21982	0.1961
						244	0.18738	0.19918	0.21906	0.19458
						245	0.18692	0.19802	0.2183	0.19306
						246	0.18646	0.19686	0.21754	0.19156
						247	0.186	0.1957	0.21678	0.19008
						248	0.18554	0.19454	0.21602	0.18858
						249	0.18508	0.1934	0.21524	0.1871
						250	0.18462	0.19226	0.21448	0.18564
						251	0.18416	0.19112	0.21372	0.18418
						252	0.18368	0.18998	0.21296	0.18272
						253	0.18322	0.18886	0.21218	0.18128
						254	0.18276	0.18774	0.21142	0.17986
						255	0.18228	0.18662	0.21066	0.17842
						256	0.18182	0.1855	0.20988	0.177
						257	0.18136	0.18438	0.20912	0.1756
						258	0.18088	0.18328	0.20836	0.1742
						259	0.18042	0.18218	0.20758	0.1728
						260	0.17994	0.18108	0.20682	0.17142
						261	0.17948	0.18	0.20604	0.17004
						262	0.179	0.1789	0.20528	0.16868
						263	0.17852	0.17782	0.20452	0.16732
						264	0.17806	0.17674	0.20374	0.16596
						265	0.17758	0.17566	0.20298	0.16462
						266	0.17712	0.1746	0.2022	0.16328
						267	0.17664	0.17352	0.20144	0.16196
						268	0.17616	0.17246	0.20068	0.16064
						269	0.1757	0.17142	0.1999	0.15934
						270	0.17522	0.17036	0.19914	0.15804
						271	0.17474	0.16932	0.19836	0.15674
						272	0.17428	0.16828	0.1976	0.15546
						273	0.1738	0.16724	0.19684	0.15418
						274	0.17332	0.1662	0.19606	0.15292
						275	0.17284	0.16518	0.1953	0.15166
						276	0.17238	0.16414	0.19454	0.1504
						277	0.1719	0.16314	0.19378	0.14916
						278	0.17142	0.16212	0.193	0.14792
						279	0.17094	0.1611	0.19224	0.1467
						280	0.17048	0.1601	0.19148	0.14548
						281	0.17	0.1591	0.19072	0.14426
						282	0.16952	0.1581	0.18996	0.14306
						283	0.16904	0.15712	0.1892	0.14188
						284	0.16858	0.15612	0.18844	0.14068
						285	0.1681	0.15514	0.18768	0.1395
						286	0.16762	0.15418	0.18692	0.13834
						287	0.16714	0.1532	0.18616	0.13718
						288	0.16668	0.15224	0.1854	0.13602
						289	0.1662	0.15126	0.18464	0.13488
						290	0.16572	0.15032	0.1839	0.13374
						291	0.16524	0.14936	0.18314	0.1326
						292	0.16478	0.1484	0.18238	0.13148
						293	0.1643	0.14746	0.18164	0.13038
						294	0.16382	0.14652	0.18088	0.12926
						295	0.16334	0.1456	0.18014	0.12816
						296	0.16288	0.14466	0.17938	0.12708
						297	0.1624	0.14374	0.17864	0.126
						298	0.16192	0.14282	0.1779	0.12492
						299	0.16146	0.1419	0.17714	0.12384
						300	0.16098	0.14098	0.1764	0.12278
						301	0.1605	0.14008	0.17566	0.12174
						302	0.16004	0.13918	0.17492	0.12068
						303	0.15956	0.13828	0.17418	0.11966
						304	0.1591	0.13738	0.17344	0.11862
						305	0.15862	0.1365	0.1727	0.1176
						306	0.15814	0.13562	0.17196	0.11658
						307	0.15768	0.13474	0.17122	0.11558
						308	0.1572	0.13386	0.1705	0.11458
						309	0.15674	0.133	0.16976	0.11358
						310	0.15626	0.13212	0.16902	0.1126
						311	0.1558	0.13126	0.1683	0.11162
						312	0.15532	0.13042	0.16758	0.11064
						313	0.15486	0.12956	0.16684	0.10968
						314	0.15438	0.12872	0.16612	0.10872
						315	0.15392	0.12788	0.1654	0.10778
						316	0.15346	0.12704	0.16468	0.10684
						317	0.15298	0.1262	0.16396	0.1059
						318	0.15252	0.12536	0.16324	0.10498
						319	0.15206	0.12454	0.16252	0.10406
						320	0.15158	0.12372	0.1618	0.10314
						321	0.15112	0.1229	0.16108	0.10224
						322	0.15066	0.1221	0.16038	0.10134
						323	0.1502	0.1213	0.15966	0.10044
						324	0.14972	0.12048	0.15896	0.09956
						325	0.14926	0.1197	0.15824	0.09868
						326	0.1488	0.1189	0.15754	0.0978
						327	0.14834	0.1181	0.15684	0.09694
						328	0.14788	0.11732	0.15614	0.09608
						329	0.14742	0.11654	0.15544	0.09522
						330	0.14696	0.11576	0.15474	0.09438
						331	0.1465	0.115	0.15404	0.09354
						332	0.14604	0.11422	0.15334	0.0927
						333	0.14558	0.11346	0.15264	0.09188
						334	0.14512	0.1127	0.15196	0.09106
						335	0.14466	0.11196	0.15126	0.09024
						336	0.1442	0.1112	0.15058	0.08944
						337	0.14376	0.11046	0.1499	0.08864
						338	0.1433	0.10972	0.1492	0.08784
						339	0.14284	0.10898	0.14852	0.08704
						340	0.14238	0.10824	0.14784	0.08626
						341	0.14194	0.10752	0.14716	0.0855
						342	0.14148	0.1068	0.14648	0.08472
						343	0.14102	0.10608	0.14582	0.08396
						344	0.14058	0.10536	0.14514	0.0832
						345	0.14012	0.10464	0.14446	0.08246
						346	0.13968	0.10394	0.1438	0.0817
						347	0.13922	0.10324	0.14314	0.08096
						348	0.13878	0.10254	0.14246	0.08024
						349	0.13832	0.10184	0.1418	0.0795
						350	0.13788	0.10114	0.14114	0.07878
						351	0.13744	0.10046	0.14048	0.07806
						352	0.13698	0.09978	0.13982	0.07736
						353	0.13654	0.0991	0.13916	0.07666
						354	0.1361	0.09842	0.13852	0.07596
						355	0.13566	0.09774	0.13786	0.07526
						356	0.13522	0.09708	0.13722	0.07458
						357	0.13478	0.09642	0.13656	0.0739
						358	0.13432	0.09576	0.13592	0.07322
						359	0.13388	0.0951	0.13528	0.07256
						360	0.13344	0.09444	0.13464	0.07188
						361	0.13302	0.0938	0.134	0.07122
						362	0.13258	0.09316	0.13336	0.07058
						363	0.13214	0.09252	0.13272	0.06992
						364	0.1317	0.09188	0.13208	0.06928
						365	0.13126	0.09124	0.13146	0.06864
						366	0.13082	0.09062	0.13082	0.06802
						367	0.1304	0.09	0.1302	0.06738
						368	0.12996	0.08938	0.12958	0.06676
						369	0.12952	0.08876	0.12896	0.06616
						370	0.1291	0.08814	0.12834	0.06554
						371	0.12866	0.08754	0.12772	0.06494
						372	0.12824	0.08692	0.1271	0.06434
						373	0.1278	0.08632	0.12648	0.06374
						374	0.12738	0.08572	0.12586	0.06314
						375	0.12696	0.08512	0.12526	0.06256
						376	0.12652	0.08454	0.12464	0.06198
						377	0.1261	0.08396	0.12404	0.0614
						378	0.12568	0.08336	0.12344	0.06084
						379	0.12526	0.08278	0.12284	0.06026
						380	0.12482	0.0822	0.12224	0.0597
						381	0.1244	0.08164	0.12164	0.05916
						382	0.12398	0.08106	0.12104	0.0586
						383	0.12356	0.0805	0.12044	0.05806
						384	0.12314	0.07994	0.11986	0.0575
						385	0.12272	0.07938	0.11926	0.05698
						386	0.1223	0.07882	0.11868	0.05644
						387	0.1219	0.07828	0.1181	0.0559
						388	0.12148	0.07772	0.11752	0.05538
						389	0.12106	0.07718	0.11694	0.05486
						390	0.12064	0.07664	0.11636	0.05436
						391	0.12024	0.0761	0.11578	0.05384
						392	0.11982	0.07556	0.1152	0.05334
						393	0.11942	0.07504	0.11462	0.05284
						394	0.119	0.0745	0.11406	0.05234
						395	0.1186	0.07398	0.11348	0.05184
						396	0.11818	0.07346	0.11292	0.05136
						397	0.11778	0.07294	0.11236	0.05086
						398	0.11736	0.07242	0.1118	0.05038
						399	0.11696	0.07192	0.11124	0.04992
						400	0.11656	0.0714	0.11068	0.04944
						401	0.11616	0.0709	0.11012	0.04898
						402	0.11576	0.0704	0.10958	0.0485
						403	0.11534	0.0699	0.10902	0.04806
						404	0.11494	0.0694	0.10846	0.0476
						405	0.11454	0.0689	0.10792	0.04714
						406	0.11414	0.06842	0.10738	0.0467
						407	0.11376	0.06794	0.10684	0.04626
						408	0.11336	0.06746	0.1063	0.04582
						409	0.11296	0.06698	0.10576	0.04538
						410	0.11256	0.0665	0.10522	0.04494
						411	0.11216	0.06602	0.10468	0.04452
						412	0.11178	0.06556	0.10416	0.0441
						413	0.11138	0.06508	0.10362	0.04368
						414	0.111	0.06462	0.1031	0.04326
						415	0.1106	0.06416	0.10256	0.04284
						416	0.11022	0.0637	0.10204	0.04244
						417	0.10982	0.06324	0.10152	0.04202
						418	0.10944	0.0628	0.101	0.04162
						419	0.10904	0.06234	0.10048	0.04122
						420	0.10866	0.0619	0.09998	0.04084
						421	0.10828	0.06146	0.09946	0.04044
						422	0.1079	0.06102	0.09894	0.04006
						423	0.10752	0.06058	0.09844	0.03966
						424	0.10714	0.06014	0.09792	0.03928
						425	0.10674	0.0597	0.09742	0.0389
						426	0.10638	0.05928	0.09692	0.03854
						427	0.106	0.05886	0.09642	0.03816
						428	0.10562	0.05842	0.09592	0.0378
						429	0.10524	0.058	0.09542	0.03744
						430	0.10486	0.05758	0.09494	0.03708
						431	0.10448	0.05718	0.09444	0.03672
						432	0.10412	0.05676	0.09394	0.03636
						433	0.10374	0.05636	0.09346	0.036
						434	0.10336	0.05594	0.09298	0.03566
						435	0.103	0.05554	0.09248	0.03532
						436	0.10262	0.05514	0.092	0.03498
						437	0.10226	0.05474	0.09152	0.03464
						438	0.10188	0.05434	0.09104	0.0343
						439	0.10152	0.05396	0.09058	0.03396
						440	0.10116	0.05356	0.0901	0.03364
						441	0.1008	0.05318	0.08962	0.03332
						442	0.10042	0.05278	0.08916	0.03298
						443	0.10006	0.0524	0.08868	0.03266
						444	0.0997	0.05202	0.08822	0.03234
						445	0.09934	0.05164	0.08776	0.03204
						446	0.09898	0.05126	0.0873	0.03172
						447	0.09862	0.0509	0.08684	0.03142
						448	0.09826	0.05052	0.08638	0.0311
						449	0.0979	0.05016	0.08592	0.0308
						450	0.09756	0.0498	0.08546	0.0305
						451	0.0972	0.04942	0.08502	0.0302
						452	0.09684	0.04906	0.08456	0.02992
						453	0.09648	0.04872	0.08412	0.02962
						454	0.09614	0.04836	0.08368	0.02934
						455	0.09578	0.048	0.08322	0.02904
						456	0.09544	0.04766	0.08278	0.02876
						457	0.09508	0.0473	0.08234	0.02848
						458	0.09474	0.04696	0.0819	0.0282
						459	0.0944	0.04662	0.08148	0.02792
						460	0.09404	0.04628	0.08104	0.02764
						461	0.0937	0.04594	0.0806	0.02738
						462	0.09336	0.0456	0.08018	0.0271
						463	0.09302	0.04526	0.07974	0.02684
						464	0.09268	0.04492	0.07932	0.02658
						465	0.09232	0.0446	0.0789	0.02632
						466	0.09198	0.04428	0.07848	0.02606
						467	0.09166	0.04394	0.07804	0.0258
						468	0.09132	0.04362	0.07764	0.02554
						469	0.09098	0.0433	0.07722	0.0253
						470	0.09064	0.04298	0.0768	0.02504
						471	0.0903	0.04266	0.07638	0.0248
						472	0.08996	0.04236	0.07598	0.02456
						473	0.08964	0.04204	0.07556	0.02432
						474	0.0893	0.04174	0.07516	0.02408
						475	0.08898	0.04142	0.07476	0.02384
						476	0.08864	0.04112	0.07434	0.0236
						477	0.08832	0.04082	0.07394	0.02336
						478	0.08798	0.04052	0.07354	0.02314
						479	0.08766	0.04022	0.07314	0.0229
						480	0.08732	0.03992	0.07276	0.02268
						481	0.087	0.03962	0.07236	0.02246
						482	0.08668	0.03932	0.07196	0.02224
						483	0.08636	0.03904	0.07158	0.02202
						484	0.08604	0.03874	0.07118	0.0218
						485	0.08572	0.03846	0.0708	0.02158
						486	0.0854	0.03818	0.07042	0.02136
						487	0.08508	0.0379	0.07002	0.02116
						488	0.08476	0.03762	0.06964	0.02094
						489	0.08444	0.03734	0.06926	0.02074
						490	0.08412	0.03706	0.06888	0.02052
						491	0.0838	0.03678	0.06852	0.02032
						492	0.08348	0.0365	0.06814	0.02012
						493	0.08318	0.03624	0.06776	0.01992
						494	0.08286	0.03596	0.0674	0.01972
						495	0.08254	0.0357	0.06702	0.01952
						496	0.08224	0.03544	0.06666	0.01934
						497	0.08192	0.03516	0.06628	0.01914
						498	0.08162	0.0349	0.06592	0.01894
						499	0.08132	0.03464	0.06556	0.01876
						500	0.081	0.03438	0.0652	0.01858
						501	0.0807	0.03414	0.06484	0.01838
						502	0.0804	0.03388	0.06448	0.0182
						503	0.08008	0.03362	0.06414	0.01802
						504	0.07978	0.03338	0.06378	0.01784
						505	0.07948	0.03312	0.06342	0.01766
						506	0.07918	0.03288	0.06308	0.01748
						507	0.07888	0.03262	0.06272	0.0173
						508	0.07858	0.03238	0.06238	0.01714
						509	0.07828	0.03214	0.06204	0.01696
						510	0.07798	0.0319	0.0617	0.0168
						511	0.07768	0.03166	0.06134	0.01662
						512	0.0774	0.03142	0.061	0.01646
						513	0.0771	0.0312	0.06068	0.0163
						514	0.0768	0.03096	0.06034	0.01612
						515	0.0765	0.03072	0.06	0.01596
						516	0.07622	0.0305	0.05966	0.0158
						517	0.07592	0.03026	0.05934	0.01564
						518	0.07564	0.03004	0.059	0.01548
						519	0.07534	0.02982	0.05868	0.01534
						520	0.07506	0.02958	0.05834	0.01518
						521	0.07478	0.02936	0.05802	0.01502
						522	0.07448	0.02914	0.0577	0.01488
						523	0.0742	0.02892	0.05738	0.01472
						524	0.07392	0.0287	0.05706	0.01458
						525	0.07364	0.0285	0.05674	0.01442
						526	0.07334	0.02828	0.05642	0.01428
						527	0.07306	0.02806	0.0561	0.01414
						528	0.07278	0.02786	0.05578	0.014
						529	0.0725	0.02764	0.05548	0.01386
						530	0.07222	0.02744	0.05516	0.01372
						531	0.07194	0.02722	0.05486	0.01358
						532	0.07168	0.02702	0.05454	0.01344
						533	0.0714	0.02682	0.05424	0.0133
						534	0.07112	0.02662	0.05394	0.01316
						535	0.07084	0.02642	0.05362	0.01304
						536	0.07058	0.02622	0.05332	0.0129
						537	0.0703	0.02602	0.05302	0.01278
						538	0.07002	0.02582	0.05272	0.01264
						539	0.06976	0.02562	0.05244	0.01252
						540	0.06948	0.02542	0.05214	0.01238
						541	0.06922	0.02524	0.05184	0.01226
						542	0.06894	0.02504	0.05154	0.01214
						543	0.06868	0.02486	0.05126	0.01202
						544	0.06842	0.02466	0.05096	0.0119
						545	0.06814	0.02448	0.05068	0.01178
						546	0.06788	0.0243	0.0504	0.01166
						547	0.06762	0.0241	0.0501	0.01154
						548	0.06736	0.02392	0.04982	0.01142
						549	0.0671	0.02374	0.04954	0.0113
						550	0.06684	0.02356	0.04926	0.01118
						551	0.06658	0.02338	0.04898	0.01106
						552	0.06632	0.0232	0.0487	0.01096
						553	0.06606	0.02304	0.04842	0.01084
						554	0.0658	0.02286	0.04814	0.01074
						555	0.06554	0.02268	0.04788	0.01062
						556	0.06528	0.0225	0.0476	0.01052
						557	0.06502	0.02234	0.04732	0.0104
						558	0.06478	0.02216	0.04706	0.0103
						559	0.06452	0.022	0.04678	0.0102
						560	0.06426	0.02184	0.04652	0.0101
						561	0.06402	0.02166	0.04626	0.01
						562	0.06376	0.0215	0.046	0.00988
						563	0.06352	0.02134	0.04572	0.00978
						564	0.06326	0.02118	0.04546	0.00968
						565	0.06302	0.02102	0.0452	0.00958
						566	0.06278	0.02084	0.04494	0.00948
						567	0.06252	0.0207	0.0447	0.0094
						568	0.06228	0.02054	0.04444	0.0093
						569	0.06204	0.02038	0.04418	0.0092
						570	0.0618	0.02022	0.04392	0.0091
						571	0.06154	0.02006	0.04368	0.00902
						572	0.0613	0.01992	0.04342	0.00892
						573	0.06106	0.01976	0.04318	0.00882
						574	0.06082	0.0196	0.04292	0.00874
						575	0.06058	0.01946	0.04268	0.00864
						576	0.06034	0.0193	0.04244	0.00856
						577	0.0601	0.01916	0.04218	0.00848
						578	0.05986	0.01902	0.04194	0.00838
						579	0.05964	0.01886	0.0417	0.0083
						580	0.0594	0.01872	0.04146	0.00822
						581	0.05916	0.01858	0.04122	0.00812
						582	0.05892	0.01844	0.04098	0.00804
						583	0.0587	0.0183	0.04074	0.00796
						584	0.05846	0.01816	0.04052	0.00788
						585	0.05824	0.01802	0.04028	0.0078
						586	0.058	0.01788	0.04004	0.00772
						587	0.05776	0.01774	0.03982	0.00764
						588	0.05754	0.0176	0.03958	0.00756
						589	0.05732	0.01746	0.03936	0.00748
						590	0.05708	0.01734	0.03912	0.0074
						591	0.05686	0.0172	0.0389	0.00732
						592	0.05664	0.01706	0.03868	0.00726
						593	0.0564	0.01694	0.03844	0.00718
						594	0.05618	0.0168	0.03822	0.0071
						595	0.05596	0.01668	0.038	0.00704
						596	0.05574	0.01654	0.03778	0.00696
						597	0.05552	0.01642	0.03756	0.00688
						598	0.0553	0.0163	0.03734	0.00682
						599	0.05508	0.01616	0.03712	0.00674
						600	0.05486	0.01604	0.03692	0.00668
						601	0.05464	0.01592	0.0367	0.0066
						602	0.05442	0.0158	0.03648	0.00654
						603	0.0542	0.01568	0.03626	0.00646
						604	0.05398	0.01556	0.03606	0.0064
						605	0.05376	0.01544	0.03584	0.00634
						606	0.05356	0.01532	0.03564	0.00628
						607	0.05334	0.0152	0.03542	0.0062
						608	0.05312	0.01508	0.03522	0.00614
						609	0.0529	0.01496	0.03502	0.00608
						610	0.0527	0.01484	0.03482	0.00602
						611	0.05248	0.01474	0.0346	0.00596
						612	0.05228	0.01462	0.0344	0.0059
						613	0.05206	0.0145	0.0342	0.00582
						614	0.05186	0.0144	0.034	0.00576
						615	0.05164	0.01428	0.0338	0.0057
						616	0.05144	0.01416	0.0336	0.00564
						617	0.05124	0.01406	0.0334	0.0056
						618	0.05102	0.01394	0.03322	0.00554
						619	0.05082	0.01384	0.03302	0.00548
						620	0.05062	0.01374	0.03282	0.00542
						621	0.05042	0.01362	0.03262	0.00536
						622	0.05022	0.01352	0.03244	0.0053
						623	0.05002	0.01342	0.03224	0.00526
						624	0.0498	0.01332	0.03206	0.0052
						625	0.0496	0.0132	0.03186	0.00514
						626	0.0494	0.0131	0.03168	0.00508
						627	0.0492	0.013	0.0315	0.00504
						628	0.049	0.0129	0.0313	0.00498
						629	0.04882	0.0128	0.03112	0.00494
						630	0.04862	0.0127	0.03094	0.00488
						631	0.04842	0.0126	0.03076	0.00482
						632	0.04822	0.0125	0.03058	0.00478
						633	0.04802	0.0124	0.0304	0.00472
						634	0.04784	0.01232	0.03022	0.00468
						635	0.04764	0.01222	0.03004	0.00464
						636	0.04744	0.01212	0.02986	0.00458
						637	0.04726	0.01202	0.02968	0.00454
						638	0.04706	0.01194	0.0295	0.00448
						639	0.04688	0.01184	0.02934	0.00444
						640	0.04668	0.01174	0.02916	0.0044
						641	0.0465	0.01166	0.02898	0.00434
						642	0.0463	0.01156	0.02882	0.0043
						643	0.04612	0.01148	0.02864	0.00426
						644	0.04592	0.01138	0.02848	0.00422
						645	0.04574	0.0113	0.0283	0.00416
						646	0.04556	0.0112	0.02814	0.00412
						647	0.04538	0.01112	0.02796	0.00408
						648	0.04518	0.01104	0.0278	0.00404
						649	0.045	0.01094	0.02764	0.004
						650	0.04482	0.01086	0.02748	0.00396
						651	0.04464	0.01078	0.0273	0.00392
						652	0.04446	0.0107	0.02714	0.00388
						653	0.04428	0.01062	0.02698	0.00384
						654	0.0441	0.01052	0.02682	0.0038
						655	0.04392	0.01044	0.02666	0.00376
						656	0.04374	0.01036	0.0265	0.00372
						657	0.04356	0.01028	0.02634	0.00368
						658	0.04338	0.0102	0.02618	0.00364
						659	0.0432	0.01012	0.02604	0.0036
						660	0.04302	0.01004	0.02588	0.00356
						661	0.04284	0.00996	0.02572	0.00352
						662	0.04268	0.00988	0.02556	0.00348
						663	0.0425	0.0098	0.02542	0.00344
						664	0.04232	0.00974	0.02526	0.00342
						665	0.04216	0.00966	0.02512	0.00338
						666	0.04198	0.00958	0.02496	0.00334
						667	0.0418	0.0095	0.02482	0.0033
						668	0.04164	0.00942	0.02466	0.00326
						669	0.04146	0.00936	0.02452	0.00324
						670	0.0413	0.00928	0.02436	0.0032
						671	0.04112	0.0092	0.02422	0.00316
						672	0.04096	0.00914	0.02408	0.00314
						673	0.04078	0.00906	0.02394	0.0031
						674	0.04062	0.009	0.02378	0.00306
						675	0.04046	0.00892	0.02364	0.00304
						676	0.04028	0.00886	0.0235	0.003
						677	0.04012	0.00878	0.02336	0.00298
						678	0.03996	0.00872	0.02322	0.00294
						679	0.0398	0.00864	0.02308	0.0029
						680	0.03964	0.00858	0.02294	0.00288
						681	0.03946	0.00852	0.0228	0.00284
						682	0.0393	0.00844	0.02266	0.00282
						683	0.03914	0.00838	0.02254	0.00278
						684	0.03898	0.00832	0.0224	0.00276
						685	0.03882	0.00824	0.02226	0.00274
						686	0.03866	0.00818	0.02212	0.0027
						687	0.0385	0.00812	0.022	0.00268
						688	0.03834	0.00806	0.02186	0.00264
						689	0.03818	0.00798	0.02174	0.00262
						690	0.03802	0.00792	0.0216	0.00258
						691	0.03788	0.00786	0.02146	0.00256
						692	0.03772	0.0078	0.02134	0.00254
						693	0.03756	0.00774	0.0212	0.0025
						694	0.0374	0.00768	0.02108	0.00248
						695	0.03724	0.00762	0.02096	0.00246
						696	0.0371	0.00756	0.02082	0.00242
						697	0.03694	0.0075	0.0207	0.0024
						698	0.03678	0.00744	0.02058	0.00238
						699	0.03664	0.00738	0.02046	0.00236
						700	0.03648	0.00732	0.02032	0.00232
						701	0.03634	0.00726	0.0202	0.0023
						702	0.03618	0.0072	0.02008	0.00228
						703	0.03604	0.00714	0.01996	0.00226
						704	0.03588	0.0071	0.01984	0.00224
						705	0.03574	0.00704	0.01972	0.0022
						706	0.03558	0.00698	0.0196	0.00218
						707	0.03544	0.00692	0.01948	0.00216
						708	0.0353	0.00688	0.01936	0.00214
						709	0.03514	0.00682	0.01924	0.00212
						710	0.035	0.00676	0.01912	0.0021
						711	0.03486	0.0067	0.01902	0.00206
						712	0.0347	0.00666	0.0189	0.00204
						713	0.03456	0.0066	0.01878	0.00202
						714	0.03442	0.00656	0.01866	0.002
						715	0.03428	0.0065	0.01856	0.00198
						716	0.03414	0.00644	0.01844	0.00196
						717	0.034	0.0064	0.01832	0.00194
						718	0.03386	0.00634	0.01822	0.00192
						719	0.03372	0.0063	0.0181	0.0019
						720	0.03358	0.00624	0.018	0.00188
						721	0.03344	0.0062	0.01788	0.00186
						722	0.0333	0.00614	0.01778	0.00184
						723	0.03316	0.0061	0.01766	0.00182
						724	0.03302	0.00604	0.01756	0.0018
						725	0.03288	0.006	0.01746	0.00178
						726	0.03274	0.00596	0.01734	0.00176
						727	0.0326	0.0059	0.01724	0.00174
						728	0.03246	0.00586	0.01714	0.00173
						729	0.03234	0.00582	0.01704	0.00171
						730	0.0322	0.00576	0.01692	0.00169
						731	0.03206	0.00572	0.01682	0.00167
						732	0.03192	0.00568	0.01672	0.00165
						733	0.0318	0.00564	0.01662	0.00164
						734	0.03166	0.00558	0.01652	0.00162
						735	0.03152	0.00554	0.01642	0.0016
						736	0.0314	0.0055	0.01632	0.00158
						737	0.03126	0.00546	0.01622	0.00157
						738	0.03114	0.00542	0.01612	0.00155
						739	0.031	0.00536	0.01602	0.00153
						740	0.03088	0.00532	0.01592	0.00152
						741	0.03074	0.00528	0.01582	0.0015
						742	0.03062	0.00524	0.01572	0.00148
						743	0.03048	0.0052	0.01562	0.00147
						744	0.03036	0.00516	0.01554	0.00145
						745	0.03024	0.00512	0.01544	0.00144
						746	0.0301	0.00508	0.01534	0.00142
						747	0.02998	0.00504	0.01524	0.00141
						748	0.02986	0.005	0.01516	0.00139
						749	0.02972	0.00496	0.01506	0.00138
						750	0.0296	0.00492	0.01496	0.00136
						751	0.02948	0.00488	0.01488	0.00135
						752	0.02936	0.00484	0.01478	0.00133
						753	0.02924	0.0048	0.0147	0.00132
						754	0.0291	0.00476	0.0146	0.00131
						755	0.02898	0.00472	0.01452	0.00129
						756	0.02886	0.00468	0.01442	0.00128
						757	0.02874	0.00464	0.01434	0.00126
						758	0.02862	0.00462	0.01424	0.00125
						759	0.0285	0.00458	0.01416	0.00124
						760	0.02838	0.00454	0.01408	0.00122
						761	0.02826	0.0045	0.01398	0.00121
						762	0.02814	0.00446	0.0139	0.0012
						763	0.02802	0.00442	0.01382	0.00118
						764	0.0279	0.0044	0.01372	0.00117
						765	0.02778	0.00436	0.01364	0.00116
						766	0.02768	0.00432	0.01356	0.00115
						767	0.02756	0.00428	0.01348	0.00113
						768	0.02744	0.00426	0.0134	0.00112
						769	0.02732	0.00422	0.0133	0.00111
						770	0.0272	0.00418	0.01322	0.0011
						771	0.0271	0.00416	0.01314	0.00109
						772	0.02698	0.00412	0.01306	0.00107
						773	0.02686	0.00408	0.01298	0.00106
						774	0.02674	0.00406	0.0129	0.00105
						775	0.02664	0.00402	0.01282	0.00104
						776	0.02652	0.00398	0.01274	0.00103
						777	0.02642	0.00396	0.01266	0.00102
						778	0.0263	0.00392	0.01258	0.00101
						779	0.02618	0.0039	0.0125	0.000996526
						780	0.02608	0.00386	0.01242	0.000985808
						781	0.02596	0.00384	0.01236	0.000975204
						782	0.02586	0.0038	0.01228	0.00096471
						783	0.02574	0.00378	0.0122	0.000954328
						784	0.02564	0.00374	0.01212	0.000944058
						785	0.02554	0.00372	0.01204	0.000933896
						786	0.02542	0.00368	0.01198	0.00092384
						787	0.02532	0.00366	0.0119	0.000913892
						788	0.0252	0.00362	0.01182	0.00090405
						789	0.0251	0.0036	0.01176	0.000894312
						790	0.025	0.00356	0.01168	0.000884678
						791	0.02488	0.00354	0.0116	0.000875144
						792	0.02478	0.0035	0.01154	0.000865714
						793	0.02468	0.00348	0.01146	0.000856382
						794	0.02458	0.00346	0.0114	0.00084715
						795	0.02446	0.00342	0.01132	0.000838016
						796	0.02436	0.0034	0.01124	0.00082898
						797	0.02426	0.00336	0.01118	0.00082004
						798	0.02416	0.00334	0.01112	0.000811194
						799	0.02406	0.00332	0.01104	0.000802442
						800	0.02396	0.00328	0.01098	0.000793784
						801	0.02384	0.00326	0.0109	0.000785218
						802	0.02374	0.00324	0.01084	0.000776742
						803	0.02364	0.0032	0.01076	0.000768358
						804	0.02354	0.00318	0.0107	0.000760062
						805	0.02344	0.00316	0.01064	0.000751854
						806	0.02334	0.00314	0.01056	0.000743734
						807	0.02324	0.0031	0.0105	0.0007357
						808	0.02314	0.00308	0.01044	0.000727752
						809	0.02304	0.00306	0.01038	0.000719888
						810	0.02296	0.00304	0.0103	0.00071211
						811	0.02286	0.003	0.01024	0.000704412
						812	0.02276	0.00298	0.01018	0.000696798
						813	0.02266	0.00296	0.01012	0.000689264
						814	0.02256	0.00294	0.01006	0.000681812
						815	0.02246	0.00292	0.00998	0.000674438
						816	0.02236	0.00288	0.00992	0.000667142
						817	0.02228	0.00286	0.00986	0.000659926
						818	0.02218	0.00284	0.0098	0.000652786
						819	0.02208	0.00282	0.00974	0.000645722
						820	0.022	0.0028	0.00968	0.000638734
						821	0.0219	0.00278	0.00962	0.00063182
						822	0.0218	0.00276	0.00956	0.00062498
						823	0.0217	0.00274	0.0095	0.000618212
						824	0.02162	0.0027	0.00944	0.000611518
						825	0.02152	0.00268	0.00938	0.000604894
						826	0.02144	0.00266	0.00932	0.000598342
						827	0.02134	0.00264	0.00926	0.00059186
						828	0.02124	0.00262	0.0092	0.000585448
						829	0.02116	0.0026	0.00914	0.000579102
						830	0.02106	0.00258	0.0091	0.000572826
						831	0.02098	0.00256	0.00904	0.000566616
						832	0.02088	0.00254	0.00898	0.000560474
						833	0.0208	0.00252	0.00892	0.000554396
						834	0.0207	0.0025	0.00886	0.000548384
						835	0.02062	0.00248	0.0088	0.000542436
						836	0.02054	0.00246	0.00876	0.000536552
						837	0.02044	0.00244	0.0087	0.000530732
						838	0.02036	0.00242	0.00864	0.000524972
						839	0.02026	0.0024	0.00858	0.000519276
						840	0.02018	0.00238	0.00854	0.00051364
						841	0.0201	0.00236	0.00848	0.000508064
						842	0.02	0.00234	0.00842	0.000502548
						843	0.01992	0.00232	0.00838	0.000497092
						844	0.01984	0.0023	0.00832	0.000491692
						845	0.01976	0.00228	0.00826	0.000486352
						846	0.01966	0.00226	0.00822	0.00048107
						847	0.01958	0.00224	0.00816	0.000475842
						848	0.0195	0.00222	0.00812	0.000470672
						849	0.01942	0.00222	0.00806	0.000465558
						850	0.01934	0.0022	0.00802	0.000460498
						851	0.01924	0.00218	0.00796	0.000455492
						852	0.01916	0.00216	0.00792	0.00045054
						853	0.01908	0.00214	0.00786	0.000445642
						854	0.019	0.00212	0.00782	0.000440796
						855	0.01892	0.0021	0.00776	0.000436002
						856	0.01884	0.00208	0.00772	0.000431258
						857	0.01876	0.00208	0.00766	0.000426566
						858	0.01868	0.00206	0.00762	0.000421926
						859	0.0186	0.00204	0.00756	0.000417334
						860	0.01852	0.00202	0.00752	0.000412792
						861	0.01844	0.002	0.00748	0.0004083
						862	0.01836	0.00199	0.00742	0.000403854
						863	0.01828	0.00197	0.00738	0.000399458
						864	0.0182	0.00196	0.00734	0.000395108
						865	0.01812	0.00194	0.00728	0.000390804
						866	0.01804	0.00193	0.00724	0.000386548
						867	0.01796	0.00191	0.0072	0.000382338
						868	0.01788	0.00189	0.00714	0.000378172
						869	0.0178	0.00188	0.0071	0.000374052
						870	0.01774	0.00186	0.00706	0.000369976
						871	0.01766	0.00185	0.00702	0.000365944
						872	0.01758	0.00183	0.00698	0.000361954
						873	0.0175	0.00182	0.00692	0.000358008
						874	0.01742	0.0018	0.00688	0.000354104
						875	0.01736	0.00179	0.00684	0.000350244
						876	0.01728	0.00177	0.0068	0.000346424
						877	0.0172	0.00176	0.00676	0.000342646
						878	0.01712	0.00175	0.0067	0.000338908
						879	0.01706	0.00173	0.00666	0.00033521
						880	0.01698	0.00172	0.00662	0.000331552
						881	0.0169	0.0017	0.00658	0.000327934
						882	0.01684	0.00169	0.00654	0.000324354
						883	0.01676	0.00168	0.0065	0.000320814
						884	0.01668	0.00166	0.00646	0.000317312
						885	0.01662	0.00165	0.00642	0.000313848
						886	0.01654	0.00164	0.00638	0.00031042
						887	0.01648	0.00162	0.00634	0.00030703
						888	0.0164	0.00161	0.0063	0.000303676
						889	0.01632	0.0016	0.00626	0.00030036
						890	0.01626	0.00158	0.00622	0.000297078
						891	0.01618	0.00157	0.00618	0.000293832
						892	0.01612	0.00156	0.00614	0.000290622
						893	0.01604	0.00154	0.0061	0.000287446
						894	0.01598	0.00153	0.00606	0.000284304
						895	0.0159	0.00152	0.00602	0.000281196
						896	0.01584	0.00151	0.00598	0.00027812
						897	0.01578	0.0015	0.00594	0.00027508
						898	0.0157	0.00148	0.0059	0.000272072
						899	0.01564	0.00147	0.00586	0.000269096
						900	0.01556	0.00146	0.00584	0.000266152
						901	0.0155	0.00145	0.0058	0.00026324
						902	0.01544	0.00144	0.00576	0.00026036
						903	0.01536	0.00142	0.00572	0.000257512
						904	0.0153	0.00141	0.00568	0.000254694
						905	0.01524	0.0014	0.00564	0.000251906
						906	0.01516	0.00139	0.00562	0.000249148
						907	0.0151	0.00138	0.00558	0.000246422
						908	0.01504	0.00137	0.00554	0.000243724
						909	0.01496	0.00136	0.0055	0.000241054
						910	0.0149	0.00134	0.00548	0.000238414
						911	0.01484	0.00133	0.00544	0.000235804
						912	0.01478	0.00132	0.0054	0.00023322
						913	0.01472	0.00131	0.00536	0.000230666
						914	0.01464	0.0013	0.00534	0.000228138
						915	0.01458	0.00129	0.0053	0.000225638
						916	0.01452	0.00128	0.00526	0.000223166
						917	0.01446	0.00127	0.00524	0.00022072
						918	0.0144	0.00126	0.0052	0.0002183
						919	0.01434	0.00125	0.00516	0.000215906
						920	0.01426	0.00124	0.00514	0.00021354
						921	0.0142	0.00123	0.0051	0.000211198
						922	0.01414	0.00122	0.00506	0.000208882
						923	0.01408	0.00121	0.00504	0.00020659
						924	0.01402	0.0012	0.005	0.000204324
						925	0.01396	0.00119	0.00496	0.000202082
						926	0.0139	0.00118	0.00494	0.000199866
						927	0.01384	0.00117	0.0049	0.000197673
						928	0.01378	0.00116	0.00488	0.000195503
						929	0.01372	0.00115	0.00484	0.000193358
						930	0.01366	0.00114	0.00482	0.000191235
						931	0.0136	0.00113	0.00478	0.000189136
						932	0.01354	0.00112	0.00476	0.000187059
						933	0.01348	0.00111	0.00472	0.000185005
						934	0.01342	0.0011	0.0047	0.000182974
						935	0.01336	0.00109	0.00466	0.000180964
						936	0.0133	0.00109	0.00464	0.000178976
						937	0.01324	0.00108	0.0046	0.00017701
						938	0.01318	0.00107	0.00458	0.000175066
						939	0.01314	0.00106	0.00454	0.000173142
						940	0.01308	0.00105	0.00452	0.000171239
						941	0.01302	0.00104	0.00448	0.000169358
						942	0.01296	0.00103	0.00446	0.000167496
						943	0.0129	0.00103	0.00442	0.000165655
						944	0.01284	0.00102	0.0044	0.000163834
						945	0.01278	0.00101	0.00438	0.000162032
						946	0.01274	0.001	0.00434	0.000160251
						947	0.01268	0.00099216	0.00432	0.000158488
						948	0.01262	0.000984036	0.00428	0.000156745
						949	0.01256	0.000975976	0.00426	0.000155021
						950	0.01252	0.000967982	0.00424	0.000153316
						951	0.01246	0.000960052	0.0042	0.000151629
						952	0.0124	0.000952186	0.00418	0.000149961
						953	0.01234	0.000944384	0.00416	0.00014831
						954	0.0123	0.000936646	0.00412	0.000146678
						955	0.01224	0.00092897	0.0041	0.000145064
						956	0.01218	0.000921356	0.00408	0.000143467
						957	0.01214	0.000913804	0.00404	0.000141887
						958	0.01208	0.000906312	0.00402	0.000140325
						959	0.01202	0.000898882	0.004	0.00013878
						960	0.01198	0.000891512	0.00396	0.000137252
						961	0.01192	0.000884202	0.00394	0.00013574
						962	0.01186	0.00087695	0.00392	0.000134245
						963	0.01182	0.000869756	0.0039	0.000132766
						964	0.01176	0.000862622	0.00386	0.000131303
						965	0.01172	0.000855546	0.00384	0.000129857
						966	0.01166	0.000848526	0.00382	0.000128426
						967	0.01162	0.000841564	0.0038	0.00012701
						968	0.01156	0.000834658	0.00376	0.000125611
						969	0.0115	0.000827808	0.00374	0.000124226
						970	0.01146	0.000821014	0.00372	0.000122857
						971	0.0114	0.000814274	0.0037	0.000121502
						972	0.01136	0.00080759	0.00368	0.000120162
						973	0.0113	0.000800958	0.00364	0.000118837
						974	0.01126	0.000794382	0.00362	0.000117527
						975	0.0112	0.000787858	0.0036	0.00011623
						976	0.01116	0.000781388	0.00358	0.000114948
						977	0.01112	0.00077497	0.00356	0.00011368
						978	0.01106	0.000768604	0.00354	0.000112426
						979	0.01102	0.00076229	0.0035	0.000111186
						980	0.01096	0.000756028	0.00348	0.000109959
						981	0.01092	0.000749816	0.00346	0.000108745
						982	0.01086	0.000743654	0.00344	0.000107545
						983	0.01082	0.000737542	0.00342	0.000106358
						984	0.01078	0.00073148	0.0034	0.000105184
						985	0.01072	0.000725468	0.00338	0.000104022
						986	0.01068	0.000719504	0.00336	0.000102874
						987	0.01064	0.000713588	0.00334	0.000101738
						988	0.01058	0.00070772	0.00332	0.000100614
						989	0.01054	0.0007019	0.00328	9.95028e-05
						990	0.0105	0.000696128	0.00326	9.84036e-05
						991	0.01044	0.000690404	0.00324	9.73166e-05
						992	0.0104	0.000684724	0.00322	9.62414e-05
						993	0.01036	0.000679092	0.0032	9.5178e-05
						994	0.0103	0.000673504	0.00318	9.41262e-05
						995	0.01026	0.000667964	0.00316	9.3086e-05
						996	0.01022	0.000662466	0.00314	9.2057e-05
						997	0.01018	0.000657014	0.00312	9.10396e-05
						998	0.01012	0.000651608	0.0031	9.0033e-05
						999	0.01008	0.000646244	0.00308	8.90376e-05
						1000	0.01004	0.000640924	0.00306	8.80532e-05
						1001	0.01	0.000635648	0.00304	8.70796e-05
						1002	0.00996	0.000630414	0.00302	8.61164e-05
						1003	0.0099	0.000625224	0.003	8.5164e-05
						1004	0.00986	0.000620076	0.00298	8.4222e-05
						1005	0.00982	0.000614968	0.00296	8.32904e-05
						1006	0.00978	0.000609904	0.00294	8.23688e-05
						1007	0.00974	0.00060488	0.00292	8.14576e-05
						1008	0.00968	0.000599896	0.0029	8.05562e-05
						1009	0.00964	0.000594954	0.00288	7.96646e-05
						1010	0.0096	0.000590052	0.00286	7.8783e-05
						1011	0.00956	0.00058519	0.00286	7.7911e-05
						1012	0.00952	0.000580368	0.00284	7.70486e-05
						1013	0.00948	0.000575584	0.00282	7.61956e-05
						1014	0.00944	0.00057084	0.0028	7.5352e-05
						1015	0.0094	0.000566134	0.00278	7.45176e-05
						1016	0.00936	0.000561468	0.00276	7.36924e-05
						1017	0.00932	0.000556838	0.00274	7.28764e-05
						1018	0.00926	0.000552248	0.00272	7.20692e-05
						1019	0.00922	0.000547694	0.0027	7.12708e-05
						1020	0.00918	0.000543176	0.00268	7.04814e-05
						1021	0.00914	0.000538696	0.00268	6.97004e-05
						1022	0.0091	0.000534254	0.00266	6.89282e-05
						1023	0.00906	0.000529846	0.00264	6.81644e-05
						1024	0.00902	0.000525474	0.00262	6.7409e-05
						1025	0.00898	0.00052114	0.0026	6.6662e-05
						1026	0.00894	0.00051684	0.00258	6.5923e-05
						1027	0.0089	0.000512574	0.00256	6.51922e-05
						1028	0.00886	0.000508344	0.00256	6.44696e-05
						1029	0.00882	0.000504148	0.00254	6.37548e-05
						1030	0.00878	0.000499988	0.00252	6.30478e-05
						1031	0.00876	0.00049586	0.0025	6.23488e-05
						1032	0.00872	0.000491766	0.00248	6.16572e-05
						1033	0.00868	0.000487706	0.00248	6.09734e-05
						1034	0.00864	0.000483678	0.00246	6.02972e-05
						1035	0.0086	0.000479684	0.00244	5.96282e-05
						1036	0.00856	0.000475722	0.00242	5.89668e-05
						1037	0.00852	0.000471794	0.0024	5.83126e-05
						1038	0.00848	0.000467896	0.0024	5.76654e-05
						1039	0.00844	0.000464032	0.00238	5.70256e-05
						1040	0.0084	0.000460198	0.00236	5.63928e-05
						1041	0.00836	0.000456396	0.00234	5.57668e-05
						1042	0.00834	0.000452624	0.00232	5.51478e-05
						1043	0.0083	0.000448884	0.00232	5.45356e-05
						1044	0.00826	0.000445174	0.0023	5.39302e-05
						1045	0.00822	0.000441496	0.00228	5.33314e-05
						1046	0.00818	0.000437846	0.00226	5.27392e-05
						1047	0.00814	0.000434226	0.00226	5.21536e-05
						1048	0.00812	0.000430636	0.00224	5.15744e-05
						1049	0.00808	0.000427076	0.00222	5.10016e-05
						1050	0.00804	0.000423544	0.00222	5.0435e-05
						1051	0.008	0.000420042	0.0022	4.98748e-05
						1052	0.00796	0.000416568	0.00218	4.93206e-05
						1053	0.00794	0.000413124	0.00216	4.87726e-05
						1054	0.0079	0.000409706	0.00216	4.82308e-05
						1055	0.00786	0.000406318	0.00214	4.76948e-05
						1056	0.00782	0.000402956	0.00212	4.71646e-05
						1057	0.0078	0.000399622	0.00212	4.66404e-05
						1058	0.00776	0.000396316	0.0021	4.6122e-05
						1059	0.00772	0.000393036	0.00208	4.56094e-05
						1060	0.0077	0.000389784	0.00208	4.51022e-05
						1061	0.00766	0.000386558	0.00206	4.46008e-05
						1062	0.00762	0.000383358	0.00204	4.4105e-05
						1063	0.00758	0.000380184	0.00204	4.36144e-05
						1064	0.00756	0.000377038	0.00202	4.31294e-05
						1065	0.00752	0.000373916	0.002	4.26498e-05
						1066	0.00748	0.00037082	0.00199	4.21754e-05
						1067	0.00746	0.00036775	0.00198	4.17062e-05
						1068	0.00742	0.000364704	0.00196	4.12422e-05
						1069	0.00738	0.000361684	0.00195	4.07834e-05
						1070	0.00736	0.000358688	0.00194	4.03296e-05
						1071	0.00732	0.000355718	0.00193	3.98808e-05
						1072	0.0073	0.00035277	0.00191	3.9437e-05
						1073	0.00726	0.000349848	0.0019	3.8998e-05
						1074	0.00722	0.00034695	0.00189	3.8564e-05
						1075	0.0072	0.000344074	0.00188	3.81348e-05
						1076	0.00716	0.000341224	0.00186	3.77102e-05
						1077	0.00712	0.000338396	0.00185	3.72904e-05
						1078	0.0071	0.000335592	0.00184	3.68752e-05
						1079	0.00706	0.00033281	0.00183	3.64646e-05
						1080	0.00704	0.000330052	0.00182	3.60586e-05
						1081	0.007	0.000327316	0.0018	3.5657e-05
						1082	0.00698	0.000324602	0.00179	3.52598e-05
						1083	0.00694	0.00032191	0.00178	3.4867e-05
						1084	0.0069	0.000319242	0.00177	3.44786e-05
						1085	0.00688	0.000316594	0.00176	3.40946e-05
						1086	0.00684	0.000313968	0.00175	3.37146e-05
						1087	0.00682	0.000311364	0.00173	3.3339e-05
						1088	0.00678	0.000308782	0.00172	3.29676e-05
						1089	0.00676	0.00030622	0.00171	3.26002e-05
						1090	0.00672	0.00030368	0.0017	3.22368e-05
						1091	0.0067	0.00030116	0.00169	3.18774e-05
						1092	0.00666	0.000298662	0.00168	3.15222e-05
						1093	0.00664	0.000296184	0.00167	3.11708e-05
						1094	0.0066	0.000293726	0.00166	3.08232e-05
						1095	0.00658	0.000291288	0.00165	3.04796e-05
						1096	0.00654	0.000288872	0.00163	3.01398e-05
						1097	0.00652	0.000286474	0.00162	2.98036e-05
						1098	0.00648	0.000284096	0.00161	2.94712e-05
						1099	0.00646	0.000281736	0.0016	2.91426e-05
						1100	0.00644	0.000279398	0.00159	2.88176e-05
						1101	0.0064	0.000277078	0.00158	2.8496e-05
						1102	0.00638	0.000274778	0.00157	2.81782e-05
						1103	0.00634	0.000272496	0.00156	2.78638e-05
						1104	0.00632	0.000270232	0.00155	2.7553e-05
						1105	0.00628	0.000267988	0.00154	2.72454e-05
						1106	0.00626	0.000265762	0.00153	2.69414e-05
						1107	0.00624	0.000263556	0.00152	2.66408e-05
						1108	0.0062	0.000261366	0.00151	2.63434e-05
						1109	0.00618	0.000259194	0.0015	2.60494e-05
						1110	0.00616	0.00025704	0.00149	2.57586e-05
						1111	0.00612	0.000254906	0.00148	2.5471e-05
						1112	0.0061	0.000252786	0.00147	2.51866e-05
						1113	0.00606	0.000250686	0.00146	2.49054e-05
						1114	0.00604	0.000248602	0.00145	2.46274e-05
						1115	0.00602	0.000246536	0.00144	2.43524e-05
						1116	0.00598	0.000244488	0.00143	2.40804e-05
						1117	0.00596	0.000242454	0.00142	2.38114e-05
						1118	0.00594	0.00024044	0.00141	2.35454e-05
						1119	0.0059	0.00023844	0.0014	2.32824e-05
						1120	0.00588	0.000236458	0.0014	2.30224e-05
						1121	0.00586	0.000234492	0.00139	2.27652e-05
						1122	0.00582	0.000232542	0.00138	2.25108e-05
						1123	0.0058	0.000230608	0.00137	2.22592e-05
						1124	0.00578	0.00022869	0.00136	2.20106e-05
						1125	0.00574	0.000226788	0.00135	2.17646e-05
						1126	0.00572	0.0002249	0.00134	2.15214e-05
						1127	0.0057	0.00022303	0.00133	2.12808e-05
						1128	0.00568	0.000221174	0.00132	2.1043e-05
						1129	0.00564	0.000219334	0.00132	2.08076e-05
						1130	0.00562	0.00021751	0.00131	2.0575e-05
						1131	0.0056	0.0002157	0.0013	2.0345e-05
						1132	0.00558	0.000213904	0.00129	2.01176e-05
						1133	0.00554	0.000212124	0.00128	1.98926e-05
						1134	0.00552	0.000210358	0.00127	1.96701e-05
						1135	0.0055	0.000208608	0.00126	1.94501e-05
						1136	0.00548	0.00020687	0.00126	1.92326e-05
						1137	0.00544	0.000205148	0.00125	1.90175e-05
						1138	0.00542	0.00020344	0.00124	1.88047e-05
						1139	0.0054	0.000201746	0.00123	1.85944e-05
						1140	0.00538	0.000200066	0.00122	1.83863e-05
						1141	0.00536	0.000198401	0.00121	1.81806e-05
						1142	0.00532	0.000196749	0.00121	1.79772e-05
						1143	0.0053	0.00019511	0.0012	1.7776e-05
						1144	0.00528	0.000193485	0.00119	1.75771e-05
						1145	0.00526	0.000191873	0.00118	1.73803e-05
						1146	0.00524	0.000190275	0.00118	1.71858e-05
						1147	0.0052	0.00018869	0.00117	1.69934e-05
						1148	0.00518	0.000187118	0.00116	1.68032e-05
						1149	0.00516	0.000185559	0.00115	1.66151e-05
						1150	0.00514	0.000184012	0.00114	1.64291e-05
						1151	0.00512	0.000182479	0.00114	1.62451e-05
						1152	0.0051	0.000180958	0.00113	1.60632e-05
						1153	0.00506	0.00017945	0.00112	1.58833e-05
						1154	0.00504	0.000177954	0.00111	1.57054e-05
						1155	0.00502	0.000176471	0.00111	1.55295e-05
						1156	0.005	0.000175	0.0011	1.53556e-05
						1157	0.00498	0.000173541	0.00109	1.51836e-05
						1158	0.00496	0.000172094	0.00109	1.50135e-05
						1159	0.00494	0.000170659	0.00108	1.48453e-05
						1160	0.00492	0.000169236	0.00107	1.4679e-05
						1161	0.00488	0.000167825	0.00106	1.45145e-05
						1162	0.00486	0.000166425	0.00106	1.43519e-05
						1163	0.00484	0.000165037	0.00105	1.4191e-05
						1164	0.00482	0.000163661	0.00104	1.4032e-05
						1165	0.0048	0.000162296	0.00104	1.38747e-05
						1166	0.00478	0.000160942	0.00103	1.37192e-05
						1167	0.00476	0.000159599	0.00102	1.35654e-05
						1168	0.00474	0.000158268	0.00102	1.34133e-05
						1169	0.00472	0.000156947	0.00101	1.3263e-05
						1170	0.0047	0.000155637	0.001	1.31142e-05
						1171	0.00468	0.000154339	0.000995914	1.29672e-05
						1172	0.00466	0.000153051	0.000989326	1.28218e-05
						1173	0.00464	0.000151773	0.000982782	1.2678e-05
						1174	0.00462	0.000150507	0.000976278	1.25358e-05
						1175	0.0046	0.00014925	0.000969818	1.23952e-05
						1176	0.00456	0.000148004	0.0009634	1.22562e-05
						1177	0.00454	0.000146769	0.000957024	1.21187e-05
						1178	0.00452	0.000145544	0.00095069	1.19828e-05
						1179	0.0045	0.000144328	0.000944396	1.18483e-05
						1180	0.00448	0.000143123	0.000938144	1.17154e-05
						1181	0.00446	0.000141928	0.000931934	1.15839e-05
						1182	0.00444	0.000140743	0.000925762	1.1454e-05
						1183	0.00442	0.000139568	0.000919632	1.13254e-05
						1184	0.0044	0.000138402	0.00091354	1.11983e-05
						1185	0.00438	0.000137246	0.000907488	1.10726e-05
						1186	0.00436	0.000136099	0.000901478	1.09484e-05
						1187	0.00434	0.000134963	0.000895504	1.08255e-05
						1188	0.00432	0.000133835	0.000889572	1.07039e-05
						1189	0.0043	0.000132717	0.000883676	1.05838e-05
						1190	0.00428	0.000131608	0.00087782	1.04649e-05
						1191	0.00426	0.000130508	0.000872002	1.03474e-05
						1192	0.00426	0.000129418	0.000866222	1.02313e-05
						1193	0.00424	0.000128336	0.000860478	1.01164e-05
						1194	0.00422	0.000127264	0.000854774	1.00028e-05
						1195	0.0042	0.0001262	0.000849106	9.89042e-06
						1196	0.00418	0.000125145	0.000843476	9.77934e-06
						1197	0.00416	0.000124099	0.000837882	9.66948e-06
						1198	0.00414	0.000123062	0.000832324	9.56086e-06
						1199	0.00412	0.000122033	0.000826802	9.45346e-06
						1200	0.0041	0.000121013	0.000821318	9.34726e-06
						1201	0.00408	0.000120001	0.000815868	9.24224e-06
						1202	0.00406	0.000118997	0.000810454	9.13838e-06
						1203	0.00404	0.000118002	0.000805076	9.0357e-06
						1204	0.00402	0.000117015	0.000799732	8.93416e-06
						1205	0.004	0.000116037	0.000794424	8.83376e-06
						1206	0.00398	0.000115066	0.000789152	8.73448e-06
						1207	0.00398	0.000114104	0.000783912	8.6363e-06
						1208	0.00396	0.000113149	0.000778708	8.53922e-06
						1209	0.00394	0.000112203	0.000773536	8.44322e-06
						1210	0.00392	0.000111264	0.0007684	8.3483e-06
						1211	0.0039	0.000110333	0.000763296	8.25446e-06
						1212	0.00388	0.00010941	0.000758226	8.16164e-06
						1213	0.00386	0.000108495	0.00075319	8.06988e-06
						1214	0.00384	0.000107587	0.000748186	7.97912e-06
						1215	0.00384	0.000106686	0.000743214	7.8894e-06
						1216	0.00382	0.000105793	0.000738276	7.80066e-06
						1217	0.0038	0.000104908	0.00073337	7.71294e-06
						1218	0.00378	0.00010403	0.000728496	7.62618e-06
						1219	0.00376	0.000103159	0.000723654	7.5404e-06
						1220	0.00374	0.000102295	0.000718844	7.45558e-06
						1221	0.00372	0.000101439	0.000714064	7.3717e-06
						1222	0.00372	0.00010059	0.000709318	7.28876e-06
						1223	0.0037	9.97476e-05	0.0007046	7.20676e-06
						1224	0.00368	9.89124e-05	0.000699916	7.12566e-06
						1225	0.00366	9.8084e-05	0.00069526	7.04548e-06
						1226	0.00364	9.72626e-05	0.000690636	6.9662e-06
						1227	0.00362	9.64482e-05	0.000686042	6.8878e-06
						1228	0.00362	9.56404e-05	0.000681478	6.81028e-06
						1229	0.0036	9.48392e-05	0.000676944	6.73362e-06
						1230	0.00358	9.40448e-05	0.00067244	6.65782e-06
						1231	0.00356	9.3257e-05	0.000667964	6.58288e-06
						1232	0.00354	9.24758e-05	0.00066352	6.50876e-06
						1233	0.00352	9.1701e-05	0.000659104	6.43548e-06
						1234	0.00352	9.09328e-05	0.000654716	6.36302e-06
						1235	0.0035	9.01708e-05	0.000650358	6.29138e-06
						1236	0.00348	8.94152e-05	0.000646028	6.22054e-06
						1237	0.00346	8.8666e-05	0.000641726	6.15048e-06
						1238	0.00346	8.79228e-05	0.000637452	6.08122e-06
						1239	0.00344	8.7186e-05	0.000633208	6.01272e-06
						1240	0.00342	8.64552e-05	0.00062899	5.945e-06
						1241	0.0034	8.57306e-05	0.0006248	5.87804e-06
						1242	0.00338	8.5012e-05	0.000620638	5.81182e-06
						1243	0.00338	8.42992e-05	0.000616504	5.74636e-06
						1244	0.00336	8.35926e-05	0.000612396	5.68162e-06
						1245	0.00334	8.28918e-05	0.000608316	5.6176e-06
						1246	0.00332	8.21968e-05	0.000604262	5.5543e-06
						1247	0.00332	8.15074e-05	0.000600234	5.49172e-06
						1248	0.0033	8.0824e-05	0.000596234	5.42984e-06
						1249	0.00328	8.01462e-05	0.00059226	5.36864e-06
						1250	0.00326	7.9474e-05	0.000588312	5.30814e-06
						1251	0.00326	7.88076e-05	0.000584388	5.2483e-06
						1252	0.00324	7.81466e-05	0.000580492	5.18916e-06
						1253	0.00322	7.7491e-05	0.000576622	5.13066e-06
						1254	0.0032	7.6841e-05	0.000572776	5.07282e-06
						1255	0.0032	7.61964e-05	0.000568956	5.01564e-06
						1256	0.00318	7.55572e-05	0.00056516	4.95908e-06
						1257	0.00316	7.49232e-05	0.00056139	4.90316e-06
						1258	0.00316	7.42946e-05	0.000557646	4.84788e-06
						1259	0.00314	7.36712e-05	0.000553924	4.79322e-06
						1260	0.00312	7.3053e-05	0.000550228	4.73916e-06
						1261	0.0031	7.244e-05	0.000546556	4.68572e-06
						1262	0.0031	7.1832e-05	0.000542908	4.63286e-06
						1263	0.00308	7.12292e-05	0.000539286	4.58062e-06
						1264	0.00306	7.06314e-05	0.000535686	4.52894e-06
						1265	0.00306	7.00384e-05	0.00053211	4.47786e-06
						1266	0.00304	6.94506e-05	0.000528556	4.42734e-06
						1267	0.00302	6.88674e-05	0.000525028	4.3774e-06
						1268	0.00302	6.82894e-05	0.000521522	4.328e-06
						1269	0.003	6.7716e-05	0.00051804	4.27918e-06
						1270	0.00298	6.71474e-05	0.00051458	4.2309e-06
						1271	0.00296	6.65836e-05	0.000511142	4.18314e-06
						1272	0.00296	6.60246e-05	0.000507728	4.13594e-06
						1273	0.00294	6.547e-05	0.000504336	4.08926e-06
						1274	0.00292	6.49202e-05	0.000500966	4.04312e-06
						1275	0.00292	6.4375e-05	0.00049762	3.99748e-06
						1276	0.0029	6.38344e-05	0.000494294	3.95236e-06
						1277	0.00288	6.32982e-05	0.00049099	3.90774e-06
						1278	0.00288	6.27664e-05	0.00048771	3.86362e-06
						1279	0.00286	6.22392e-05	0.00048445	3.82e-06
						1280	0.00286	6.17162e-05	0.00048121	3.77688e-06
						1281	0.00284	6.11978e-05	0.000477994	3.73424e-06
						1282	0.00282	6.06836e-05	0.000474798	3.69208e-06
						1283	0.00282	6.01738e-05	0.000471624	3.65038e-06
						1284	0.0028	5.9668e-05	0.00046847	3.60916e-06
						1285	0.00278	5.91666e-05	0.000465336	3.5684e-06
						1286	0.00278	5.86694e-05	0.000462224	3.5281e-06
						1287	0.00276	5.81764e-05	0.000459132	3.48824e-06
						1288	0.00274	5.76874e-05	0.000456062	3.44884e-06
						1289	0.00274	5.72026e-05	0.00045301	3.40988e-06
						1290	0.00272	5.67218e-05	0.00044998	3.37136e-06
						1291	0.00272	5.6245e-05	0.000446968	3.33328e-06
						1292	0.0027	5.5772e-05	0.000443978	3.29562e-06
						1293	0.00268	5.53032e-05	0.000441006	3.25838e-06
						1294	0.00268	5.48382e-05	0.000438054	3.22156e-06
						1295	0.00266	5.43772e-05	0.000435122	3.18516e-06
						1296	0.00264	5.392e-05	0.00043221	3.14916e-06
						1297	0.00264	5.34666e-05	0.000429316	3.11358e-06
						1298	0.00262	5.3017e-05	0.000426442	3.0784e-06
						1299	0.00262	5.2571e-05	0.000423586	3.0436e-06
						1300	0.0026	5.2129e-05	0.00042075	3.0092e-06
						1301	0.00258	5.16904e-05	0.000417932	2.97518e-06
						1302	0.00258	5.12556e-05	0.000415134	2.94154e-06
						1303	0.00256	5.08246e-05	0.000412352	2.9083e-06
						1304	0.00256	5.0397e-05	0.00040959	2.87542e-06
						1305	0.00254	4.9973e-05	0.000406846	2.8429e-06
						1306	0.00254	4.95526e-05	0.00040412	2.81076e-06
						1307	0.00252	4.91358e-05	0.000401412	2.77898e-06
						1308	0.0025	4.87222e-05	0.000398722	2.74756e-06
						1309	0.0025	4.83124e-05	0.00039605	2.71648e-06
						1310	0.00248	4.79058e-05	0.000393396	2.68576e-06
						1311	0.00248	4.75026e-05	0.00039076	2.65538e-06
						1312	0.00246	4.71028e-05	0.00038814	2.62536e-06
						1313	0.00246	4.67064e-05	0.000385538	2.59566e-06
						1314	0.00244	4.63134e-05	0.000382954	2.5663e-06
						1315	0.00242	4.59236e-05	0.000380386	2.53726e-06
						1316	0.00242	4.5537e-05	0.000377836	2.50856e-06
						1317	0.0024	4.51536e-05	0.000375302	2.48018e-06
						1318	0.0024	4.47736e-05	0.000372784	2.45212e-06
						1319	0.00238	4.43966e-05	0.000370284	2.42438e-06
						1320	0.00238	4.40228e-05	0.0003678	2.39694e-06
						1321	0.00236	4.36522e-05	0.000365334	2.36982e-06
						1322	0.00236	4.32846e-05	0.000362882	2.343e-06
						1323	0.00234	4.292e-05	0.000360448	2.31648e-06
						1324	0.00234	4.25586e-05	0.00035803	2.29026e-06
						1325	0.00232	4.22002e-05	0.000355626	2.26434e-06
						1326	0.0023	4.18448e-05	0.00035324	2.2387e-06
						1327	0.0023	4.14924e-05	0.00035087	2.21336e-06
						1328	0.00228	4.1143e-05	0.000348514	2.18832e-06
						1329	0.00228	4.07964e-05	0.000346174	2.16354e-06
						1330	0.00226	4.04528e-05	0.00034385	2.13904e-06
						1331	0.00226	4.0112e-05	0.000341542	2.11482e-06
						1332	0.00224	3.9774e-05	0.000339248	2.09088e-06
						1333	0.00224	3.9439e-05	0.00033697	2.0672e-06
						1334	0.00222	3.91066e-05	0.000334708	2.0438e-06
						1335	0.00222	3.87772e-05	0.00033246	2.02064e-06
						1336	0.0022	3.84504e-05	0.000330228	1.99777e-06
						1337	0.0022	3.81264e-05	0.000328008	1.97514e-06
						1338	0.00218	3.7805e-05	0.000325806	1.95277e-06
						1339	0.00218	3.74864e-05	0.000323616	1.93065e-06
						1340	0.00216	3.71706e-05	0.000321442	1.90878e-06
						1341	0.00216	3.68572e-05	0.000319282	1.88716e-06
						1342	0.00214	3.65466e-05	0.000317138	1.86578e-06
						1343	0.00214	3.62384e-05	0.000315006	1.84464e-06
						1344	0.00212	3.5933e-05	0.000312888	1.82374e-06
						1345	0.00212	3.563e-05	0.000310786	1.80308e-06
						1346	0.0021	3.53298e-05	0.000308696	1.78265e-06
						1347	0.0021	3.50318e-05	0.000306622	1.76245e-06
						1348	0.00208	3.47364e-05	0.00030456	1.74247e-06
						1349	0.00208	3.44436e-05	0.000302512	1.72273e-06
						1350	0.00206	3.41532e-05	0.000300478	1.7032e-06
						1351	0.00206	3.38652e-05	0.000298458	1.6839e-06
						1352	0.00206	3.35796e-05	0.00029645	1.66481e-06
						1353	0.00204	3.32964e-05	0.000294456	1.64594e-06
						1354	0.00204	3.30156e-05	0.000292476	1.62728e-06
						1355	0.00202	3.2737e-05	0.000290508	1.60884e-06
						1356	0.00202	3.2461e-05	0.000288554	1.5906e-06
						1357	0.002	3.21872e-05	0.000286614	1.57256e-06
						1358	0.00199	3.19156e-05	0.000284684	1.55473e-06
						1359	0.00199	3.16464e-05	0.00028277	1.5371e-06
						1360	0.00198	3.13794e-05	0.000280866	1.51967e-06
						1361	0.00197	3.11146e-05	0.000278976	1.50244e-06
						1362	0.00196	3.0852e-05	0.000277098	1.4854e-06
						1363	0.00195	3.05918e-05	0.000275234	1.46856e-06
						1364	0.00194	3.03336e-05	0.00027338	1.4519e-06
						1365	0.00193	3.00776e-05	0.00027154	1.43543e-06
						1366	0.00192	2.98238e-05	0.000269712	1.41915e-06
						1367	0.00191	2.95722e-05	0.000267896	1.40306e-06
						1368	0.00191	2.93226e-05	0.000266092	1.38714e-06
						1369	0.0019	2.9075e-05	0.0002643	1.3714e-06
						1370	0.00189	2.88296e-05	0.00026252	1.35584e-06
						1371	0.00188	2.85862e-05	0.000260752	1.34046e-06
						1372	0.00187	2.8345e-05	0.000258996	1.32525e-06
						1373	0.00186	2.81058e-05	0.000257252	1.31022e-06
						1374	0.00185	2.78684e-05	0.000255518	1.29535e-06
						1375	0.00184	2.76332e-05	0.000253798	1.28065e-06
						1376	0.00184	2.73998e-05	0.000252088	1.26612e-06
						1377	0.00183	2.71684e-05	0.000250388	1.25175e-06
						1378	0.00182	2.6939e-05	0.000248702	1.23754e-06
						1379	0.00181	2.67116e-05	0.000247026	1.22349e-06
						1380	0.0018	2.6486e-05	0.00024536	1.20961e-06
						1381	0.00179	2.62624e-05	0.000243706	1.19588e-06
						1382	0.00179	2.60406e-05	0.000242064	1.1823e-06
						1383	0.00178	2.58206e-05	0.000240432	1.16888e-06
						1384	0.00177	2.56026e-05	0.000238812	1.15561e-06
						1385	0.00176	2.53862e-05	0.000237202	1.14249e-06
						1386	0.00175	2.51718e-05	0.000235602	1.12952e-06
						1387	0.00175	2.49592e-05	0.000234014	1.11669e-06
						1388	0.00174	2.47484e-05	0.000232434	1.10401e-06
						1389	0.00173	2.45392e-05	0.000230868	1.09148e-06
						1390	0.00172	2.43318e-05	0.00022931	1.07908e-06
						1391	0.00171	2.41264e-05	0.000227764	1.06683e-06
						1392	0.00171	2.39224e-05	0.000226228	1.05471e-06
						1393	0.0017	2.37204e-05	0.0002247	1.04273e-06
						1394	0.00169	2.35198e-05	0.000223184	1.03089e-06
						1395	0.00168	2.33212e-05	0.000221678	1.01918e-06
						1396	0.00168	2.3124e-05	0.000220184	1.0076e-06
						1397	0.00167	2.29286e-05	0.000218698	9.96154e-07
						1398	0.00166	2.27348e-05	0.000217222	9.84836e-07
						1399	0.00165	2.25426e-05	0.000215756	9.73648e-07
						1400	0.00164	2.2352e-05	0.0002143	9.62586e-07

## Sheet: Figure.7C
	catastrophe frequency (×10-3, s-1)
lifetime (s)	control	20 nM MCAK	50 nM XMAP215	20 nM MCAK + 50 nM XMAP215
50	0.00196	0.0034	0.00156	0.00332
150	0.00267	0.00444	0.00415	0.00534
250	0.00307	0.0043	0.00368	0.00568
350	0.00276	0.00508	0.00284	0.00553
450	0.00275	0.005	0.00377	0.00412
550	0.00368	0.00469	0.00364	0.006
